# Supplementary material for: Mitochondrial signatures of infant mesenchymal stem cells predict child adiposity: The Healthy Start Study
Source: Research Square preprint supplement (doi:10.21203/rs.3.rs-9476945/v1), 2026-05-11
Supplement: Supplementary file 1 [file 3971cb98e40115fe27105a5b.xlsx]

## Sheet: Table of Contents
Table of Contents for Supplemental Tables.
Table S1.	Participant characteristics in MSC subset relative to full Healthy Start Cohort
Table S2.	Model summary tables.
Table S3.	Association of gene expression with FM% at birth [ALL GENES, no FDR cut-off]
Table S4.	Association of gene expression with FM% at 4-6 months of age [ALL GENES, no FDR cut-off]
Table S5.	Association of gene expression with FM% at 4-6 years of age [ALL GENES, no FDR cut-off]
Table S6.	Gene set enrichment analysis: Pathways enriched for gene expression associated with FM% at birth [ALL PATHWAYS, no FDR cut-off]
Table S7.	Gene set enrichment analysis: Pathways enriched for gene expression associated with FM% at 4-6 mo of age [ALL PATHWAYS, no FDR cut-off]
Table S8.	Gene set enrichment analysis: Pathways enriched for gene expression associated with FM% at 4-6 years of age [ALL PATHWAYS, no FDR cut-off]
Table S9.	Gene set enrichment analysis: Shared pathways enriched for gene expression associated with FM% at all three postnatal assessments (at-birth, 4-6 months and 4-6 years of age (FDR<0.05 for GO and FDR<0.2 for Reactome)
Table S10.	Gene set enrichment analysis: Shared pathways enriched for gene expression associated with FM% at both 4-6 months and 4-6 years of age (FDR<0.05)
Table S11.	Overlap of Leading Edge Genes in Significant Reactome Pathways (FDR < 0.05) as Input for the Methylation Analysis Model
Table S12.	Differentially methylated CpGs among leading edge genes* with FM% at 4-6 months of age
Table S13.	Differentially methylated CpGs among leading edge genes* with FM% at 4-6 years of age
Table S14.	Differentially methylated regions among leading edge genes* with FM% at 4-6 months of age
Table S15.	Differentially methylated regions among leading edge genes* with FM% at 4-6 years of age
*Shared leading edge genes from Table S11

## Sheet: Table S1
Table S1. Participant characteristics in MSC subset relative to full Healthy Start Cohort
		Larger Healthy Start Cohort
(N=140)	Mean (SD) or n (%)	Statistic	N	Ref.
Mother
Age	28.6 (6.1)	27.8 (6.2)	1325	From: doi:10.1001/jamanetworkopen.2023.7030
Primiparous, n	72 (51%)	689 (52%)	1325	From: doi:10.1001/jamanetworkopen.2023.7030
Pre-pregnancy BMI (kg/m2)	25.0 (5.0)	25.7 (6.1)	1325	From: doi:10.1001/jamanetworkopen.2023.7030
Obese, n	19 (14%)	259 (20%)	1325	From: doi:10.1001/jamanetworkopen.2023.7031
Race and ethnicity, n
Non-Hispanic White	80 (57%)	713 (54%)	1325	From: doi:10.1001/jamanetworkopen.2023.7030
Hispanic	36 (26%)	322 (24%)	1325	From: doi:10.1001/jamanetworkopen.2023.7030
Non-Hispanic Black	14 (10%)	207 (16%)	1325	From: doi:10.1001/jamanetworkopen.2023.7030
Other	10 (7%)	83 (6%)	1325	From: doi:10.1001/jamanetworkopen.2023.7030
Child
Females, n	62 (44%)	536 (48%)	1102	From: https://doi.org/10.1016/j.jpeds.2017.01.014
Gestational age at birth (wks)	39.4 (1.3)	39.4 (1.6)	1102	From: https://doi.org/10.1016/j.jpeds.2017.01.014
MSC time to confluence (d)	27.1 (7.8)	n/a
Birth weight (g)	3268 (431)	3240 (500)	1102	From: https://doi.org/10.1016/j.jpeds.2017.01.014
Fat mass (kg) at birth (n = 134)	0.31 (0.2)	0.30 (0.15)	1102	From: https://doi.org/10.1016/j.jpeds.2017.01.014
Fat mass (%) at birth (n = 134)	9.6 (4.1)	9.2 (3.9)	1102	From: https://doi.org/10.1016/j.jpeds.2017.01.014
Age at 4-6 month visit (mo)	4.8 (1.1)	5.5 (1.5)	640	From: https://doi.org/10.1016/j.jpeds.2017.01.014
Weight (kg) at 4-6mo visit (n = 129)	6.8 (0.9)	6.9 (1.0)	640	From: https://doi.org/10.1016/j.jpeds.2017.01.014
Fat mass (kg) at 4-6mo visit (n = 128)	1.6 (0.5)	1.65 (0.49)	640	From: https://doi.org/10.1016/j.jpeds.2017.01.014
Fat mass (%) at 4-6mo visit (n = 128)	24.7 (5.6)	24.0 (5.4)	640	From: https://doi.org/10.1016/j.jpeds.2017.01.014
Age at child visit (yrs)	4.6 (0.2)	4.8 (0.7)	419	From: https://doi.org/10.1210/clinem/dgab115
Weight (kg) at child visit (n = 85)	17.8 (3.7)	18.3 (3.2)	419	From: https://doi.org/10.1210/clinem/dgab115
Fat mass (kg) at child visit (n = 81)	3.5 (2.1)	3.7 (1.7)	419	From: https://doi.org/10.1210/clinem/dgab115
Fat mass (%) at child visit (n = 81)	19.4 (7.0)	19.9 (6.6)	419	From: https://doi.org/10.1210/clinem/dgab115
Data are mean ± SD, unless otherwise stated.
Please note full Healthy Start Cohort data from published reports are mean ± SD, unless otherwise noted.

## Sheet: Table S2
Table S2. Summary analysis tables
S2a. MSC RNAseq and child adiposity models summary. Number of significant transcripts for each time point.
	N Subjects	FDR < 0.05	FDR < 0.10	FDR < 0.20
FM% at birth	133	5	5	7
FM% at 4-6 mos	127	296	849	1968
FM% at 4-6 yrs	81	1	1	1
S2b. MSC gene set enrichment analysis and child adiposity models summary. Number of significant gene sets for each time point
	Reactome		GO
	FDR < 0.05	FDR < 0.1	FDR < 0.05	FDR < 0.1
FM% at birth	3	8	51	73
FM% at 4-6 mos	267	332	181	247
FM% at 4-6 yrs	400	499	345	482
S2c. Targeted differential methylation analysis with child adiposity model summary. Number of significant CpGs and regions for each time point (4-6mo and 4-6 yrs).
	CpGs
	N	FDR < 0.05	FDR < 0.10	FDR < 0.20
FM% at 4-6 mos	55	0	0	4
FM% at 4-6 yrs	27	0	0	0
	Regions
	N	FDR < 0.05	FDR < 0.10	FDR < 0.20
FM% at 4-6 mos	55	5	13	18
FM% at 4-6 yrs	27	0	1	1

## Sheet: Table S3
Table S3. Association of gene expression with FM% at birth. Adjusted for child's gestational age at birth.
Ensembl Gene ID	Gene Symbol	Mean of Normalized Counts	Magnitude	Wald Statistic	p-value	FDR
ENSG00000162631	NTNG1	14.6451	-0.141546	367.217	7.55e-82	1.21e-77
ENSG00000169297	NR0B1	10.2636	0.18912	308.589	4.43e-69	3.54e-65
ENSG00000176435	CLEC14A	13.6631	-0.0594282	34.0953	5.25e-09	2.79e-05
ENSG00000166165	CKB	273.953	-0.115967	24.1147	9.08e-07	0.00362565
ENSG00000163032	VSNL1	16.2766	-0.0969198	19.1478	1.21e-05	0.03866
ENSG00000279233		73.8567	0.0523493	15.5895	7.87e-05	0.182804
ENSG00000099937	SERPIND1	13.811	0.143531	15.5562	8.01e-05	0.182804
ENSG00000107077	KDM4C	485.912	0.0148042	13.1814	0.00028274	0.443383
ENSG00000128016	ZFP36	786.99	-0.0607559	13.1803	0.00028291	0.443383
ENSG00000196458	ZNF605	609.06	0.0222503	13.1686	0.000284679	0.443383
ENSG00000178150	ZNF114	30.5049	0.0415646	13.0379	0.000305246	0.443383
ENSG00000162595	DIRAS3	146.159	0.107828	12.7478	0.000356435	0.45627
ENSG00000099958	DERL3	26.8119	0.120747	12.6717	0.00037123	0.45627
ENSG00000258441	LINC00641	311.943	0.0325032	12.5124	0.000404252	0.457991
ENSG00000180185	FAHD1	770.839	-0.0176473	12.3973	0.000429957	0.457991
ENSG00000204650	LINC02210	228.397	0.044475	12.0306	0.000523336	0.496342
ENSG00000153234	NR4A2	33.9297	-0.0784928	12.0138	0.00052809	0.496342
ENSG00000115457	IGFBP2	378.054	0.040307	11.9008	0.00056111	0.498079
ENSG00000198829	SUCNR1	11.5715	0.161458	11.1099	0.000858663	0.608102
ENSG00000125538	IL1B	1150.97	0.103527	11.0659	0.000879304	0.608102
ENSG00000132185	FCRLA	15.6198	0.0857841	11.0244	0.00089919	0.608102
ENSG00000156500	PABIR3	36.0867	-0.0238609	10.9576	0.000932181	0.608102
ENSG00000167641	PPP1R14A	90.1598	-0.107348	10.9466	0.000937732	0.608102
ENSG00000133805	AMPD3	570.282	0.0697468	10.9271	0.000947696	0.608102
ENSG00000106211	HSPB1	16872.5	-0.0257546	10.9197	0.000951467	0.608102
ENSG00000102580	DNAJC3	2728.62	0.0338022	10.3776	0.00127556	0.769623
ENSG00000171017	LRRC8E	382.761	0.0297418	10.2978	0.00133188	0.769623
ENSG00000104635	SLC39A14	5077.39	0.030012	10.0614	0.00151409	0.769623
ENSG00000262413		72.5704	-0.0381014	10.0105	0.00155649	0.769623
ENSG00000143450	OAZ3	40.3992	-0.0285023	9.94545	0.00161247	0.769623
ENSG00000279519		19.626	0.0412573	9.91689	0.00163769	0.769623
ENSG00000164400	CSF2	26.5663	0.170718	9.91453	0.00163979	0.769623
ENSG00000123870	ZNF137P	18.8806	0.0355098	9.9091	0.00164463	0.769623
ENSG00000023839	ABCC2	30.4738	0.0456777	9.86229	0.00168701	0.769623
ENSG00000070476	ZXDC	405.577	0.01464	9.82735	0.00171935	0.769623
ENSG00000153832	FBXO36	48.1188	-0.0283107	9.73577	0.00180716	0.769623
ENSG00000106330	MOSPD3	436.094	-0.0168481	9.7346	0.00180831	0.769623
ENSG00000149428	HYOU1	13791.9	0.0422396	9.69599	0.0018467	0.769623
ENSG00000197548	ATG7	829.041	0.0162997	9.66459	0.00187854	0.769623
ENSG00000173530	TNFRSF10D	4829.91	0.0451111	9.61703	0.00192781	0.770065
ENSG00000241749	RPSAP52	27.6006	0.0470283	9.53559	0.00201526	0.78536
ENSG00000146250	PRSS35	209.341	-0.0602634	9.4743	0.0020837	0.787859
ENSG00000154258	ABCA9	69.8609	0.0543684	9.44238	0.00212029	0.787859
ENSG00000111012	CYP27B1	27.6263	0.0469511	9.37286	0.00220221	0.792748
ENSG00000044574	HSPA5	49022.7	0.053393	9.22905	0.00238205	0.792748
ENSG00000107562	CXCL12	173.399	-0.0975141	9.22818	0.00238318	0.792748
ENSG00000230202		209.782	0.0701671	9.21479	0.00240068	0.792748
ENSG00000263503	MAPK8IP1P2	17.0275	0.162198	9.19517	0.00242655	0.792748
ENSG00000123358	NR4A1	132.811	-0.0561014	9.09607	0.0025616	0.792748
ENSG00000197632	SERPINB2	968.479	0.0313817	9.03709	0.00264557	0.792748
ENSG00000177479	ARIH2	1946.22	0.00850611	8.98766	0.00271809	0.792748
ENSG00000121895	TMEM156	27.2409	0.0830251	8.96787	0.00274769	0.792748
ENSG00000204599	TRIM39	437.824	0.0137544	8.96301	0.00275501	0.792748
ENSG00000184857	TMEM186	128.804	0.0152755	8.90328	0.00284658	0.792748
ENSG00000156475	PPP2R2B	152.653	-0.0714444	8.85549	0.00292208	0.792748
ENSG00000186376	ZNF75D	206.271	0.0187247	8.82621	0.00296934	0.792748
ENSG00000168517	HEXIM2	71.66	-0.020365	8.82324	0.00297418	0.792748
ENSG00000161912	ADCY10P1	23.2277	0.0554045	8.81761	0.00298337	0.792748
ENSG00000128590	DNAJB9	1080.48	0.0421421	8.80349	0.00300655	0.792748
ENSG00000197847	SLC22A20P	17.9749	0.0426887	8.80306	0.00300726	0.792748
ENSG00000072832	CRMP1	35.4364	-0.0949381	8.71692	0.00315271	0.792748
ENSG00000166598	HSP90B1	41622.8	0.0319189	8.59611	0.00336882	0.792748
ENSG00000242114	MTFP1	106.593	0.0303259	8.59075	0.00337874	0.792748
ENSG00000107954	NEURL1	43.1434	0.0664458	8.56192	0.00343267	0.792748
ENSG00000223551	TMSB4XP4	217.444	-0.0258525	8.53523	0.00348338	0.792748
ENSG00000079337	RAPGEF3	234.27	0.0294146	8.52264	0.00350755	0.792748
ENSG00000198855	FICD	641.581	0.0388116	8.49137	0.00356835	0.792748
ENSG00000155660	PDIA4	13594.6	0.0343001	8.4883	0.00357437	0.792748
ENSG00000187608	ISG15	1245.47	-0.0520582	8.47241	0.00360574	0.792748
ENSG00000011451	WIZ	3103.23	-0.00977669	8.4216	0.0037079	0.792748
ENSG00000163491	NEK10	43.7274	0.0760281	8.41763	0.003716	0.792748
ENSG00000184110	EIF3C	10974.5	0.0243265	8.41702	0.00371725	0.792748
ENSG00000115474	KCNJ13	16.1547	0.125571	8.40627	0.00373929	0.792748
ENSG00000144908	ALDH1L1	18.0688	0.129321	8.39375	0.00376514	0.792748
ENSG00000101265	RASSF2	61.2074	-0.0656714	8.38667	0.00377984	0.792748
ENSG00000219607	PPP1R3G	59.9309	-0.0409938	8.3677	0.00381949	0.792748
ENSG00000167476	JSRP1	38.7991	-0.0270173	8.34224	0.00387337	0.792748
ENSG00000164379	FOXQ1	164.325	0.0786115	8.32411	0.00391223	0.792748
ENSG00000084463	WBP11	1451.64	-0.0112793	8.29788	0.00396913	0.792748
ENSG00000204713	TRIM27	1656.34	0.0101741	8.29264	0.00398061	0.792748
ENSG00000184164	CRELD2	2549.24	0.0454739	8.22152	0.00413965	0.792748
ENSG00000102882	MAPK3	1973.71	-0.0149466	8.21396	0.00415693	0.792748
ENSG00000169429	CXCL8	1492.91	0.137557	8.17964	0.00423632	0.792748
ENSG00000239653	PSMD6-AS2	15.8462	0.0494313	8.17893	0.00423798	0.792748
ENSG00000134802	SLC43A3	1195.04	0.0513459	8.1701	0.00425866	0.792748
ENSG00000184995	IFNE	49.5317	0.0439485	8.1666	0.00426688	0.792748
ENSG00000117228	GBP1	1068.05	-0.0336845	8.13168	0.00434985	0.798872
ENSG00000103404	USP31	405.845	0.0224654	8.09986	0.00442687	0.801466
ENSG00000024422	EHD2	16045.1	-0.0186575	8.04403	0.00456538	0.801466
ENSG00000011523	CEP68	204.658	-0.0224871	8.04331	0.00456721	0.801466
ENSG00000087589	CASS4	28.3576	-0.0520296	8.02263	0.00461965	0.801466
ENSG00000088280	ASAP3	726.762	-0.0228349	8.01969	0.00462715	0.801466
ENSG00000261087	ZNNT1	27.2773	0.0452748	8.00496	0.00466493	0.801466
ENSG00000005108	THSD7A	32.3656	-0.0621175	7.9726	0.00474907	0.807241
ENSG00000173540	GMPPB	1113.34	0.0217675	7.94421	0.00482415	0.81137
ENSG00000244879	GABPB1-AS1	617.165	0.0451853	7.9153	0.00490185	0.81557
ENSG00000175567	UCP2	108.998	-0.0626509	7.87573	0.00501027	0.81557
ENSG00000140675	SLC5A2	33.565	-0.0306822	7.8555	0.00506662	0.81557
ENSG00000134897	BIVM	639.34	0.0136451	7.81856	0.00517124	0.81557
ENSG00000127022	CANX	23375.2	0.0177163	7.79038	0.00525251	0.81557
ENSG00000188869	TMC3	40.4144	0.134573	7.78848	0.00525805	0.81557
ENSG00000165494	PCF11	837.698	0.0149591	7.75994	0.00534178	0.81557
ENSG00000165949	IFI27	174.556	-0.118778	7.75883	0.00534504	0.81557
ENSG00000101210	EEF1A2	336.412	0.068896	7.74024	0.00540036	0.81557
ENSG00000145050	MANF	3938.92	0.0404894	7.74022	0.00540042	0.81557
ENSG00000170153	RNF150	432.685	-0.0376599	7.73682	0.00541059	0.81557
ENSG00000145526	CDH18	29.3667	-0.053512	7.69456	0.00553874	0.817766
ENSG00000197614	MFAP5	885.834	-0.0721428	7.64539	0.00569176	0.817766
ENSG00000008283	CYB561	736.925	0.0284555	7.62782	0.00574748	0.817766
ENSG00000257732		57.4789	0.0524573	7.62418	0.00575909	0.817766
ENSG00000133794	ARNTL	220.363	0.0173852	7.60636	0.00581627	0.817766
ENSG00000154265	ABCA5	370.4	0.0283486	7.5903	0.00586833	0.817766
ENSG00000121851	POLR3GL	395.27	-0.0116901	7.58865	0.00587369	0.817766
ENSG00000141905	NFIC	7130.06	-0.0116118	7.57223	0.00592743	0.817766
ENSG00000269926		13.6351	-0.0774873	7.54494	0.0060179	0.817766
ENSG00000178882	RFLNA	2363.79	0.0617844	7.52565	0.00608267	0.817766
ENSG00000163162	RNF149	936.533	0.0187498	7.51418	0.00612151	0.817766
ENSG00000134590	RTL8C	6710.85	-0.0169396	7.46673	0.00628495	0.817766
ENSG00000176681	LRRC37A	70.8585	0.0651014	7.43187	0.00640789	0.817766
ENSG00000117242	PINK1-AS	766.811	0.0170721	7.41974	0.00645123	0.817766
ENSG00000102984	ZNF821	135.239	-0.019565	7.41356	0.00647343	0.817766
ENSG00000243742	RPLP0P2	179.476	0.0561148	7.41047	0.00648453	0.817766
ENSG00000121057	AKAP1	577.183	0.0159576	7.40817	0.00649282	0.817766
ENSG00000229619	MBNL1-AS1	412.557	-0.0233242	7.39206	0.00655125	0.817766
ENSG00000129910	CDH15	30.9364	0.0732415	7.39005	0.00655858	0.817766
ENSG00000156510	HKDC1	83.5207	0.0799408	7.38654	0.00657137	0.817766
ENSG00000249684		17.7706	-0.0355424	7.36772	0.0066405	0.817766
ENSG00000141664	ZCCHC2	212.715	0.0201239	7.3507	0.00670366	0.817766
ENSG00000265107	GJA5	21.8728	0.0464093	7.34945	0.00670831	0.817766
ENSG00000115041	KCNIP3	125.415	0.0371946	7.34837	0.00671237	0.817766
ENSG00000169359	SLC33A1	1343.28	0.020106	7.34197	0.0067363	0.817766
ENSG00000270015		102.367	0.0204152	7.32335	0.00680643	0.817766
ENSG00000254539		25.9963	0.0370677	7.3114	0.00685185	0.817766
ENSG00000128228	SDF2L1	723.621	0.0464434	7.30973	0.00685822	0.817766
ENSG00000163207	IVL	20.6384	0.118425	7.29009	0.00693361	0.820631
ENSG00000138735	PDE5A	529.68	-0.0573059	7.26036	0.00704933	0.827662
ENSG00000145936	KCNMB1	16.8928	0.0871571	7.22375	0.00719451	0.827662
ENSG00000028277	POU2F2	2435.27	0.0470658	7.21909	0.00721323	0.827662
ENSG00000182195	LDOC1	2202.64	-0.0186711	7.20971	0.00725101	0.827662
ENSG00000184205	TSPYL2	1791.44	0.0197366	7.20352	0.00727606	0.827662
ENSG00000128656	CHN1	805.507	-0.0329847	7.16496	0.00743413	0.827662
ENSG00000185885	IFITM1	901.784	-0.0657402	7.14837	0.00750322	0.827662
ENSG00000102158	MAGT1	2228.72	0.0217622	7.13899	0.00754257	0.827662
ENSG00000138311	ZNF365	50.0838	-0.0371707	7.12939	0.00758306	0.827662
ENSG00000142188	TMEM50B	624.422	0.0369562	7.12878	0.00758565	0.827662
ENSG00000152284	TCF7L1	1687.91	-0.0232556	7.12811	0.00758846	0.827662
ENSG00000105127	AKAP8	843.879	0.0104119	7.10996	0.0076657	0.827662
ENSG00000115648	MLPH	358.075	0.0434221	7.08379	0.00777845	0.827662
ENSG00000128606	LRRC17	1379.81	-0.0611326	7.07034	0.00783702	0.827662
ENSG00000270069	MIR222HG	163.387	0.0423206	7.06738	0.00785001	0.827662
ENSG00000108179	PPIF	2149.03	0.0201949	7.03051	0.00801324	0.827662
ENSG00000021826	CPS1	86.6913	-0.0349927	7.02825	0.00802338	0.827662
ENSG00000136813	ECPAS	3275.92	0.0106112	7.01573	0.00807967	0.827662
ENSG00000086619	ERO1B	148.73	0.0615064	6.98731	0.00820894	0.827662
ENSG00000118965	WDR35	229.496	0.0180107	6.98581	0.00821584	0.827662
ENSG00000198420	TCAF1	4521.19	-0.0206496	6.98552	0.0082172	0.827662
ENSG00000162745	OLFML2B	124.964	-0.04396	6.96562	0.00830906	0.827662
ENSG00000261578		48.4231	0.0478731	6.96143	0.00832854	0.827662
ENSG00000279520		27.6343	0.0365323	6.95378	0.00836422	0.827662
ENSG00000255471	PRSS23-AS1	12.0183	-0.0437387	6.93987	0.00842953	0.827662
ENSG00000102096	PIM2	193.028	0.0190588	6.93345	0.00845984	0.827662
ENSG00000108389	MTMR4	996.367	0.0189136	6.91677	0.00853911	0.827662
ENSG00000240476	LINC00973	21.8142	0.096541	6.90772	0.00858245	0.827662
ENSG00000270049	ATP6V0D1-DT	12.1747	-0.0349215	6.89667	0.00863565	0.827662
ENSG00000197238	H4C11	17.5078	-0.0386226	6.89393	0.00864887	0.827662
ENSG00000182606	TRAK1	1443.99	-0.0155688	6.88219	0.00870587	0.827662
ENSG00000169851	PCDH7	1289.05	-0.0366169	6.87859	0.00872343	0.827662
ENSG00000103202	NME4	4908.3	-0.0162563	6.87051	0.00876298	0.827662
ENSG00000140025	EFCAB11	83.8318	-0.0177459	6.85864	0.00882138	0.827662
ENSG00000167004	PDIA3	31754.1	0.0194349	6.85647	0.0088321	0.827662
ENSG00000138496	PARP9	426.278	-0.0359545	6.85127	0.00885782	0.827662
ENSG00000165795	NDRG2	78.8038	0.0493618	6.80434	0.00909364	0.844757
ENSG00000259706	HSP90B2P	10.7447	0.0428769	6.77759	0.00923095	0.849998
ENSG00000197157	SND1	10972.8	0.00836715	6.76058	0.00931936	0.849998
ENSG00000071537	SEL1L	5235.54	0.0287393	6.74945	0.00937764	0.849998
ENSG00000080709	KCNN2	226.949	-0.0616971	6.74376	0.00940759	0.849998
ENSG00000213626	LBH	806.274	-0.0412538	6.73486	0.00945467	0.849998
ENSG00000231298	MANCR	12.8608	0.0691006	6.72584	0.00950259	0.849998
ENSG00000119523	ALG2	1140.56	0.0119439	6.72212	0.00952244	0.849998
ENSG00000196876	SCN8A	1408.67	0.0198561	6.6789	0.00975609	0.851851
ENSG00000242689	CNTF	11.4388	0.0396781	6.67625	0.00977062	0.851851
ENSG00000143553	SNAPIN	487.97	-0.0118875	6.6664	0.00982472	0.851851
ENSG00000172789	HOXC5	28.6718	-0.0542524	6.65915	0.00986477	0.851851
ENSG00000198561	CTNND1	5297.9	-0.012812	6.64874	0.00992262	0.851851
ENSG00000185710	SMG1P4	10.273	-0.120584	6.64813	0.00992598	0.851851
ENSG00000235609		71.3158	0.0316717	6.64205	0.00995991	0.851851
ENSG00000100353	EIF3D	4797.06	0.00903216	6.6403	0.00996972	0.851851
ENSG00000147130	ZMYM3	1094.13	-0.0121101	6.62674	0.0100459	0.853794
ENSG00000189298	ZKSCAN3	110.884	-0.0112653	6.61031	0.010139	0.854036
ENSG00000109184	DCUN1D4	688.117	0.0129596	6.60739	0.0101556	0.854036
ENSG00000256028		104.517	0.0327624	6.5942	0.0102312	0.855884
ENSG00000040633	PHF23	1796.5	0.00825375	6.5804	0.0103107	0.858047
ENSG00000271344		21.1273	0.0414518	6.55256	0.0104733	0.859619
ENSG00000260300		12.5163	-0.0360074	6.55171	0.0104783	0.859619
ENSG00000188522	FAM83G	1280.87	0.0166136	6.54079	0.0105429	0.859619
ENSG00000137502	RAB30	235.725	-0.0269298	6.53396	0.0105834	0.859619
ENSG00000124875	CXCL6	630.17	0.0961786	6.5314	0.0105986	0.859619
ENSG00000139318	DUSP6	705.705	0.0413961	6.50944	0.0107303	0.865345
ENSG00000273145		23.501	-0.0280271	6.50163	0.0107775	0.865345
ENSG00000106733	NMRK1	294.097	0.0229803	6.489	0.0108544	0.867161
ENSG00000042429	MED17	561.178	0.00951632	6.47209	0.0109582	0.871092
ENSG00000249853	HS3ST5	16.1505	0.0674246	6.44959	0.0110978	0.873478
ENSG00000189001	SBSN	46.085	0.0727745	6.44633	0.0111181	0.873478
ENSG00000115306	SPTBN1	15649	-0.0191314	6.44091	0.0111522	0.873478
ENSG00000184117	NIPSNAP1	1567.4	-0.0152385	6.42263	0.0112675	0.875357
ENSG00000213366	GSTM2	894.626	-0.0170947	6.40692	0.0113677	0.875357
ENSG00000165714	BORCS5	139.07	-0.0126832	6.40297	0.011393	0.875357
ENSG00000167747	C19orf48	730.014	0.0186109	6.39029	0.0114746	0.875357
ENSG00000082497	SERTAD4	224.964	-0.0467523	6.38811	0.0114887	0.875357
ENSG00000140403	DNAJA4	85.2434	0.038902	6.38562	0.0115049	0.875357
ENSG00000260448	LCMT1-AS1	11.0148	-0.03374	6.34398	0.0117781	0.891895
ENSG00000142089	IFITM3	17318.3	-0.0227246	6.32603	0.0118978	0.892333
ENSG00000110442	COMMD9	907.461	-0.0113814	6.3119	0.011993	0.892333
ENSG00000271533		61.3889	0.0267737	6.31145	0.0119961	0.892333
ENSG00000168906	MAT2A	4315.01	0.0123061	6.30898	0.0120128	0.892333
ENSG00000163814	CDCP1	1133.44	0.0789109	6.29826	0.0120856	0.892333
ENSG00000164054	SHISA5	6343.71	-0.0106726	6.28304	0.0121899	0.892333
ENSG00000127954	STEAP4	24.8898	-0.0777588	6.27497	0.0122455	0.892333
ENSG00000139163	ETNK1	725.245	0.0214024	6.27265	0.0122615	0.892333
ENSG00000106610	STAG3L4	253.697	-0.0182553	6.26262	0.0123312	0.892333
ENSG00000169914	OTUD3	373.937	0.0153134	6.26102	0.0123423	0.892333
ENSG00000174348	PODN	381.482	-0.0989753	6.22545	0.0125927	0.902253
ENSG00000258791	LINC00520	14.6975	0.0802703	6.22441	0.0126001	0.902253
ENSG00000083635	NUFIP1	295.167	-0.00944941	6.21756	0.0126489	0.902253
ENSG00000100906	NFKBIA	1254.06	-0.0331664	6.17854	0.0129309	0.91101
ENSG00000236393		44.6784	0.0341305	6.17507	0.0129563	0.91101
ENSG00000126709	IFI6	2346.08	-0.07143	6.17358	0.0129672	0.91101
ENSG00000123146	ADGRE5	1565.79	0.0339186	6.1685	0.0130045	0.91101
ENSG00000259436		25.2737	0.0567655	6.1483	0.0131538	0.91101
ENSG00000196975	ANXA4	1746.13	-0.0118349	6.14059	0.0132113	0.91101
ENSG00000225361	PPP1R26-AS1	42.0747	0.0288483	6.13758	0.0132339	0.91101
ENSG00000142405	NLRP12	10.0667	0.0335223	6.13174	0.0132776	0.91101
ENSG00000109063	MYH3	67.5841	-0.0475502	6.12727	0.0133112	0.91101
ENSG00000204272	NBDY	743.852	-0.0126298	6.11301	0.0134191	0.91101
ENSG00000177303	CASKIN2	790.828	-0.00981483	6.10828	0.013455	0.91101
ENSG00000011295	TTC19	529.994	0.0118799	6.10816	0.0134559	0.91101
ENSG00000267328		93.9044	-0.0566633	6.09239	0.0135765	0.911492
ENSG00000261428		11.8168	0.0340262	6.09231	0.0135771	0.911492
ENSG00000134109	EDEM1	2861.71	0.0214106	6.06976	0.0137515	0.914391
ENSG00000279159		32.9128	0.0228383	6.06528	0.0137865	0.914391
ENSG00000253305	PCDHGB6	196.562	-0.0408779	6.06458	0.013792	0.914391
ENSG00000081026	MAGI3	207.815	-0.0147893	6.04779	0.0139237	0.917395
ENSG00000120875	DUSP4	367.142	0.054788	6.0377	0.0140035	0.917395
ENSG00000261542		12.5379	0.0345902	6.0276	0.0140838	0.917395
ENSG00000171490	RSL1D1	3132.8	0.00901244	6.02661	0.0140918	0.917395
ENSG00000168528	SERINC2	1483.78	-0.0379098	6.00162	0.0142927	0.917395
ENSG00000067601	PMS2P4	21.7924	-0.0309424	5.99528	0.0143442	0.917395
ENSG00000184702	SEPTIN5	502.054	0.043122	5.99276	0.0143647	0.917395
ENSG00000197208	SLC22A4	170.321	0.0274542	5.98454	0.0144318	0.917395
ENSG00000184677	ZBTB40	917.883	0.0139599	5.9691	0.0145587	0.917395
ENSG00000002834	LASP1	20701.3	-0.0150814	5.96806	0.0145673	0.917395
ENSG00000175931	UBE2O	1104.89	0.00926886	5.96249	0.0146134	0.917395
ENSG00000255234	CCDC90B-AS1	12.8101	0.0378207	5.96001	0.014634	0.917395
ENSG00000143870	PDIA6	14910.7	0.0199921	5.94244	0.0147806	0.917395
ENSG00000270074		71.0007	-0.0288688	5.94099	0.0147927	0.917395
ENSG00000236333	TRHDE-AS1	269.903	-0.0391048	5.93373	0.0148538	0.917395
ENSG00000090520	DNAJB11	3744.31	0.0263775	5.93172	0.0148707	0.917395
ENSG00000196502	SULT1A1	50.7156	-0.0549827	5.92485	0.0149288	0.917395
ENSG00000234771	SLC25A25-AS1	188.313	0.0355376	5.91802	0.0149868	0.917395
ENSG00000132823	OSER1	649.788	0.0162306	5.90887	0.0150649	0.917395
ENSG00000184983	NDUFA6	1005.74	-0.0152022	5.90753	0.0150763	0.917395
ENSG00000031081	ARHGAP31	1001.27	-0.0154743	5.9043	0.0151039	0.917395
ENSG00000151694	ADAM17	1397.1	0.0176939	5.90397	0.0151068	0.917395
ENSG00000269243		11.708	-0.0365721	5.89803	0.0151579	0.917395
ENSG00000173077	DELEC1	10.715	-0.0158299	5.87948	0.0153183	0.919169
ENSG00000185615	PDIA2	32.5755	0.0678657	5.87397	0.0153664	0.919169
ENSG00000168734	PKIG	1044.48	-0.0162288	5.85806	0.0155059	0.919169
ENSG00000109511	ANXA10	115.585	0.0686531	5.85747	0.0155111	0.919169
ENSG00000066855	MTFR1	466.634	0.0165245	5.85596	0.0155244	0.919169
ENSG00000121904	CSMD2	692.094	0.0351066	5.84474	0.0156237	0.919169
ENSG00000140961	OSGIN1	633.989	0.0474072	5.82536	0.0157968	0.919169
ENSG00000136928	GABBR2	22.2162	0.0949043	5.81802	0.0158627	0.919169
ENSG00000154370	TRIM11	1057.12	0.01089	5.81721	0.0158701	0.919169
ENSG00000171729	TMEM51	381.202	0.0235887	5.81551	0.0158854	0.919169
ENSG00000280341		17.9336	0.0315665	5.80879	0.0159462	0.919169
ENSG00000164823	OSGIN2	612.886	0.0300961	5.80845	0.0159493	0.919169
ENSG00000130303	BST2	500.494	-0.0900649	5.79315	0.0160887	0.919169
ENSG00000269968		433.247	-0.0260629	5.78588	0.0161554	0.919169
ENSG00000138741	TRPC3	15.371	0.0447515	5.77873	0.0162213	0.919169
ENSG00000269352	PTOV1-AS2	73.8572	0.0252666	5.76606	0.0163387	0.919169
ENSG00000173918	C1QTNF1	2043.04	0.0510724	5.76593	0.0163398	0.919169
ENSG00000185507	IRF7	279.509	-0.0339487	5.76037	0.0163917	0.919169
ENSG00000256349		10.1479	0.0774563	5.75966	0.0163983	0.919169
ENSG00000185803	SLC52A2	2847.66	0.0150069	5.74934	0.0164949	0.919169
ENSG00000163293	NIPAL1	69.2656	0.0350729	5.74742	0.0165129	0.919169
ENSG00000140443	IGF1R	2174.44	-0.015786	5.73954	0.0165871	0.919169
ENSG00000005059	MCUB	138.848	-0.0272403	5.7351	0.0166291	0.919169
ENSG00000166562	SEC11C	806.091	0.0256487	5.73174	0.016661	0.919169
ENSG00000237499	WAKMAR2	10.298	0.0435723	5.72322	0.016742	0.919169
ENSG00000090924	PLEKHG2	1917.55	-0.0117142	5.72074	0.0167656	0.919169
ENSG00000107201	DDX58	337.248	-0.0369795	5.70664	0.0169009	0.919169
ENSG00000134779	TPGS2	2630.21	-0.0152859	5.70148	0.0169507	0.919169
ENSG00000155760	FZD7	2032.33	-0.0269309	5.68814	0.0170799	0.919169
ENSG00000265784		11.501	-0.0558358	5.66506	0.0173061	0.919169
ENSG00000101019	UQCC1	824.221	0.0118964	5.65802	0.0173757	0.919169
ENSG00000110697	PITPNM1	1499.77	0.0155064	5.65541	0.0174017	0.919169
ENSG00000172936	MYD88	1007.71	-0.0108775	5.64276	0.0175276	0.919169
ENSG00000140853	NLRC5	585.561	-0.020806	5.63874	0.0175678	0.919169
ENSG00000279473		12.1021	-0.0349744	5.63814	0.0175739	0.919169
ENSG00000177363	LRRN4CL	124.495	-0.0465499	5.63744	0.0175808	0.919169
ENSG00000110203	FOLR3	51.9481	0.0769592	5.63712	0.0175841	0.919169
ENSG00000185418	TARS3	270.4	0.0131183	5.6289	0.0176668	0.919169
ENSG00000185745	IFIT1	585.906	-0.0670389	5.62878	0.0176679	0.919169
ENSG00000172375	C2CD2L	816.619	0.0186619	5.62857	0.0176701	0.919169
ENSG00000281398	SNHG4	68.8075	0.0258893	5.61434	0.0178141	0.919169
ENSG00000120075	HOXB5	139.674	-0.0462192	5.61046	0.0178536	0.919169
ENSG00000251201	TMED7-TICAM2	381.742	0.0257255	5.60365	0.0179231	0.919169
ENSG00000262580		124.459	0.0415966	5.60153	0.0179448	0.919169
ENSG00000115009	CCL20	33.4668	0.0899686	5.59552	0.0180065	0.919169
ENSG00000161647	MPP3	208.701	0.0178847	5.59209	0.0180418	0.919169
ENSG00000148300	REXO4	821.422	0.00916446	5.58961	0.0180673	0.919169
ENSG00000204946	ZNF783	402.457	0.0152259	5.57933	0.0181736	0.919169
ENSG00000272462	LINC02980	95.8089	-0.0137724	5.57489	0.0182198	0.919169
ENSG00000213920	MDP1	62.8221	-0.0273451	5.5735	0.0182343	0.919169
ENSG00000105617	LENG1	232.707	-0.0145375	5.56769	0.0182949	0.919169
ENSG00000117594	HSD11B1	51.0203	0.116299	5.56321	0.0183418	0.919169
ENSG00000167216	KATNAL2	26.8939	-0.0296732	5.56213	0.0183531	0.919169
ENSG00000163528	CHCHD4	144.055	0.0127528	5.56106	0.0183643	0.919169
ENSG00000139597	N4BP2L1	31.7541	0.0388612	5.55893	0.0183867	0.919169
ENSG00000162413	KLHL21	2637.71	0.017512	5.55623	0.018415	0.919169
ENSG00000223768	LINC00205	89.7344	0.0191262	5.54351	0.0185493	0.919169
ENSG00000196139	AKR1C3	16.376	-0.0759493	5.54106	0.0185754	0.919169
ENSG00000180353	HCLS1	132.366	0.0700972	5.5405	0.0185813	0.919169
ENSG00000169826	CSGALNACT2	1087.56	0.0235212	5.5328	0.0186632	0.920373
ENSG00000171522	PTGER4	62.9867	-0.0526757	5.51411	0.0188637	0.925577
ENSG00000167842	MIS12	208.575	0.0208457	5.50988	0.0189093	0.925577
ENSG00000162706	CADM3	67.0393	0.0277135	5.49666	0.0190528	0.925577
ENSG00000152601	MBNL1	3973.34	-0.0177828	5.49486	0.0190725	0.925577
ENSG00000159840	ZYX	22038.5	-0.0142265	5.47886	0.0192479	0.925577
ENSG00000185236	RAB11B	2477.62	-0.00997177	5.47197	0.0193238	0.925577
ENSG00000203761	MSTO2P	80.1882	0.0375446	5.46684	0.0193807	0.925577
ENSG00000258232		33.4113	-0.0437222	5.4645	0.0194066	0.925577
ENSG00000176749	CDK5R1	63.1198	0.0206041	5.44631	0.0196097	0.925577
ENSG00000142765	SYTL1	59.5563	0.0255124	5.44031	0.0196771	0.925577
ENSG00000132680	KHDC4	1014.9	0.0128616	5.43843	0.0196984	0.925577
ENSG00000008441	NFIX	5319.41	-0.0135164	5.43246	0.0197658	0.925577
ENSG00000120742	SERP1	3198.29	0.0124701	5.43059	0.019787	0.925577
ENSG00000163607	GTPBP8	212.63	-0.0102709	5.42982	0.0197957	0.925577
ENSG00000103111	MON1B	1317.45	0.0110335	5.42938	0.0198007	0.925577
ENSG00000105270	CLIP3	4554.85	-0.0143532	5.42486	0.019852	0.925577
ENSG00000197217	ENTPD4	2591.87	0.0132802	5.42474	0.0198534	0.925577
ENSG00000159314	ARHGAP27	156.902	0.0259706	5.41675	0.0199445	0.925577
ENSG00000241956	LINC03000	103.015	-0.0210239	5.41409	0.0199749	0.925577
ENSG00000138303	ASCC1	416.573	-0.00852668	5.41385	0.0199776	0.925577
ENSG00000140319	SRP14	5835.46	-0.00962782	5.4131	0.0199862	0.925577
ENSG00000170043	TRAPPC1	3189.57	-0.0134814	5.40813	0.0200432	0.925577
ENSG00000203706	SERTAD4-AS1	116.923	-0.0353589	5.39921	0.0201459	0.925817
ENSG00000249592	PCGF3-AS1	31.0576	0.0305076	5.39762	0.0201643	0.925817
ENSG00000041353	RAB27B	425.927	0.0552272	5.38614	0.0202973	0.926062
ENSG00000072062	PRKACA	2976.46	-0.0118159	5.38355	0.0203275	0.926062
ENSG00000163431	LMOD1	2069.02	-0.0367555	5.38218	0.0203435	0.926062
ENSG00000077549	CAPZB	7701.99	-0.010237	5.36896	0.0204982	0.92878
ENSG00000079308	TNS1	9824.95	-0.0223614	5.35565	0.0206553	0.92878
ENSG00000054965	FAM168A	1266.42	-0.0089498	5.35105	0.0207098	0.92878
ENSG00000134070	IRAK2	290.179	0.0368625	5.35081	0.0207126	0.92878
ENSG00000230084	ZBTB47-AS1	9.90526	-0.0315395	5.3502	0.0207199	0.92878
ENSG00000240821	RPL9P25	15.1572	-0.0531663	5.3475	0.0207519	0.92878
ENSG00000139083	ETV6	1298.59	-0.0153714	5.32136	0.0210656	0.931849
ENSG00000004776	HSPB6	12126	-0.0328901	5.32057	0.0210751	0.931849
ENSG00000259024	TVP23C-CDRT4	336.196	0.026634	5.31863	0.0210986	0.931849
ENSG00000174136	RGMB	2731.13	0.0376119	5.3182	0.0211039	0.931849
ENSG00000105989	WNT2	81.9684	-0.0916186	5.31751	0.0211121	0.931849
ENSG00000174137	FAM53A	95.0742	0.0182857	5.31028	0.0211999	0.933146
ENSG00000255526	NEDD8-MDP1	38.3272	-0.0453519	5.29826	0.0213467	0.936371
ENSG00000171914	TLN2	1075.77	-0.0165606	5.2947	0.0213904	0.936371
ENSG00000265401		159.026	-0.0276112	5.28484	0.0215119	0.93903
ENSG00000137198	GMPR	436.494	-0.0312747	5.2706	0.0216885	0.93903
ENSG00000242265	PEG10	1817.73	-0.0357383	5.26813	0.0217193	0.93903
ENSG00000228672	PROB1	62.6595	0.0285184	5.26657	0.0217389	0.93903
ENSG00000273154		162.057	0.0242157	5.26608	0.021745	0.93903
ENSG00000140859	KIFC3	2970.66	0.0138393	5.25186	0.0219234	0.939264
ENSG00000198805	PNP	783.393	0.027521	5.25101	0.021934	0.939264
ENSG00000122035	RASL11A	31.8231	-0.0443238	5.25034	0.0219425	0.939264
ENSG00000166073	GPR176	4164.35	0.0146551	5.24643	0.0219918	0.939264
ENSG00000104228	TRIM35	707.203	0.00876267	5.24196	0.0220484	0.939264
ENSG00000083097	DOP1A	345.433	-0.0154887	5.23765	0.0221031	0.939264
ENSG00000131171	SH3BGRL	1831.29	-0.0127599	5.23023	0.0221976	0.939313
ENSG00000268043	NBPF12	535.703	0.0151183	5.21769	0.0223582	0.939313
ENSG00000146966	DENND2A	17.7143	-0.0575363	5.20778	0.022486	0.939313
ENSG00000254887	POU2F2-AS1	31.0805	0.0447435	5.20199	0.0225611	0.939313
ENSG00000141753	IGFBP4	21446.3	-0.0225069	5.20195	0.0225615	0.939313
ENSG00000106089	STX1A	367.826	0.0218044	5.19848	0.0226067	0.939313
ENSG00000163902	RPN1	11632.3	0.0139083	5.19827	0.0226094	0.939313
ENSG00000197976	AKAP17A	1829.32	0.0136576	5.19036	0.0227125	0.939313
ENSG00000138604	GLCE	1120.35	0.0200969	5.18957	0.0227228	0.939313
ENSG00000111863	ADTRP	20.6254	0.0426266	5.18632	0.0227654	0.939313
ENSG00000270696		88.5403	-0.0158412	5.17638	0.022896	0.939313
ENSG00000156711	MAPK13	402.323	0.0268821	5.16901	0.0229933	0.939313
ENSG00000115525	ST3GAL5	756.263	-0.035036	5.16821	0.023004	0.939313
ENSG00000204442	NALF1	488.045	0.0207203	5.16773	0.0230103	0.939313
ENSG00000212719	LINC02693	973	0.0156902	5.16556	0.0230391	0.939313
ENSG00000279872		31.0943	-0.0634509	5.16263	0.0230779	0.939313
ENSG00000223949	ROR1-AS1	40.4598	0.0379354	5.15467	0.023184	0.939313
ENSG00000186594	MIR22HG	2280.5	0.0167553	5.12546	0.0235774	0.939313
ENSG00000133026	MYH10	9847.1	-0.0213826	5.12178	0.0236273	0.939313
ENSG00000197808	ZNF461	91.3762	0.0142523	5.12162	0.0236295	0.939313
ENSG00000167244	IGF2	606.687	-0.0779575	5.11197	0.0237613	0.939313
ENSG00000013293	SLC7A14	843.67	0.0656288	5.11192	0.023762	0.939313
ENSG00000072849	DERL2	1087.01	0.0173423	5.11106	0.0237737	0.939313
ENSG00000215068	ANXA2R-AS1	35.551	-0.0253494	5.10867	0.0238066	0.939313
ENSG00000116128	BCL9	648.506	-0.0130656	5.10676	0.0238329	0.939313
ENSG00000272667		55.6173	-0.0155429	5.10089	0.0239136	0.939313
ENSG00000169282	KCNAB1	11.7674	-0.124546	5.08751	0.0240987	0.939313
ENSG00000205002	AARD	34.3497	-0.0415708	5.08454	0.0241401	0.939313
ENSG00000260603		41.5614	-0.0308516	5.08258	0.0241674	0.939313
ENSG00000156042	CFAP70	36.9891	0.0405262	5.07936	0.0242123	0.939313
ENSG00000126226	PCID2	651.132	0.0109177	5.07901	0.0242172	0.939313
ENSG00000272273	IER3-AS1	20.0468	-0.0259157	5.07339	0.0242959	0.939313
ENSG00000134884	ARGLU1	1718.26	0.0100398	5.07177	0.0243185	0.939313
ENSG00000239332	LINC01119	10.3048	-0.0391249	5.07022	0.0243403	0.939313
ENSG00000197959	DNM3	21.296	-0.0438112	5.06191	0.0244572	0.939313
ENSG00000197702	PARVA	6141.35	-0.00878455	5.05379	0.0245722	0.939313
ENSG00000233913	RPL10P9	212.717	0.0690707	5.05048	0.0246191	0.939313
ENSG00000149187	CELF1	1931.09	0.00746558	5.04971	0.0246301	0.939313
ENSG00000052841	TTC17	2085.31	0.0210952	5.04863	0.0246455	0.939313
ENSG00000261884		68.6952	0.0219118	5.04428	0.0247073	0.939313
ENSG00000161267	BDH1	152.854	0.0219619	5.04379	0.0247144	0.939313
ENSG00000175029	CTBP2	1906.61	0.0122214	5.03716	0.0248092	0.939313
ENSG00000214940	NPIPA8	121.703	-0.108736	5.03121	0.0248945	0.939313
ENSG00000078319	PMS2P1	82.2577	-0.0166797	5.03087	0.0248994	0.939313
ENSG00000161558	TMEM143	159.058	-0.0153816	5.03068	0.0249021	0.939313
ENSG00000163013	FBXO41	231.433	0.0222653	5.02942	0.0249203	0.939313
ENSG00000143669	LYST	569.75	0.0306283	5.01794	0.0250861	0.939313
ENSG00000157617	C2CD2	720.394	0.0177698	5.01254	0.0251643	0.939313
ENSG00000173581	CCDC106	482.05	-0.0162296	5.01136	0.0251815	0.939313
ENSG00000125779	PANK2	652.302	0.00732756	5.00773	0.0252343	0.939313
ENSG00000278867		11.8241	0.039035	5.00157	0.0253244	0.939313
ENSG00000055483	USP36	1574.05	0.0109982	4.99487	0.0254226	0.939313
ENSG00000178201	VN1R1	15.0504	0.0344663	4.98162	0.0256179	0.939313
ENSG00000179218	CALR	70704.6	0.0187934	4.98109	0.0256259	0.939313
ENSG00000125462	MIR9-1HG	13.8349	0.0297711	4.97888	0.0256586	0.939313
ENSG00000253746		12.0362	0.0443936	4.97694	0.0256874	0.939313
ENSG00000106819	ASPN	39.4938	-0.084424	4.97679	0.0256897	0.939313
ENSG00000264112		386.105	0.0249218	4.97541	0.0257101	0.939313
ENSG00000117586	TNFSF4	158.446	-0.0503679	4.9656	0.0258564	0.939313
ENSG00000168386	FILIP1L	3040.03	-0.0311735	4.96313	0.0258933	0.939313
ENSG00000138028	CGREF1	204.072	0.0388195	4.95828	0.025966	0.939313
ENSG00000173163	COMMD1	469.283	-0.0119509	4.95785	0.0259725	0.939313
ENSG00000182010	RTKN2	45.1158	-0.0310182	4.9572	0.0259822	0.939313
ENSG00000088448	ANKRD10	738.138	0.0309811	4.95131	0.0260708	0.939313
ENSG00000120949	TNFRSF8	15.4285	0.0576583	4.94934	0.0261007	0.939313
ENSG00000184254	ALDH1A3	4171.76	0.0476011	4.94033	0.0262371	0.939313
ENSG00000187942	LDLRAD2	184.911	-0.0247674	4.93889	0.0262588	0.939313
ENSG00000237017	PRPF31-AS1	10.0014	0.0477679	4.93866	0.0262625	0.939313
ENSG00000154263	ABCA10	25.6873	0.0335358	4.93236	0.0263583	0.939313
ENSG00000077232	DNAJC10	5388.76	0.0148506	4.92598	0.0264558	0.939313
ENSG00000185201	IFITM2	4422.77	-0.0292284	4.92415	0.0264838	0.939313
ENSG00000129646	QRICH2	141.011	0.0423605	4.91989	0.0265493	0.939313
ENSG00000198353	HOXC4	259.257	-0.0271962	4.91979	0.0265507	0.939313
ENSG00000138449	SLC40A1	408.043	-0.0622025	4.91522	0.0266211	0.939313
ENSG00000197375	SLC22A5	259.394	0.0193881	4.91156	0.0266776	0.939313
ENSG00000184979	USP18	93.5523	-0.0462894	4.91009	0.0267003	0.939313
ENSG00000163527	STT3B	4581.92	0.0142462	4.90886	0.0267193	0.939313
ENSG00000196757	ZNF700	189.84	0.0132692	4.90794	0.0267336	0.939313
ENSG00000142784	WDTC1	1698.8	-0.00903717	4.90564	0.0267691	0.939313
ENSG00000176170	SPHK1	1692.07	0.0285801	4.90303	0.0268097	0.939313
ENSG00000197063	MAFG	2153.84	0.0182863	4.89709	0.026902	0.939313
ENSG00000135373	EHF	11.4822	0.140326	4.89559	0.0269253	0.939313
ENSG00000223396	RPS10P7	13.9404	0.0320989	4.89186	0.0269836	0.939313
ENSG00000262903	CTNS-AS1	41.1986	-0.0245139	4.88218	0.0271354	0.940452
ENSG00000164638	SLC29A4	304.713	-0.0198031	4.87857	0.0271921	0.940452
ENSG00000120860	WASHC3	602.105	-0.0112186	4.87852	0.0271929	0.940452
ENSG00000228474	OST4	4972.3	-0.0117924	4.8628	0.0274417	0.947005
ENSG00000214717	ZBED1	1028.88	-0.0107311	4.8493	0.0276573	0.949741
ENSG00000216775		41.9019	-0.0275417	4.84612	0.0277084	0.949741
ENSG00000155256	ZFYVE27	928.71	0.0150363	4.84419	0.0277394	0.949741
ENSG00000135597	REPS1	597.761	0.0135645	4.84299	0.0277587	0.949741
ENSG00000258315	C17orf49	578.403	-0.0186882	4.83766	0.0278446	0.950643
ENSG00000185022	MAFF	1198.12	0.0246992	4.82668	0.0280226	0.953017
ENSG00000256087	ZNF432	288.011	0.0194096	4.8228	0.0280857	0.953017
ENSG00000258839	MC1R	202.259	0.0218596	4.82235	0.0280931	0.953017
ENSG00000179262	RAD23A	2909.08	-0.0134565	4.81536	0.0282072	0.954762
ENSG00000224411	HSP90AA2P	26.0633	-0.0342309	4.81189	0.028264	0.954762
ENSG00000178662	CSRNP3	50.014	-0.0375458	4.80367	0.0283991	0.957037
ENSG00000163739	CXCL1	1860.35	0.094474	4.79203	0.0285917	0.957037
ENSG00000128268	MGAT3	39.0743	0.0677582	4.78962	0.0286317	0.957037
ENSG00000101335	MYL9	40579.2	-0.0168839	4.78344	0.0287347	0.957037
ENSG00000090061	CCNK	2314.03	-0.00825741	4.7809	0.028777	0.957037
ENSG00000197448	GSTK1	1693.26	-0.00813719	4.77983	0.028795	0.957037
ENSG00000279789		41.8289	0.0309645	4.77596	0.0288598	0.957037
ENSG00000123496	IL13RA2	25.3753	0.067801	4.77327	0.0289049	0.957037
ENSG00000277702		11.6596	-0.0363881	4.77167	0.0289318	0.957037
ENSG00000214401	KANSL1-AS1	17.3848	0.0535042	4.77038	0.0289534	0.957037
ENSG00000162430	SELENON	7603.83	-0.00980355	4.76819	0.0289902	0.957037
ENSG00000106992	AK1	1295.65	-0.0123739	4.76189	0.0290966	0.958566
ENSG00000125534	PPDPF	8229.81	-0.0193434	4.73853	0.0294943	0.961709
ENSG00000142039	CCDC97	763.332	-0.00927455	4.73824	0.0294992	0.961709
ENSG00000165995	CACNB2	10.5096	-0.062076	4.73645	0.02953	0.961709
ENSG00000227345	PARG	612.372	0.0116357	4.7343	0.0295668	0.961709
ENSG00000172137	CALB2	123.557	0.0662962	4.73188	0.0296084	0.961709
ENSG00000231856		21.7759	-0.0232001	4.73085	0.0296263	0.961709
ENSG00000122547	EEPD1	159.496	-0.0273989	4.72831	0.02967	0.961709
ENSG00000255152	MSH5-SAPCD1	47.3628	0.0394721	4.72811	0.0296735	0.961709
ENSG00000182809	CRIP2	694.212	-0.0410832	4.72333	0.029756	0.962432
ENSG00000151006	PRSS53	187.445	0.0241659	4.71907	0.0298298	0.962871
ENSG00000225595	LINC01623	49.4347	-0.0345646	4.70865	0.0300113	0.965169
ENSG00000151917	BEND6	179.745	-0.0209039	4.70804	0.0300218	0.965169
ENSG00000172428	COPS9	624.767	-0.0112724	4.69757	0.0302053	0.965805
ENSG00000112367	FIG4	638.861	-0.012637	4.68931	0.0303509	0.965805
ENSG00000167157	PRRX2	61.7322	-0.0685659	4.68354	0.0304529	0.965805
ENSG00000125503	PPP1R12C	4326.64	0.0120057	4.6777	0.0305567	0.965805
ENSG00000274718		11.722	0.0388604	4.67704	0.0305684	0.965805
ENSG00000213079	SCAF8	1361.12	-0.00843563	4.67673	0.0305738	0.965805
ENSG00000139344	AMDHD1	31.2715	0.0221147	4.67376	0.0306267	0.965805
ENSG00000189410	SH2D5	509.433	0.0335664	4.67194	0.0306593	0.965805
ENSG00000254531	FLJ20021	107.7	-0.0173541	4.66733	0.0307417	0.965805
ENSG00000047056	WDR37	839.007	0.0139429	4.6622	0.0308336	0.965805
ENSG00000187624	C17orf97	175.773	-0.0330102	4.66181	0.0308407	0.965805
ENSG00000129467	ADCY4	32.4075	0.0718412	4.66105	0.0308544	0.965805
ENSG00000226419	SLC16A1-AS1	196.987	0.017076	4.6601	0.0308715	0.965805
ENSG00000108854	SMURF2	4103.14	0.0308436	4.65918	0.0308879	0.965805
ENSG00000140511	HAPLN3	404.022	-0.0320843	4.64695	0.0311087	0.97081
ENSG00000250397		15.1569	0.0331506	4.64292	0.0311819	0.971199
ENSG00000213066	CEP43	356.503	0.0108781	4.62902	0.0314356	0.971999
ENSG00000122691	TWIST1	666.451	-0.0268321	4.62866	0.0314421	0.971999
ENSG00000189320	FAM180A	33.7929	-0.0646238	4.62549	0.0315002	0.971999
ENSG00000164654	MIOS	309.946	0.0108438	4.62482	0.0315125	0.971999
ENSG00000072952	IRAG1	927.958	-0.0337713	4.62243	0.0315565	0.971999
ENSG00000183605	SFXN4	234.625	0.01404	4.62155	0.0315726	0.971999
ENSG00000115129	TP53I3	1159.64	-0.0168864	4.61373	0.0317171	0.972252
ENSG00000249476		21.7413	0.0338998	4.61235	0.0317426	0.972252
ENSG00000274471		34.1705	0.0307745	4.61122	0.0317634	0.972252
ENSG00000133134	BEX2	63.6584	0.0650876	4.60536	0.0318721	0.97287
ENSG00000275793	RIMBP3	20.218	0.0366073	4.60357	0.0319054	0.97287
ENSG00000272398	CD24	25.8716	-0.075211	4.59734	0.0320217	0.974556
ENSG00000111450	STX2	1230.3	0.00933834	4.58784	0.0321995	0.978105
ENSG00000101751	POLI	375.621	0.0160175	4.57877	0.0323704	0.978414
ENSG00000100568	VTI1B	1832.72	-0.00785093	4.57425	0.032456	0.978414
ENSG00000259959		44.6653	0.0199537	4.56852	0.0325647	0.978414
ENSG00000120910	PPP3CC	566.974	0.0135333	4.55917	0.032743	0.978414
ENSG00000185046	ANKS1B	11.1563	-0.0444782	4.55434	0.0328354	0.978414
ENSG00000181264	TLCD5	392.457	0.0131683	4.5541	0.0328401	0.978414
ENSG00000118363	SPCS2	1357.12	0.0121977	4.55093	0.032901	0.978414
ENSG00000182685	BRICD5	63.6767	0.0227469	4.54893	0.0329394	0.978414
ENSG00000133874	RNF122	122.47	-0.0210504	4.5479	0.0329591	0.978414
ENSG00000228109	MELTF-AS1	38.5476	0.0254512	4.54785	0.0329602	0.978414
ENSG00000189129	PLAC9	74.8435	-0.0381909	4.54655	0.0329852	0.978414
ENSG00000139531	SUOX	416.336	-0.0133271	4.54653	0.0329856	0.978414
ENSG00000113013	HSPA9	9456.54	0.0133035	4.54111	0.0330902	0.978414
ENSG00000147421	HMBOX1	280.903	0.017289	4.53628	0.0331837	0.978414
ENSG00000182324	KCNJ14	49.1453	0.0275469	4.53496	0.0332093	0.978414
ENSG00000136891	TEX10	686.173	0.0105185	4.53329	0.0332417	0.978414
ENSG00000109971	HSPA8	33943.8	0.0147904	4.52498	0.0334035	0.978414
ENSG00000283224		67.777	-0.042501	4.52202	0.0334613	0.978414
ENSG00000182253	SYNM	869.18	-0.0298562	4.50915	0.033714	0.978414
ENSG00000117143	UAP1	2925.36	0.0234518	4.50907	0.0337155	0.978414
ENSG00000163735	CXCL5	360.333	0.068441	4.50757	0.0337451	0.978414
ENSG00000139289	PHLDA1	3720.95	0.0342235	4.50541	0.0337879	0.978414
ENSG00000244038	DDOST	14126.6	0.0128832	4.50526	0.0337908	0.978414
ENSG00000183621	ZNF438	128.232	0.0162948	4.5037	0.0338216	0.978414
ENSG00000188916	INSYN2A	10.404	-0.0409918	4.49411	0.0340119	0.978414
ENSG00000171608	PIK3CD	785.357	0.018856	4.49161	0.0340617	0.978414
ENSG00000143369	ECM1	3902.25	-0.0284414	4.4896	0.0341017	0.978414
ENSG00000170965	PLAC1	15.7509	-0.0535488	4.48768	0.03414	0.978414
ENSG00000114268	PFKFB4	285.188	0.0220199	4.48702	0.0341532	0.978414
ENSG00000248275	TRIM52-AS1	66.1223	-0.0220335	4.48364	0.0342208	0.978414
ENSG00000131871	SELENOS	1748.78	0.0130512	4.48157	0.0342622	0.978414
ENSG00000144891	AGTR1	123.68	0.0360165	4.47783	0.0343374	0.978414
ENSG00000042286	AIFM2	598.426	0.0173265	4.47725	0.034349	0.978414
ENSG00000269743	SLC25A53	55.1777	-0.0138495	4.47384	0.0344175	0.978414
ENSG00000143382	ADAMTSL4	316.11	-0.0402708	4.47174	0.0344599	0.978414
ENSG00000143624	INTS3	2342.34	0.00983303	4.46915	0.0345121	0.978414
ENSG00000101384	JAG1	449.533	-0.0260197	4.46825	0.0345304	0.978414
ENSG00000189184	PCDH18	719.235	-0.040155	4.46794	0.0345366	0.978414
ENSG00000154122	ANKH	3006.39	-0.0286267	4.46282	0.0346403	0.979345
ENSG00000162804	SNED1	17.169	-0.0570424	4.45558	0.0347873	0.979345
ENSG00000134548	SPX	52.0767	0.0532035	4.45467	0.0348059	0.979345
ENSG00000154608	CEP170P1	20.9547	-0.0461524	4.45425	0.0348146	0.979345
ENSG00000258704	SRP54-AS1	10.0762	-0.0286891	4.44455	0.0350129	0.980184
ENSG00000231074	HCG18	659.041	0.0102653	4.44133	0.0350788	0.980184
ENSG00000260644	HERC2P5	21.4113	-0.0257693	4.43112	0.0352894	0.980184
ENSG00000198920	KIAA0753	432.273	0.00937075	4.43109	0.0352899	0.980184
ENSG00000099785	MARCHF2	630.385	-0.0127683	4.42988	0.0353149	0.980184
ENSG00000165424	ZCCHC24	1491.14	-0.0127773	4.42919	0.0353292	0.980184
ENSG00000134986	NREP	2406.92	-0.0277691	4.42824	0.0353489	0.980184
ENSG00000123843	C4BPB	49.5131	0.0542197	4.42407	0.0354355	0.980184
ENSG00000224424	PRKAR2A-AS1	22.2706	-0.0221796	4.41926	0.0355355	0.980184
ENSG00000140455	USP3	678.28	0.0100165	4.41703	0.035582	0.980184
ENSG00000157110	RBPMS	2670.46	-0.0131694	4.4148	0.0356284	0.980184
ENSG00000117697	NSL1	257.325	-0.0118472	4.41358	0.035654	0.980184
ENSG00000126970	ZC4H2	147.266	-0.0122485	4.40973	0.0357346	0.980184
ENSG00000172403	SYNPO2	5573.16	-0.0359558	4.40868	0.0357564	0.980184
ENSG00000178607	ERN1	881.783	0.0244777	4.40829	0.0357646	0.980184
ENSG00000272750		12.8476	0.0302664	4.39946	0.0359504	0.980609
ENSG00000001084	GCLC	607.925	0.0186125	4.3985	0.0359706	0.980609
ENSG00000181222	POLR2A	7647.77	-0.0132433	4.39779	0.0359855	0.980609
ENSG00000274211	SOCS7	499.481	0.0125442	4.39589	0.0360256	0.980609
ENSG00000083290	ULK2	446.072	0.0169507	4.39078	0.0361338	0.981719
ENSG00000178623	GPR35	26.8692	0.0398571	4.3832	0.0362947	0.981719
ENSG00000139651	ZNF740	663.15	0.0125134	4.37819	0.0364017	0.981719
ENSG00000174871	CNIH2	23.9801	-0.0299539	4.37669	0.0364337	0.981719
ENSG00000188895	MSL1	1974.86	0.00744375	4.37623	0.0364435	0.981719
ENSG00000271303	SRXN1	2140.05	0.0270472	4.3739	0.0364935	0.981719
ENSG00000279443		26.7471	0.0358506	4.37063	0.0365635	0.981719
ENSG00000139644	TMBIM6	12148.7	0.00753697	4.3656	0.0366717	0.981719
ENSG00000108771	DHX58	203.561	-0.0255984	4.36549	0.0366739	0.981719
ENSG00000259366		10.8376	0.0339245	4.36263	0.0367355	0.981719
ENSG00000186111	PIP5K1C	4587.41	-0.00999457	4.36232	0.0367423	0.981719
ENSG00000173786	CNP	3170.12	-0.00811004	4.35529	0.0368941	0.984131
ENSG00000168389	MFSD2A	409.622	0.0190153	4.34564	0.0371039	0.985201
ENSG00000130684	ZNF337	461.185	0.0156166	4.34359	0.0371486	0.985201
ENSG00000175764	TTLL11	98.7729	-0.014546	4.34275	0.0371669	0.985201
ENSG00000133872	SARAF	4867.35	0.013357	4.34141	0.0371962	0.985201
ENSG00000257219	LNCOG	68.8971	0.0482123	4.33427	0.0373525	0.985201
ENSG00000253103	LINC01609	16.0403	-0.0356434	4.33171	0.0374087	0.985201
ENSG00000171723	GPHN	202.106	0.0129924	4.33133	0.0374169	0.985201
ENSG00000103145	HCFC1R1	646.277	-0.0298181	4.32673	0.0375182	0.985201
ENSG00000272888	CHASERR	359.816	-0.014311	4.32382	0.0375824	0.985201
ENSG00000280096		27.8867	0.0768696	4.32293	0.037602	0.985201
ENSG00000104722	NEFM	877.799	0.0780622	4.3191	0.0376868	0.985201
ENSG00000225630	MTND2P28	1719.58	-0.124425	4.31885	0.0376923	0.985201
ENSG00000149289	ZC3H12C	277.669	0.0293758	4.31569	0.0377626	0.985201
ENSG00000177150	FAM210A	221.307	0.0120588	4.31411	0.0377975	0.985201
ENSG00000147459	DOCK5	2819.24	0.0182697	4.30509	0.0379985	0.988828
ENSG00000136982	DSCC1	39.9121	-0.0265651	4.29711	0.0381772	0.989209
ENSG00000212747	RTL8B	739.014	-0.013672	4.29564	0.0382103	0.989209
ENSG00000140265	ZSCAN29	460.005	0.0122532	4.29492	0.0382265	0.989209
ENSG00000134138	MEIS2	1295.11	-0.0224514	4.29216	0.0382884	0.989209
ENSG00000100078	PLA2G3	71.8272	0.051461	4.28372	0.0384791	0.989209
ENSG00000105379	ETFB	973.197	-0.00927687	4.28133	0.0385331	0.989209
ENSG00000267598		14.1155	-0.0340084	4.27885	0.0385895	0.989209
ENSG00000185338	SOCS1	170.527	-0.0316879	4.27615	0.0386508	0.989209
ENSG00000089127	OAS1	54.2097	-0.105241	4.27485	0.0386804	0.989209
ENSG00000180035	ZNF48	228.942	0.0144187	4.27273	0.0387287	0.989209
ENSG00000261716	H2BC20P	108.686	0.0247674	4.26797	0.0388373	0.989209
ENSG00000196588	MRTFA	1621.6	-0.0118162	4.2672	0.0388549	0.989209
ENSG00000196873	CBWD3	466.295	-0.0162154	4.26464	0.0389134	0.989209
ENSG00000162630	B3GALT2	133.362	-0.0500034	4.26363	0.0389367	0.989209
ENSG00000259658	UBE2Q2P13	13.0684	0.0363976	4.2634	0.0389418	0.989209
ENSG00000258017		398.757	-0.0352006	4.25177	0.0392094	0.990084
ENSG00000272410		96.5662	0.0594752	4.2496	0.0392597	0.990084
ENSG00000168291	PDHB	1584.61	-0.0110529	4.24917	0.0392694	0.990084
ENSG00000167332	OR51E2	142.991	-0.0428022	4.24637	0.0393344	0.990084
ENSG00000257337	TNS2-AS1	36.8386	-0.0244806	4.24518	0.039362	0.990084
ENSG00000110011	DNAJC4	609.438	-0.012245	4.24414	0.0393859	0.990084
ENSG00000269374		9.60692	-0.0383531	4.23831	0.0395214	0.990084
ENSG00000166471	TMEM41B	1177.43	0.0180051	4.23387	0.0396249	0.990084
ENSG00000254452		23.8481	-0.0287377	4.23352	0.0396331	0.990084
ENSG00000149634	SPATA25	12.8021	0.0439168	4.22558	0.039819	0.990084
ENSG00000149089	APIP	382.148	0.0147456	4.22329	0.0398727	0.990084
ENSG00000148737	TCF7L2	882.2	-0.0155214	4.22202	0.0399026	0.990084
ENSG00000138347	MYPN	108.345	0.0754817	4.2202	0.0399454	0.990084
ENSG00000065000	AP3D1	8639.95	0.00986738	4.2191	0.0399714	0.990084
ENSG00000224950		23.3782	0.03134	4.21408	0.0400899	0.990084
ENSG00000280184		19.2345	0.0218977	4.21293	0.0401169	0.990084
ENSG00000197930	ERO1A	2852.6	0.0152621	4.2098	0.040191	0.990084
ENSG00000203618	GP1BB	87.9834	0.0587747	4.20822	0.0402285	0.990084
ENSG00000153404	PLEKHG4B	25.1793	-0.0587993	4.20778	0.0402389	0.990084
ENSG00000143995	MEIS1	687.488	-0.020026	4.20398	0.0403293	0.990084
ENSG00000106290	TAF6	1955.33	-0.0105164	4.20306	0.0403512	0.990084
ENSG00000147123	NDUFB11	1227.85	-0.011446	4.20259	0.0403624	0.990084
ENSG00000173153	ESRRA	644.212	0.0105578	4.19841	0.0404619	0.990084
ENSG00000261652	PIERCE2	34.1866	0.0289697	4.19583	0.0405234	0.990084
ENSG00000253893	FAM85B	10.752	-0.035409	4.19201	0.040615	0.990084
ENSG00000109920	FNBP4	1698.71	0.0102052	4.18334	0.0408232	0.990084
ENSG00000143878	RHOB	2879.06	-0.0253067	4.18219	0.0408508	0.990084
ENSG00000126785	RHOJ	846.508	-0.0201713	4.18196	0.0408564	0.990084
ENSG00000129187	DCTD	2299.16	0.00496844	4.18181	0.0408601	0.990084
ENSG00000101347	SAMHD1	702.81	-0.0218112	4.18155	0.0408663	0.990084
ENSG00000164307	ERAP1	1104.18	0.0213955	4.17751	0.0409638	0.990084
ENSG00000214013	GANC	247.443	-0.0104632	4.17679	0.0409813	0.990084
ENSG00000067836	ROGDI	780.139	-0.0180048	4.17514	0.0410211	0.990084
ENSG00000185437	SH3BGR	54.8773	-0.025447	4.17072	0.0411284	0.990137
ENSG00000154928	EPHB1	149.093	0.0429693	4.16882	0.0411744	0.990137
ENSG00000136731	UGGT1	5009.82	0.0115625	4.16739	0.0412092	0.990137
ENSG00000109133	TMEM33	1354.35	0.0099609	4.1618	0.0413455	0.99192
ENSG00000206190	ATP10A	484.624	-0.0360718	4.14858	0.0416693	0.99819
ENSG00000139910	NOVA1	17.7333	-0.0739885	4.14164	0.0418406	0.999424
ENSG00000145681	HAPLN1	3515.1	-0.0673507	4.13988	0.0418841	0.999424
ENSG00000237989	LINC01679	55.1588	0.0286956	4.1389	0.0419085	0.999424
ENSG00000172748	ZNF596	57.9479	0.0151903	4.13554	0.0419916	0.999912
ENSG00000087269	NOP14	1782.19	0.00659694	4.1292	0.0421492	>0.99999
ENSG00000188092	GPR89B	295.143	0.0127034	4.12188	0.042332	>0.99999
ENSG00000249936	RAC1P2	23.0139	-0.134793	4.12099	0.0423544	>0.99999
ENSG00000224877	NDUFAF8	763.803	-0.0103101	4.11203	0.0425792	>0.99999
ENSG00000154832	CXXC1	986.717	0.00983753	4.10949	0.0426433	>0.99999
ENSG00000213071	LPAL2	17.9176	0.0329117	4.10768	0.042689	>0.99999
ENSG00000260735		17.6364	0.0376732	4.10637	0.042722	>0.99999
ENSG00000075624	ACTB	217836	-0.0173282	4.10605	0.0427302	>0.99999
ENSG00000049656	CLPTM1L	3636.52	0.0136574	4.1052	0.0427515	>0.99999
ENSG00000228510		10.3852	0.0489695	4.10448	0.0427698	>0.99999
ENSG00000239704	CDRT4	107.226	-0.0638714	4.10235	0.0428236	>0.99999
ENSG00000266820	KPNA2P3	42.5148	0.0313586	4.08606	0.0432382	>0.99999
ENSG00000057019	DCBLD2	9089.78	0.0355806	4.08466	0.0432741	>0.99999
ENSG00000115365	LANCL1	582.267	-0.0133869	4.08066	0.0433768	>0.99999
ENSG00000178980	SELENOW	2150.52	-0.0181513	4.07756	0.0434565	>0.99999
ENSG00000156958	GALK2	254.221	0.0115491	4.07307	0.0435719	>0.99999
ENSG00000226752	CUTALP	27.6513	0.0266408	4.07132	0.0436171	>0.99999
ENSG00000055130	CUL1	1512.37	0.00553818	4.06505	0.0437794	>0.99999
ENSG00000196417	ZNF765	146.578	0.0115207	4.06478	0.0437865	>0.99999
ENSG00000162512	SDC3	5942.5	-0.0107572	4.06357	0.0438177	>0.99999
ENSG00000198001	IRAK4	619.164	0.0101964	4.0615	0.0438716	>0.99999
ENSG00000274925	ZKSCAN2-DT	25.3258	0.0257063	4.05658	0.0439995	>0.99999
ENSG00000188785	ZNF548	191.362	-0.00908576	4.05104	0.0441442	>0.99999
ENSG00000204923	FBXO48	58.4963	0.0160658	4.04755	0.0442356	>0.99999
ENSG00000228589	SPCS2P4	51.2089	-0.0382001	4.04599	0.0442764	>0.99999
ENSG00000167716	WDR81	1376.5	0.0154221	4.04315	0.0443509	>0.99999
ENSG00000204172	AGAP9	266.669	0.0269582	4.04147	0.0443953	>0.99999
ENSG00000163644	PPM1K	374.764	0.0140055	4.03932	0.0444518	>0.99999
ENSG00000229656	ITGB1-DT	22.793	0.040102	4.03798	0.0444869	>0.99999
ENSG00000148541	FAM13C	11.7845	-0.0416323	4.03447	0.0445796	>0.99999
ENSG00000182325	FBXL6	571.008	0.0194314	4.0303	0.0446901	>0.99999
ENSG00000184206	GOLGA6L4	84.1709	0.0244098	4.02805	0.0447497	>0.99999
ENSG00000155980	KIF5A	40.0325	-0.0413298	4.02508	0.0448286	>0.99999
ENSG00000135424	ITGA7	97.9347	0.067375	4.02085	0.0449411	>0.99999
ENSG00000250138		13.4181	0.0455109	4.01709	0.0450415	>0.99999
ENSG00000171813	PWWP2B	584.286	0.0157783	4.01505	0.0450959	>0.99999
ENSG00000267629		142.431	0.0215199	4.01266	0.0451598	>0.99999
ENSG00000272921		25.5744	-0.0640513	4.01181	0.0451825	>0.99999
ENSG00000233695	GAS6-AS1	28.9627	-0.036076	4.01051	0.0452175	>0.99999
ENSG00000144161	ZC3H8	178.159	0.0105334	4.00754	0.0452972	>0.99999
ENSG00000230606	LINC02969	492.949	0.0259914	4.00539	0.0453551	>0.99999
ENSG00000181982	CCDC149	463.254	0.0143675	3.99955	0.0455123	>0.99999
ENSG00000119013	NDUFB3	742.444	-0.0103959	3.99751	0.0455676	>0.99999
ENSG00000090382	LYZ	19.1294	0.0218301	3.99077	0.04575	>0.99999
ENSG00000185112	FAM43A	2377.61	0.0282517	3.99035	0.0457616	>0.99999
ENSG00000198774	RASSF9	33.4153	-0.0308486	3.98988	0.0457743	>0.99999
ENSG00000105829	BET1	434.145	0.0121898	3.98797	0.0458263	>0.99999
ENSG00000107798	LIPA	4440.16	0.0251412	3.9809	0.046019	>0.99999
ENSG00000085872	CHERP	1683.07	-0.00708047	3.9802	0.046038	>0.99999
ENSG00000250786	SNHG18	691.815	0.0211051	3.97621	0.0461473	>0.99999
ENSG00000166681	BEX3	2559.46	-0.0102249	3.97499	0.0461807	>0.99999
ENSG00000137959	IFI44L	108.104	-0.0776858	3.96926	0.046338	>0.99999
ENSG00000244165	P2RY11	209.771	0.0271577	3.96796	0.046374	>0.99999
ENSG00000120519	SLC10A7	184.488	0.0150826	3.96675	0.0464073	>0.99999
ENSG00000184840	TMED9	12319.5	0.0111728	3.96426	0.0464759	>0.99999
ENSG00000241104	CEACAMP10	47.4733	-0.0291093	3.96393	0.046485	>0.99999
ENSG00000173040	EVC2	287.394	0.0212803	3.95657	0.0466888	>0.99999
ENSG00000122367	LDB3	47.5439	-0.0646605	3.94921	0.0468935	>0.99999
ENSG00000278730		707.88	-0.0106741	3.94522	0.0470047	>0.99999
ENSG00000140598	EFL1	561.35	0.0128369	3.9432	0.0470612	>0.99999
ENSG00000130066	SAT1	2408	0.0283206	3.93827	0.0471993	>0.99999
ENSG00000113356	POLR3G	106.024	0.0291361	3.93546	0.0472781	>0.99999
ENSG00000185250	PPIL6	31.4806	0.0358874	3.93525	0.0472841	>0.99999
ENSG00000103429	BFAR	2122	0.00668598	3.92815	0.0474841	>0.99999
ENSG00000243775	OSTCP1	35.6027	0.0238837	3.92664	0.0475268	>0.99999
ENSG00000187742	SECISBP2	637.617	0.00781753	3.92519	0.0475677	>0.99999
ENSG00000136295	TTYH3	15516.4	-0.0115935	3.91856	0.0477557	>0.99999
ENSG00000101421	CHMP4B	3281.09	-0.00556865	3.91728	0.0477922	>0.99999
ENSG00000133641	C12orf29	279.879	0.010212	3.9169	0.0478029	>0.99999
ENSG00000205413	SAMD9	298.215	-0.0396085	3.91618	0.0478235	>0.99999
ENSG00000198358		23.9252	0.0236451	3.91558	0.0478405	>0.99999
ENSG00000115415	STAT1	4645.56	-0.030221	3.91282	0.0479191	>0.99999
ENSG00000203667	COX20	856.961	-0.0175852	3.91222	0.0479363	>0.99999
ENSG00000277586	NEFL	301.183	0.100714	3.90409	0.0481688	>0.99999
ENSG00000151012	SLC7A11	1937.3	0.0283445	3.89313	0.0484841	>0.99999
ENSG00000213073	CHP1P2	114.745	0.0230727	3.89214	0.0485125	>0.99999
ENSG00000025796	SEC63	3994.11	0.010054	3.89173	0.0485244	>0.99999
ENSG00000160460	SPTBN4	38.7092	0.0301003	3.88924	0.0485965	>0.99999
ENSG00000248593	DSTNP2	55.3401	-0.0125555	3.88727	0.0486535	>0.99999
ENSG00000233382	NKAPP1	10.9243	-0.0264558	3.88064	0.0488461	>0.99999
ENSG00000175220	ARHGAP1	5992.88	-0.0114732	3.8802	0.0488588	>0.99999
ENSG00000178343	SHISA3	58.8981	0.0785761	3.88019	0.048859	>0.99999
ENSG00000227678		18.259	0.0467471	3.88017	0.0488598	>0.99999
ENSG00000164741	DLC1	4220.23	-0.0159355	3.87756	0.0489357	>0.99999
ENSG00000065600	PACC1	347.109	0.017677	3.87588	0.0489845	>0.99999
ENSG00000011347	SYT7	180.205	0.0628335	3.87262	0.0490798	>0.99999
ENSG00000150687	PRSS23	4807.56	-0.0231324	3.87036	0.049146	>0.99999
ENSG00000141644	MBD1	1778.74	0.00712103	3.86852	0.0491998	>0.99999
ENSG00000143013	LMO4	2098.11	-0.0185795	3.86753	0.0492288	>0.99999
ENSG00000124313	IQSEC2	560.653	-0.0139441	3.86592	0.0492761	>0.99999
ENSG00000072657	TRHDE	1108.55	-0.0272335	3.86459	0.0493154	>0.99999
ENSG00000229644	NAMPTP1	53.008	0.0712296	3.86414	0.0493284	>0.99999
ENSG00000169951	ZNF764	193.391	-0.0101126	3.86183	0.0493965	>0.99999
ENSG00000234062	TM9SF5P	23.4401	0.0251585	3.85973	0.0494584	>0.99999
ENSG00000258711		55.8877	0.0138272	3.85419	0.0496219	>0.99999
ENSG00000185986	SDHAP3	12.4643	0.0283518	3.85391	0.0496303	>0.99999
ENSG00000113369	ARRDC3	256.63	-0.0302066	3.85194	0.0496885	>0.99999
ENSG00000134900	TPP2	1098.23	0.0100934	3.85157	0.0496994	>0.99999
ENSG00000255114		10.9623	0.0421772	3.84609	0.049862	>0.99999
ENSG00000046647	GEMIN8	208.814	0.0131351	3.84536	0.0498837	>0.99999
ENSG00000119242	CCDC92	1915.58	-0.00845442	3.84366	0.0499345	>0.99999
ENSG00000267796	LIN37	273.775	0.0119879	3.83633	0.0501533	>0.99999
ENSG00000250497		34.2053	0.0151443	3.83545	0.0501794	>0.99999
ENSG00000143434	SEMA6C	141.89	-0.0170102	3.8313	0.0503038	>0.99999
ENSG00000090376	IRAK3	137.13	0.0390707	3.82962	0.0503543	>0.99999
ENSG00000276851		57.1109	0.0534995	3.82862	0.0503843	>0.99999
ENSG00000205485	LINC03009	132.225	0.0243593	3.82436	0.0505127	>0.99999
ENSG00000116171	SCP2	1463.59	-0.0130133	3.82136	0.050603	>0.99999
ENSG00000173991	TCAP	10.2316	0.0415299	3.8202	0.0506381	>0.99999
ENSG00000158089	GALNT14	118.267	0.0495492	3.81959	0.0506565	>0.99999
ENSG00000273420		123.584	-0.0246762	3.81938	0.0506629	>0.99999
ENSG00000139438	FAM222A	55.1196	0.0204052	3.81665	0.0507455	>0.99999
ENSG00000115459	ELMOD3	353.492	0.010198	3.81414	0.0508216	>0.99999
ENSG00000125459	MSTO1	1053.97	0.018103	3.81136	0.0509061	>0.99999
ENSG00000166455	C16orf46	17.4474	0.022933	3.80644	0.051056	>0.99999
ENSG00000092847	AGO1	1206	-0.00720585	3.79694	0.0513463	>0.99999
ENSG00000168566	SNRNP48	255.809	0.00926941	3.79674	0.0513524	>0.99999
ENSG00000128578	STRIP2	387.547	0.024791	3.79414	0.0514324	>0.99999
ENSG00000040199	PHLPP2	380.188	0.0112714	3.7931	0.0514644	>0.99999
ENSG00000238083	LRRC37A2	261.557	0.0309841	3.78725	0.0516443	>0.99999
ENSG00000162746	FCRLB	32.7448	0.0301745	3.78409	0.0517419	>0.99999
ENSG00000177917	ARL6IP6	186.394	0.0145635	3.77883	0.0519051	>0.99999
ENSG00000107745	MICU1	1659.94	-0.00722091	3.77646	0.0519786	>0.99999
ENSG00000227039	ITGB2-AS1	19.6746	-0.0670688	3.77441	0.0520424	>0.99999
ENSG00000228223	HCG11	154.669	0.01688	3.77408	0.0520527	>0.99999
ENSG00000183091	NEB	12.3245	0.049706	3.77323	0.0520789	>0.99999
ENSG00000268205		541.036	0.0151625	3.77283	0.0520914	>0.99999
ENSG00000138660	AP1AR	333.477	0.0158963	3.77169	0.0521269	>0.99999
ENSG00000164398	ACSL6	31.6378	0.0234901	3.76678	0.0522803	>0.99999
ENSG00000162194	LBHD1	192.819	0.0263559	3.76379	0.0523737	>0.99999
ENSG00000178950	GAK	2725.9	0.00769745	3.76368	0.0523771	>0.99999
ENSG00000120616	EPC1	446.543	-0.00773726	3.75891	0.0525269	>0.99999
ENSG00000272269	NUP153-AS1	58.874	0.0215024	3.7585	0.0525398	>0.99999
ENSG00000103264	FBXO31	726.296	0.00757293	3.75519	0.0526438	>0.99999
ENSG00000166979	EVA1C	72.1422	0.0288894	3.75357	0.0526948	>0.99999
ENSG00000267169	ADGRL1-AS1	78.0067	0.0204795	3.75312	0.052709	>0.99999
ENSG00000273058		11.0058	0.0374333	3.75295	0.0527146	>0.99999
ENSG00000175697	GPR156	32.3107	0.0252099	3.75281	0.0527187	>0.99999
ENSG00000122862	SRGN	371.002	-0.069285	3.75256	0.0527267	>0.99999
ENSG00000151726	ACSL1	886.367	0.0108888	3.74854	0.0528535	>0.99999
ENSG00000223459	TCAF1P1	250.598	-0.0293241	3.74806	0.0528688	>0.99999
ENSG00000253522	MIR3142HG	113.169	0.0641494	3.74684	0.0529074	>0.99999
ENSG00000176597	B3GNT5	193.251	0.0223953	3.7432	0.0530228	>0.99999
ENSG00000150433	TMEM218	215.73	0.0109833	3.7421	0.0530576	>0.99999
ENSG00000077264	PAK3	30.4151	-0.033914	3.73505	0.0532821	>0.99999
ENSG00000101187	SLCO4A1	60.6856	0.0449989	3.73421	0.0533089	>0.99999
ENSG00000143479	DYRK3	638.091	0.0179665	3.73113	0.0534072	>0.99999
ENSG00000250320	EDIL3-DT	23.216	-0.0253027	3.72858	0.053489	>0.99999
ENSG00000213186	TRIM59	258.259	-0.0182022	3.72764	0.053519	>0.99999
ENSG00000163191	S100A11	14022.5	-0.0114448	3.72727	0.0535308	>0.99999
ENSG00000144821	MYH15	102.933	0.0416882	3.72275	0.053676	>0.99999
ENSG00000111364	DDX55	429.427	0.00812304	3.72078	0.0537391	>0.99999
ENSG00000160446	ZDHHC12	757.233	-0.0135178	3.71847	0.0538137	>0.99999
ENSG00000198832	SELENOM	4384.54	-0.0116588	3.71404	0.0539566	>0.99999
ENSG00000106459	NRF1	257.331	0.00816921	3.71287	0.0539945	>0.99999
ENSG00000263647	BPTFP1	26.7763	0.0363683	3.71128	0.0540458	>0.99999
ENSG00000105323	HNRNPUL1	7588.05	-0.00918647	3.70863	0.0541319	>0.99999
ENSG00000101294	HM13	7816.42	0.0121335	3.70437	0.0542702	>0.99999
ENSG00000108468	CBX1	1491.51	-0.0112839	3.70421	0.0542755	>0.99999
ENSG00000259370		47.7261	-0.0482817	3.70413	0.054278	>0.99999
ENSG00000226200	SGMS1-AS1	63.9516	-0.015334	3.70401	0.0542819	>0.99999
ENSG00000170653	ATF7	991.659	-0.00747994	3.70259	0.054328	>0.99999
ENSG00000103005	USB1	1919.31	-0.0112763	3.70022	0.0544054	>0.99999
ENSG00000154710	RABGEF1	1053.3	0.0087259	3.69767	0.0544885	>0.99999
ENSG00000124160	NCOA5	931.948	0.00829313	3.69699	0.0545109	>0.99999
ENSG00000172081	MOB3A	1230.79	-0.00817029	3.69554	0.054558	>0.99999
ENSG00000266086		26.7358	0.0261185	3.69192	0.0546766	>0.99999
ENSG00000099330	OCEL1	265.249	-0.0123357	3.6873	0.0548284	>0.99999
ENSG00000182667	NTM	1660.99	-0.0376137	3.68662	0.0548507	>0.99999
ENSG00000135336	ORC3	531.468	-0.00884869	3.68383	0.0549427	>0.99999
ENSG00000095303	PTGS1	35.2234	-0.00644378	3.68322	0.0549626	>0.99999
ENSG00000261094		25.249	0.0230702	3.68012	0.0550649	>0.99999
ENSG00000120942	UBIAD1	488.811	0.00950929	3.67853	0.0551174	>0.99999
ENSG00000162998	FRZB	27.1933	-0.0489332	3.67829	0.0551255	>0.99999
ENSG00000074047	GLI2	1242.19	-0.0160228	3.67688	0.0551721	>0.99999
ENSG00000065413	ANKRD44	40.3163	-0.0319504	3.67633	0.0551902	>0.99999
ENSG00000236088	COX10-DT	80.7084	0.0119461	3.67368	0.0552779	>0.99999
ENSG00000069345	DNAJA2	1741.77	0.00421494	3.67144	0.0553523	>0.99999
ENSG00000174437	ATP2A2	11145.5	0.0119598	3.66831	0.0554565	>0.99999
ENSG00000123977	DAW1	74.7079	0.0428651	3.66717	0.0554943	>0.99999
ENSG00000283149		444.402	0.0287971	3.66638	0.0555205	>0.99999
ENSG00000118420	UBE3D	79.7536	0.014159	3.66612	0.0555294	>0.99999
ENSG00000182858	ALG12	936.728	0.0130855	3.66459	0.0555804	>0.99999
ENSG00000214357	NEURL1B	133.828	-0.0306347	3.66377	0.0556076	>0.99999
ENSG00000011260	UTP18	550.976	0.00867761	3.66318	0.0556275	>0.99999
ENSG00000011566	MAP4K3	1274.15	0.0189992	3.66249	0.0556504	>0.99999
ENSG00000132563	REEP2	593.36	-0.0225925	3.66236	0.0556547	>0.99999
ENSG00000211448	DIO2	109.041	0.0809016	3.66215	0.0556617	>0.99999
ENSG00000113504	SLC12A7	838.474	0.025336	3.65917	0.0557615	>0.99999
ENSG00000156026	MCU	1101.75	-0.0124507	3.65892	0.0557699	>0.99999
ENSG00000164885	CDK5	669.695	-0.0086921	3.65467	0.0559123	>0.99999
ENSG00000272142	LYRM4-AS1	48.9244	-0.0158833	3.6525	0.0559852	>0.99999
ENSG00000162576	MXRA8	13826.3	-0.0148527	3.65186	0.0560068	>0.99999
ENSG00000214706	IFRD2	1069.04	0.0117774	3.65153	0.0560177	>0.99999
ENSG00000182568	SATB1	404.083	-0.0195887	3.65108	0.0560329	>0.99999
ENSG00000160932	LY6E	6114.17	-0.0168375	3.65016	0.0560637	>0.99999
ENSG00000178919	FOXE1	72.5589	-0.0745825	3.64845	0.0561213	>0.99999
ENSG00000183580	FBXL7	916.594	-0.0125223	3.64823	0.0561287	>0.99999
ENSG00000124216	SNAI1	237.885	-0.0259105	3.64771	0.0561464	>0.99999
ENSG00000196724	ZNF418	34.7388	0.0185623	3.6446	0.0562513	>0.99999
ENSG00000164366	CCDC127	614.404	0.00938909	3.64436	0.0562593	>0.99999
ENSG00000173275	ZNF449	230.844	0.0126715	3.6394	0.0564274	>0.99999
ENSG00000221990	EXOC3-AS1	83.6143	-0.0163936	3.63862	0.0564537	>0.99999
ENSG00000196196	HRCT1	26.9237	-0.0441177	3.63725	0.0565003	>0.99999
ENSG00000170448	NFXL1	199.043	0.0124416	3.63456	0.0565916	>0.99999
ENSG00000251322	SHANK3	293.687	0.0159543	3.63417	0.0566048	>0.99999
ENSG00000197951	ZNF71	299.989	0.00701257	3.63324	0.0566366	>0.99999
ENSG00000215915	ATAD3C	17.026	0.0340825	3.63219	0.0566721	>0.99999
ENSG00000262049		57.3406	-0.0196138	3.63181	0.0566853	>0.99999
ENSG00000237588		19.0532	0.0210091	3.63153	0.0566948	>0.99999
ENSG00000173809	TDRD12	12.5345	-0.0459301	3.63026	0.0567378	>0.99999
ENSG00000137776	SLTM	2062.58	0.00980459	3.62722	0.0568418	>0.99999
ENSG00000059122	FLYWCH1	2536.5	0.0133848	3.61752	0.0571739	>0.99999
ENSG00000243781		13.2178	-0.0220933	3.61526	0.0572516	>0.99999
ENSG00000070081	NUCB2	4143.98	0.0203775	3.61302	0.0573291	>0.99999
ENSG00000204310	AGPAT1	3153.96	-0.0066818	3.61272	0.0573393	>0.99999
ENSG00000150667	FSIP1	11.6334	0.0295705	3.61234	0.0573524	>0.99999
ENSG00000011258	MBTD1	193.551	0.0144011	3.60759	0.0575163	>0.99999
ENSG00000105643	ARRDC2	172.913	0.0139817	3.60432	0.0576298	>0.99999
ENSG00000116586	LAMTOR2	773.038	-0.00804388	3.60361	0.0576543	>0.99999
ENSG00000277957	SENP3-EIF4A1	21.0947	0.0760159	3.6029	0.057679	>0.99999
ENSG00000147649	MTDH	3592.19	0.0126062	3.59497	0.0579545	>0.99999
ENSG00000235703	EOLA2-DT	41.187	0.026152	3.59244	0.0580431	>0.99999
ENSG00000163138	PACRGL	157.66	0.0101766	3.58549	0.0582863	>0.99999
ENSG00000110911	SLC11A2	1624.37	0.0185719	3.58337	0.0583608	>0.99999
ENSG00000154262	ABCA6	51.1274	0.042336	3.5831	0.0583702	>0.99999
ENSG00000096063	SRPK1	1332.43	0.0105547	3.58255	0.0583893	>0.99999
ENSG00000274933	TBC1D3I	11.5429	0.0756823	3.57932	0.0585032	>0.99999
ENSG00000185634	SHC4	23.143	-0.0272603	3.57904	0.0585131	>0.99999
ENSG00000153989	NUS1	1503.35	0.0101593	3.57838	0.0585361	>0.99999
ENSG00000072422	RHOBTB1	512.349	-0.0160179	3.57829	0.0585394	>0.99999
ENSG00000279569		24.4479	-0.0297578	3.57801	0.0585492	>0.99999
ENSG00000183979	NPB	33.1554	-0.0230082	3.57763	0.0585628	>0.99999
ENSG00000126950	TMEM35A	97.712	-0.0349263	3.57638	0.0586066	>0.99999
ENSG00000123342	MMP19	402.191	-0.0167364	3.5761	0.0586165	>0.99999
ENSG00000164663	USP49	116.524	0.0144368	3.57583	0.0586261	>0.99999
ENSG00000172932	ANKRD13D	1222.36	0.0108389	3.57452	0.0586724	>0.99999
ENSG00000177427	MIEF2	285.663	0.0141009	3.57162	0.058775	>0.99999
ENSG00000059758	CDK17	958.578	0.0186344	3.57052	0.0588139	>0.99999
ENSG00000175787	ZNF169	43.3268	0.0158228	3.56979	0.0588399	>0.99999
ENSG00000173065	FAM222B	850.007	-0.00768444	3.56759	0.0589176	>0.99999
ENSG00000172661	WASHC2C	2331.03	0.0179203	3.56741	0.0589242	>0.99999
ENSG00000138685	FGF2	5249.85	0.0238033	3.56601	0.058974	>0.99999
ENSG00000131127	ZNF141	61.0209	0.014566	3.56601	0.058974	>0.99999
ENSG00000213853	EMP2	288.323	-0.0303755	3.56184	0.0591223	>0.99999
ENSG00000164941	INTS8	581.281	0.00982514	3.56156	0.0591322	>0.99999
ENSG00000121274	TENT4B	337.088	0.0143557	3.5586	0.0592378	>0.99999
ENSG00000111319	SCNN1A	17.4687	-0.0309867	3.55418	0.0593958	>0.99999
ENSG00000143850	PLEKHA6	242.695	-0.0538074	3.55369	0.0594131	>0.99999
ENSG00000100083	GGA1	1468.34	0.00871125	3.5532	0.0594308	>0.99999
ENSG00000197380	DACT3	213.455	-0.0236668	3.55105	0.0595079	>0.99999
ENSG00000213928	IRF9	918.024	-0.0176935	3.54864	0.0595945	>0.99999
ENSG00000198298	ZNF485	31.7189	0.0171687	3.54724	0.0596446	>0.99999
ENSG00000179859	RNF227	99.5472	0.0130118	3.54429	0.0597509	>0.99999
ENSG00000135643	KCNMB4	115.424	-0.0226694	3.54416	0.0597554	>0.99999
ENSG00000100243	CYB5R3	18602.1	-0.0105006	3.54348	0.0597799	>0.99999
ENSG00000107815	TWNK	295.174	0.010388	3.54271	0.0598076	>0.99999
ENSG00000159399	HK2	1231.54	0.0229123	3.53913	0.0599368	>0.99999
ENSG00000149716	LTO1	623.047	0.00985099	3.53896	0.0599429	>0.99999
ENSG00000244242	IFITM10	49.366	0.0470534	3.53753	0.0599946	>0.99999
ENSG00000239521	CASTOR3	207.62	-0.0137721	3.53721	0.0600065	>0.99999
ENSG00000164237	CMBL	873.473	-0.0125438	3.53099	0.0602317	>0.99999
ENSG00000231890	DARS1-AS1	20.7243	0.0217556	3.52962	0.0602816	>0.99999
ENSG00000198018	ENTPD7	930.681	0.015816	3.5277	0.0603516	>0.99999
ENSG00000163884	KLF15	60.1889	0.0530325	3.52743	0.0603612	>0.99999
ENSG00000116815	CD58	256.346	0.0180612	3.52699	0.0603774	>0.99999
ENSG00000187607	ZNF286A	424.824	0.00908532	3.51774	0.0607152	>0.99999
ENSG00000130402	ACTN4	30903.6	-0.0123542	3.51362	0.0608663	>0.99999
ENSG00000121957	GPSM2	136.308	-0.0264489	3.51059	0.0609779	>0.99999
ENSG00000237441	RGL2	855.545	0.011552	3.50863	0.0610499	>0.99999
ENSG00000185624	P4HB	73306.8	0.0103035	3.50829	0.0610623	>0.99999
ENSG00000147799	ARHGAP39	294.301	0.0128354	3.50806	0.0610711	>0.99999
ENSG00000180332	KCTD4	75.4785	0.0481224	3.50216	0.0612887	>0.99999
ENSG00000116273	PHF13	724.206	0.00998237	3.50064	0.0613451	>0.99999
ENSG00000125814	NAPB	202.384	0.0120586	3.49988	0.0613732	>0.99999
ENSG00000103522	IL21R	51.8728	0.0467813	3.49938	0.061392	>0.99999
ENSG00000107021	TBC1D13	1029.44	-0.0063327	3.4974	0.0614652	>0.99999
ENSG00000165195	PIGA	104.72	0.0194104	3.49675	0.0614893	>0.99999
ENSG00000178104	PDE4DIP	4839.73	0.0192329	3.49578	0.0615255	>0.99999
ENSG00000134343	ANO3	38.3013	-0.0513284	3.49343	0.0616128	>0.99999
ENSG00000105639	JAK3	162.591	-0.0255509	3.49239	0.0616514	>0.99999
ENSG00000151090	THRB	40.977	-0.0439889	3.49132	0.0616913	>0.99999
ENSG00000197385	ZNF860	33.6208	0.0224912	3.49126	0.0616936	>0.99999
ENSG00000240291		10.8692	0.0298866	3.48464	0.0619407	>0.99999
ENSG00000175893	ZDHHC21	312.312	0.0138356	3.48456	0.0619439	>0.99999
ENSG00000088298	EDEM2	1464.35	0.0123463	3.48251	0.0620207	>0.99999
ENSG00000115604	IL18R1	16.7182	0.0554053	3.48163	0.0620537	>0.99999
ENSG00000116922	C1orf109	296.44	0.00884262	3.47987	0.0621195	>0.99999
ENSG00000237523	LINC00857	100.689	0.0166742	3.47785	0.0621955	>0.99999
ENSG00000168497	CAVIN2	141.418	-0.0316151	3.47568	0.0622773	>0.99999
ENSG00000272325	NUDT3	1248.55	-0.00899325	3.47142	0.0624377	>0.99999
ENSG00000213901	SLC23A3	45.6134	0.0269518	3.47105	0.0624517	>0.99999
ENSG00000184900	SUMO3	2304.58	-0.0104547	3.47028	0.0624808	>0.99999
ENSG00000163159	VPS72	855.134	-0.00921795	3.46774	0.0625766	>0.99999
ENSG00000114956	DGUOK	907.604	-0.0107956	3.46712	0.0626003	>0.99999
ENSG00000141522	ARHGDIA	15322.4	-0.0107329	3.46617	0.0626363	>0.99999
ENSG00000140104	CLBA1	256.969	0.0125919	3.4657	0.0626541	>0.99999
ENSG00000265778	ZNF516-AS1	17.2347	0.023792	3.4644	0.0627032	>0.99999
ENSG00000271601	LIX1L	1211.63	-0.00970947	3.46236	0.0627807	>0.99999
ENSG00000258472		128.313	0.0139294	3.46091	0.0628358	>0.99999
ENSG00000180139	ACTA2-AS1	58.3113	-0.0373267	3.46059	0.0628478	>0.99999
ENSG00000100376	FAM118A	728.544	-0.030698	3.45901	0.0629078	>0.99999
ENSG00000175470	PPP2R2D	748.468	0.00926418	3.458	0.0629464	>0.99999
ENSG00000106404	CLDN15	157.898	0.0204525	3.45632	0.0630103	>0.99999
ENSG00000065150	IPO5	6603.24	0.00969217	3.45102	0.0632128	>0.99999
ENSG00000114904	NEK4	347.219	0.0106165	3.44884	0.0632961	>0.99999
ENSG00000078081	LAMP3	233.706	0.0768176	3.44872	0.0633006	>0.99999
ENSG00000213722	DDAH2	1470.55	-0.013511	3.44802	0.0633275	>0.99999
ENSG00000106785	TRIM14	400.654	-0.0337745	3.44715	0.063361	>0.99999
ENSG00000174013	FBXO45	259.558	0.00821933	3.44665	0.06338	>0.99999
ENSG00000205352	PRR13	2459.23	-0.00915148	3.44543	0.063427	>0.99999
ENSG00000100027	YPEL1	16.7845	-0.0305465	3.44526	0.0634335	>0.99999
ENSG00000128891	CCDC32	346.143	-0.0118826	3.44505	0.0634413	>0.99999
ENSG00000124783	SSR1	6298.16	0.0112252	3.44135	0.0635836	>0.99999
ENSG00000215769	ARHGAP27P1-BPTFP1-KPNA2P3	198.735	0.0207521	3.43893	0.0636771	>0.99999
ENSG00000105835	NAMPT	1994.63	0.0314243	3.43837	0.0636984	>0.99999
ENSG00000068028	RASSF1	820.629	0.0114035	3.43628	0.0637791	>0.99999
ENSG00000163125	RPRD2	1074.19	-0.00671073	3.43308	0.0639029	>0.99999
ENSG00000174807	CD248	17900.5	-0.0217899	3.43258	0.0639223	>0.99999
ENSG00000151233	GXYLT1	473.931	0.0126786	3.43138	0.0639687	>0.99999
ENSG00000156502	SUPV3L1	717.068	0.012412	3.4304	0.0640067	>0.99999
ENSG00000165626	BEND7	288.548	0.0161554	3.43031	0.06401	>0.99999
ENSG00000196557	CACNA1H	101.4	-0.0530098	3.42857	0.0640776	>0.99999
ENSG00000265491	RNF115	961.11	-0.00762479	3.42837	0.0640854	>0.99999
ENSG00000183486	MX2	317.859	-0.0444969	3.4275	0.0641192	>0.99999
ENSG00000138709	LARP1B	377.503	0.0138248	3.42636	0.0641634	>0.99999
ENSG00000270629	NBPF14	2784.68	0.0187366	3.42532	0.0642039	>0.99999
ENSG00000136205	TNS3	6180.81	-0.0223749	3.42449	0.0642362	>0.99999
ENSG00000110031	LPXN	1095.61	0.0339592	3.4243	0.0642436	>0.99999
ENSG00000197405	C5AR1	66.5315	0.0297899	3.42323	0.0642852	>0.99999
ENSG00000247498	GPRC5D-AS1	25.1355	-0.0507006	3.41864	0.0644642	>0.99999
ENSG00000167460	TPM4	42105.7	-0.0103286	3.41771	0.0645004	>0.99999
ENSG00000272768		64.6497	-0.0188838	3.41658	0.0645448	>0.99999
ENSG00000131115	ZNF227	185.854	0.00833419	3.41609	0.0645638	>0.99999
ENSG00000069188	SDK2	65.4348	0.0612387	3.4151	0.0646023	>0.99999
ENSG00000151320	AKAP6	243.756	-0.0480673	3.41402	0.0646447	>0.99999
ENSG00000236423	LINC01134	22.3876	0.031062	3.41229	0.0647125	>0.99999
ENSG00000244055		11.1523	0.0313776	3.40974	0.0648125	>0.99999
ENSG00000165675	ENOX2	241.967	0.00947808	3.40826	0.0648709	>0.99999
ENSG00000063169	BICRA	643.724	-0.00812782	3.40769	0.0648932	>0.99999
ENSG00000128294	TPST2	1156.85	-0.0174148	3.40667	0.0649334	>0.99999
ENSG00000175183	CSRP2	1244.51	-0.029528	3.4061	0.0649558	>0.99999
ENSG00000142233	NTN5	13.1651	-0.0278945	3.40465	0.065013	>0.99999
ENSG00000146648	EGFR	3370.88	0.0175512	3.40395	0.0650404	>0.99999
ENSG00000118900	UBN1	1667.29	0.00921497	3.40284	0.0650841	>0.99999
ENSG00000158292	GPR153	386.084	-0.0153047	3.40207	0.0651145	>0.99999
ENSG00000137166	FOXP4	1647.85	-0.00799079	3.40041	0.0651804	>0.99999
ENSG00000196352	CD55	2614.03	0.0239464	3.39974	0.0652066	>0.99999
ENSG00000270885	RASL10B	307.507	0.0245417	3.3978	0.0652835	>0.99999
ENSG00000249992	TMEM158	1362.03	0.0385517	3.3966	0.0653311	>0.99999
ENSG00000260908		11.6635	0.0269213	3.39622	0.0653459	>0.99999
ENSG00000229625		20.5183	-0.0180289	3.39511	0.06539	>0.99999
ENSG00000197016	ZNF470	167.893	0.0106908	3.39375	0.0654438	>0.99999
ENSG00000134769	DTNA	241.241	0.0203694	3.39156	0.0655311	>0.99999
ENSG00000186280	KDM4D	18.0759	-0.0257715	3.38922	0.0656241	>0.99999
ENSG00000072840	EVC	2614.52	0.0212427	3.38824	0.0656631	>0.99999
ENSG00000176393	RNPEP	2369.96	-0.0104061	3.38701	0.0657122	>0.99999
ENSG00000188659	SAXO2	20.5991	0.0509456	3.38435	0.065818	>0.99999
ENSG00000156313	RPGR	139.015	0.0129491	3.38253	0.0658907	>0.99999
ENSG00000115008	IL1A	241.029	0.0550592	3.38006	0.0659897	>0.99999
ENSG00000068097	HEATR6	545.313	-0.00864366	3.37595	0.0661543	>0.99999
ENSG00000099290	WASHC2A	2805.17	0.0149346	3.36772	0.0664855	>0.99999
ENSG00000254473	UBQLN1-AS1	24.2354	-0.0202478	3.36719	0.0665069	>0.99999
ENSG00000279605		34.9848	-0.0276788	3.36584	0.0665616	>0.99999
ENSG00000150347	ARID5B	3131.09	-0.013061	3.36344	0.0666588	>0.99999
ENSG00000124571	XPO5	1344.44	0.00834343	3.36176	0.0667268	>0.99999
ENSG00000140521	POLG	1431.34	0.00869672	3.35907	0.0668359	>0.99999
ENSG00000138442	WDR12	646.622	0.00672238	3.35757	0.0668966	>0.99999
ENSG00000197102	DYNC1H1	19724	0.0157814	3.34781	0.0672947	>0.99999
ENSG00000205339	IPO7	4113.43	0.0087453	3.34496	0.067411	>0.99999
ENSG00000132640	BTBD3	438.644	0.0159406	3.3404	0.0675982	>0.99999
ENSG00000104432	IL7	11.6669	-0.0496918	3.34036	0.0675997	>0.99999
ENSG00000173597	SULT1B1	157.182	-0.0234426	3.34016	0.0676082	>0.99999
ENSG00000187164	SHTN1	307.72	0.0131876	3.33853	0.0676751	>0.99999
ENSG00000176915	ANKLE2	3488.96	0.010679	3.3342	0.0678533	>0.99999
ENSG00000104613	INTS10	824.238	0.00665526	3.3334	0.0678863	>0.99999
ENSG00000180376	CCDC66	207.453	0.0129286	3.33229	0.0679324	>0.99999
ENSG00000233954	UQCRHL	12.6853	0.0436337	3.33058	0.0680029	>0.99999
ENSG00000217801		20.0229	0.0356622	3.32621	0.068184	>0.99999
ENSG00000141027	NCOR1	3026.69	-0.00626693	3.32606	0.0681899	>0.99999
ENSG00000118418	HMGN3	430.343	-0.0146064	3.32586	0.0681985	>0.99999
ENSG00000145416	MARCHF1	11.294	-0.0427546	3.32238	0.068343	>0.99999
ENSG00000163870	TPRA1	1075.39	0.00835326	3.32054	0.0684193	>0.99999
ENSG00000278784		61.8052	0.014562	3.31961	0.068458	>0.99999
ENSG00000109917	ZPR1	1562.21	0.00834943	3.31717	0.0685596	>0.99999
ENSG00000128791	TWSG1	2630.9	-0.0191186	3.31708	0.0685635	>0.99999
ENSG00000125971	DYNLRB1	3002.32	-0.00952728	3.31576	0.0686185	>0.99999
ENSG00000198130	HIBCH	272.393	-0.00997322	3.31506	0.0686477	>0.99999
ENSG00000163389	POGLUT1	668.909	0.0114015	3.31429	0.0686802	>0.99999
ENSG00000104783	KCNN4	12.3715	-0.0555261	3.31428	0.0686805	>0.99999
ENSG00000133243	BTBD2	2938.95	-0.010638	3.31411	0.0686876	>0.99999
ENSG00000112304	ACOT13	528.779	-0.0132166	3.31254	0.0687529	>0.99999
ENSG00000140092	FBLN5	7279.93	-0.0311662	3.31186	0.0687815	>0.99999
ENSG00000127191	TRAF2	321.36	0.0107526	3.31106	0.0688152	>0.99999
ENSG00000119280	C1orf198	4757.65	-0.019128	3.30815	0.0689371	>0.99999
ENSG00000150316	CWC15	770.865	-0.0088354	3.30567	0.0690411	>0.99999
ENSG00000140464	PML	2802.99	-0.0117032	3.30106	0.0692352	>0.99999
ENSG00000270189		76.822	0.0221631	3.29828	0.0693526	>0.99999
ENSG00000224594	RPL29P19	69.8618	0.0221122	3.29709	0.0694026	>0.99999
ENSG00000167524	RSKR	52.6996	0.0182381	3.29694	0.0694091	>0.99999
ENSG00000197599	CCDC154	12.6459	0.0403542	3.29536	0.0694758	>0.99999
ENSG00000164172	MOCS2	887.939	-0.00946651	3.29491	0.069495	>0.99999
ENSG00000105393	BABAM1	1853.89	-0.00817591	3.2931	0.0695716	>0.99999
ENSG00000020256	ZFP64	706.064	0.00687273	3.29273	0.0695871	>0.99999
ENSG00000171867	PRNP	15716.2	0.0292147	3.2904	0.069686	>0.99999
ENSG00000172830	SSH3	841.166	-0.0104169	3.29006	0.0697003	>0.99999
ENSG00000134716	CYP2J2	31.6219	-0.0380202	3.28987	0.0697087	>0.99999
ENSG00000175970	UNC119B	960.249	0.00863633	3.28608	0.0698695	>0.99999
ENSG00000080573	COL5A3	131.649	0.0531234	3.28316	0.069994	>0.99999
ENSG00000160584	SIK3	885.849	0.0115385	3.2825	0.070022	>0.99999
ENSG00000074657	ZNF532	1466.96	-0.00790349	3.27969	0.0701422	>0.99999
ENSG00000145354	CISD2	517.63	0.013779	3.27913	0.0701661	>0.99999
ENSG00000111335	OAS2	82.6705	-0.0927644	3.27834	0.0702	>0.99999
ENSG00000172780	RAB43	939.747	0.0202325	3.27697	0.0702583	>0.99999
ENSG00000135407	AVIL	53.2379	0.0262929	3.27646	0.0702803	>0.99999
ENSG00000172458	IL17D	56.8051	-0.0218278	3.27536	0.0703274	>0.99999
ENSG00000127081	ZNF484	75.7044	-0.0138877	3.27126	0.0705036	>0.99999
ENSG00000162755	KLHDC9	12.178	-0.0313153	3.2705	0.0705361	>0.99999
ENSG00000162623	TYW3	519.711	0.00918509	3.26888	0.0706059	>0.99999
ENSG00000168785	TSPAN5	1442.98	0.0148422	3.26878	0.0706102	>0.99999
ENSG00000141452	RMC1	543.502	0.00762637	3.26681	0.0706949	>0.99999
ENSG00000135637	CCDC142	233.54	0.010184	3.26467	0.0707874	>0.99999
ENSG00000070808	CAMK2A	228.627	0.0269454	3.26258	0.0708776	>0.99999
ENSG00000184898	RBM43	221.259	-0.0174713	3.26213	0.0708971	>0.99999
ENSG00000176533	GNG7	19.6086	-0.0357261	3.2591	0.0710281	>0.99999
ENSG00000144619	CNTN4	25.6816	-0.0539461	3.25702	0.0711183	>0.99999
ENSG00000119508	NR4A3	38.1139	-0.0471746	3.25646	0.0711425	>0.99999
ENSG00000086712	TXLNG	401.143	0.00870686	3.25634	0.0711478	>0.99999
ENSG00000100068	LRP5L	75.1654	0.0211224	3.25465	0.0712213	>0.99999
ENSG00000010704	HFE	398.83	-0.0129483	3.25436	0.0712336	>0.99999
ENSG00000139579	NABP2	812.613	-0.00734752	3.25276	0.0713032	>0.99999
ENSG00000250182	EEF1A1P13	11.0412	0.0368228	3.25005	0.0714215	>0.99999
ENSG00000239697	TNFSF12	543.633	-0.0129272	3.2488	0.0714759	>0.99999
ENSG00000036257	CUL3	1715.35	0.005389	3.24624	0.0715876	>0.99999
ENSG00000233452	STXBP5-AS1	31.1948	0.039336	3.24612	0.0715926	>0.99999
ENSG00000157212	PAXIP1	329.512	0.00949926	3.24561	0.0716148	>0.99999
ENSG00000160685	ZBTB7B	1183.84	0.00926533	3.24423	0.0716753	>0.99999
ENSG00000141384	TAF4B	54.478	0.020721	3.24289	0.0717339	>0.99999
ENSG00000125257	ABCC4	965.936	0.0222084	3.2421	0.0717688	>0.99999
ENSG00000269600		33.813	-0.0318621	3.2418	0.0717818	>0.99999
ENSG00000260822		59.8668	0.0224069	3.24031	0.0718469	>0.99999
ENSG00000164305	CASP3	793.223	0.0126873	3.23955	0.0718806	>0.99999
ENSG00000248235		14.7377	-0.0409146	3.23701	0.0719918	>0.99999
ENSG00000160050	CCDC28B	199.925	-0.0164575	3.23682	0.0720005	>0.99999
ENSG00000266094	RASSF5	170.044	-0.0328674	3.22957	0.0723197	>0.99999
ENSG00000260306		15.5093	0.0439956	3.22853	0.0723658	>0.99999
ENSG00000140320	BAHD1	619.13	0.00718649	3.2252	0.072513	>0.99999
ENSG00000233276	GPX1	6502.65	-0.0111326	3.22147	0.0726782	>0.99999
ENSG00000137868	STRA6	319.993	0.0445733	3.22137	0.0726828	>0.99999
ENSG00000174004	NRROS	137.641	0.030977	3.22038	0.0727269	>0.99999
ENSG00000224086	PPM1F-AS1	55.1867	-0.0184383	3.21833	0.0728181	>0.99999
ENSG00000153933	DGKE	164.663	0.0141173	3.21767	0.0728471	>0.99999
ENSG00000270055		211.92	0.0195325	3.21549	0.0729446	>0.99999
ENSG00000183671	CMKLR2	1143.5	0.0246338	3.21238	0.0730829	>0.99999
ENSG00000171453	POLR1C	439.293	0.00830018	3.21133	0.07313	>0.99999
ENSG00000163882	POLR2H	701.885	0.00941647	3.21019	0.0731811	>0.99999
ENSG00000134375	TIMM17A	1583.24	0.0119545	3.20978	0.0731995	>0.99999
ENSG00000071626	DAZAP1	3060.12	0.00947923	3.2062	0.0733595	>0.99999
ENSG00000205562	FLRT2-AS1	70.7946	-0.017525	3.20501	0.0734129	>0.99999
ENSG00000239467		17.3368	0.0345086	3.20322	0.0734933	>0.99999
ENSG00000162645	GBP2	339.068	-0.033168	3.20315	0.0734965	>0.99999
ENSG00000121361	KCNJ8	58.4275	-0.0330107	3.19887	0.0736891	>0.99999
ENSG00000131480	AOC2	34.1631	0.0273557	3.1967	0.0737871	>0.99999
ENSG00000148450	MSRB2	613.049	-0.0103649	3.19534	0.0738483	>0.99999
ENSG00000271780		23.6361	-0.0248357	3.19159	0.074018	>0.99999
ENSG00000107438	PDLIM1	1304.48	-0.0256655	3.19146	0.074024	>0.99999
ENSG00000171262	FAM98B	522.425	-0.00986147	3.18943	0.074116	>0.99999
ENSG00000280537		50.2022	0.0271612	3.1888	0.0741444	>0.99999
ENSG00000144026	ZNF514	277.476	0.0137798	3.18415	0.0743556	>0.99999
ENSG00000181541	MAB21L2	327.577	-0.0682516	3.1834	0.0743899	>0.99999
ENSG00000028137	TNFRSF1B	95.9806	0.0516458	3.17888	0.0745959	>0.99999
ENSG00000078795	PKD2L2	22.0544	0.017603	3.17706	0.0746788	>0.99999
ENSG00000215041	NEURL4	865.739	0.00716542	3.17617	0.0747198	>0.99999
ENSG00000272869		228.6	0.00985601	3.17538	0.0747559	>0.99999
ENSG00000173898	SPTBN2	574.578	0.0314723	3.17365	0.0748351	>0.99999
ENSG00000116039	ATP6V1B1	12.8303	0.040742	3.17295	0.0748673	>0.99999
ENSG00000150907	FOXO1	198.178	-0.0242944	3.16817	0.0750866	>0.99999
ENSG00000144488	ESPNL	195.91	0.043371	3.1678	0.0751036	>0.99999
ENSG00000134864	GGACT	118.549	-0.0159783	3.16766	0.0751102	>0.99999
ENSG00000167785	ZNF558	251.021	0.0129901	3.16641	0.0751673	>0.99999
ENSG00000126870	DYNC2I1	423.277	0.00920016	3.16624	0.0751754	>0.99999
ENSG00000085978	ATG16L1	562.738	0.00667389	3.16409	0.0752743	>0.99999
ENSG00000111348	ARHGDIB	510.308	-0.0376933	3.1612	0.0754078	>0.99999
ENSG00000178057	NDUFAF3	1458.11	-0.0111081	3.15861	0.0755273	>0.99999
ENSG00000171246	NPTX1	68.6016	0.0942076	3.15759	0.0755747	>0.99999
ENSG00000116350	SRSF4	1793.39	0.00739065	3.15433	0.0757256	>0.99999
ENSG00000156113	KCNMA1	3071.17	0.0179819	3.15356	0.0757616	>0.99999
ENSG00000186976	EFCAB6	18.423	0.025213	3.15322	0.0757773	>0.99999
ENSG00000186834	HEXIM1	1664.29	-0.00932615	3.15198	0.0758349	>0.99999
ENSG00000104435	STMN2	618.116	-0.0617451	3.15033	0.0759115	>0.99999
ENSG00000257038	ARHGEF17-AS1	77.6606	-0.0192939	3.14887	0.0759794	>0.99999
ENSG00000168538	TRAPPC11	699.653	-0.00800462	3.14869	0.0759878	>0.99999
ENSG00000259972		113.314	0.0229459	3.14763	0.0760375	>0.99999
ENSG00000258102	MAP1LC3B2	29.0132	-0.018777	3.14397	0.0762079	>0.99999
ENSG00000149564	ESAM	13.4194	0.0473761	3.14314	0.0762467	>0.99999
ENSG00000140548	ZNF710	623.872	0.011021	3.14254	0.0762751	>0.99999
ENSG00000198496	NBR2	77.9246	0.0250346	3.14103	0.0763454	>0.99999
ENSG00000058262	SEC61A1	24822.5	0.00759881	3.14027	0.0763812	>0.99999
ENSG00000147655	RSPO2	11.3282	-0.0652618	3.13953	0.0764159	>0.99999
ENSG00000130734	ATG4D	478.495	0.00926069	3.13688	0.0765401	>0.99999
ENSG00000270344	POC1B-AS1	19.237	0.0226724	3.1343	0.0766611	>0.99999
ENSG00000267508	ZNF285	56.5108	0.0171828	3.13322	0.0767123	>0.99999
ENSG00000159131	GART	1422.19	0.0081448	3.12664	0.0770223	>0.99999
ENSG00000125967	NECAB3	651.084	0.00907546	3.12627	0.0770398	>0.99999
ENSG00000189376	C8orf76	300.887	0.00766563	3.1255	0.0770763	>0.99999
ENSG00000243335	KCTD7	473.629	0.0123382	3.12457	0.0771204	>0.99999
ENSG00000235725		26.1639	0.0189175	3.12248	0.0772192	>0.99999
ENSG00000186409	CCDC30	29.5003	0.0253026	3.12235	0.0772253	>0.99999
ENSG00000111676	ATN1	7705.48	-0.00953031	3.12187	0.0772479	>0.99999
ENSG00000221869	CEBPD	2935.56	-0.0260493	3.12183	0.0772502	>0.99999
ENSG00000163347	CLDN1	885.799	0.0534825	3.12162	0.0772598	>0.99999
ENSG00000143842	SOX13	204.848	0.0161921	3.12072	0.0773027	>0.99999
ENSG00000154328	NEIL2	271.835	0.00862991	3.11923	0.0773732	>0.99999
ENSG00000198276	UCKL1	684.96	0.00767723	3.11778	0.077442	>0.99999
ENSG00000224259	LINC01133	191.013	-0.0380066	3.11697	0.0774807	>0.99999
ENSG00000067646	ZFY	133.249	0.0236744	3.11555	0.0775485	>0.99999
ENSG00000138794	CASP6	249.385	-0.0113381	3.11379	0.0776323	>0.99999
ENSG00000105136	ZNF419	298.671	0.0127381	3.11129	0.0777512	>0.99999
ENSG00000100462	PRMT5	1537.12	0.00854027	3.11124	0.0777535	>0.99999
ENSG00000112699	GMDS	358.442	-0.00866517	3.11111	0.0777599	>0.99999
ENSG00000157045	NTAN1	843.068	-0.0113846	3.10733	0.0779407	>0.99999
ENSG00000149292	TTC12	130.206	-0.0195426	3.10559	0.0780242	>0.99999
ENSG00000163006	CCDC138	39.1033	-0.0195649	3.10163	0.0782137	>0.99999
ENSG00000125611	CHCHD5	311.494	-0.0120897	3.1004	0.078273	>0.99999
ENSG00000183386	FHL3	1059.21	-0.0151368	3.09943	0.0783199	>0.99999
ENSG00000175287	PHYHD1	67.029	-0.0326921	3.09738	0.0784186	>0.99999
ENSG00000243477	NAA80	198.046	-0.0119432	3.09632	0.0784693	>0.99999
ENSG00000131471	AOC3	26.2932	0.0426369	3.09545	0.0785113	>0.99999
ENSG00000011052	NME1-NME2	399.649	-0.018189	3.09291	0.0786342	>0.99999
ENSG00000121940	CLCC1	1277.02	0.0100004	3.09278	0.0786405	>0.99999
ENSG00000130005	GAMT	924.662	-0.0103553	3.09111	0.0787211	>0.99999
ENSG00000023318	ERP44	2812.44	0.0112864	3.09026	0.078762	>0.99999
ENSG00000120509	PDZD11	928.946	-0.00904142	3.08974	0.0787874	>0.99999
ENSG00000263563	UBBP4	36.1749	-0.0183468	3.08792	0.0788756	>0.99999
ENSG00000113048	MRPS27	1116.77	0.00823959	3.08669	0.0789354	>0.99999
ENSG00000120149	MSX2	69.0369	0.0264169	3.08382	0.0790747	>0.99999
ENSG00000004660	CAMKK1	302.78	0.0179044	3.08347	0.0790915	>0.99999
ENSG00000116198	CEP104	958.288	0.00751121	3.08133	0.0791956	>0.99999
ENSG00000153066	TXNDC11	1460.59	0.00968191	3.07784	0.0793657	>0.99999
ENSG00000197961	ZNF121	477.916	0.0111233	3.07776	0.0793696	>0.99999
ENSG00000149084	HSD17B12	2500.98	0.0134711	3.07669	0.0794219	>0.99999
ENSG00000171612	SLC25A33	277.98	0.00945719	3.07364	0.0795711	>0.99999
ENSG00000271430		347.074	0.0138875	3.07209	0.0796472	>0.99999
ENSG00000183779	ZNF703	3366.75	-0.0137574	3.0703	0.079735	>0.99999
ENSG00000109572	CLCN3	1803.12	0.0116437	3.0701	0.0797448	>0.99999
ENSG00000182372	CLN8	1316.8	0.0156004	3.06921	0.0797885	>0.99999
ENSG00000152527	PLEKHH2	155.646	0.0275985	3.06871	0.079813	>0.99999
ENSG00000204920	ZNF155	158.286	0.0126357	3.06646	0.0799235	>0.99999
ENSG00000156875	MFSD14A	1155.75	0.0103886	3.06626	0.0799331	>0.99999
ENSG00000163792	TCF23	12.4023	0.0248315	3.06542	0.0799744	>0.99999
ENSG00000225339		192.283	0.0148238	3.06271	0.0801078	>0.99999
ENSG00000114378	HYAL1	11.8911	-0.0331313	3.05937	0.0802729	>0.99999
ENSG00000118705	RPN2	12569.4	0.00907358	3.05717	0.0803815	>0.99999
ENSG00000276248		84.8271	0.017684	3.05549	0.0804646	>0.99999
ENSG00000078142	PIK3C3	827.348	0.00821099	3.05461	0.0805086	>0.99999
ENSG00000184640	SEPTIN9	10505.7	-0.012402	3.05426	0.0805258	>0.99999
ENSG00000117318	ID3	2782.71	-0.0305736	3.05259	0.0806086	>0.99999
ENSG00000146426	TIAM2	361.757	-0.0159212	3.05198	0.0806387	>0.99999
ENSG00000160255	ITGB2	55.6238	-0.053405	3.03546	0.0814633	>0.99999
ENSG00000040487	SLC66A1	899.524	0.0112328	3.03503	0.081485	>0.99999
ENSG00000283266		40.2837	-0.0774318	3.03034	0.0817209	>0.99999
ENSG00000152475	ZNF837	51.6247	-0.0125368	3.02935	0.0817709	>0.99999
ENSG00000137965	IFI44	164.645	-0.0430682	3.029	0.0817883	>0.99999
ENSG00000259863	SH3RF3-AS1	29.3208	-0.0284198	3.02771	0.0818536	>0.99999
ENSG00000154678	PDE1C	71.9238	0.0719003	3.02703	0.0818877	>0.99999
ENSG00000106554	CHCHD3	1276.2	0.00693537	3.02566	0.0819571	>0.99999
ENSG00000167693	NXN	2932.46	-0.012027	3.02507	0.0819868	>0.99999
ENSG00000106012	IQCE	689.349	0.00899196	3.02483	0.0819989	>0.99999
ENSG00000205084	TMEM231	408.697	0.00985234	3.02197	0.0821434	>0.99999
ENSG00000143569	UBAP2L	6962.47	-0.00613119	3.0219	0.0821471	>0.99999
ENSG00000176142	TMEM39A	1266.02	0.00972776	3.02134	0.0821755	>0.99999
ENSG00000169599	NFU1	544.358	-0.00873846	3.02082	0.0822019	>0.99999
ENSG00000048991	R3HDM1	958.938	-0.00683988	3.02019	0.0822336	>0.99999
ENSG00000134504	KCTD1	333.57	0.0118414	3.01662	0.0824152	>0.99999
ENSG00000142751	GPN2	803.762	0.00573143	3.01641	0.0824255	>0.99999
ENSG00000027697	IFNGR1	873.435	0.011716	3.01606	0.0824437	>0.99999
ENSG00000170873	MTSS1	152.56	0.0361962	3.01344	0.0825769	>0.99999
ENSG00000105778	AVL9	1015.3	0.0107446	3.01156	0.0826728	>0.99999
ENSG00000113811	SELENOK	492.085	0.0168032	3.01146	0.0826776	>0.99999
ENSG00000224281	SLC25A5-AS1	16.2031	-0.0218691	3.00958	0.0827737	>0.99999
ENSG00000232931	LINC00342	192.875	0.02332	3.00749	0.0828806	>0.99999
ENSG00000132361	CLUH	2296.4	0.00986189	3.00647	0.0829325	>0.99999
ENSG00000131773	KHDRBS3	311.012	-0.020078	3.00614	0.0829496	>0.99999
ENSG00000279777		44.0528	0.0182996	3.00545	0.0829847	>0.99999
ENSG00000150403	TMCO3	3104.87	0.0098608	3.00198	0.0831628	>0.99999
ENSG00000104611	SH2D4A	798.042	-0.0218456	2.99877	0.0833279	>0.99999
ENSG00000076067	RBMS2	2027.27	-0.00802936	2.99771	0.0833821	>0.99999
ENSG00000165272	AQP3	27.6654	-0.0316582	2.99665	0.0834371	>0.99999
ENSG00000213977	TAX1BP3	6880.64	-0.00971612	2.99662	0.0834383	>0.99999
ENSG00000237973	MTCO1P12	7154.6	-0.0452652	2.99552	0.0834949	>0.99999
ENSG00000168807	SNTB2	1324.23	-0.0111214	2.99523	0.0835101	>0.99999
ENSG00000164944	VIRMA	1370.31	-0.00545657	2.99486	0.0835293	>0.99999
ENSG00000132434	LANCL2	736.559	-0.0128633	2.9942	0.083563	>0.99999
ENSG00000154640	BTG3	550.216	0.0115851	2.99278	0.0836365	>0.99999
ENSG00000261326	LINC01355	67.1894	0.0226334	2.99173	0.0836909	>0.99999
ENSG00000145241	CENPC	211.928	-0.0101913	2.99076	0.0837408	>0.99999
ENSG00000254413	CHKB-CPT1B	27.7709	0.0587509	2.98943	0.0838099	>0.99999
ENSG00000119787	ATL2	353.524	0.00836801	2.98893	0.0838356	>0.99999
ENSG00000256294	ZNF225	121.842	0.00866782	2.98829	0.0838689	>0.99999
ENSG00000130770	ATP5IF1	2027.38	-0.0114975	2.98805	0.0838809	>0.99999
ENSG00000122644	ARL4A	248.211	-0.0157461	2.98678	0.083947	>0.99999
ENSG00000167703	SLC43A2	626.934	-0.0236231	2.98488	0.0840458	>0.99999
ENSG00000038945	MSR1	20.8869	-0.0496095	2.98487	0.0840462	>0.99999
ENSG00000158793	NIT1	432.481	-0.00716182	2.98472	0.0840539	>0.99999
ENSG00000139178	C1RL	1080.75	-0.0133929	2.98428	0.0840765	>0.99999
ENSG00000141505	ASGR1	30.8787	0.025829	2.98421	0.0840801	>0.99999
ENSG00000260537		67.8041	-0.0539808	2.98289	0.0841489	>0.99999
ENSG00000135111	TBX3	1417.61	0.0217845	2.98154	0.0842192	>0.99999
ENSG00000229124	VIM-AS1	1201.67	-0.0169655	2.98003	0.0842975	>0.99999
ENSG00000130540	SULT4A1	16.9246	0.0449304	2.97973	0.0843135	>0.99999
ENSG00000158270	COLEC12	168.999	-0.0336298	2.97697	0.0844575	>0.99999
ENSG00000119917	IFIT3	611.714	-0.0406953	2.9764	0.0844868	>0.99999
ENSG00000205903	ZNF316	1171.45	0.00985614	2.97241	0.0846957	>0.99999
ENSG00000122965	RBM19	1284.89	0.00670576	2.97103	0.0847678	>0.99999
ENSG00000188460	ACTBP11	34.6874	-0.0188436	2.96933	0.0848571	>0.99999
ENSG00000136098	NEK3	189.93	0.0135183	2.96882	0.0848838	>0.99999
ENSG00000157077	ZFYVE9	692.352	0.00910932	2.96735	0.0849608	>0.99999
ENSG00000184584	STING1	1785.74	-0.0164134	2.96734	0.0849616	>0.99999
ENSG00000243155		16.5431	0.0209294	2.96715	0.0849714	>0.99999
ENSG00000105808	RASA4	392.821	-0.0295064	2.96715	0.0849717	>0.99999
ENSG00000145088	EAF2	19.2948	-0.0215034	2.96668	0.084996	>0.99999
ENSG00000180921	FAM83H	410.562	0.0254744	2.96466	0.0851022	>0.99999
ENSG00000241288	LINC02614	110.488	0.0217422	2.96339	0.0851695	>0.99999
ENSG00000282851	BISPR	13.9186	-0.0409676	2.96336	0.0851709	>0.99999
ENSG00000137460	FHDC1	91.9638	0.0317544	2.96255	0.0852133	>0.99999
ENSG00000185100	ADSS1	114.406	0.023069	2.96156	0.0852654	>0.99999
ENSG00000182165	TP53TG1	182.635	-0.0183794	2.95828	0.0854389	>0.99999
ENSG00000130669	PAK4	1609.49	-0.0128871	2.95697	0.085508	>0.99999
ENSG00000234160		13.7038	0.0228571	2.95648	0.085534	>0.99999
ENSG00000087157	PGS1	574.098	0.00824768	2.95601	0.085559	>0.99999
ENSG00000232229	LINC00865	22.2127	0.0251959	2.95499	0.0856127	>0.99999
ENSG00000175334	BANF1	2033.21	-0.0117482	2.95234	0.0857534	>0.99999
ENSG00000152520	PAN3	426.035	0.00813867	2.95221	0.08576	>0.99999
ENSG00000134255	CEPT1	434.475	0.00782924	2.95191	0.085776	>0.99999
ENSG00000162735	PEX19	960.827	-0.0112259	2.95108	0.0858201	>0.99999
ENSG00000197696	NMB	149.374	0.0162018	2.94947	0.0859057	>0.99999
ENSG00000107902	LHPP	250.158	-0.0167276	2.94871	0.0859461	>0.99999
ENSG00000129749	CHRNA10	19.8342	0.0220127	2.94537	0.0861241	>0.99999
ENSG00000274808	TBC1D3B	57.6276	0.0220303	2.94498	0.0861448	>0.99999
ENSG00000147454	SLC25A37	1795.52	0.0143677	2.94347	0.0862251	>0.99999
ENSG00000247373	TMED2-DT	53.4851	0.0134292	2.94331	0.0862338	>0.99999
ENSG00000023041	ZDHHC6	579.154	0.009452	2.9428	0.0862611	>0.99999
ENSG00000008382	MPND	191.065	-0.0130439	2.94082	0.0863669	>0.99999
ENSG00000099204	ABLIM1	407.998	-0.0237676	2.93666	0.0865897	>0.99999
ENSG00000197343	ZNF655	1125.79	0.00721441	2.93546	0.0866541	>0.99999
ENSG00000108786	HSD17B1	62.0085	0.0252691	2.93504	0.0866767	>0.99999
ENSG00000176714	CCDC121	23.0896	-0.0207741	2.9348	0.0866896	>0.99999
ENSG00000188690	UROS	1374.11	-0.00633753	2.93479	0.08669	>0.99999
ENSG00000197594	ENPP1	585.599	-0.0244261	2.93478	0.0866907	>0.99999
ENSG00000213588	ZBTB9	198.202	0.0096552	2.93281	0.0867963	>0.99999
ENSG00000261609	GAN	392.044	0.0114689	2.93132	0.0868764	>0.99999
ENSG00000223496	EXOSC6	1185.51	0.0156077	2.92895	0.0870039	>0.99999
ENSG00000064393	HIPK2	2123.32	0.0159113	2.92732	0.0870922	>0.99999
ENSG00000271862		12.5247	0.0212424	2.92497	0.0872189	>0.99999
ENSG00000203760	CENPW	61.9792	-0.0313	2.92429	0.0872558	>0.99999
ENSG00000171109	MFN1	1480.84	0.00588068	2.9218	0.0873905	>0.99999
ENSG00000104312	RIPK2	723.027	0.0121001	2.92068	0.0874508	>0.99999
ENSG00000162377	COA7	492.27	0.0088056	2.92047	0.0874624	>0.99999
ENSG00000089916	GPATCH2L	828.549	0.00962969	2.91565	0.0877242	>0.99999
ENSG00000152402	GUCY1A2	27.2114	0.0384813	2.9152	0.0877483	>0.99999
ENSG00000281649	EBLN3P	941.57	0.00990557	2.91419	0.0878035	>0.99999
ENSG00000251580	LINC02482	16.8643	-0.0260342	2.91403	0.0878123	>0.99999
ENSG00000146802	TMEM168	376.754	0.00977988	2.91329	0.0878523	>0.99999
ENSG00000180304	OAZ2	1669.55	-0.00665471	2.91247	0.0878973	>0.99999
ENSG00000175866	BAIAP2	689.232	-0.0104216	2.91093	0.087981	>0.99999
ENSG00000115963	RND3	9280.58	0.0246914	2.91041	0.0880093	>0.99999
ENSG00000212978	C2orf74-DT	166.21	-0.0125292	2.90944	0.0880623	>0.99999
ENSG00000154380	ENAH	5514.2	-0.0176291	2.90884	0.0880954	>0.99999
ENSG00000254806	SYS1-DBNDD2	22.6717	0.0345767	2.90774	0.0881554	>0.99999
ENSG00000273398		11.5898	-0.0811173	2.90656	0.08822	>0.99999
ENSG00000164039	BDH2	673.483	-0.0120889	2.90468	0.0883226	>0.99999
ENSG00000094804	CDC6	157.154	0.0385079	2.90468	0.0883231	>0.99999
ENSG00000120662	MTRF1	160.156	0.010192	2.90445	0.0883356	>0.99999
ENSG00000271698		15.6202	0.0348292	2.90408	0.0883557	>0.99999
ENSG00000164283	ESM1	124.353	0.0614032	2.90354	0.0883854	>0.99999
ENSG00000095002	MSH2	354.035	0.0152151	2.90343	0.0883912	>0.99999
ENSG00000187838	PLSCR3	2648.61	-0.00954499	2.90232	0.0884521	>0.99999
ENSG00000185684	EP400P1	482.986	0.0145263	2.90224	0.0884563	>0.99999
ENSG00000144283	PKP4	1497.89	0.0114237	2.90213	0.0884625	>0.99999
ENSG00000188002	PDCD6P1	112.758	0.0188837	2.90177	0.0884823	>0.99999
ENSG00000170004	CHD3	7781.96	-0.00877264	2.90107	0.0885206	>0.99999
ENSG00000167632	TRAPPC9	551.377	-0.00845388	2.89999	0.0885801	>0.99999
ENSG00000223501	VPS52	1050.36	-0.00701688	2.89968	0.0885971	>0.99999
ENSG00000173928	SWSAP1	40.4014	-0.0124409	2.89785	0.0886975	>0.99999
ENSG00000170522	ELOVL6	1505.34	0.0148186	2.89712	0.0887378	>0.99999
ENSG00000079999	KEAP1	1740.36	0.00745307	2.89666	0.0887636	>0.99999
ENSG00000196535	MYO18A	1923.25	-0.0094849	2.89558	0.0888226	>0.99999
ENSG00000169946	ZFPM2	391.68	-0.0234103	2.89534	0.0888362	>0.99999
ENSG00000277879		22.2824	0.019295	2.89521	0.0888431	>0.99999
ENSG00000236682	MAP3K2-DT	42.5094	0.049608	2.89513	0.0888479	>0.99999
ENSG00000247317	LY6E-DT	10.8626	-0.0344302	2.89368	0.0889276	>0.99999
ENSG00000117600	PLPPR4	17.5793	-0.0360632	2.89058	0.089099	>0.99999
ENSG00000105483	CARD8	305.43	-0.00786244	2.88964	0.0891506	>0.99999
ENSG00000132359	RAP1GAP2	24.0838	-0.0498622	2.8891	0.089181	>0.99999
ENSG00000162144	CYB561A3	1537.36	0.0138351	2.88888	0.0891927	>0.99999
ENSG00000278949		13.8269	0.0288585	2.88752	0.0892685	>0.99999
ENSG00000197128	ZNF772	88.0888	-0.0141397	2.8855	0.0893804	>0.99999
ENSG00000260948		24.3616	0.0286124	2.88459	0.089431	>0.99999
ENSG00000165118	C9orf64	219.164	0.0134824	2.88339	0.0894976	>0.99999
ENSG00000130821	SLC6A8	1940.04	0.0131835	2.88338	0.0894978	>0.99999
ENSG00000146457	WTAP	2233.27	0.0192703	2.88264	0.089539	>0.99999
ENSG00000003147	ICA1	29.7734	-0.0430437	2.88162	0.0895956	>0.99999
ENSG00000164951	PDP1	1191.79	0.0180351	2.88021	0.0896742	>0.99999
ENSG00000213185	FAM24B	23.5463	-0.0231178	2.87925	0.0897277	>0.99999
ENSG00000189043	NDUFA4	2624.75	-0.00963873	2.87923	0.0897287	>0.99999
ENSG00000130600	H19	257.384	-0.0153318	2.87644	0.0898847	>0.99999
ENSG00000232653	GOLGA8N	154.474	0.0173083	2.87545	0.0899399	>0.99999
ENSG00000129559	NEDD8	3043.99	-0.00614504	2.87449	0.0899933	>0.99999
ENSG00000198513	ATL1	263.455	-0.0202014	2.87313	0.0900695	>0.99999
ENSG00000132382	MYBBP1A	3038.41	0.00939471	2.87147	0.0901626	>0.99999
ENSG00000109854	HTATIP2	445.866	0.0151297	2.87097	0.0901907	>0.99999
ENSG00000186919	ZACN	34.0401	-0.0173035	2.87072	0.0902047	>0.99999
ENSG00000073169	SELENOO	663.723	0.00939008	2.86803	0.0903552	>0.99999
ENSG00000196422	PPP1R26	718.293	0.011305	2.86774	0.0903719	>0.99999
ENSG00000037965	HOXC8	1390.2	-0.0146117	2.86669	0.0904308	>0.99999
ENSG00000120889	TNFRSF10B	5938.39	0.0114091	2.86637	0.0904486	>0.99999
ENSG00000214402	LCNL1	177.715	0.053361	2.86636	0.0904491	>0.99999
ENSG00000269713	NBPF9	1427.81	0.0108537	2.866	0.0904693	>0.99999
ENSG00000172493	AFF1	1424.66	0.021838	2.86437	0.090561	>0.99999
ENSG00000177613	CSTF2T	528.175	-0.0122088	2.86377	0.0905951	>0.99999
ENSG00000126883	NUP214	1466.93	-0.00750894	2.86366	0.0906012	>0.99999
ENSG00000206535	LNP1	30.3255	-0.0229219	2.8636	0.0906046	>0.99999
ENSG00000255363	LINC02757	13.2287	0.0253218	2.86329	0.0906218	>0.99999
ENSG00000169583	CLIC3	629.551	-0.0343842	2.86239	0.0906727	>0.99999
ENSG00000166035	LIPC	18.729	0.0429598	2.86139	0.0907289	>0.99999
ENSG00000114251	WNT5A	1977.49	0.0313427	2.86063	0.0907721	>0.99999
ENSG00000197712	FAM114A1	4031.13	-0.00840804	2.86004	0.090805	>0.99999
ENSG00000175602	CCDC85B	1694.29	-0.0150351	2.85526	0.0910757	>0.99999
ENSG00000237753	SLC20A1-DT	36.3364	0.0234504	2.854	0.0911468	>0.99999
ENSG00000197653	DNAH10	45.893	0.0486132	2.85385	0.0911556	>0.99999
ENSG00000149633	KIAA1755	21.7742	-0.0368717	2.85363	0.091168	>0.99999
ENSG00000273373	SLC16A4-AS1	23.2242	0.0254445	2.85224	0.0912467	>0.99999
ENSG00000168811	IL12A	56.5443	0.0395893	2.85216	0.0912512	>0.99999
ENSG00000236778	INTS6-AS1	21.3618	0.025353	2.8511	0.0913113	>0.99999
ENSG00000133985	TTC9	12.7716	-0.0564957	2.85075	0.0913315	>0.99999
ENSG00000105877	DNAH11	42.9774	-0.0532528	2.84956	0.0913989	>0.99999
ENSG00000106701	FSD1L	54.382	0.0178193	2.8462	0.0915903	>0.99999
ENSG00000164022	AIMP1	861.11	0.00596511	2.84614	0.0915939	>0.99999
ENSG00000204991	SPIRE2	136.642	0.0148264	2.84527	0.0916432	>0.99999
ENSG00000131797	CLUHP3	115.188	0.0132568	2.84516	0.0916493	>0.99999
ENSG00000185946	RNPC3	243.581	0.0117802	2.84498	0.0916597	>0.99999
ENSG00000280128		286.983	0.0134666	2.84453	0.0916855	>0.99999
ENSG00000138074	SLC5A6	672.999	0.00968477	2.84412	0.0917088	>0.99999
ENSG00000172058	SERF1A	26.4607	0.0661014	2.84266	0.0917922	>0.99999
ENSG00000162511	LAPTM5	10.9497	-0.0365658	2.84043	0.0919197	>0.99999
ENSG00000162695	SLC30A7	1224.84	0.0108654	2.83769	0.0920765	>0.99999
ENSG00000270021		11.6864	-0.0250324	2.83564	0.0921939	>0.99999
ENSG00000116337	AMPD2	3259.12	0.00723329	2.83455	0.0922567	>0.99999
ENSG00000172348	RCAN2	78.7207	-0.0471818	2.83361	0.0923105	>0.99999
ENSG00000121900	TMEM54	519.47	-0.0132467	2.83328	0.0923298	>0.99999
ENSG00000166337	TAF10	1809.01	-0.0119956	2.83322	0.0923333	>0.99999
ENSG00000134910	STT3A	8694.54	0.0100906	2.83289	0.0923519	>0.99999
ENSG00000211445	GPX3	87.9595	-0.0354459	2.83226	0.0923885	>0.99999
ENSG00000130751	NPAS1	95.5663	-0.0309986	2.83163	0.0924245	>0.99999
ENSG00000099795	NDUFB7	1661.35	-0.00818329	2.83132	0.0924423	>0.99999
ENSG00000180190	TDRP	200.724	0.0135311	2.83057	0.0924858	>0.99999
ENSG00000273619		27.8213	-0.016106	2.82957	0.0925431	>0.99999
ENSG00000125995	ROMO1	1048.96	-0.0107173	2.82823	0.0926206	>0.99999
ENSG00000139117	CPNE8	111.173	0.0262131	2.82784	0.0926429	>0.99999
ENSG00000107404	DVL1	2173.69	0.00931064	2.82764	0.0926543	>0.99999
ENSG00000203778	FAM229B	219.55	-0.0108661	2.82469	0.092825	>0.99999
ENSG00000134278	SPIRE1	1168.82	0.0148593	2.81926	0.0931395	>0.99999
ENSG00000161328	LRRC56	76.0038	0.0189231	2.81869	0.0931725	>0.99999
ENSG00000182870	GALNT9	18.261	0.0434304	2.81594	0.0933324	>0.99999
ENSG00000260751		18.4362	0.0230382	2.81504	0.0933848	>0.99999
ENSG00000147894	C9orf72	88.3422	0.0150124	2.81437	0.0934234	>0.99999
ENSG00000100427	MLC1	52.4289	0.0470456	2.81276	0.0935176	>0.99999
ENSG00000154319	FAM167A	292.494	0.0292526	2.81235	0.0935414	>0.99999
ENSG00000092931	MFSD11	547.655	0.0097288	2.80808	0.0937904	>0.99999
ENSG00000214338	SOGA3	83.8416	-0.0244786	2.80785	0.0938042	>0.99999
ENSG00000283245		612.588	-0.0139011	2.80616	0.0939029	>0.99999
ENSG00000099817	POLR2E	4131.06	-0.0106014	2.80316	0.0940786	>0.99999
ENSG00000270127		21.2777	0.0424612	2.80155	0.0941735	>0.99999
ENSG00000141568	FOXK2	2351.61	0.00769324	2.80118	0.0941949	>0.99999
ENSG00000279267		71.136	0.0163485	2.80117	0.0941957	>0.99999
ENSG00000249590		17.0461	-0.0517545	2.79911	0.0943166	>0.99999
ENSG00000162298	SYVN1	2666.61	0.0143241	2.79676	0.0944552	>0.99999
ENSG00000137504	CREBZF	742.813	0.00768666	2.79511	0.0945522	>0.99999
ENSG00000261490		113.938	0.0182465	2.79474	0.0945743	>0.99999
ENSG00000147439	BIN3	594.213	0.008713	2.78895	0.0949163	>0.99999
ENSG00000125845	BMP2	75.9771	0.0354083	2.78698	0.0950332	>0.99999
ENSG00000021762	OSBPL5	1157.33	-0.00859207	2.78679	0.0950446	>0.99999
ENSG00000171295	ZNF440	167.587	0.0101105	2.78664	0.0950535	>0.99999
ENSG00000174804	FZD4	782.741	-0.0201996	2.78452	0.0951792	>0.99999
ENSG00000148180	GSN	4598.86	-0.0123807	2.78269	0.0952882	>0.99999
ENSG00000089220	PEBP1	5088.35	-0.00684594	2.78253	0.0952975	>0.99999
ENSG00000136997	MYC	2167.12	0.0154193	2.782	0.0953293	>0.99999
ENSG00000243978	RTL9	37.2229	0.0296136	2.78134	0.0953684	>0.99999
ENSG00000184838	PRR16	270.651	-0.0183266	2.78016	0.0954385	>0.99999
ENSG00000172889	EGFL7	1134.84	0.0155296	2.77955	0.0954749	>0.99999
ENSG00000130702	LAMA5	2477.45	-0.0339801	2.77738	0.0956042	>0.99999
ENSG00000163818	LZTFL1	412.475	0.0116875	2.77554	0.0957143	>0.99999
ENSG00000204052	LRRC73	30.4844	0.0215859	2.77493	0.0957506	>0.99999
ENSG00000142867	BCL10	516.019	0.00932646	2.7747	0.0957645	>0.99999
ENSG00000270011	ZNF559-ZNF177	10.4776	0.0347016	2.77422	0.0957934	>0.99999
ENSG00000233864		118.757	-0.0188592	2.77416	0.0957967	>0.99999
ENSG00000159335	PTMS	9685.05	-0.0136914	2.77327	0.0958502	>0.99999
ENSG00000161011	SQSTM1	48144.9	0.0187183	2.77271	0.095884	>0.99999
ENSG00000135241	PNPLA8	571.234	0.00968528	2.77265	0.0958876	>0.99999
ENSG00000197497	ZNF665	61.3719	0.0158493	2.77213	0.0959183	>0.99999
ENSG00000054654	SYNE2	551.73	-0.0174401	2.77134	0.0959656	>0.99999
ENSG00000100139	MICALL1	2451.37	0.0110966	2.77032	0.0960272	>0.99999
ENSG00000164574	GALNT10	6804.14	-0.0157164	2.76954	0.0960739	>0.99999
ENSG00000176472	ZNF575	95.781	-0.0160455	2.76789	0.0961727	>0.99999
ENSG00000185652	NTF3	350.33	-0.015685	2.76743	0.0962005	>0.99999
ENSG00000128739	SNRPN	3748.78	-0.0108294	2.76426	0.0963912	>0.99999
ENSG00000163626	COX18	285.762	-0.0069785	2.76292	0.0964719	>0.99999
ENSG00000230590	FTX	80.2756	-0.0144837	2.76238	0.0965047	>0.99999
ENSG00000105341	DMAC2	1003.87	-0.0072609	2.76123	0.0965742	>0.99999
ENSG00000169594	BNC1	1396.89	0.0180826	2.76093	0.096592	>0.99999
ENSG00000153815	CMIP	1787.44	-0.00967354	2.76039	0.0966245	>0.99999
ENSG00000158856	DMTN	28.5146	-0.0185523	2.76036	0.0966263	>0.99999
ENSG00000157538	VPS26C	1466.1	0.00886135	2.75981	0.0966597	>0.99999
ENSG00000248698	LINC01085	9.96585	0.0267248	2.75976	0.096663	>0.99999
ENSG00000134698	AGO4	350.062	0.0102236	2.75852	0.0967378	>0.99999
ENSG00000134569	LRP4	153.414	-0.0308238	2.75824	0.0967544	>0.99999
ENSG00000104957	YJU2B	655.318	0.00887291	2.75675	0.0968451	>0.99999
ENSG00000268895	A1BG-AS1	186.61	0.0268266	2.75573	0.0969064	>0.99999
ENSG00000197361	FBXL22	20.6849	-0.0350997	2.7557	0.0969081	>0.99999
ENSG00000109466	KLHL2	279.83	0.0113732	2.75565	0.0969112	>0.99999
ENSG00000005238	FAM214B	2993.22	0.0121086	2.75452	0.0969802	>0.99999
ENSG00000184719	RNLS	100.926	-0.0116599	2.7545	0.0969813	>0.99999
ENSG00000198440	ZNF583	107.507	0.0109382	2.75439	0.096988	>0.99999
ENSG00000073584	SMARCE1	2571.49	-0.00717308	2.7537	0.0970294	>0.99999
ENSG00000094841	UPRT	153.629	-0.00732843	2.75175	0.0971483	>0.99999
ENSG00000004478	FKBP4	2101.6	0.00808743	2.75022	0.0972413	>0.99999
ENSG00000166902	MRPL16	464.296	-0.0114146	2.7499	0.0972605	>0.99999
ENSG00000067365	METTL22	611.054	-0.00869657	2.74926	0.0972995	>0.99999
ENSG00000197021	EOLA2	465.84	0.00661059	2.74875	0.0973303	>0.99999
ENSG00000170638	TRABD	1453.88	0.00887927	2.74762	0.0973992	>0.99999
ENSG00000234353		15.1303	0.0461189	2.74646	0.0974698	>0.99999
ENSG00000151690	MFSD6	506.933	-0.0249287	2.74536	0.0975372	>0.99999
ENSG00000136444	RSAD1	641.399	0.00845003	2.74493	0.0975636	>0.99999
ENSG00000151623	NR3C2	184.293	0.031755	2.74328	0.0976644	>0.99999
ENSG00000163393	SLC22A15	292.394	0.0241215	2.74284	0.0976912	>0.99999
ENSG00000146576	INTS15	541.659	0.00824863	2.74256	0.0977081	>0.99999
ENSG00000179388	EGR3	17.8893	-0.0534794	2.74141	0.0977785	>0.99999
ENSG00000144406	UNC80	26.1715	0.0142989	2.74055	0.0978311	>0.99999
ENSG00000070614	NDST1	12060.1	-0.0135285	2.73963	0.0978876	>0.99999
ENSG00000109519	GRPEL1	794.111	0.00870763	2.73703	0.098047	>0.99999
ENSG00000174606	ANGEL2	374.128	0.00765103	2.73694	0.0980523	>0.99999
ENSG00000276045	ORAI1	785.831	0.0125267	2.73508	0.0981668	>0.99999
ENSG00000169085	VXN	9.87996	-0.0311473	2.7345	0.0982024	>0.99999
ENSG00000231887	PRH1	16.1166	-0.0230724	2.73336	0.0982723	>0.99999
ENSG00000255237		13.5009	0.0259407	2.7326	0.0983191	>0.99999
ENSG00000215374	FAM66B	40.874	-0.0239189	2.73221	0.098343	>0.99999
ENSG00000139567	ACVRL1	112.662	-0.0274726	2.7317	0.0983746	>0.99999
ENSG00000252690		27.8999	0.025526	2.72973	0.0984956	>0.99999
ENSG00000176868		23.8754	-0.0180647	2.7295	0.09851	>0.99999
ENSG00000125843	AP5S1	468.728	-0.00655468	2.72897	0.0985431	>0.99999
ENSG00000104823	ECH1	1069.54	-0.011274	2.72737	0.0986416	>0.99999
ENSG00000185344	ATP6V0A2	639.183	0.0115675	2.72654	0.098693	>0.99999
ENSG00000104332	SFRP1	1382.51	-0.0469018	2.72273	0.0989286	>0.99999
ENSG00000239200	RPL22P20	28.4775	-0.0161571	2.72104	0.0990337	>0.99999
ENSG00000251022	THAP9-AS1	449.179	-0.0163832	2.72058	0.0990622	>0.99999
ENSG00000217555	CKLF	300.811	-0.00864534	2.71956	0.0991251	>0.99999
ENSG00000148154	UGCG	2641.03	0.0122588	2.71876	0.0991752	>0.99999
ENSG00000164946	FREM1	14.3711	0.0344399	2.71825	0.099207	>0.99999
ENSG00000138629	UBL7	882.719	-0.0074083	2.71633	0.0993263	>0.99999
ENSG00000170191	NANP	289.039	0.0106542	2.71544	0.0993813	>0.99999
ENSG00000101842	VSIG1	19.5526	0.0191584	2.71329	0.0995153	>0.99999
ENSG00000116030	SUMO1	1949.22	-0.0074863	2.71013	0.0997131	>0.99999
ENSG00000134882	UBAC2	1344.32	0.00902094	2.70972	0.0997383	>0.99999
ENSG00000241549	GUSBP2	15.1979	-0.0262128	2.7091	0.0997775	>0.99999
ENSG00000137720	C11orf1	132.996	-0.0138064	2.70793	0.0998505	>0.99999
ENSG00000254870	ATP6V1G2-DDX39B	492.384	0.0325545	2.70759	0.0998719	>0.99999
ENSG00000088538	DOCK3	27.7552	0.0253241	2.70715	0.0998993	>0.99999
ENSG00000189221	MAOA	85.4667	-0.027917	2.70598	0.0999725	>0.99999
ENSG00000260966		35.5263	0.0196978	2.70339	0.100135	>0.99999
ENSG00000205336	ADGRG1	295.806	0.0255664	2.70272	0.100177	>0.99999
ENSG00000196923	PDLIM7	12698.4	-0.0122454	2.70165	0.100245	>0.99999
ENSG00000198074	AKR1B10	75.6439	0.0478147	2.70028	0.100331	>0.99999
ENSG00000176887	SOX11	715.225	-0.0270528	2.69905	0.100408	>0.99999
ENSG00000219665	ZNF433-AS1	109.663	0.0124836	2.69838	0.10045	>0.99999
ENSG00000149557	FEZ1	916.904	0.0124707	2.6966	0.100563	>0.99999
ENSG00000268996	MAN1B1-DT	61.1635	-0.0159894	2.69249	0.100822	>0.99999
ENSG00000155189	AGPAT5	247.282	0.0141929	2.69228	0.100836	>0.99999
ENSG00000107968	MAP3K8	213.245	-0.0266039	2.69179	0.100866	>0.99999
ENSG00000149474	KAT14	366.382	0.00928676	2.69032	0.100959	>0.99999
ENSG00000145494	NDUFS6	1233.41	-0.00765173	2.69008	0.100975	>0.99999
ENSG00000088367	EPB41L1	1592.77	-0.00880221	2.68818	0.101095	>0.99999
ENSG00000242125	SNHG3	911.711	0.0124628	2.6866	0.101195	>0.99999
ENSG00000198046	ZNF667	139.321	0.0233288	2.68648	0.101203	>0.99999
ENSG00000106123	EPHB6	147.25	0.0302953	2.68472	0.101315	>0.99999
ENSG00000110002	VWA5A	102.364	-0.0305185	2.68368	0.101381	>0.99999
ENSG00000103150	MLYCD	261.301	0.00871998	2.68139	0.101527	>0.99999
ENSG00000148498	PARD3	1206.2	0.00804732	2.68028	0.101598	>0.99999
ENSG00000184402	SS18L1	340.286	0.00795852	2.67881	0.101692	>0.99999
ENSG00000103199	ZNF500	349.607	0.0075926	2.67838	0.101719	>0.99999
ENSG00000006625	GGCT	452.828	-0.0102974	2.67774	0.10176	>0.99999
ENSG00000269609	C10orf95-AS1	57.9203	0.0199093	2.67657	0.101835	>0.99999
ENSG00000275074	NUDT18	307.913	-0.0100178	2.67631	0.101852	>0.99999
ENSG00000183283	DAZAP2	2885.51	-0.00660113	2.67441	0.101973	>0.99999
ENSG00000107104	KANK1	946.759	-0.0151892	2.67294	0.102067	>0.99999
ENSG00000130764	LRRC47	1176.83	0.00505578	2.67266	0.102085	>0.99999
ENSG00000157741	UBN2	310.166	0.0110187	2.67129	0.102173	>0.99999
ENSG00000099860	GADD45B	1157.62	-0.0183318	2.66967	0.102277	>0.99999
ENSG00000185238	PRMT3	288.682	0.00932117	2.66956	0.102284	>0.99999
ENSG00000089195	TRMT6	385.521	0.00968996	2.66682	0.102461	>0.99999
ENSG00000128965	CHAC1	1004.61	-0.0260049	2.66651	0.10248	>0.99999
ENSG00000108518	PFN1	39111.4	-0.0114419	2.6662	0.1025	>0.99999
ENSG00000140854	KATNB1	667.503	0.00756811	2.66524	0.102562	>0.99999
ENSG00000136104	RNASEH2B	288.428	0.0162272	2.66521	0.102564	>0.99999
ENSG00000152778	IFIT5	430.4	-0.0138049	2.6647	0.102597	>0.99999
ENSG00000132109	TRIM21	393.667	-0.0104791	2.66336	0.102684	>0.99999
ENSG00000144659	SLC25A38	830.838	0.00605196	2.66244	0.102743	>0.99999
ENSG00000167536	DHRS13	76.4554	0.0151734	2.66196	0.102774	>0.99999
ENSG00000162241	SLC25A45	88.3485	-0.0131598	2.66165	0.102794	>0.99999
ENSG00000141034	GID4	483.951	0.0126057	2.66093	0.10284	>0.99999
ENSG00000143061	IGSF3	134.093	0.0367925	2.66031	0.102881	>0.99999
ENSG00000280152		79.9339	0.0293169	2.65854	0.102995	>0.99999
ENSG00000247796	MOCS2-DT	49.3629	-0.0161401	2.65774	0.103047	>0.99999
ENSG00000254486	LINC02547	10.3688	0.0356671	2.65704	0.103093	>0.99999
ENSG00000133142	TCEAL4	2966.3	-0.00963671	2.65496	0.103227	>0.99999
ENSG00000136153	LMO7	11240.8	-0.0155058	2.65444	0.103261	>0.99999
ENSG00000257529	RPL36A-HNRNPH2	24.4579	-0.0434025	2.65288	0.103362	>0.99999
ENSG00000148225	WDR31	59.46	0.0145602	2.65221	0.103406	>0.99999
ENSG00000007384	RHBDF1	2371.47	0.00887432	2.6515	0.103452	>0.99999
ENSG00000260114		31.1814	-0.0153241	2.64982	0.103562	>0.99999
ENSG00000114529	C3orf52	272.137	0.0171879	2.64973	0.103568	>0.99999
ENSG00000136244	IL6	1226.55	0.0575173	2.64955	0.103579	>0.99999
ENSG00000226085	UQCRFS1P1	94.4391	-0.0176123	2.64886	0.103624	>0.99999
ENSG00000257122	RRN3P3	175.844	-0.0108121	2.64841	0.103654	>0.99999
ENSG00000165322	ARHGAP12	700.756	0.0100384	2.64638	0.103786	>0.99999
ENSG00000197822	OCLN	58.0077	0.0285058	2.64604	0.103808	>0.99999
ENSG00000100320	RBFOX2	4197.85	-0.00674413	2.64484	0.103887	>0.99999
ENSG00000152484	USP12	617.861	0.00957174	2.64468	0.103897	>0.99999
ENSG00000128683	GAD1	15.5282	0.0509287	2.64399	0.103942	>0.99999
ENSG00000157613	CREB3L1	13151.2	-0.0131775	2.64252	0.104038	>0.99999
ENSG00000153162	BMP6	311.463	-0.0508288	2.6419	0.104079	>0.99999
ENSG00000139263	LRIG3	305.687	-0.0187414	2.64183	0.104084	>0.99999
ENSG00000105287	PRKD2	920.237	-0.00792053	2.64021	0.10419	>0.99999
ENSG00000204941	PSG5	139.308	-0.0580336	2.63963	0.104228	>0.99999
ENSG00000186088	GSAP	142.64	0.0203449	2.63669	0.104421	>0.99999
ENSG00000181016	LSMEM1	18.9644	0.0223018	2.63656	0.104429	>0.99999
ENSG00000255561	FDXACB1	30.1259	-0.0184735	2.63544	0.104503	>0.99999
ENSG00000099326	MZF1	789.64	0.0136933	2.63434	0.104575	>0.99999
ENSG00000230479		24.0045	-0.0312934	2.63135	0.104773	>0.99999
ENSG00000085465	OVGP1	39.5557	0.03423	2.62871	0.104947	>0.99999
ENSG00000017260	ATP2C1	5856.73	0.0141105	2.62749	0.105028	>0.99999
ENSG00000134184	GSTM1	304.554	-0.0367181	2.6266	0.105087	>0.99999
ENSG00000105497	ZNF175	292.852	0.0124873	2.62643	0.105098	>0.99999
ENSG00000158125	XDH	25.0363	0.0380327	2.62524	0.105177	>0.99999
ENSG00000114850	SSR3	9279.34	0.0100213	2.62443	0.10523	>0.99999
ENSG00000261068		9.50004	0.0338649	2.62396	0.105262	>0.99999
ENSG00000158079	PTPDC1	235.641	0.0148768	2.62337	0.105301	>0.99999
ENSG00000275004	ZNF280B	109.003	0.0130165	2.6184	0.105631	>0.99999
ENSG00000250722	SELENOP	16.1472	-0.0607524	2.61838	0.105632	>0.99999
ENSG00000184967	NOC4L	535.211	-0.01276	2.61727	0.105706	>0.99999
ENSG00000177700	POLR2L	4571.25	-0.0107196	2.61553	0.105822	>0.99999
ENSG00000171159	BBLN	1205.33	-0.0113131	2.61431	0.105904	>0.99999
ENSG00000125148	MT2A	14580.8	0.0224094	2.61135	0.106102	>0.99999
ENSG00000157326	DHRS4	572.442	-0.00908209	2.61107	0.10612	>0.99999
ENSG00000272916		81.4622	0.016804	2.6105	0.106158	>0.99999
ENSG00000113441	LNPEP	1258.9	0.0152984	2.6102	0.106178	>0.99999
ENSG00000140157	NIPA2	1688.21	0.00812776	2.61008	0.106186	>0.99999
ENSG00000105613	MAST1	14.5727	-0.0231155	2.60991	0.106197	>0.99999
ENSG00000270673	YTHDF3-DT	9.9996	0.0213511	2.60865	0.106282	>0.99999
ENSG00000114316	USP4	1156.65	-0.00684493	2.60805	0.106322	>0.99999
ENSG00000136169	SETDB2	219.056	0.0175812	2.60796	0.106328	>0.99999
ENSG00000064666	CNN2	19663.2	-0.0120351	2.60785	0.106336	>0.99999
ENSG00000175879	HOXD8	151.656	0.0234973	2.60673	0.106411	>0.99999
ENSG00000198833	UBE2J1	2686.6	0.00940154	2.60399	0.106595	>0.99999
ENSG00000165526	RPUSD4	456.754	0.00768685	2.60243	0.1067	>0.99999
ENSG00000255150	EID3	31.4755	0.0271368	2.60195	0.106732	>0.99999
ENSG00000021355	SERPINB1	440.412	0.0131902	2.59906	0.106927	>0.99999
ENSG00000170390	DCLK2	1153.33	-0.024024	2.59903	0.106929	>0.99999
ENSG00000178409	BEND3	155.348	0.0103157	2.59837	0.106974	>0.99999
ENSG00000120697	ALG5	601.373	0.0106267	2.59828	0.10698	>0.99999
ENSG00000089063	TMEM230	2601.25	-0.00579767	2.59713	0.107057	>0.99999
ENSG00000170364	SETMAR	136.521	-0.0110519	2.59701	0.107066	>0.99999
ENSG00000009830	POMT2	1122.26	0.00848405	2.59666	0.107089	>0.99999
ENSG00000104131	EIF3J	1666.5	0.00674553	2.59524	0.107185	>0.99999
ENSG00000204219	TCEA3	231.076	-0.0218026	2.59485	0.107212	>0.99999
ENSG00000245937	SLC12A2-DT	344.803	-0.0103637	2.59442	0.107241	>0.99999
ENSG00000227051	C14orf132	1100.73	-0.0135429	2.59336	0.107313	>0.99999
ENSG00000170379	TCAF2	61.3426	-0.0259936	2.5932	0.107323	>0.99999
ENSG00000013619	MAMLD1	463.632	-0.0232427	2.59081	0.107485	>0.99999
ENSG00000178229	ZNF543	77.9109	-0.0133666	2.58839	0.10765	>0.99999
ENSG00000278129	ZNF8	296.707	0.00746454	2.58639	0.107785	>0.99999
ENSG00000254602	MIR130AHG	20.9495	-0.0172748	2.58445	0.107918	>0.99999
ENSG00000105767	CADM4	63.2503	-0.019324	2.58391	0.107955	>0.99999
ENSG00000119922	IFIT2	231.093	-0.0317173	2.58381	0.107961	>0.99999
ENSG00000171798	KNDC1	63.6809	0.0387694	2.58277	0.108033	>0.99999
ENSG00000112078	KCTD20	3619.85	-0.0195292	2.58207	0.10808	>0.99999
ENSG00000247627	MTND4P12	28.4462	0.00624153	2.57903	0.108288	>0.99999
ENSG00000081051	AFP	36.7891	0.0265546	2.57902	0.108289	>0.99999
ENSG00000173276	ZBTB21	398.197	0.0123016	2.57864	0.108314	>0.99999
ENSG00000158286	RNF207	799.205	0.0165192	2.57841	0.108331	>0.99999
ENSG00000249459	ZNF286B	95.8145	0.0168089	2.57827	0.10834	>0.99999
ENSG00000073605	GSDMB	301.145	0.0196463	2.57762	0.108385	>0.99999
ENSG00000183801	OLFML1	31.2005	-0.051299	2.57762	0.108385	>0.99999
ENSG00000007341	ST7L	401.464	-0.0133196	2.57405	0.108629	>0.99999
ENSG00000172262	ZNF131	573.339	0.00519477	2.57397	0.108635	>0.99999
ENSG00000185246	PRPF39	590.748	0.0102371	2.57313	0.108692	>0.99999
ENSG00000220785	MTMR9LP	106.837	-0.0230913	2.57148	0.108806	>0.99999
ENSG00000160223	ICOSLG	92.9463	0.0226285	2.57034	0.108884	>0.99999
ENSG00000114450	GNB4	1267.23	-0.0123143	2.5688	0.10899	>0.99999
ENSG00000007866	TEAD3	2264.09	-0.00863563	2.56676	0.109131	>0.99999
ENSG00000174600	CMKLR1	34.7426	0.0723679	2.56601	0.109183	>0.99999
ENSG00000043514	TRIT1	299.622	0.0083194	2.5637	0.109342	>0.99999
ENSG00000196268	ZNF493	63.7168	0.017726	2.56196	0.109463	>0.99999
ENSG00000103642	LACTB	1284.93	-0.0126113	2.56045	0.109567	>0.99999
ENSG00000132297	HHLA1	19.2395	0.0242599	2.55911	0.10966	>0.99999
ENSG00000143409	MINDY1	181.503	-0.0103014	2.55862	0.109694	>0.99999
ENSG00000113790	EHHADH	107.995	-0.0177319	2.55794	0.109741	>0.99999
ENSG00000111266	DUSP16	272.131	0.0126714	2.55712	0.109799	>0.99999
ENSG00000124343	XG	47.4464	-0.0432424	2.55684	0.109818	>0.99999
ENSG00000108379	WNT3	100.848	0.019839	2.5565	0.109842	>0.99999
ENSG00000117500	TMED5	2009.77	0.0104937	2.55494	0.10995	>0.99999
ENSG00000197776	KLHDC1	32.9866	0.0187473	2.55331	0.110064	>0.99999
ENSG00000170537	TMC7	18.4862	-0.0266259	2.55138	0.110198	>0.99999
ENSG00000241313	WWTR1-AS1	9.83474	-0.0230767	2.55129	0.110204	>0.99999
ENSG00000178718	RPP25	742.286	0.020933	2.54898	0.110366	>0.99999
ENSG00000162552	WNT4	26.4989	-0.0535559	2.54878	0.110379	>0.99999
ENSG00000169432	SCN9A	1971.27	-0.0307067	2.54835	0.11041	>0.99999
ENSG00000116132	PRRX1	1158.33	-0.0288353	2.54628	0.110554	>0.99999
ENSG00000132330	SCLY	333.348	0.0108952	2.54475	0.110662	>0.99999
ENSG00000168502	MTCL1	1717.87	-0.00870657	2.54448	0.11068	>0.99999
ENSG00000280211		18.534	-0.0209132	2.54443	0.110684	>0.99999
ENSG00000223403	MEG9	273.503	0.0185849	2.54398	0.110715	>0.99999
ENSG00000113522	RAD50	1734.65	0.00943224	2.54205	0.110851	>0.99999
ENSG00000279923		10.0346	-0.026216	2.53948	0.111031	>0.99999
ENSG00000110237	ARHGEF17	4273.99	-0.0078554	2.53613	0.111267	>0.99999
ENSG00000172273	HINFP	376.742	0.00848899	2.53579	0.111291	>0.99999
ENSG00000171681	ATF7IP	998.808	-0.00841351	2.53466	0.111371	>0.99999
ENSG00000047648	ARHGAP6	27.9826	0.0344409	2.53426	0.111399	>0.99999
ENSG00000157216	SSBP3	1883.55	-0.0196606	2.53405	0.111414	>0.99999
ENSG00000129925	PGAP6	4696.61	-0.010638	2.53256	0.111519	>0.99999
ENSG00000170348	TMED10	7898.04	0.00732457	2.53248	0.111525	>0.99999
ENSG00000165914	TTC7B	764.583	0.00728906	2.53238	0.111532	>0.99999
ENSG00000178773	CPNE7	887.361	0.0273299	2.52828	0.111822	>0.99999
ENSG00000270231	NBPF8	898.806	0.0180337	2.52774	0.11186	>0.99999
ENSG00000136986	DERL1	1886.31	0.00656495	2.5271	0.111906	>0.99999
ENSG00000116852	KIF21B	27.6435	0.0349709	2.52696	0.111916	>0.99999
ENSG00000278834		49.4673	-0.016096	2.52649	0.111949	>0.99999
ENSG00000198131	ZNF544	340.742	0.00807062	2.52447	0.112093	>0.99999
ENSG00000169598	DFFB	148.857	0.00852291	2.52354	0.112158	>0.99999
ENSG00000125378	BMP4	1280.01	-0.0216127	2.52351	0.112161	>0.99999
ENSG00000119559	C19orf25	764.734	0.00781842	2.52267	0.112221	>0.99999
ENSG00000036448	MYOM2	22.7495	0.0361684	2.5217	0.112289	>0.99999
ENSG00000048342	CC2D2A	546.987	-0.00765332	2.5212	0.112325	>0.99999
ENSG00000270804		102.011	0.0139998	2.52008	0.112405	>0.99999
ENSG00000198225	FKBP1C	9.86121	0.0237391	2.51664	0.11265	>0.99999
ENSG00000279753		34.279	-0.025206	2.51601	0.112695	>0.99999
ENSG00000130731	METTL26	1136.57	-0.0121298	2.51573	0.112716	>0.99999
ENSG00000165752	STK32C	216.91	0.0116769	2.51517	0.112755	>0.99999
ENSG00000151611	MMAA	137.506	-0.00928269	2.51454	0.1128	>0.99999
ENSG00000076555	ACACB	96.0527	-0.0149317	2.51368	0.112862	>0.99999
ENSG00000254343		10.5311	-0.0292715	2.51322	0.112895	>0.99999
ENSG00000162616	DNAJB4	1349.72	0.0221497	2.51302	0.112909	>0.99999
ENSG00000132405	TBC1D14	1136.23	0.00520323	2.51235	0.112957	>0.99999
ENSG00000154188	ANGPT1	335.075	-0.0296764	2.51138	0.113027	>0.99999
ENSG00000139343	SNRPF	722.253	-0.0124539	2.51137	0.113028	>0.99999
ENSG00000110721	CHKA	534.673	0.02306	2.51049	0.113091	>0.99999
ENSG00000281657		97.4029	-0.0122315	2.5104	0.113097	>0.99999
ENSG00000274964		15.0466	-0.0192448	2.5097	0.113148	>0.99999
ENSG00000063245	EPN1	5445.09	-0.00858711	2.5093	0.113177	>0.99999
ENSG00000177721	ANXA2R	12.9992	-0.025804	2.50864	0.113224	>0.99999
ENSG00000186666	BCDIN3D	113.722	0.0100259	2.50829	0.113249	>0.99999
ENSG00000274281		85.2683	0.0136023	2.50723	0.113325	>0.99999
ENSG00000186951	PPARA	634.117	0.0128302	2.50722	0.113326	>0.99999
ENSG00000173264	GPR137	894.351	-0.00694958	2.50712	0.113333	>0.99999
ENSG00000183307	TMEM121B	16.4285	-0.0269861	2.50647	0.11338	>0.99999
ENSG00000106263	EIF3B	5528.67	0.00741144	2.50582	0.113427	>0.99999
ENSG00000164405	UQCRQ	1813.07	-0.00889963	2.50531	0.113463	>0.99999
ENSG00000162927	PUS10	141.765	-0.0129646	2.50484	0.113497	>0.99999
ENSG00000172269	DPAGT1	1140.12	0.00759418	2.50469	0.113508	>0.99999
ENSG00000272092		23.5343	-0.0267384	2.50456	0.113517	>0.99999
ENSG00000068912	ERLEC1	2494.21	0.010585	2.50328	0.11361	>0.99999
ENSG00000051523	CYBA	2898.21	-0.0204788	2.50276	0.113647	>0.99999
ENSG00000137825	ITPKA	31.569	0.0414163	2.50146	0.113741	>0.99999
ENSG00000112739	PRPF4B	1233.27	0.00712425	2.50116	0.113763	>0.99999
ENSG00000079462	PAFAH1B3	536.628	-0.0123113	2.50078	0.11379	>0.99999
ENSG00000267102		30.8128	-0.0176136	2.49779	0.114006	>0.99999
ENSG00000133627	ACTR3B	130.823	0.00796646	2.49699	0.114064	>0.99999
ENSG00000188763	FZD9	44.3684	0.016046	2.4961	0.114129	>0.99999
ENSG00000127540	UQCR11	2294.02	-0.008447	2.49566	0.11416	>0.99999
ENSG00000091127	PUS7	307.102	0.0104048	2.49537	0.114181	>0.99999
ENSG00000280383		21.4536	0.0189881	2.49306	0.114349	>0.99999
ENSG00000169223	LMAN2	7228.79	0.00869994	2.49297	0.114356	>0.99999
ENSG00000214029	ZNF891	71.4364	0.0129736	2.49274	0.114373	>0.99999
ENSG00000115355	CCDC88A	816.277	-0.0135431	2.49061	0.114527	>0.99999
ENSG00000151576	QTRT2	395.047	0.0066481	2.49033	0.114548	>0.99999
ENSG00000168970	JMJD7-PLA2G4B	168.612	0.0157061	2.48394	0.115014	>0.99999
ENSG00000260698		12.457	0.0283548	2.48367	0.115034	>0.99999
ENSG00000139323	POC1B	211.648	0.00939314	2.4829	0.11509	>0.99999
ENSG00000126005	MMP24OS	3274.64	-0.0107847	2.48073	0.115249	>0.99999
ENSG00000138071	ACTR2	8265.95	-0.00989296	2.4807	0.115251	>0.99999
ENSG00000213380	COG8	429.592	-0.00636626	2.48057	0.11526	>0.99999
ENSG00000142669	SH3BGRL3	14804.9	-0.016091	2.48056	0.115261	>0.99999
ENSG00000184786	DYNLT2	20.4675	0.0199988	2.47732	0.115499	>0.99999
ENSG00000147509	RGS20	52.435	0.0237253	2.47691	0.115529	>0.99999
ENSG00000174173	TRMT10C	370.674	0.00687724	2.47514	0.115659	>0.99999
ENSG00000255036	SUGT1P4-STRA6LP-CCDC180	37.4294	0.0263272	2.47506	0.115665	>0.99999
ENSG00000144596	GRIP2	17.5814	-0.0533905	2.47422	0.115727	>0.99999
ENSG00000107581	EIF3A	10429	0.0079228	2.47212	0.115882	>0.99999
ENSG00000120686	UFM1	2036.86	0.00668455	2.47187	0.1159	>0.99999
ENSG00000174799	CEP135	195.676	0.0107798	2.47094	0.115968	>0.99999
ENSG00000125520	SLC2A4RG	1819.85	-0.0150999	2.47085	0.115975	>0.99999
ENSG00000163521	GLB1L	304.74	0.0190107	2.47071	0.115985	>0.99999
ENSG00000104687	GSR	2051.54	0.0125183	2.47019	0.116024	>0.99999
ENSG00000166483	WEE1	529.878	-0.0121563	2.46934	0.116087	>0.99999
ENSG00000213857	ACTBP15	12.2806	-0.0228771	2.4685	0.116149	>0.99999
ENSG00000247572	CKMT2-AS1	107.615	0.0206089	2.46803	0.116183	>0.99999
ENSG00000161298	ZNF382	86.597	0.0146113	2.46548	0.116372	>0.99999
ENSG00000162105	SHANK2	236.248	0.0216227	2.46531	0.116385	>0.99999
ENSG00000151303		15.2976	0.0272387	2.46471	0.116429	>0.99999
ENSG00000116106	EPHA4	1058.61	-0.018637	2.46412	0.116473	>0.99999
ENSG00000148841	ITPRIP	2740.73	-0.0116749	2.46372	0.116503	>0.99999
ENSG00000154175	ABI3BP	4171.96	0.0522175	2.46371	0.116503	>0.99999
ENSG00000056277	ZNF280C	87.2488	-0.0112042	2.46355	0.116515	>0.99999
ENSG00000128422	KRT17	59.8107	-0.028248	2.46267	0.116581	>0.99999
ENSG00000104728	ARHGEF10	1633.69	0.0059039	2.46179	0.116646	>0.99999
ENSG00000185359	HGS	4327.52	0.00724575	2.46145	0.116671	>0.99999
ENSG00000124523	SIRT5	225.258	0.00796762	2.46127	0.116685	>0.99999
ENSG00000226026	RWDD3-DT	10.5603	-0.0258355	2.46052	0.11674	>0.99999
ENSG00000095209	TMEM38B	177.691	0.0169242	2.4594	0.116823	>0.99999
ENSG00000177683	THAP5	324.853	0.0110641	2.4591	0.116846	>0.99999
ENSG00000138834	MAPK8IP3	2570.83	0.0124514	2.45897	0.116856	>0.99999
ENSG00000175592	FOSL1	2588.01	0.0217816	2.45862	0.116881	>0.99999
ENSG00000205542	TMSB4X	37743.4	-0.00953735	2.45858	0.116884	>0.99999
ENSG00000123892	RAB38	15.2933	-0.0316396	2.45823	0.116911	>0.99999
ENSG00000163382	NAXE	985.007	-0.00963744	2.45511	0.117143	>0.99999
ENSG00000125485	DDX31	413.679	0.0063177	2.45387	0.117235	>0.99999
ENSG00000274605	PCCA-DT	43.238	-0.0150035	2.4521	0.117368	>0.99999
ENSG00000247556	OIP5-AS1	1067.47	0.0139515	2.45092	0.117456	>0.99999
ENSG00000168026	TTC21A	83.4107	0.017668	2.44983	0.117538	>0.99999
ENSG00000278709	NKILA	33.0567	-0.0217601	2.44942	0.117568	>0.99999
ENSG00000185630	PBX1	882.049	-0.0245403	2.44864	0.117627	>0.99999
ENSG00000157168	NRG1	805.358	0.0320886	2.44717	0.117737	>0.99999
ENSG00000166436	TRIM66	285.531	0.0112308	2.44578	0.117841	>0.99999
ENSG00000131475	VPS25	1014.93	-0.00744506	2.44477	0.117917	>0.99999
ENSG00000169715	MT1E	1468.99	0.0172591	2.44365	0.118002	>0.99999
ENSG00000188015	S100A3	45.7	-0.0332523	2.44344	0.118017	>0.99999
ENSG00000166341	DCHS1	577.896	-0.042477	2.44208	0.118119	>0.99999
ENSG00000110906	KCTD10	3198.95	-0.00973839	2.44088	0.11821	>0.99999
ENSG00000100221	JOSD1	1749.39	0.00778342	2.43859	0.118383	>0.99999
ENSG00000131389	SLC6A6	2831.76	-0.0234666	2.43689	0.118511	>0.99999
ENSG00000111859	NEDD9	1031.93	-0.0189332	2.43678	0.118519	>0.99999
ENSG00000198668	CALM1	4015.82	-0.0122585	2.43367	0.118755	>0.99999
ENSG00000272540		76.1144	-0.0216086	2.43202	0.118879	>0.99999
ENSG00000054277	OPN3	687.421	-0.0202988	2.43081	0.118971	>0.99999
ENSG00000158427	TMSB15B	51.959	-0.0145449	2.42835	0.119159	>0.99999
ENSG00000182700	IGIP	203.19	0.0149554	2.42823	0.119167	>0.99999
ENSG00000198482	ZNF808	99.2162	0.0115121	2.42727	0.11924	>0.99999
ENSG00000187013	LINC02875	16.551	-0.0255184	2.42597	0.119339	>0.99999
ENSG00000167483	NIBAN3	67.3949	0.0194353	2.42582	0.119351	>0.99999
ENSG00000105662	CRTC1	863.116	-0.0095664	2.42262	0.119595	>0.99999
ENSG00000007376	RPUSD1	1090.32	0.00727001	2.42215	0.119631	>0.99999
ENSG00000138399	FASTKD1	251.124	0.00927643	2.42008	0.119789	>0.99999
ENSG00000105968	H2AZ2	1273.69	-0.0104566	2.41839	0.119918	>0.99999
ENSG00000122557	HERPUD2	704.953	0.00782272	2.41833	0.119923	>0.99999
ENSG00000100926	TM9SF1	2066.52	0.00777791	2.41813	0.119938	>0.99999
ENSG00000126749	EMG1	340.321	0.00682595	2.41808	0.119941	>0.99999
ENSG00000187479	C11orf96	32.4083	-0.0661976	2.41703	0.120022	>0.99999
ENSG00000253910	PCDHGB2	139.437	0.0232491	2.41686	0.120036	>0.99999
ENSG00000146433	TMEM181	1780.72	0.00934334	2.4166	0.120055	>0.99999
ENSG00000263345	SGSM2-AS1	19.7082	0.0179891	2.41651	0.120062	>0.99999
ENSG00000239857	GET4	1457.19	0.00947897	2.41622	0.120084	>0.99999
ENSG00000168679	SLC16A4	286.274	-0.0256528	2.41547	0.120142	>0.99999
ENSG00000271576	PRKACB-DT	18.7331	0.0192052	2.41531	0.120154	>0.99999
ENSG00000261821		23.7257	0.0226638	2.41384	0.120267	>0.99999
ENSG00000161939	RNASEK-C17orf49	194.753	0.0209779	2.41259	0.120363	>0.99999
ENSG00000135540	NHSL1	762.345	-0.0123622	2.41246	0.120373	>0.99999
ENSG00000136280	CCM2	1447.83	-0.00711159	2.40917	0.120627	>0.99999
ENSG00000135439	AGAP2	12.3591	-0.023474	2.40834	0.12069	>0.99999
ENSG00000136866	ZFP37	30.3377	-0.0182099	2.40827	0.120696	>0.99999
ENSG00000238227	TMEM250	2029.45	0.00583881	2.40819	0.120702	>0.99999
ENSG00000141040	ZNF287	113.513	-0.00913698	2.40748	0.120757	>0.99999
ENSG00000260641	TSPAN5-DT	44.2353	0.0227326	2.40706	0.120789	>0.99999
ENSG00000269929	MIRLET7A1HG	30.6481	0.0208791	2.40548	0.120911	>0.99999
ENSG00000184743	ATL3	2158.86	0.00874004	2.40544	0.120914	>0.99999
ENSG00000115446	UNC50	600.72	0.00915215	2.40518	0.120934	>0.99999
ENSG00000139239	RPL14P1	21.4839	0.025903	2.4031	0.121095	>0.99999
ENSG00000049540	ELN	55.4709	-0.085788	2.40102	0.121256	>0.99999
ENSG00000273270		297.277	-0.0119539	2.40042	0.121302	>0.99999
ENSG00000005075	POLR2J	1012.98	-0.00859561	2.399	0.121413	>0.99999
ENSG00000138459	SLC35A5	575.893	0.00829795	2.39891	0.12142	>0.99999
ENSG00000119408	NEK6	2090.64	-0.00970123	2.39789	0.121499	>0.99999
ENSG00000166482	MFAP4	1437.06	-0.0452397	2.39783	0.121504	>0.99999
ENSG00000248429	GASK1B-AS1	156.055	-0.027236	2.39764	0.121518	>0.99999
ENSG00000278903		14.3865	-0.031913	2.39756	0.121525	>0.99999
ENSG00000164403	SHROOM1	287.33	0.012553	2.39609	0.121639	>0.99999
ENSG00000167962	ZNF598	1595.43	0.0075017	2.39576	0.121665	>0.99999
ENSG00000267469		14.9175	-0.0298729	2.39575	0.121666	>0.99999
ENSG00000158483	FAM86C1P	227.091	-0.0124413	2.39509	0.121716	>0.99999
ENSG00000137124	ALDH1B1	2378.71	-0.0218914	2.39195	0.121961	>0.99999
ENSG00000271425	NBPF10	2145.72	0.0158566	2.39188	0.121967	>0.99999
ENSG00000263956	NBPF11	381.198	0.00987684	2.39034	0.122087	>0.99999
ENSG00000156521	TYSND1	243.009	0.0134339	2.38971	0.122136	>0.99999
ENSG00000260063		17.3929	-0.0191821	2.38967	0.12214	>0.99999
ENSG00000258430		19.5224	-0.0193665	2.38924	0.122173	>0.99999
ENSG00000170345	FOS	512.077	-0.0584177	2.38896	0.122195	>0.99999
ENSG00000186318	BACE1	3505.48	-0.00889525	2.38893	0.122197	>0.99999
ENSG00000105254	TBCB	1729.51	-0.00915008	2.38846	0.122234	>0.99999
ENSG00000135549	PKIB	106.387	-0.0359499	2.38768	0.122295	>0.99999
ENSG00000128039	SRD5A3	441.149	-0.011386	2.38736	0.12232	>0.99999
ENSG00000243279	PRAF2	2799.64	-0.00997729	2.38607	0.122421	>0.99999
ENSG00000235169	SMIM1	45.3976	-0.0220957	2.38449	0.122545	>0.99999
ENSG00000273820	USP27X	115.853	0.00959462	2.38378	0.122601	>0.99999
ENSG00000123572	NRK	155.483	0.051534	2.3837	0.122607	>0.99999
ENSG00000164169	PRMT9	168.01	-0.00718638	2.38353	0.12262	>0.99999
ENSG00000143469	SYT14	146.628	0.0331027	2.38261	0.122692	>0.99999
ENSG00000103326	CAPN15	1559.86	0.00947682	2.37971	0.122921	>0.99999
ENSG00000109445	ZNF330	654.612	-0.00690425	2.37709	0.123127	>0.99999
ENSG00000159640	ACE	72.3244	0.0332758	2.37654	0.12317	>0.99999
ENSG00000121005	CRISPLD1	267.576	-0.0229065	2.37496	0.123295	>0.99999
ENSG00000172927	MYEOV	20.8752	0.0346188	2.37421	0.123354	>0.99999
ENSG00000164116	GUCY1A1	14.7476	-0.0519841	2.37376	0.123389	>0.99999
ENSG00000141985	SH3GL1	5090.16	-0.00719142	2.37359	0.123403	>0.99999
ENSG00000198892	SHISA4	1231.79	-0.00865288	2.37303	0.123447	>0.99999
ENSG00000260912		36.5631	-0.0176242	2.37293	0.123455	>0.99999
ENSG00000275052	PPP4R3B	1138.62	0.00749154	2.37235	0.123501	>0.99999
ENSG00000205500	MAPRE3-AS1	19.1916	0.01875	2.37172	0.123551	>0.99999
ENSG00000197124	ZNF682	37.0208	0.0231886	2.37139	0.123577	>0.99999
ENSG00000204922	UQCC3	245.984	-0.0100131	2.37082	0.123622	>0.99999
ENSG00000164953	TMEM67	137.929	0.0112576	2.37055	0.123643	>0.99999
ENSG00000156599	ZDHHC5	3949.91	0.00622105	2.36759	0.123878	>0.99999
ENSG00000228274		26.576	-0.0164243	2.36706	0.12392	>0.99999
ENSG00000260552	COSMOC	22.6998	-0.0205109	2.36578	0.124022	>0.99999
ENSG00000110172	CHORDC1	770.338	0.00751021	2.36538	0.124054	>0.99999
ENSG00000150672	DLG2	11.2712	-0.0235328	2.36476	0.124103	>0.99999
ENSG00000279672		51.1857	0.0303841	2.36462	0.124114	>0.99999
ENSG00000188315	C3orf62	166.713	0.013114	2.36418	0.124149	>0.99999
ENSG00000125122	LRRC29	60.1179	-0.0145963	2.36362	0.124194	>0.99999
ENSG00000090266	NDUFB2	978.071	-0.00818581	2.36259	0.124276	>0.99999
ENSG00000160803	UBQLN4	1293.96	0.00544354	2.36137	0.124373	>0.99999
ENSG00000101361	NOP56	2317.51	0.0103597	2.36029	0.124459	>0.99999
ENSG00000188573	FBLL1	36.0304	-0.0404679	2.35866	0.124589	>0.99999
ENSG00000113319	RASGRF2	683.435	0.0258931	2.35802	0.124641	>0.99999
ENSG00000267740		48.7634	0.0186603	2.35773	0.124664	>0.99999
ENSG00000103148	NPRL3	1385.58	-0.00808243	2.35634	0.124775	>0.99999
ENSG00000137942	FNBP1L	606.241	-0.0103713	2.35584	0.124814	>0.99999
ENSG00000270533		11.7001	0.0213756	2.3557	0.124826	>0.99999
ENSG00000184012	TMPRSS2	11.0367	-0.0629474	2.35562	0.124832	>0.99999
ENSG00000106638	TBL2	1358.79	0.00634266	2.35353	0.124999	>0.99999
ENSG00000157601	MX1	978.495	-0.0506656	2.35183	0.125136	>0.99999
ENSG00000108556	CHRNE	16.3716	0.0259057	2.35038	0.125253	>0.99999
ENSG00000167552	TUBA1A	12856.1	-0.0229602	2.34981	0.125298	>0.99999
ENSG00000104205	SGK3	155.828	0.0114076	2.34964	0.125312	>0.99999
ENSG00000115266	APC2	57.4761	-0.0253793	2.34836	0.125415	>0.99999
ENSG00000103126	AXIN1	931.307	0.00891963	2.34811	0.125435	>0.99999
ENSG00000149809	TM7SF2	555.373	-0.0180431	2.34728	0.125502	>0.99999
ENSG00000261286	ATP2C2-AS1	33.8941	0.0314643	2.34578	0.125623	>0.99999
ENSG00000160072	ATAD3B	1099.67	0.0123206	2.34515	0.125673	>0.99999
ENSG00000106460	TMEM106B	1164.51	-0.0127804	2.34366	0.125794	>0.99999
ENSG00000178685	PARP10	326.355	-0.0233592	2.33824	0.126232	>0.99999
ENSG00000176407	KCMF1	1580.1	0.00658609	2.33703	0.12633	>0.99999
ENSG00000183317	EPHA10	18.5446	0.0161821	2.33659	0.126366	>0.99999
ENSG00000147162	OGT	3442.82	0.0087908	2.33659	0.126366	>0.99999
ENSG00000168175	MAPK1IP1L	2368.19	-0.0068291	2.33476	0.126515	>0.99999
ENSG00000112149	CD83	35.8365	-0.0273464	2.33447	0.126538	>0.99999
ENSG00000242516	LINC00960	60.6114	0.0610853	2.33418	0.126562	>0.99999
ENSG00000161981	SNRNP25	358.865	-0.0127704	2.33334	0.12663	>0.99999
ENSG00000164576	SAP30L	623.152	0.0127135	2.32985	0.126914	>0.99999
ENSG00000109606	DHX15	2209.28	0.00632896	2.32971	0.126926	>0.99999
ENSG00000178033	CALHM5	600.468	-0.0124549	2.32885	0.126996	>0.99999
ENSG00000049449	RCN1	19019.5	0.00891535	2.32829	0.127042	>0.99999
ENSG00000130653	PNPLA7	174.037	0.020597	2.32816	0.127052	>0.99999
ENSG00000231160	KLF3-AS1	24.9121	-0.0168609	2.32595	0.127233	>0.99999
ENSG00000245958	SEPTIN7P14	89.3942	-0.0142565	2.32513	0.1273	>0.99999
ENSG00000214970		10.3592	0.0397625	2.32497	0.127312	>0.99999
ENSG00000167283	ATP5MG	2606.87	-0.00787108	2.32485	0.127322	>0.99999
ENSG00000114353	GNAI2	15494.1	-0.00950386	2.32482	0.127325	>0.99999
ENSG00000259627		20.1925	-0.0308382	2.32415	0.12738	>0.99999
ENSG00000186300	ZNF555	122.368	0.0117685	2.3235	0.127433	>0.99999
ENSG00000178952	TUFM	4331.24	0.00576182	2.32235	0.127527	>0.99999
ENSG00000126247	CAPNS1	11872.4	-0.00942307	2.32151	0.127596	>0.99999
ENSG00000198814	GK	250.253	0.024484	2.32097	0.12764	>0.99999
ENSG00000115107	STEAP3	1784.49	0.0253651	2.32036	0.12769	>0.99999
ENSG00000250903	GMDS-DT	37.9288	-0.0130071	2.31939	0.12777	>0.99999
ENSG00000185278	ZBTB37	181.287	0.0100286	2.31751	0.127925	>0.99999
ENSG00000162636	FAM102B	151.98	-0.0147367	2.31509	0.128123	>0.99999
ENSG00000185608	MRPL40	598.561	-0.00877702	2.31393	0.128219	>0.99999
ENSG00000008516	MMP25	10.3478	0.0385405	2.31388	0.128224	>0.99999
ENSG00000274528		11.726	-0.0289485	2.31265	0.128325	>0.99999
ENSG00000116668	SWT1	80.6161	0.0139798	2.31214	0.128367	>0.99999
ENSG00000183323	CCDC125	117.771	-0.0128769	2.31186	0.128391	>0.99999
ENSG00000226268		17.344	0.0577649	2.31111	0.128452	>0.99999
ENSG00000275400		32.7309	-0.0166344	2.31081	0.128477	>0.99999
ENSG00000215199	YWHAZP6	32.8212	-0.0164734	2.30946	0.128588	>0.99999
ENSG00000114999	TTL	1619.76	0.00819207	2.30787	0.12872	>0.99999
ENSG00000257093	DENND11	250.443	0.0102336	2.30755	0.128747	>0.99999
ENSG00000138029	HADHB	2031.52	-0.00459825	2.30741	0.128758	>0.99999
ENSG00000060140	STYK1	10.5427	0.045801	2.30654	0.128831	>0.99999
ENSG00000187109	NAP1L1	9042.07	0.0074667	2.30525	0.128938	>0.99999
ENSG00000250186		20.3078	-0.017792	2.30431	0.129016	>0.99999
ENSG00000123131	PRDX4	3487.8	0.00993905	2.30313	0.129114	>0.99999
ENSG00000120738	EGR1	2577.57	-0.0506767	2.30294	0.129129	>0.99999
ENSG00000160014	CALM3	7330.69	-0.0147527	2.30274	0.129146	>0.99999
ENSG00000214944	ARHGEF28	1471.18	0.0188519	2.30245	0.12917	>0.99999
ENSG00000196756	SNHG17	339.489	0.0169723	2.30195	0.129212	>0.99999
ENSG00000259198		249.862	-0.0170417	2.30146	0.129253	>0.99999
ENSG00000178199	ZC3H12D	13.0172	0.0207046	2.30141	0.129257	>0.99999
ENSG00000183496	MEX3B	713.258	-0.0227565	2.30076	0.129311	>0.99999
ENSG00000107796	ACTA2	45527.1	-0.0230382	2.30054	0.129329	>0.99999
ENSG00000198393	ZNF26	280.933	0.00759089	2.29988	0.129384	>0.99999
ENSG00000114859	CLCN2	205.279	0.0110782	2.29985	0.129387	>0.99999
ENSG00000149679	CABLES2	358.972	0.0114931	2.29844	0.129504	>0.99999
ENSG00000034510	TMSB10	40922.3	-0.0122057	2.2982	0.129524	>0.99999
ENSG00000133835	HSD17B4	1838.64	0.00653183	2.29742	0.129589	>0.99999
ENSG00000164346	NSA2	1911.2	-0.0106883	2.29612	0.129697	>0.99999
ENSG00000141449	GREB1L	108.646	0.025677	2.29612	0.129698	>0.99999
ENSG00000106483	SFRP4	256.452	0.0774493	2.29494	0.129797	>0.99999
ENSG00000151876	FBXO4	86.0789	0.0125027	2.29453	0.129831	>0.99999
ENSG00000143257	NR1I3	18.0647	0.0195812	2.29362	0.129906	>0.99999
ENSG00000166333	ILK	5569.93	-0.00834547	2.29225	0.130021	>0.99999
ENSG00000155657	TTN	10.9185	0.0619768	2.29035	0.130181	>0.99999
ENSG00000162437	RAVER2	236.862	-0.0135982	2.2901	0.130202	>0.99999
ENSG00000181007	ZFP82	85.7783	0.0130065	2.29002	0.130208	>0.99999
ENSG00000138771	SHROOM3	636.182	-0.0217594	2.29001	0.130209	>0.99999
ENSG00000110025	SNX15	447.694	-0.00797167	2.28946	0.130255	>0.99999
ENSG00000003056	M6PR	3841.9	0.00864126	2.2876	0.130411	>0.99999
ENSG00000175354	PTPN2	487.96	0.00916711	2.28748	0.130421	>0.99999
ENSG00000075426	FOSL2	3328.66	-0.0106803	2.2873	0.130437	>0.99999
ENSG00000111331	OAS3	368.756	-0.0422551	2.28511	0.130621	>0.99999
ENSG00000188013	MEIS3P2	49.8378	0.0239627	2.28367	0.130742	>0.99999
ENSG00000105792	CFAP69	32.3	0.0222562	2.28344	0.130761	>0.99999
ENSG00000164535	DAGLB	790.297	0.0116473	2.28263	0.13083	>0.99999
ENSG00000247626	MARS2	154.502	0.0095247	2.28204	0.13088	>0.99999
ENSG00000259522		61.3292	0.0289148	2.28056	0.131005	>0.99999
ENSG00000108395	TRIM37	1178.44	0.0100883	2.28047	0.131012	>0.99999
ENSG00000164251	F2RL1	193.513	0.0354085	2.28029	0.131027	>0.99999
ENSG00000167280	ENGASE	457.089	0.00882794	2.27946	0.131097	>0.99999
ENSG00000130294	KIF1A	10.3729	0.0662857	2.27889	0.131145	>0.99999
ENSG00000270170	NCBP2AS2	235.643	0.00753817	2.27806	0.131216	>0.99999
[truncated: 13,980 more rows]

## Sheet: Table S4
Table S4. Association of gene expression with FM% at 4-6 months of age. Adjusted for child's age at visit.
Ensembl Gene ID	Gene Symbol	Mean of Normalized Counts	Magnitude	Wald Statistic	p-value	FDR*	*adjusted p values for the genes which do not pass the idenpendece filter threshold are set to NA (for more information, please read- https://bioconductor.org/packages/release/bioc/vignettes/DESeq2/inst/doc/DESeq2.html#indfilt)
ENSG00000097021	ACOT7	1981.18	-0.0314341	33.5512	6.94e-09	0.000100157
ENSG00000148926	ADM	1452.25	-0.0620346	30.169	3.96e-08	0.000169467
ENSG00000166920	C15orf48	159.548	-0.0930532	29.6873	5.08e-08	0.000169467
ENSG00000138356	AOX1	194.302	-0.0669774	29.4462	5.75e-08	0.000169467
ENSG00000178343	SHISA3	59.6591	-0.136766	29.405	5.87e-08	0.000169467
ENSG00000128564	VGF	34.9504	-0.0844999	27.9571	1.24e-07	0.000298286
ENSG00000233452	STXBP5-AS1	32.3705	-0.0746196	27.5973	1.49e-07	0.000307937
ENSG00000221852	KRTAP1-5	86.4926	-0.121136	26.8539	2.19e-07	0.000395775
ENSG00000136999	CCN3	104.135	-0.0707787	26.0877	3.26e-07	0.000523071
ENSG00000008311	AASS	661.192	0.0322558	25.4217	4.61e-07	0.00066476
ENSG00000079215	SLC1A3	413.095	0.0834554	23.7495	1.1e-06	0.00141538
ENSG00000170892	TSEN34	1205.13	-0.01165	23.6143	1.18e-06	0.00141538
ENSG00000122861	PLAU	804.367	-0.0819872	23.1505	1.5e-06	0.00166268
ENSG00000104368	PLAT	9073.48	-0.10471	22.472	2.13e-06	0.00219761
ENSG00000177363	LRRN4CL	121.751	-0.0597998	21.2909	3.95e-06	0.00371535
ENSG00000188869	TMC3	42.1389	0.174075	21.2024	4.13e-06	0.00371535
ENSG00000137825	ITPKA	31.0428	-0.070532	21.0921	4.38e-06	0.00371535
ENSG00000277586	NEFL	314.108	-0.13493	20.9224	4.78e-06	0.00383385
ENSG00000266402	SNHG25	13.3709	-0.0494079	20.7321	5.28e-06	NA
ENSG00000066629	EML1	209.903	-0.050563	20.5133	5.92e-06	0.00449727
ENSG00000168843	FSTL5	10.095	-0.131236	20.2522	6.79e-06	NA
ENSG00000126088	UROD	1941.54	-0.0123124	19.4238	1.05e-05	0.00720026
ENSG00000278771	RN7SL3	22.6194	-0.0867455	19.422	1.05e-05	0.00720026
ENSG00000163814	CDCP1	1148.07	-0.0933499	19.319	1.11e-05	0.00725399
ENSG00000102144	PGK1	7085.47	-0.0165703	19.1324	1.22e-05	0.00765097
ENSG00000175550	DRAP1	4877.26	-0.0225552	18.9795	1.32e-05	0.00794378
ENSG00000198740	ZNF652	397.673	0.0162137	18.8952	1.38e-05	0.00797052
ENSG00000149925	ALDOA	45408.3	-0.0180706	18.7623	1.48e-05	0.00803446
ENSG00000168811	IL12A	57.0595	-0.0641178	18.7332	1.5e-05	0.00803446
ENSG00000243725	TTC4	479.157	-0.0139172	18.3082	1.88e-05	0.00944128
ENSG00000182141	ZNF708	82.6713	0.021648	18.2639	1.92e-05	0.00944128
ENSG00000114353	GNAI2	15633.5	-0.0144216	18.2249	1.96e-05	0.00944128
ENSG00000134897	BIVM	645.555	0.0147271	17.9747	2.24e-05	0.0104198
ENSG00000105220	GPI	6117.71	-0.0173325	17.8833	2.35e-05	0.0105905
ENSG00000213585	VDAC1	5213.43	-0.00989336	17.8106	2.44e-05	0.0106695
ENSG00000170043	TRAPPC1	3218.05	-0.0145739	17.689	2.6e-05	0.0107496
ENSG00000173210	ABLIM3	851.246	-0.0400734	17.6391	2.67e-05	0.0107496
ENSG00000138411	HECW2	190.412	-0.0435591	17.6309	2.68e-05	0.0107496
ENSG00000132185	FCRLA	15.9857	-0.0801271	17.5459	2.8e-05	NA
ENSG00000176171	BNIP3	1279.28	-0.0222307	17.4421	2.96e-05	0.0109276
ENSG00000143549	TPM3	9070.2	-0.0143358	17.3613	3.09e-05	0.0109276
ENSG00000165891	E2F7	203.126	-0.0502993	17.3597	3.09e-05	0.0109276
ENSG00000123496	IL13RA2	25.7524	-0.0879954	17.3545	3.1e-05	0.0109276
ENSG00000187605	TET3	497.762	0.0223238	17.3263	3.15e-05	0.0109276
ENSG00000111652	COPS7A	1868.02	-0.0101767	17.2693	3.24e-05	0.0109276
ENSG00000143344	RGL1	715.353	0.0230365	17.2619	3.26e-05	0.0109276
ENSG00000108551	RASD1	28.3946	-0.0873996	17.1246	3.5e-05	0.0114796
ENSG00000185219	ZNF445	627.938	0.0149558	16.9831	3.77e-05	0.0120926
ENSG00000166689	PLEKHA7	237.442	0.0669791	16.8952	3.95e-05	0.0123906
ENSG00000110583	NAA40	647.997	0.013025	16.7199	4.33e-05	0.013097
ENSG00000105649	RAB3A	170.66	-0.0324819	16.7092	4.36e-05	0.013097
ENSG00000175352	NRIP3	343.248	-0.0184636	16.5731	4.68e-05	0.0137776
ENSG00000119772	DNMT3A	736.612	0.0149032	16.4992	4.87e-05	0.0137776
ENSG00000111669	TPI1	9948.6	-0.0186308	16.4938	4.88e-05	0.0137776
ENSG00000270607	NAV2-AS6	91.3774	-0.0521873	16.4613	4.97e-05	0.0137776
ENSG00000167528	ZNF641	674.371	0.033459	16.3878	5.16e-05	0.0140521
ENSG00000135605	TEC	11.4415	-0.0533492	16.3439	5.28e-05	NA
ENSG00000152953	STK32B	133.45	-0.0419384	16.2377	5.59e-05	0.0144608
ENSG00000115649	CNPPD1	1045.55	-0.0213829	16.2372	5.59e-05	0.0144608
ENSG00000260001	TGFBR3L	79.722	-0.0335582	16.1811	5.76e-05	0.0144608
ENSG00000198690	FAN1	502.456	0.0114203	16.1807	5.76e-05	0.0144608
ENSG00000143774	GUK1	4382.25	-0.0136665	16.1426	5.87e-05	0.0144608
ENSG00000257219	LNCOG	68.4069	-0.0626722	16.1266	5.92e-05	0.0144608
ENSG00000143786	CNIH3	196.554	-0.0693564	16.0985	6.01e-05	0.0144608
ENSG00000103266	STUB1	2996.75	-0.0125936	15.9538	6.49e-05	0.0153529
ENSG00000137504	CREBZF	744.479	0.0148352	15.8864	6.73e-05	0.0156536
ENSG00000141349	G6PC3	2290.62	-0.0186557	15.8177	6.97e-05	0.015922
ENSG00000174903	RAB1B	6442.98	-0.0106495	15.7941	7.06e-05	0.015922
ENSG00000108932	SLC16A6	11.0053	-0.080933	15.7448	7.25e-05	NA
ENSG00000163520	FBLN2	11237	0.0487168	15.7308	7.3e-05	0.0162105
ENSG00000123892	RAB38	16.0659	-0.0507753	15.7164	7.36e-05	NA
ENSG00000235162	C12orf75	2258.4	-0.0350181	15.6652	7.56e-05	0.0165285
ENSG00000106034	CPED1	515.384	-0.0506736	15.5695	7.95e-05	0.0170185
ENSG00000111674	ENO2	1141.93	-0.0266654	15.5535	8.02e-05	0.0170185
ENSG00000153253	SCN3A	13.7428	-0.134102	15.4995	8.25e-05	NA
ENSG00000011258	MBTD1	194.413	0.0177883	15.3891	8.75e-05	0.0182957
ENSG00000067225	PKM	90107.7	-0.0142429	15.3135	9.11e-05	0.0186779
ENSG00000269968		435.737	-0.0387142	15.2897	9.22e-05	0.0186779
ENSG00000131408	NR1H2	1872.11	-0.007562	15.2409	9.46e-05	0.0186779
ENSG00000123146	ADGRE5	1587.56	-0.0359221	15.2239	9.55e-05	0.0186779
ENSG00000146374	RSPO3	37.4768	-0.0812125	15.1892	9.73e-05	0.0186779
ENSG00000177700	POLR2L	4600.58	-0.0140525	15.1852	9.75e-05	0.0186779
ENSG00000026508	CD44	15727.9	-0.0375806	15.1471	9.95e-05	0.0186779
ENSG00000163083	INHBB	38.2156	-0.108839	15.1019	0.000101863	0.0186779
ENSG00000100201	DDX17	7908.04	0.00983593	15.0551	0.000104416	0.0186779
ENSG00000114480	GBE1	1869.41	-0.0260333	15.0484	0.000104792	0.0186779
ENSG00000128805	ARHGAP22	977.462	-0.0322086	15.0353	0.000105517	0.0186779
ENSG00000136830	NIBAN2	13340.2	-0.0158978	15.0096	0.000106964	0.0186779
ENSG00000168917	SLC35G2	132.612	-0.0338443	14.9995	0.000107537	0.0186779
ENSG00000111667	USP5	3067.41	-0.00975024	14.9966	0.000107705	0.0186779
ENSG00000204267	TAP2	949.758	-0.0223867	14.9554	0.000110083	0.0186779
ENSG00000185437	SH3BGR	55.1427	-0.0329336	14.9484	0.000110493	0.0186779
ENSG00000167815	PRDX2	4300.31	-0.0117048	14.9056	0.000113025	0.0186779
ENSG00000168795	ZBTB5	295.701	0.017811	14.8911	0.000113901	0.0186779
ENSG00000067992	PDK3	48.4564	-0.0286841	14.8909	0.000113913	0.0186779
ENSG00000105339	DENND3	374.53	-0.0303106	14.8568	0.000115992	0.018805
ENSG00000143919	CAMKMT	154.12	-0.0212416	14.8011	0.000119467	0.0191532
ENSG00000119632	IFI27L2	1201.56	-0.0148289	14.6436	0.000129873	0.0205927
ENSG00000039139	DNAH5	40.313	-0.0436165	14.5817	0.000134211	0.0207943
ENSG00000278291		64.4504	-0.0307275	14.5719	0.000134914	0.0207943
ENSG00000111640	GAPDH	116252	-0.016334	14.5543	0.000136174	0.0207943
ENSG00000151612	ZNF827	871.639	0.0187854	14.5442	0.000136909	0.0207943
ENSG00000258017		407.18	-0.0381073	14.5143	0.000139102	0.0209073
ENSG00000103064	SLC7A6	1789.43	0.0159338	14.4477	0.000144104	0.0213346
ENSG00000105568	PPP2R1A	6336.46	-0.00798173	14.4299	0.000145471	0.0213346
ENSG00000249992	TMEM158	1342.76	-0.0534099	14.4058	0.000147345	0.0213346
ENSG00000116731	PRDM2	909.286	0.0146865	14.3993	0.000147859	0.0213346
ENSG00000128298	BAIAP2L2	27.6497	-0.0551431	14.3453	0.000152155	0.0217371
ENSG00000157045	NTAN1	848.051	-0.0152637	14.3229	0.000153978	0.0217818
ENSG00000137842	TMEM62	210.951	-0.0226798	14.292	0.00015653	0.0219278
ENSG00000270189		76.0128	0.0255052	14.2289	0.000161868	0.0224577
ENSG00000074527	NTN4	617.134	-0.0711129	14.1957	0.000164742	0.0226387
ENSG00000099977	DDT	1216.47	-0.0147791	14.0565	0.000177402	0.0241485
ENSG00000279337		97.389	-0.0425531	13.8835	0.000194497	0.0257222
ENSG00000172456	FGGY	135.417	-0.0188969	13.85	0.000198	0.0257222
ENSG00000112576	CCND3	918.787	-0.0223893	13.8418	0.00019886	0.0257222
ENSG00000130985	UBA1	10921.9	-0.00899973	13.8385	0.000199217	0.0257222
ENSG00000129474	AJUBA	1902.5	0.017762	13.8146	0.000201758	0.0257222
ENSG00000275023	MLLT6	1508.53	0.0113292	13.8139	0.000201843	0.0257222
ENSG00000105254	TBCB	1740.03	-0.0129698	13.7976	0.000203599	0.0257222
ENSG00000101421	CHMP4B	3301.95	-0.00622876	13.7957	0.000203798	0.0257222
ENSG00000171314	PGAM1	9162.45	-0.00953913	13.7818	0.000205321	0.0257222
ENSG00000134333	LDHA	14424.4	-0.023031	13.7609	0.000207612	0.0257222
ENSG00000163257	DCAF16	592.493	0.0119519	13.7522	0.000208573	0.0257222
ENSG00000181649	PHLDA2	3211.96	-0.0236378	13.7078	0.000213563	0.0261144
ENSG00000170456	DENND5B	594.201	0.0326375	13.6317	0.000222396	0.0268789
ENSG00000075213	SEMA3A	378.642	-0.0468432	13.6221	0.000223541	0.0268789
ENSG00000104756	KCTD9	797.449	-0.0127461	13.6051	0.000225577	0.0268996
ENSG00000049245	VAMP3	2885.7	-0.00955855	13.5698	0.000229857	0.0271853
ENSG00000160213	CSTB	4822.22	-0.0182478	13.5351	0.000234148	0.0274407
ENSG00000129559	NEDD8	3060.43	-0.00840427	13.5217	0.00023582	0.0274407
ENSG00000144959	NCEH1	947.196	-0.0270783	13.4797	0.000241156	0.027594
ENSG00000087589	CASS4	29.1732	-0.0502207	13.4736	0.000241944	0.027594
ENSG00000158042	MRPL17	1406.57	-0.0115072	13.4566	0.000244144	0.027594
ENSG00000140577	CRTC3	939.227	0.0109189	13.4517	0.000244787	0.027594
ENSG00000162415	ZSWIM5	11.7708	-0.0645898	13.4516	0.000244802	NA
ENSG00000240498	CDKN2B-AS1	20.6064	0.0327354	13.4305	0.00024756	0.0276099
ENSG00000126458	RRAS	2864.8	-0.0160664	13.4215	0.000248755	0.0276099
ENSG00000170310	STX8	452.456	-0.0109836	13.3218	0.000262342	0.0288956
ENSG00000100075	SLC25A1	3341.7	-0.014459	13.2885	0.000267041	0.0290906
ENSG00000145358	DDIT4L	216.474	-0.0454898	13.2808	0.000268144	0.0290906
ENSG00000087074	PPP1R15A	5035.71	-0.0257813	13.2463	0.000273119	0.0293146
ENSG00000196935	SRGAP1	998.558	-0.0169005	13.227	0.000275947	0.0293146
ENSG00000267607	ICAM4-AS1	25.3295	-0.0534766	13.2233	0.000276488	0.0293146
ENSG00000104221	BRF2	456.244	-0.0121512	13.2108	0.000278335	0.0293146
ENSG00000152804	HHEX	168.929	-0.066653	13.1811	0.000282794	0.0295684
ENSG00000105889	STEAP1B	20.8238	-0.0667594	13.1618	0.00028571	0.0296583
ENSG00000243742	RPLP0P2	176.555	-0.0497823	12.9971	0.00031198	0.032154
ENSG00000146143	PRIM2	256.291	-0.0180041	12.9815	0.000314586	0.0321926
ENSG00000179431	FJX1	895.818	-0.0199366	12.9435	0.000321034	0.0326212
ENSG00000163491	NEK10	45.7142	-0.0611004	12.898	0.00032893	0.0331897
ENSG00000212694	LINC01089	198.545	0.0239809	12.8704	0.000333814	0.0334486
ENSG00000197442	MAP3K5	242.664	-0.0307727	12.8156	0.000343735	0.0341774
ENSG00000172757	CFL1	32563.6	-0.0124475	12.8043	0.000345825	0.0341774
ENSG00000143442	POGZ	1456.45	0.00957753	12.7526	0.000355522	0.0348968
ENSG00000149269	PAK1	731.263	-0.011455	12.721	0.000361571	0.0352179
ENSG00000131051	RBM39	3717.8	0.00907271	12.6917	0.000367283	0.0352179
ENSG00000134590	RTL8C	6747.88	-0.0140671	12.6749	0.000370603	0.0352179
ENSG00000156515	HK1	7121.55	-0.0147761	12.6429	0.000376985	0.0352179
ENSG00000100401	RANGAP1	3080.75	-0.017394	12.6366	0.000378276	0.0352179
ENSG00000139372	TDG	761.098	0.0153873	12.6366	0.000378277	0.0352179
ENSG00000171130	ATP6V0E2	876.201	-0.0197611	12.6274	0.000380139	0.0352179
ENSG00000165637	VDAC2	3911.62	-0.00897884	12.6255	0.000380517	0.0352179
ENSG00000068650	ATP11A	2161.6	0.0189352	12.6168	0.000382301	0.0352179
ENSG00000101493	ZNF516	1138.79	0.0116335	12.6003	0.000385691	0.0352179
ENSG00000234546	LNCTAM34A	82.1797	0.0194769	12.5838	0.000389107	0.0352179
ENSG00000104722	NEFM	893.524	-0.0754534	12.5802	0.000389858	0.0352179
ENSG00000014216	CAPN1	7285.11	-0.0119911	12.577	0.000390523	0.0352179
ENSG00000173480	ZNF417	123.583	0.023838	12.5532	0.000395527	0.0354475
ENSG00000130640	TUBGCP2	2298.5	-0.00865687	12.5247	0.000401599	0.0357333
ENSG00000107643	MAPK8	605.773	0.0117113	12.5143	0.000403847	0.0357333
ENSG00000152684	PELO	1250.35	-0.01124	12.5037	0.000406144	0.0357333
ENSG00000005448	WDR54	235.158	-0.0200262	12.4771	0.000411969	0.036026
ENSG00000143382	ADAMTSL4	325.275	-0.0482755	12.4396	0.000420328	0.0362836
ENSG00000198513	ATL1	267.645	-0.0229869	12.4297	0.000422568	0.0362836
ENSG00000182117	NOP10	1891.61	-0.010976	12.4289	0.000422737	0.0362836
ENSG00000174306	ZHX3	1829.6	0.0110853	12.4191	0.000424972	0.0362836
ENSG00000279400		16.5045	0.0851817	12.4098	0.000427085	NA
ENSG00000213753	CENPBD2P	1014.34	0.00932945	12.3948	0.000430525	0.0363204
ENSG00000132109	TRIM21	399.481	-0.0169344	12.3838	0.000433081	0.0363204
ENSG00000141959	PFKL	3935.5	-0.0120539	12.3812	0.000433668	0.0363204
ENSG00000150459	SAP18	2390.13	-0.00856591	12.3735	0.000435472	0.0363204
ENSG00000100997	ABHD12	1720.91	-0.0184805	12.3458	0.000441985	0.0366079
ENSG00000279407		33.9045	0.034453	12.331	0.000445506	0.0366079
ENSG00000278129	ZNF8	298.437	0.0135106	12.3267	0.00044653	0.0366079
ENSG00000143450	OAZ3	41.0895	-0.0223548	12.3042	0.000451938	0.0367811
ENSG00000089902	RCOR1	822.434	0.0119464	12.2968	0.000453741	0.0367811
ENSG00000074416	MGLL	1962.96	-0.025308	12.2471	0.000465971	0.0372458
ENSG00000198258	UBL5	1775.05	-0.00997616	12.2458	0.000466298	0.0372458
ENSG00000105402	NAPA	3885.72	-0.0114262	12.2321	0.000469747	0.0372458
ENSG00000172458	IL17D	56.0173	-0.0292998	12.2048	0.000476671	0.0372458
ENSG00000136161	RCBTB2	129.58	0.0163188	12.1843	0.000481933	0.0372458
ENSG00000107036	RIC1	1087.96	0.0142599	12.1769	0.000483855	0.0372458
ENSG00000234616	JRK	493.932	0.0124865	12.1732	0.000484809	0.0372458
ENSG00000183751	TBL3	1169.73	-0.0100113	12.169	0.000485897	0.0372458
ENSG00000160746	ANO10	1844.08	-0.0180852	12.1581	0.000488739	0.0372458
ENSG00000150991	UBC	47336.9	-0.0105979	12.1542	0.000489768	0.0372458
ENSG00000185829	ARL17A	288.867	0.0222599	12.1538	0.000489878	0.0372458
ENSG00000241990	PRR34-AS1	61.4079	-0.023231	12.1516	0.00049045	0.0372458
ENSG00000197208	SLC22A4	170.784	-0.0279155	12.1301	0.000496151	0.0374815
ENSG00000155858	LSM11	232.205	0.0172296	12.0943	0.000505771	0.0379079
ENSG00000177105	RHOG	1327.75	-0.0109126	12.0896	0.000507049	0.0379079
ENSG00000099937	SERPIND1	14.438	-0.0981449	12.0693	0.000512597	NA
ENSG00000160570	DEDD2	664.955	-0.0132175	12.0349	0.000522136	0.0387141
ENSG00000011347	SYT7	169.767	-0.0721047	12.0285	0.000523939	0.0387141
ENSG00000060656	PTPRU	1899.27	0.0240164	12.0216	0.000525883	0.0387141
ENSG00000187134	AKR1C1	156.334	-0.0614446	12.0009	0.000531762	0.0388249
ENSG00000178896	EXOSC4	454.511	-0.0113584	11.9853	0.000536231	0.0388249
ENSG00000147586	MRPS28	239.522	-0.0121863	11.9789	0.000538057	0.0388249
ENSG00000107362	ABHD17B	259.294	0.0184265	11.9706	0.000540459	0.0388249
ENSG00000104671	DCTN6	664.066	-0.00841349	11.9693	0.000540841	0.0388249
ENSG00000139651	ZNF740	662.879	0.00993312	11.959	0.000543847	0.0388474
ENSG00000110801	PSMD9	1279.61	-0.0102218	11.9364	0.000550474	0.0389464
ENSG00000011114	BTBD7	908.671	0.0114029	11.9316	0.000551905	0.0389464
ENSG00000136718	IMP4	1395.71	-0.0118293	11.9268	0.000553331	0.0389464
ENSG00000231856		21.677	0.0250006	11.9082	0.000558886	0.0389784
ENSG00000166224	SGPL1	1792.17	0.019518	11.9072	0.000559189	0.0389784
ENSG00000119922	IFIT2	237.316	-0.0449072	11.8969	0.000562285	0.0390058
ENSG00000107438	PDLIM1	1308.68	-0.0338938	11.8752	0.000568855	0.0392595
ENSG00000102265	TIMP1	39247.7	-0.0375882	11.867	0.000571383	0.0392595
ENSG00000113739	STC2	13910.8	-0.0402864	11.856	0.000574751	0.0393037
ENSG00000269335	IKBKG	917.82	-0.0101876	11.8076	0.000589903	0.0400333
ENSG00000136854	STXBP1	1993.85	-0.0174602	11.8042	0.00059097	0.0400333
ENSG00000119699	TGFB3	162.165	0.0338999	11.7882	0.000596067	0.0401899
ENSG00000160094	ZNF362	981.837	0.0182651	11.7772	0.00059962	0.0402415
ENSG00000113312	TTC1	1432.79	-0.00795937	11.76	0.000605186	0.040427
ENSG00000257151		111.277	0.030955	11.726	0.000616338	0.0409822
ENSG00000104365	IKBKB	632.911	-0.0246565	11.7003	0.000624902	0.0412272
ENSG00000187189	TSPYL4	706.69	0.019402	11.6978	0.000625737	0.0412272
ENSG00000179115	FARSA	2185.22	-0.0108226	11.6877	0.000629151	0.0412346
ENSG00000099817	POLR2E	4169.19	-0.0131161	11.6806	0.000631564	0.0412346
ENSG00000271533		60.3503	0.0285387	11.6311	0.000648595	0.0421557
ENSG00000203880	PCMTD2	469.137	0.0155487	11.6128	0.00065501	0.0423818
ENSG00000133398	MED10	666.031	-0.0109443	11.6033	0.000658364	0.0424086
ENSG00000187024	PTRH1	262.247	-0.0183453	11.5803	0.000666534	0.0426573
ENSG00000260549	MT1L	152.842	-0.040255	11.5759	0.000668137	0.0426573
ENSG00000135334	AKIRIN2	1020.44	-0.010091	11.5595	0.000674039	0.0427309
ENSG00000136930	PSMB7	3218.09	-0.0113193	11.5563	0.000675213	0.0427309
ENSG00000121766	ZCCHC17	745.246	-0.00920999	11.5479	0.000678269	0.0427369
ENSG00000125821	DTD1	1074.82	-0.0146985	11.5254	0.00068653	0.0429038
ENSG00000126461	SCAF1	4393.84	-0.00929458	11.5245	0.000686865	0.0429038
ENSG00000007545	CRAMP1	680.93	0.00963892	11.5122	0.000691413	0.0430017
ENSG00000183060	LYSMD4	147.707	0.0174905	11.4979	0.000696756	0.043148
ENSG00000109919	MTCH2	2146.27	-0.00634028	11.4738	0.000705825	0.0435229
ENSG00000197162	ZNF785	282.278	0.0178876	11.4615	0.000710514	0.0436255
ENSG00000204291	COL15A1	61.794	-0.084127	11.4434	0.000717485	0.0436972
ENSG00000124787	RPP40	160.876	-0.0175811	11.4427	0.000717737	0.0436972
ENSG00000163517	HDAC11	426.81	-0.0132251	11.4331	0.000721459	0.0437041
ENSG00000170234	PWWP2A	482.077	0.0106981	11.426	0.000724232	0.0437041
ENSG00000115539	PDCL3	607.782	-0.014173	11.4154	0.000728361	0.0437041
ENSG00000204634	TBC1D8	44.1026	-0.0392251	11.4114	0.000729966	0.0437041
ENSG00000100911	PSME2	1407.49	-0.0164152	11.3913	0.000737905	0.0439968
ENSG00000178386	ZNF223	57.9021	0.0192298	11.3766	0.00074375	0.0441628
ENSG00000131981	LGALS3	1580.75	-0.0255644	11.3576	0.000751393	0.0444338
ENSG00000099957	P2RX6	161.67	-0.0376742	11.3444	0.000756774	0.0444973
ENSG00000134531	EMP1	1518.48	-0.0320377	11.3398	0.000758634	0.0444973
ENSG00000100804	PSMB5	3280.88	-0.00764313	11.3168	0.000768077	0.0447334
ENSG00000100029	PES1	2449.12	-0.0109609	11.3125	0.000769884	0.0447334
ENSG00000106624	AEBP1	6791.42	0.0590622	11.3038	0.000773494	0.0447334
ENSG00000144560	VGLL4	1845.44	0.0157575	11.3	0.00077506	0.0447334
ENSG00000127666	TICAM1	807.295	-0.0140041	11.2903	0.00077913	0.0447891
ENSG00000189320	FAM180A	28.6343	-0.066947	11.2572	0.000793129	0.0454129
ENSG00000272540		77.5511	-0.0322957	11.2352	0.000802618	0.0457746
ENSG00000154734	ADAMTS1	3496.25	-0.0393858	11.2174	0.000810355	0.0460339
ENSG00000256223	ZNF10	134.899	0.0186289	11.2073	0.000814743	0.0461017
ENSG00000107140	TESK1	1453.78	-0.0124258	11.1855	0.000824382	0.046407
ENSG00000091409	ITGA6	801.328	-0.0327936	11.1806	0.000826571	0.046407
ENSG00000283196		1056.67	-0.0200722	11.1629	0.000834488	0.0466699
ENSG00000171421	MRPL36	524.825	-0.0112619	11.1368	0.000846335	0.0471497
ENSG00000084754	HADHA	4323.88	-0.00864835	11.1233	0.000852519	0.0473115
ENSG00000134308	YWHAQ	6350.77	-0.0131961	11.1095	0.000858879	0.0473714
ENSG00000127585	FBXL16	100.758	-0.0528712	11.106	0.000860481	0.0473714
ENSG00000141522	ARHGDIA	15455.4	-0.0114615	11.0996	0.000863448	0.0473714
ENSG00000237037	NDUFA6-DT	68.4412	0.0196443	11.0796	0.000872831	0.047699
ENSG00000111237	VPS29	938.727	-0.00967763	11.0728	0.000876029	0.047699
ENSG00000254452		24.1923	-0.0360004	11.0506	0.000886607	0.0480934
ENSG00000189056	RELN	206.893	-0.0800259	11.0413	0.00089106	0.0481539
ENSG00000047849	MAP4	17133.9	-0.0117223	11.0316	0.000895705	0.0482244
ENSG00000068745	IP6K2	1434.03	0.013178	11.0229	0.00089995	0.0482728
ENSG00000157933	SKI	3848.61	0.0127165	11.0053	0.000908495	0.0485506
ENSG00000129932	DOHH	570.294	-0.0112675	10.9931	0.000914521	0.0485987
ENSG00000051620	HEBP2	1255.89	-0.0181627	10.9847	0.000918666	0.0485987
ENSG00000140319	SRP14	5882.55	-0.00837256	10.9829	0.000919571	0.0485987
ENSG00000196653	ZNF502	89.9493	0.018335	10.9761	0.000922931	0.0485987
ENSG00000221914	PPP2R2A	1268.34	-0.00780458	10.9695	0.000926234	0.0485987
ENSG00000271576	PRKACB-DT	18.1208	0.0330837	10.9638	0.000929071	NA
ENSG00000128394	APOBEC3F	137.81	-0.0195149	10.953	0.000934503	0.0488549
ENSG00000145777	TSLP	54.0976	-0.0515085	10.9416	0.00094029	0.0489593
ENSG00000236088	COX10-DT	81.0008	0.0145554	10.9328	0.000944743	0.0489593
ENSG00000165671	NSD1	1866.88	0.0100119	10.9261	0.000948164	0.0489593
ENSG00000185883	ATP6V0C	9912.88	-0.0165446	10.9104	0.000956241	0.0489593
ENSG00000177380	PPFIA3	123.179	0.0358289	10.906	0.000958528	0.0489593
ENSG00000271430		346.134	0.0214209	10.9002	0.000961547	0.0489593
ENSG00000100138	SNU13	2062.19	-0.0104266	10.8956	0.000963909	0.0489593
ENSG00000198466	ZNF587	765.258	0.0161136	10.8903	0.000966701	0.0489593
ENSG00000148082	SHC3	2244.9	0.027201	10.8896	0.000967038	0.0489593
ENSG00000147065	MSN	21631.6	-0.00988277	10.8776	0.000973353	0.0491067
ENSG00000104728	ARHGEF10	1656.1	0.00909667	10.8395	0.000993577	0.049735
ENSG00000213337	ANKRD39	224.588	-0.0142647	10.8379	0.000994413	0.049735
ENSG00000134602	STK26	364.039	0.0237969	10.8347	0.000996148	0.049735
ENSG00000196116	TDRD7	348.316	-0.0137041	10.8253	0.00100122	0.0497468
ENSG00000259721	GREM1-AS1	68.2821	-0.0450748	10.8153	0.00100666	0.0497468
ENSG00000163347	CLDN1	870.727	-0.0654933	10.8152	0.00100673	0.0497468
ENSG00000144837	PLA1A	9.68829	-0.0868905	10.8099	0.00100959	NA
ENSG00000049618	ARID1B	1797.89	0.0121538	10.8023	0.00101376	0.0498857
ENSG00000162729	IGSF8	1238.98	-0.0169851	10.7974	0.00101645	0.0498857
ENSG00000185955	SPACDR	11.422	-0.0534743	10.7935	0.00101858	NA
ENSG00000099341	PSMD8	5698.41	-0.00997498	10.7867	0.00102231	0.049995
ENSG00000133627	ACTR3B	131.57	0.0118797	10.7808	0.00102561	0.049995
ENSG00000169032	MAP2K1	1179.87	-0.0104159	10.7571	0.00103879	0.0500085
ENSG00000105655	ISYNA1	2027.75	0.0279399	10.7536	0.00104079	0.0500085
ENSG00000081923	ATP8B1	1424.48	-0.026074	10.7436	0.00104641	0.0500085
ENSG00000083454	P2RX5	180.792	-0.0498645	10.7428	0.00104687	0.0500085
ENSG00000127837	AAMP	2334.93	-0.00811287	10.7405	0.00104818	0.0500085
ENSG00000132002	DNAJB1	2866.49	-0.0101337	10.7356	0.00105095	0.0500085
ENSG00000279312		43.4317	0.0404424	10.7321	0.00105293	0.0500085
ENSG00000115310	RTN4	32223.6	-0.0236574	10.73	0.00105415	0.0500085
ENSG00000120159	CAAP1	240.312	0.0126181	10.7248	0.00105708	0.0500085
ENSG00000101150	TPD52L2	5127.72	-0.00734806	10.7112	0.00106491	0.0502145
ENSG00000187627	RGPD1	28.1387	-0.110964	10.6953	0.00107405	0.0504806
ENSG00000280594	BTG3-AS1	19.1056	0.0272324	10.6819	0.00108186	NA
ENSG00000138642	HERC6	171.362	-0.0562901	10.6727	0.0010873	0.0508851
ENSG00000239665		126.748	0.0181247	10.6686	0.00108971	0.0508851
ENSG00000102882	MAPK3	1980.71	-0.0132669	10.6618	0.00109372	0.0509074
ENSG00000172728	FUT10	224.14	0.0167522	10.6524	0.00109926	0.0509734
ENSG00000166833	NAV2	1416.88	-0.0246887	10.6475	0.0011022	0.0509734
ENSG00000105514	RAB3D	213.369	-0.0256402	10.637	0.00110849	0.0511002
ENSG00000160014	CALM3	7472.55	-0.0163157	10.6161	0.00112107	0.0513563
ENSG00000134644	PUM1	2150.75	0.011954	10.614	0.00112235	0.0513563
ENSG00000170545	SMAGP	433.745	-0.0219701	10.6028	0.00112917	0.0513563
ENSG00000108344	PSMD3	4744.08	-0.00758753	10.6013	0.00113009	0.0513563
ENSG00000185652	NTF3	359.547	-0.0205799	10.5963	0.00113313	0.0513563
ENSG00000136478	TEX2	2791.76	0.0202528	10.5911	0.00113636	0.0513563
ENSG00000163191	S100A11	14041.7	-0.0124969	10.5868	0.00113896	0.0513563
ENSG00000277142	LINC00235	13.9885	0.0352773	10.5819	0.00114202	NA
ENSG00000110092	CCND1	23949.5	-0.0218749	10.5768	0.00114513	0.0514424
ENSG00000101871	MID1	715.572	0.0185134	10.5722	0.001148	0.0514424
ENSG00000116863	ADPRS	715.394	-0.00983218	10.5529	0.00116005	0.0514914
ENSG00000118473	SGIP1	255.538	-0.0521068	10.5422	0.00116681	0.0514914
ENSG00000136810	TXN	4201.73	-0.0190437	10.5399	0.00116825	0.0514914
ENSG00000065665	SEC61A2	237.077	-0.014941	10.5396	0.00116846	0.0514914
ENSG00000250742	LINC02381	183.592	-0.0361895	10.5381	0.00116936	0.0514914
ENSG00000117305	HMGCL	583.426	-0.00902187	10.5358	0.00117082	0.0514914
ENSG00000279473		12.3031	-0.0369593	10.5353	0.00117117	NA
ENSG00000126107	HECTD3	1207.33	-0.0104338	10.5252	0.0011776	0.0514914
ENSG00000136147	PHF11	319.599	-0.0151429	10.5251	0.00117764	0.0514914
ENSG00000002822	MAD1L1	852.343	-0.0131252	10.5167	0.001183	0.0515695
ENSG00000106571	GLI3	895.84	0.0249031	10.5044	0.00119094	0.0517591
ENSG00000254473	UBQLN1-AS1	23.9481	-0.0236352	10.4927	0.00119846	0.051905
ENSG00000158156	XKR8	384.524	-0.0149565	10.4881	0.00120149	0.051905
ENSG00000155287	SLC25A28	451.805	-0.0146784	10.4805	0.00120642	0.0519625
ENSG00000130311	DDA1	2274.87	-0.0109196	10.468	0.00121458	0.0521584
ENSG00000198551	ZNF627	185.305	0.0131459	10.4585	0.00122087	0.0522726
ENSG00000239887	C1orf226	141.147	0.0359095	10.4285	0.00124088	0.0528269
ENSG00000172765	TMCC1	465.948	0.0166506	10.4262	0.00124237	0.0528269
ENSG00000065029	ZNF76	528.945	0.00864815	10.4181	0.00124783	0.0528269
ENSG00000183287	CCBE1	510.865	-0.0498865	10.4172	0.00124846	0.0528269
ENSG00000090615	GOLGA3	5131.08	0.00905019	10.4039	0.00125752	0.0530168
ENSG00000135049	AGTPBP1	124.281	-0.0291652	10.3998	0.00126029	0.0530168
ENSG00000002549	LAP3	1182.37	-0.013588	10.3813	0.00127296	0.0533499
ENSG00000118707	TGIF2	494.323	0.0218342	10.3775	0.0012756	0.0533499
ENSG00000065548	ZC3H15	1359.61	-0.00901067	10.3603	0.00128756	0.0535306
ENSG00000135124	P2RX4	629.857	-0.0185098	10.3601	0.00128767	0.0535306
ENSG00000140990	NDUFB10	2147.1	-0.00921337	10.3505	0.00129437	0.0535306
ENSG00000136824	SMC2	488.195	-0.0193321	10.35	0.00129477	0.0535306
ENSG00000011422	PLAUR	2999.79	-0.0284663	10.3336	0.00130628	0.0538525
ENSG00000130303	BST2	520.852	-0.0827942	10.3159	0.00131888	0.0541092
ENSG00000178057	NDUFAF3	1472.61	-0.0131805	10.3088	0.00132397	0.0541092
ENSG00000090530	P3H2	914.117	-0.0322795	10.3076	0.0013248	0.0541092
ENSG00000106484	MEST	20469.3	0.0326568	10.3039	0.00132751	0.0541092
ENSG00000087095	NLK	381.444	0.0123085	10.2925	0.00133574	0.0542912
ENSG00000107281	NPDC1	3373.13	-0.0149649	10.2705	0.00135172	0.0547866
ENSG00000143882	ATP6V1C2	31.0137	-0.0367954	10.2499	0.0013669	0.055177
ENSG00000106785	TRIM14	423.237	-0.036588	10.2471	0.001369	0.055177
ENSG00000177096	PHETA2	473.648	0.0262525	10.2253	0.00138526	0.0554452
ENSG00000174579	MSL2	343.127	0.01437	10.2252	0.00138533	0.0554452
ENSG00000229124	VIM-AS1	1208.05	-0.0282779	10.2228	0.00138719	0.0554452
ENSG00000129911	KLF16	1318.64	-0.0139349	10.2166	0.00139185	0.0554777
ENSG00000141380	SS18	2048.51	0.00657973	10.1879	0.00141369	0.0561931
ENSG00000109670	FBXW7	541.217	0.013577	10.1623	0.0014334	0.05682
ENSG00000121743	GJA3	19.3018	-0.0579698	10.1618	0.00143378	NA
ENSG00000183876	ARSI	2389.9	0.0317004	10.1555	0.00143874	0.0568755
ENSG00000125166	GOT2	2679.68	-0.00788077	10.134	0.00145558	0.0573842
ENSG00000100225	FBXO7	1988.51	-0.00616568	10.1251	0.0014626	0.0575038
ENSG00000155465	SLC7A7	517.978	0.03289	10.113	0.00147228	0.0575637
ENSG00000277149	TYW1B	64.751	0.0652521	10.1113	0.00147362	0.0575637
ENSG00000152620	NADK2	694.883	0.0230205	10.1082	0.00147609	0.0575637
ENSG00000142507	PSMB6	2159.41	-0.0118778	10.1016	0.00148138	0.0576042
ENSG00000130775	THEMIS2	89.3027	-0.0349905	10.0937	0.00148773	0.0576042
ENSG00000127884	ECHS1	2103.08	-0.00808579	10.0871	0.00149313	0.0576042
ENSG00000185825	BCAP31	4713.09	-0.0121198	10.0792	0.00149952	0.0576042
ENSG00000065183	WDR3	848.758	-0.00914254	10.0695	0.00150747	0.0576042
ENSG00000138735	PDE5A	547.527	-0.0441103	10.0542	0.00151998	0.0576042
ENSG00000170049	KCNAB3	66.3572	0.0321847	10.0518	0.00152202	0.0576042
ENSG00000135424	ITGA7	100.382	-0.0704134	10.0504	0.00152317	0.0576042
ENSG00000142227	EMP3	3935.03	-0.0171807	10.0494	0.00152394	0.0576042
ENSG00000116001	TIA1	802.954	0.0130684	10.0492	0.00152414	0.0576042
ENSG00000142156	COL6A1	77086.7	-0.0292553	10.0452	0.00152746	0.0576042
ENSG00000103091	WDR59	726.007	0.00771097	10.0451	0.00152754	0.0576042
ENSG00000133321	PLAAT4	19.6496	-0.071849	10.0449	0.00152769	NA
ENSG00000124222	STX16	2284.12	0.00830882	10.0433	0.00152903	0.0576042
ENSG00000237886	NALT1	11.9469	0.0365487	10.0343	0.00153649	NA
ENSG00000143158	MPC2	725.863	-0.0155798	10.0291	0.00154085	0.0577205
ENSG00000119737	GPR75	39.7157	0.0262787	10.0267	0.00154291	0.0577205
ENSG00000032389	EIPR1	510.487	-0.0106063	10.0252	0.00154412	0.0577205
ENSG00000127252	PLAAT1	79.9028	0.0394919	9.996	0.00156881	0.0584918
ENSG00000185043	CIB1	1675.75	-0.0100139	9.96433	0.00159602	0.0592862
ENSG00000163430	FSTL1	42472.3	0.0180163	9.96167	0.00159833	0.0592862
ENSG00000165516	KLHDC2	686.315	0.0101033	9.95266	0.00160617	0.0594242
ENSG00000108654	DDX5	12588	0.00763947	9.94099	0.00161639	0.059507
ENSG00000136244	IL6	1176.32	-0.0717803	9.94068	0.00161666	0.059507
ENSG00000130479	MAP1S	1664.18	-0.0132092	9.92228	0.0016329	0.0599223
ENSG00000164054	SHISA5	6390.5	-0.0099257	9.91851	0.00163624	0.0599223
ENSG00000049130	KITLG	422.93	-0.0394564	9.9066	0.00164687	0.0601586
ENSG00000164111	ANXA5	25932	-0.0131777	9.90157	0.00165138	0.060171
ENSG00000143631	FLG	10.7839	0.0974312	9.89239	0.00165964	NA
ENSG00000166173	LARP6	3216.05	-0.0163563	9.88851	0.00166314	0.0603227
ENSG00000013275	PSMC4	2182.27	-0.00922535	9.88756	0.001664	0.0603227
ENSG00000119013	NDUFB3	752.773	-0.0102491	9.87925	0.00167153	0.0603227
ENSG00000174917	MICOS13	938.165	-0.0102132	9.87844	0.00167226	0.0603227
ENSG00000260412		123.347	0.0526009	9.85838	0.0016906	0.0608321
ENSG00000198890	PRMT6	303.201	0.0143698	9.85023	0.00169811	0.0609502
ENSG00000256500		864.617	-0.0138985	9.84265	0.00170511	0.0610498
ENSG00000099338	CATSPERG	16.9655	-0.0433354	9.8253	0.00172128	NA
ENSG00000184719	RNLS	101.608	-0.0155584	9.82445	0.00172207	0.061297
ENSG00000119760	SUPT7L	1094.18	0.00760503	9.82239	0.001724	0.061297
ENSG00000147883	CDKN2B	5791.99	0.0401	9.81695	0.00172911	0.061297
ENSG00000048028	USP28	525.801	0.0120295	9.81173	0.00173402	0.061297
ENSG00000168894	RNF181	1072	-0.0121957	9.80925	0.00173636	0.061297
ENSG00000087301	TXNDC16	135.148	0.0253404	9.80804	0.00173751	0.061297
ENSG00000262919	CCNQ	617.711	-0.00890227	9.79173	0.00175298	0.0615529
ENSG00000168769	TET2	286.011	0.0154169	9.7907	0.00175397	0.0615529
ENSG00000163170	BOLA3	411.58	-0.0140478	9.78694	0.00175756	0.0615529
ENSG00000143537	ADAM15	3828.48	-0.0151423	9.77442	0.00176957	0.0618234
ENSG00000147119	CHST7	266.319	-0.0225646	9.76799	0.00177577	0.0618824
ENSG00000130340	SNX9	1843.05	-0.0125235	9.76144	0.0017821	0.0618824
ENSG00000127445	PIN1	1312.32	-0.0102235	9.75609	0.0017873	0.0618824
ENSG00000126368	NR1D1	535.426	-0.0237362	9.75495	0.00178841	0.0618824
ENSG00000169760	NLGN1	47.0818	-0.0562118	9.74562	0.0017975	0.0620482
ENSG00000198876	DCAF12	763.795	0.00927811	9.72123	0.00182151	0.0627269
ENSG00000099795	NDUFB7	1676.61	-0.00970808	9.70092	0.00184176	0.0628817
ENSG00000153179	RASSF3	863.364	-0.0204008	9.69884	0.00184385	0.0628817
ENSG00000116299	ELAPOR1	127.904	0.0176847	9.69866	0.00184402	0.0628817
ENSG00000105393	BABAM1	1868.09	-0.00739875	9.69492	0.00184778	0.0628817
ENSG00000176845	METRNL	3991.59	-0.0135592	9.69469	0.00184801	0.0628817
ENSG00000102030	NAA10	2240.52	-0.00938311	9.69058	0.00185215	0.0628817
ENSG00000144642	RBMS3	838.727	0.0176478	9.68472	0.00185806	0.0629342
ENSG00000224051	CPTP	1071.25	-0.0104451	9.68008	0.00186276	0.0629458
ENSG00000116903	EXOC8	339.674	0.0117336	9.65257	0.00189087	0.063746
ENSG00000119185	ITGB1BP1	1232.02	-0.00976565	9.64561	0.00189804	0.0638389
ENSG00000106772	PRUNE2	409.573	-0.0500222	9.63885	0.00190504	0.0639252
ENSG00000120949	TNFRSF8	15.2785	-0.0544382	9.63571	0.00190831	NA
ENSG00000155366	RHOC	10158.9	-0.0119915	9.62763	0.00191671	0.0641658
ENSG00000166444	DENND2B	3212.29	0.0189329	9.62343	0.0019211	0.0641658
ENSG00000183530	PRR14L	980.318	0.00991539	9.61611	0.00192877	0.0642306
ENSG00000233237	LINC00472	39.7083	0.0342628	9.60642	0.00193899	0.0642306
ENSG00000115963	RND3	9347.13	-0.031913	9.60514	0.00194034	0.0642306
ENSG00000142173	COL6A2	61246.1	-0.0269712	9.60083	0.0019449	0.0642306
ENSG00000204176	SYT15	278.438	0.0515716	9.60044	0.0019453	0.0642306
ENSG00000147576	ADHFE1	64.6774	0.024574	9.59191	0.00195437	0.0643296
ENSG00000005379	TSPOAP1	197.373	0.0478981	9.58923	0.00195722	0.0643296
ENSG00000171159	BBLN	1212.32	-0.0122806	9.57982	0.00196728	0.0645134
ENSG00000053254	FOXN3	1734.65	0.0195006	9.56225	0.0019862	0.0648591
ENSG00000137962	ARHGAP29	887.744	-0.0310885	9.56168	0.00198681	0.0648591
ENSG00000196968	FUT11	719.587	0.0141932	9.55402	0.00199512	0.064875
ENSG00000106688	SLC1A1	715.378	-0.0254091	9.55294	0.00199629	0.064875
ENSG00000196460	RFX8	36.9912	-0.050216	9.53422	0.00201675	0.0652882
ENSG00000168528	SERINC2	1477.34	-0.033482	9.52927	0.00202221	0.0652882
ENSG00000028116	VRK2	262.168	-0.0126979	9.52488	0.00202704	0.0652882
ENSG00000223764	LINC02593	142.517	0.0537509	9.52387	0.00202817	0.0652882
ENSG00000134909	ARHGAP32	606.533	0.0139425	9.52073	0.00203163	0.0652882
ENSG00000253719	ATXN7L3B	1591.62	0.00858132	9.51654	0.00203629	0.0652924
ENSG00000100902	PSMA6	1938.93	-0.00927785	9.50904	0.00204462	0.0653883
ENSG00000239697	TNFSF12	543.356	-0.0163773	9.50333	0.002051	0.0653883
ENSG00000034152	MAP2K3	1772.27	-0.0142651	9.50165	0.00205287	0.0653883
ENSG00000158615	PPP1R15B	1336.08	0.00976686	9.48414	0.00207255	0.0656219
ENSG00000177613	CSTF2T	534.07	0.0151992	9.48361	0.00207315	0.0656219
ENSG00000115419	GLS	11540.5	0.0237121	9.483	0.00207385	0.0656219
ENSG00000213719	CLIC1	9479.37	-0.0135145	9.45225	0.0021089	0.0659379
ENSG00000106367	AP1S1	2469.37	-0.0109751	9.4501	0.00211138	0.0659379
ENSG00000198315	ZKSCAN8	744.713	0.0114859	9.44589	0.00211623	0.0659379
ENSG00000180611	MB21D2	434.505	0.018838	9.44386	0.00211857	0.0659379
ENSG00000104419	NDRG1	1103.55	-0.0374572	9.44185	0.0021209	0.0659379
ENSG00000105755	ETHE1	676.901	-0.0210931	9.43378	0.00213024	0.0659379
ENSG00000141068	KSR1	1373.92	0.0247421	9.43252	0.00213172	0.0659379
ENSG00000126247	CAPNS1	11968.9	-0.0130826	9.43237	0.00213188	0.0659379
ENSG00000127824	TUBA4A	297.379	-0.0299699	9.42777	0.00213725	0.0659379
ENSG00000261136		10.1572	0.0485459	9.41746	0.00214929	NA
ENSG00000259426	KIF23-AS1	127.605	0.0222602	9.41457	0.00215268	0.0659379
ENSG00000065060	UHRF1BP1	801.598	0.0178202	9.41189	0.00215584	0.0659379
ENSG00000163481	RNF25	859.367	-0.0104104	9.40329	0.00216596	0.0659379
ENSG00000102109	PCSK1N	28.5862	-0.0766197	9.39566	0.00217499	0.0659379
ENSG00000132485	ZRANB2	1217.65	0.00993875	9.3891	0.00218279	0.0659379
ENSG00000137992	DBT	381.224	0.0143628	9.38815	0.00218393	0.0659379
ENSG00000239713	APOBEC3G	99.6079	-0.030897	9.38741	0.00218481	0.0659379
ENSG00000140937	CDH11	21107.3	0.0222458	9.38368	0.00218925	0.0659379
ENSG00000158246	TENT5B	222.292	0.04304	9.38238	0.00219081	0.0659379
ENSG00000142634	EFHD2	2057.2	-0.0162976	9.38151	0.00219185	0.0659379
ENSG00000167671	UBXN6	4051.98	-0.00766692	9.37767	0.00219644	0.0659379
ENSG00000175592	FOSL1	2623.69	-0.0314603	9.37412	0.00220071	0.0659379
ENSG00000204138	PHACTR4	1086.51	0.0108896	9.37311	0.00220191	0.0659379
ENSG00000166228	PCBD1	932.256	-0.0136781	9.37225	0.00220295	0.0659379
ENSG00000189423	USP32P3	36.0311	0.0417461	9.37067	0.00220485	0.0659379
ENSG00000184216	IRAK1	7796.75	0.0152874	9.3662	0.00221023	0.0659379
ENSG00000110066	KMT5B	591.159	0.00685229	9.36565	0.0022109	0.0659379
ENSG00000110104	CCDC86	1063.02	-0.0159636	9.36528	0.00221134	0.0659379
ENSG00000162746	FCRLB	33.6426	-0.0321135	9.36491	0.00221179	0.0659379
ENSG00000111877	MCM9	163.154	0.0138945	9.35633	0.00222216	0.0660564
ENSG00000179029	TMEM107	76.2281	-0.0176842	9.35406	0.00222492	0.0660564
ENSG00000133740	E2F5	105.896	-0.0164044	9.34388	0.00223732	0.066288
ENSG00000262877		12.6713	0.0459747	9.33616	0.00224676	NA
ENSG00000184979	USP18	96.983	-0.0434702	9.33479	0.00224844	0.0663816
ENSG00000168904	LRRC28	228.445	0.00946526	9.33312	0.00225049	0.0663816
ENSG00000175567	UCP2	111.34	-0.044097	9.33004	0.00225428	0.0663816
ENSG00000163719	MTMR14	814.196	-0.00726618	9.31857	0.00226843	0.0664073
ENSG00000169914	OTUD3	376.741	0.0147494	9.31739	0.0022699	0.0664073
ENSG00000127527	EPS15L1	1125.13	-0.00709363	9.31411	0.00227396	0.0664073
ENSG00000025772	TOMM34	1207.56	-0.0148312	9.31371	0.00227445	0.0664073
ENSG00000233461		65.6388	-0.0213954	9.30911	0.00228018	0.0664073
ENSG00000132688	NES	439.776	-0.0547468	9.30045	0.00229098	0.0664073
ENSG00000136783	NIPSNAP3A	515.719	-0.0129195	9.29937	0.00229233	0.0664073
ENSG00000255198	SNHG9	74.2837	-0.0226303	9.29925	0.00229247	0.0664073
ENSG00000165288	BRWD3	311.881	0.0133149	9.29426	0.00229873	0.0664073
ENSG00000196550	FAM72A	49.732	-0.0244674	9.29231	0.00230117	0.0664073
ENSG00000115368	WDR75	848.451	-0.00912361	9.28592	0.00230922	0.0664147
ENSG00000112992	NNT	1541.68	0.0129029	9.2848	0.00231064	0.0664147
ENSG00000175768	TOMM5	1483.8	-0.00941752	9.27616	0.00232155	0.0665958
ENSG00000272356		49.959	0.0214642	9.25997	0.00234217	0.067054
ENSG00000197343	ZNF655	1134.88	0.00842756	9.25561	0.00234775	0.0670787
ENSG00000222041	CYTOR	1274.03	-0.0200951	9.24643	0.00235956	0.0670787
ENSG00000152520	PAN3	432.041	0.0107604	9.24504	0.00236134	0.0670787
ENSG00000159208	CIART	100.449	-0.0251385	9.24481	0.00236163	0.0670787
ENSG00000172336	POP7	556.896	-0.0111305	9.24018	0.00236762	0.0671167
ENSG00000145721	LIX1	17.3353	0.113289	9.21865	0.00239562	NA
ENSG00000108797	CNTNAP1	2574.09	-0.022038	9.21518	0.00240017	0.0675089
ENSG00000134996	OSTF1	606.186	-0.00912448	9.21515	0.00240021	0.0675089
ENSG00000164283	ESM1	132.696	-0.0623815	9.21258	0.00240357	0.0675089
ENSG00000157540	DYRK1A	1113.89	0.00878017	9.21145	0.00240506	0.0675089
ENSG00000137767	SQOR	971.996	-0.0199145	9.20844	0.00240902	0.0675089
ENSG00000129355	CDKN2D	170.494	-0.0152432	9.20805	0.00240953	0.0675089
ENSG00000111186	WNT5B	2512.58	-0.0389677	9.19586	0.00242563	0.0677142
ENSG00000204941	PSG5	141.245	-0.0775839	9.19487	0.00242695	0.0677142
ENSG00000145216	FIP1L1	1260.08	-0.00783125	9.19186	0.00243093	0.0677142
ENSG00000047056	WDR37	841.882	0.014271	9.17804	0.00244936	0.0680959
ENSG00000058673	ZC3H11A	3829.56	0.00907715	9.16767	0.00246328	0.0683513
ENSG00000186020	ZNF529	174.926	0.0120381	9.1517	0.00248487	0.0687173
ENSG00000145390	USP53	1002.41	-0.0319655	9.15087	0.00248599	0.0687173
ENSG00000128245	YWHAH	2767.22	-0.0125253	9.14243	0.0024975	0.0689032
ENSG00000108774	RAB5C	4561.12	-0.00662923	9.13615	0.00250608	0.069008
ENSG00000253293	HOXA10	725.284	0.0214493	9.13003	0.00251447	0.0691072
ENSG00000164465	DCBLD1	3345.17	0.0217576	9.12449	0.0025221	0.0691278
ENSG00000065802	ASB1	1156.29	-0.0139603	9.12253	0.0025248	0.0691278
ENSG00000131100	ATP6V1E1	3928.13	-0.0105919	9.11628	0.00253345	0.0692331
ENSG00000055609	KMT2C	1266.06	0.0141427	9.11181	0.00253964	0.0692485
ENSG00000073146	MOV10L1	312.993	0.0317394	9.10896	0.00254361	0.0692485
ENSG00000006451	RALA	1932.21	-0.0271962	9.09334	0.00256542	0.0697109
ENSG00000162383	SLC1A7	17.5992	-0.0752447	9.08253	0.00258063	NA
ENSG00000125534	PPDPF	8337.03	-0.0196562	9.07813	0.00258685	0.0699348
ENSG00000128335	APOL2	1561.71	-0.0147985	9.07312	0.00259394	0.0699348
ENSG00000015475	BID	1039.12	-0.0123695	9.07141	0.00259637	0.0699348
ENSG00000205683	DPF3	96.5802	-0.0267724	9.06973	0.00259875	0.0699348
ENSG00000121350	PYROXD1	315.816	-0.0201567	9.0668	0.00260292	0.0699348
ENSG00000133027	PEMT	464.646	-0.0121115	9.06579	0.00260437	0.0699348
ENSG00000185304	RGPD2	31.6518	-0.114857	9.06352	0.00260759	0.0699348
ENSG00000059378	PARP12	247.503	-0.0266397	9.05362	0.00262175	0.0700721
ENSG00000115233	PSMD14	1697.14	-0.00982441	9.05315	0.00262242	0.0700721
ENSG00000172159	FRMD3	49.9512	0.0503436	9.04898	0.00262841	0.0701023
ENSG00000154277	UCHL1	20656.7	-0.0118461	9.0451	0.002634	0.0701218
ENSG00000119682	AREL1	1383.49	0.00836451	9.03538	0.00264804	0.0703656
ENSG00000183696	UPP1	730.177	-0.0328065	9.02811	0.0026586	0.0703827
ENSG00000174348	PODN	382.423	-0.0800215	9.02724	0.00265985	0.0703827
ENSG00000111775	COX6A1	3555.53	-0.00951171	9.02487	0.00266331	0.0703827
ENSG00000180834	MAP6D1	72.1675	-0.0184891	9.00302	0.00269533	0.0709733
ENSG00000126709	IFI6	2423.72	-0.062258	9.00291	0.0026955	0.0709733
ENSG00000102007	PLP2	3076.16	-0.0190162	8.99496	0.00270725	0.0711528
ENSG00000188687	SLC4A5	12.8789	-0.035651	8.97607	0.00273539	NA
ENSG00000130635	COL5A1	112492	0.0257825	8.97033	0.00274399	0.0719097
ENSG00000153214	TMEM87B	2537.53	0.0188762	8.96898	0.00274602	0.0719097
ENSG00000133313	CNDP2	2091.95	-0.0111563	8.95728	0.00276366	0.0721883
ENSG00000204619	PPP1R11	1336.32	-0.00734756	8.95431	0.00276816	0.0721883
ENSG00000123096	SSPN	509.872	0.0259215	8.95075	0.00277356	0.0721883
ENSG00000139266	MARCHF9	139.367	-0.0298305	8.94674	0.00277966	0.0721883
ENSG00000104812	GYS1	2367.34	-0.0159596	8.94425	0.00278345	0.0721883
ENSG00000003989	SLC7A2	348.096	-0.07251	8.94213	0.00278667	0.0721883
ENSG00000108523	RNF167	2083.96	-0.0102104	8.93596	0.0027961	0.0723028
ENSG00000105401	CDC37	9724.14	-0.00851169	8.93084	0.00280396	0.0723763
ENSG00000178980	SELENOW	2178.05	-0.0135027	8.91478	0.00282872	0.072885
ENSG00000158483	FAM86C1P	230.426	-0.0153241	8.91142	0.00283392	0.0728889
ENSG00000155893	PXYLP1	218.792	0.0210271	8.90148	0.0028494	0.0730311
ENSG00000178741	COX5A	1963.48	-0.00838997	8.90137	0.00284957	0.0730311
ENSG00000123066	MED13L	1952.31	0.011952	8.89453	0.00286026	0.0731749
ENSG00000257354	MIRLET7IHG	290.992	0.0185701	8.88565	0.00287421	0.0733203
ENSG00000138375	SMARCAL1	631.981	-0.0101183	8.88444	0.0028761	0.0733203
ENSG00000144460	NYAP2	23.6797	0.0872687	8.87677	0.00288822	0.0734685
ENSG00000177885	GRB2	2582.72	-0.00521058	8.87432	0.0028921	0.0734685
ENSG00000091129	NRCAM	25.5667	-0.0384655	8.86413	0.00290829	0.073689
ENSG00000105974	CAV1	6460.8	-0.0229246	8.85667	0.00292019	0.073689
ENSG00000124733	MEA1	1493.51	-0.0102655	8.85627	0.00292084	0.073689
ENSG00000089220	PEBP1	5112.9	-0.00772736	8.85604	0.00292121	0.073689
ENSG00000074410	CA12	1854.07	-0.040793	8.83936	0.00294803	0.0741375
ENSG00000141753	IGFBP4	21810	-0.0207123	8.83859	0.00294926	0.0741375
ENSG00000106263	EIF3B	5601.08	-0.00749284	8.82178	0.00297656	0.0746935
ENSG00000167553	TUBA1C	8968.12	-0.0189887	8.81013	0.00299562	0.0750413
ENSG00000125971	DYNLRB1	3018.59	-0.0105129	8.8029	0.00300752	0.0751579
ENSG00000137996	RTCA	1184.5	-0.0093897	8.80098	0.00301069	0.0751579
ENSG00000175066	GK5	326.866	0.0133472	8.79762	0.00301623	0.0751662
ENSG00000225921	NOL7	1559.25	-0.0095008	8.79255	0.00302463	0.0752456
ENSG00000186501	TMEM222	1237.12	-0.00774083	8.7884	0.00303152	0.0752598
ENSG00000106077	ABHD11	197.621	-0.0170412	8.7832	0.00304018	0.0752598
ENSG00000271862		12.6154	0.0303447	8.78095	0.00304393	NA
ENSG00000119917	IFIT3	634.309	-0.0469002	8.77416	0.00305529	0.0752598
ENSG00000078369	GNB1	11716.7	-0.00513551	8.77408	0.00305542	0.0752598
ENSG00000046647	GEMIN8	209.483	0.0111315	8.77365	0.00305613	0.0752598
ENSG00000112365	ZBTB24	381.342	0.0125673	8.77343	0.0030565	0.0752598
ENSG00000068885	IFT80	479.507	0.0132226	8.76718	0.00306698	0.0753262
ENSG00000153944	MSI2	1191.79	0.0151383	8.76561	0.00306964	0.0753262
ENSG00000260597		117.996	0.0302928	8.75879	0.00308113	0.0754799
ENSG00000198081	ZBTB14	215.304	0.00961283	8.75184	0.0030929	0.075525
ENSG00000121989	ACVR2A	745.8	0.0253157	8.75152	0.00309344	0.075525
ENSG00000119242	CCDC92	1917.95	-0.00860114	8.74545	0.00310376	0.075544
ENSG00000112144	CILK1	527.387	0.018168	8.7449	0.00310469	0.075544
ENSG00000175344	CHRNA7	13.5688	-0.0586301	8.73392	0.00312345	NA
ENSG00000069329	VPS35	2549.1	-0.00616991	8.73207	0.00312661	0.0758679
ENSG00000141646	SMAD4	1065.38	0.0106968	8.72874	0.00313232	0.0758679
ENSG00000141682	PMAIP1	211.346	-0.0376678	8.7279	0.00313378	0.0758679
ENSG00000170542	SERPINB9	684.738	0.0276645	8.71897	0.00314916	0.0761127
ENSG00000122557	HERPUD2	704.161	0.00965746	8.71327	0.00315901	0.0762231
ENSG00000010278	CD9	3586.32	-0.0316633	8.7073	0.00316939	0.0762754
ENSG00000227825	SLC9A7P1	91.0008	0.0270037	8.70594	0.00317175	0.0762754
ENSG00000067445	TRO	751.086	0.026524	8.70148	0.00317952	0.076335
ENSG00000206530	CFAP44	128.063	0.0288683	8.68763	0.00320377	0.0767894
ENSG00000060140	STYK1	10.5797	-0.062463	8.67517	0.00322575	NA
ENSG00000159842	ABR	3981.22	-0.00999384	8.6642	0.00324522	0.0776539
ENSG00000103707	MTFMT	275.85	-0.00714544	8.65559	0.00326059	0.0778776
ENSG00000204564	C6orf136	239.162	-0.0135917	8.65059	0.00326956	0.0778776
ENSG00000270953		34.9829	0.0344958	8.64992	0.00327076	0.0778776
ENSG00000161202	DVL3	5681.37	0.0107532	8.63823	0.00329181	0.078121
ENSG00000112378	PERP	2643.23	-0.0195111	8.6313	0.00330436	0.078121
ENSG00000213516	RBMXL1	263.068	0.0126211	8.63115	0.00330464	0.078121
ENSG00000156502	SUPV3L1	719.037	-0.0131714	8.6308	0.00330527	0.078121
ENSG00000158636	EMSY	415.427	0.0102879	8.62569	0.00331454	0.078121
ENSG00000167085	PHB1	2969.67	-0.0083307	8.61994	0.00332503	0.078121
ENSG00000103876	FAH	939.286	-0.0175521	8.61823	0.00332816	0.078121
ENSG00000174516	PELI3	325.012	-0.0141907	8.61676	0.00333083	0.078121
ENSG00000103769	RAB11A	2517.69	-0.00786117	8.61639	0.00333151	0.078121
ENSG00000185591	SP1	1538.88	0.00726906	8.61442	0.00333512	0.078121
ENSG00000273420		123.433	-0.0280235	8.60775	0.00334736	0.078247
ENSG00000185753	CXorf38	286.589	-0.0107284	8.60558	0.00335135	0.078247
ENSG00000117525	F3	2098.92	-0.0492426	8.60089	0.00335999	0.078322
ENSG00000139508	SLC46A3	562.079	0.0357782	8.59584	0.00336932	0.0784128
ENSG00000110042	DTX4	337.605	0.0271455	8.58623	0.00338714	0.0787006
ENSG00000138347	MYPN	112.403	-0.0599472	8.57658	0.00340515	0.0788754
ENSG00000106153	CHCHD2	4960.24	-0.0105289	8.57434	0.00340933	0.0788754
ENSG00000108788	MLX	1237.25	-0.00867215	8.57342	0.00341106	0.0788754
ENSG00000180357	ZNF609	1741.37	0.00913447	8.56928	0.00341881	0.0789281
ENSG00000125266	EFNB2	2523.18	0.0327646	8.55897	0.00343824	0.079151
ENSG00000174652	ZNF266	274.763	0.0197389	8.55833	0.00343944	0.079151
ENSG00000171497	PPID	590.253	-0.00788609	8.55273	0.00345004	0.0792607
ENSG00000085491	SLC25A24	1218.77	0.0141347	8.55002	0.00345519	0.0792607
ENSG00000160877	NACC1	4608.19	-0.00851334	8.54351	0.00346756	0.0792773
ENSG00000084112	SSH1	3704.23	0.0126517	8.54294	0.00346864	0.0792773
ENSG00000089693	MLF2	6315.11	-0.00788276	8.54097	0.0034724	0.0792773
ENSG00000106615	RHEB	2598.49	-0.00717396	8.53608	0.00348174	0.0793651
ENSG00000148158	SNX30	1169.32	0.0191139	8.52494	0.00350312	0.0797263
ENSG00000134248	LAMTOR5	1116.63	-0.00852537	8.50325	0.00354513	0.0805554
ENSG00000112763	BTN2A1	1125.32	-0.0136934	8.49659	0.00355812	0.0806508
ENSG00000007944	MYLIP	173.134	0.0234855	8.49396	0.00356327	0.0806508
ENSG00000071462	BUD23	1566.83	-0.00917515	8.49252	0.0035661	0.0806508
ENSG00000188153	COL4A5	1118.8	0.016686	8.48799	0.00357499	0.0807164
ENSG00000221818	EBF2	9.9503	-0.068377	8.48735	0.00357624	NA
ENSG00000132478	UNK	619.487	0.00830635	8.48507	0.00358073	0.0807164
ENSG00000279923		10.0406	0.0312576	8.48278	0.00358525	NA
ENSG00000110955	ATP5F1B	9887.92	-0.00828791	8.48251	0.00358578	0.0807164
ENSG00000158258	CLSTN2	961.53	0.0695762	8.47933	0.00359205	0.0807317
ENSG00000143429	LSP1P4	273.199	-0.0240654	8.4603	0.00362982	0.0814536
ENSG00000185022	MAFF	1190.64	-0.0239843	8.4417	0.00366714	0.0819691
ENSG00000198931	APRT	1864.09	-0.0124003	8.44084	0.00366886	0.0819691
ENSG00000166275	BORCS7	236.307	0.0159671	8.44036	0.00366984	0.0819691
ENSG00000198453	ZNF568	134.073	0.0125774	8.43597	0.0036787	0.0820402
ENSG00000271816	BMS1P4	52.0882	0.0215151	8.42929	0.00369224	0.0820961
ENSG00000119138	KLF9	762.574	0.0236485	8.42763	0.00369562	0.0820961
ENSG00000128602	SMO	939.775	0.0180591	8.42005	0.00371106	0.0820961
ENSG00000172789	HOXC5	28.5093	-0.0440725	8.41303	0.00372542	0.0820961
ENSG00000145908	ZNF300	139.385	0.0203361	8.40954	0.00373258	0.0820961
ENSG00000172031	EPHX4	21.8877	-0.0403109	8.40324	0.00374553	0.0820961
ENSG00000106400	ZNHIT1	1956.64	-0.00902556	8.39978	0.00375267	0.0820961
ENSG00000177125	ZBTB34	211.253	0.0143001	8.39814	0.00375605	0.0820961
ENSG00000078018	MAP2	55.8065	-0.0788468	8.39645	0.00375955	0.0820961
ENSG00000163466	ARPC2	12254	-0.00722827	8.3939	0.00376483	0.0820961
ENSG00000138166	DUSP5	418.249	-0.0444924	8.39367	0.0037653	0.0820961
ENSG00000132507	EIF5A	13119.9	-0.0123974	8.39312	0.00376644	0.0820961
ENSG00000278071		22.8176	0.0272341	8.38995	0.00377301	0.0820961
ENSG00000153885	KCTD15	1143.14	0.0165052	8.38641	0.00378037	0.0820961
ENSG00000264538	SUZ12P1	103.137	0.0156287	8.38307	0.00378732	0.0820961
ENSG00000129226	CD68	1044.15	-0.0309684	8.38063	0.00379241	0.0820961
ENSG00000226287	TMEM191A	47.2732	-0.0218129	8.3797	0.00379434	0.0820961
ENSG00000119986	AVPI1	640.052	-0.0213643	8.37757	0.0037988	0.0820961
ENSG00000166046	TCP11L2	149.158	0.0214452	8.37581	0.00380249	0.0820961
ENSG00000142669	SH3BGRL3	14919.2	-0.0190928	8.37439	0.00380546	0.0820961
ENSG00000139163	ETNK1	724.644	0.0163633	8.3733	0.00380773	0.0820961
ENSG00000255182		54.028	0.0208221	8.37195	0.00381056	0.0820961
ENSG00000153896	ZNF599	86.9558	0.0123822	8.37123	0.00381207	0.0820961
ENSG00000183336	BOLA2	189.659	-0.0129998	8.36783	0.00381921	0.0821273
ENSG00000147573	TRIM55	16.9468	-0.0720084	8.36305	0.00382928	NA
ENSG00000204946	ZNF783	398.932	0.011137	8.33751	0.00388348	0.0833849
ENSG00000173692	PSMD1	4187.64	-0.00617144	8.33317	0.00389276	0.0834076
ENSG00000001036	FUCA2	2897.32	-0.0139854	8.33162	0.00389609	0.0834076
ENSG00000101412	E2F1	175.224	-0.0313964	8.32085	0.00391927	0.0837535
ENSG00000176340	COX8A	2016.32	-0.0117673	8.31872	0.00392386	0.0837535
ENSG00000147099	HDAC8	370.063	0.00818844	8.31434	0.00393332	0.0838315
ENSG00000108828	VAT1	15966.8	-0.0135428	8.3097	0.00394338	0.0839219
ENSG00000100412	ACO2	2999.4	-0.0058553	8.30643	0.0039505	0.0839495
ENSG00000181610	MRPS23	703.417	-0.00740302	8.29814	0.00396858	0.0841942
ENSG00000172354	GNB2	6622.19	-0.00926566	8.2958	0.00397368	0.0841942
ENSG00000111229	ARPC3	5249.44	-0.00779963	8.28935	0.00398783	0.0843188
ENSG00000139190	VAMP1	310.845	0.0222329	8.28779	0.00399125	0.0843188
ENSG00000181104	F2R	2217.49	0.0276692	8.27123	0.00402783	0.0848775
ENSG00000120306	CYSTM1	1067.02	-0.0167492	8.27049	0.00402946	0.0848775
ENSG00000135090	TAOK3	1105.41	-0.00861491	8.26251	0.0040472	0.0851269
ENSG00000172216	CEBPB	3538.24	-0.0189185	8.25483	0.00406437	0.0852642
ENSG00000174428	GTF2IRD2B	506.909	0.0111458	8.25431	0.00406554	0.0852642
ENSG00000105443	CYTH2	2310.05	0.0111124	8.2399	0.00409795	0.0855469
ENSG00000247315	ZCCHC3	643.015	0.0102664	8.23819	0.0041018	0.0855469
ENSG00000154027	AK5	288.013	-0.0375281	8.23776	0.00410277	0.0855469
ENSG00000120868	APAF1	621.124	0.0158719	8.23498	0.00410907	0.0855469
ENSG00000185090	MANEAL	53.4473	-0.0313213	8.23495	0.00410913	0.0855469
ENSG00000260604		105.688	0.0599973	8.23254	0.0041146	0.0855469
ENSG00000143390	RFX5	700.847	0.0100167	8.22285	0.00413661	0.0858187
ENSG00000143862	ARL8A	1661.67	-0.00998434	8.22156	0.00413957	0.0858187
ENSG00000101126	ADNP	1781.84	0.00657515	8.2138	0.0041573	0.0860626
ENSG00000108669	CYTH1	966.69	0.0170857	8.21028	0.00416537	0.0861061
ENSG00000138778	CENPE	206.987	-0.0347664	8.19752	0.00419478	0.08659
ENSG00000163738	MTHFD2L	84.1198	-0.0132182	8.1909	0.00421009	0.0867821
ENSG00000158691	ZSCAN12	124.302	0.013102	8.17743	0.00424148	0.0872571
ENSG00000163528	CHCHD4	145.548	-0.01181	8.17393	0.00424967	0.0872571
ENSG00000135940	COX5B	1944.87	-0.00983978	8.17005	0.00425878	0.0872571
ENSG00000078687	TNRC6C	440.927	0.0104693	8.16547	0.00426953	0.0872571
ENSG00000154175	ABI3BP	4130.93	-0.0741098	8.16498	0.00427069	0.0872571
ENSG00000104332	SFRP1	1342.73	-0.0563359	8.16488	0.00427093	0.0872571
ENSG00000144136	SLC20A1	6073.48	-0.0226403	8.16295	0.00427547	0.0872571
ENSG00000123575	FAM199X	492.483	0.0132065	8.16035	0.0042816	0.0872588
ENSG00000054277	OPN3	681.594	0.0240637	8.15021	0.00430561	0.0875398
ENSG00000155592	ZKSCAN2	249.342	0.00864528	8.14941	0.00430752	0.0875398
ENSG00000157881	PANK4	496.327	-0.00857661	8.14355	0.00432145	0.0876993
ENSG00000165807	PPP1R36	13.3434	-0.027618	8.13997	0.00433001	NA
ENSG00000272620	AFAP1-AS1	35.4528	0.0800636	8.13945	0.00433125	0.0877746
ENSG00000166411	IDH3A	735.145	-0.00671893	8.12899	0.0043563	0.0881586
ENSG00000080573	COL5A3	129.348	-0.0662591	8.11384	0.00439286	0.0887738
ENSG00000204435	CSNK2B	3053.6	-0.00777368	8.10736	0.00440859	0.0889286
ENSG00000178127	NDUFV2	1644.34	-0.0105631	8.10253	0.00442035	0.0889286
ENSG00000204498	NFKBIL1	494.709	-0.010374	8.10186	0.00442199	0.0889286
ENSG00000250899		122.09	0.0195428	8.10056	0.00442517	0.0889286
ENSG00000143801	PSEN2	608.644	-0.016145	8.09517	0.00443833	0.0889831
ENSG00000136280	CCM2	1456.54	-0.00719729	8.09441	0.00444021	0.0889831
ENSG00000189337	KAZN	632.44	0.0137398	8.087	0.00445839	0.0890166
ENSG00000134072	CAMK1	293.264	-0.0172903	8.08652	0.00445956	0.0890166
ENSG00000102870	ZNF629	1196.24	0.00713999	8.08619	0.00446039	0.0890166
ENSG00000131149	GSE1	1991.26	0.0120117	8.08231	0.00446994	0.089084
ENSG00000099139	PCSK5	242.475	0.0284599	8.07385	0.00449086	0.0893773
ENSG00000266472	MRPS21	1295.69	-0.0090102	8.06696	0.00450796	0.0895941
ENSG00000125818	PSMF1	2660.28	-0.00860109	8.06201	0.0045203	0.0896019
ENSG00000139173	TMEM117	293.377	0.016999	8.06075	0.00452345	0.0896019
ENSG00000166166	TRMT61A	665.911	-0.009874	8.05934	0.00452698	0.0896019
ENSG00000113645	WWC1	121.831	-0.0422769	8.05221	0.00454481	0.0897148
ENSG00000173418	NAA20	870.67	-0.00873651	8.05209	0.00454512	0.0897148
ENSG00000135046	ANXA1	11735.9	-0.0169939	8.03898	0.00457812	0.0902428
ENSG00000272414	FAM47E-STBD1	150.171	-0.0258572	8.03637	0.00458473	0.0902498
ENSG00000170681	CAVIN4	46.0974	-0.036515	8.0278	0.00460649	0.0905545
ENSG00000130150	MOSPD2	537.588	0.0149545	8.02276	0.00461931	0.0905806
ENSG00000130725	UBE2M	2244.69	-0.00752873	8.02024	0.00462573	0.0905806
ENSG00000148450	MSRB2	619.694	-0.011	8.01989	0.00462665	0.0905806
ENSG00000127589	TUBBP1	229.502	-0.0186836	8.01577	0.00463719	0.0906639
ENSG00000143369	ECM1	3859.28	-0.0293262	8.01049	0.00465072	0.0907124
ENSG00000165698	SPACA9	157.95	-0.0130824	8.00717	0.00465926	0.0907124
ENSG00000134153	EMC7	2321.75	-0.0128725	8.00595	0.0046624	0.0907124
ENSG00000126767	ELK1	1252.74	-0.00884309	7.99999	0.00467776	0.0907124
ENSG00000131435	PDLIM4	2770.37	-0.0134332	7.99865	0.00468122	0.0907124
ENSG00000090339	ICAM1	9944.17	-0.0317226	7.99798	0.00468295	0.0907124
ENSG00000259953	LINC02977	63.6706	0.0215558	7.9977	0.00468368	0.0907124
ENSG00000226380		313.751	-0.0318961	7.9863	0.00471327	0.0911633
ENSG00000136877	FPGS	1895.97	-0.00953532	7.97936	0.00473136	0.091225
ENSG00000152443	ZNF776	230.547	0.0114782	7.97873	0.00473302	0.091225
ENSG00000104213	PDGFRL	447.947	-0.0401291	7.97781	0.00473543	0.091225
ENSG00000124145	SDC4	5526.05	-0.0153254	7.97189	0.00475094	0.0914018
ENSG00000111799	COL12A1	67955.6	0.031659	7.95406	0.00479796	0.0921834
ENSG00000106089	STX1A	369.897	-0.0194433	7.94356	0.00482587	0.0925964
ENSG00000248626	GAPDHP40	10.1832	-0.0263603	7.94287	0.00482771	NA
ENSG00000183808	RBM12B	310.827	0.0112359	7.93903	0.00483798	0.0926406
ENSG00000132256	TRIM5	1087.34	0.013481	7.93789	0.00484102	0.0926406
ENSG00000257621	PSMA3-AS1	539.221	0.0133716	7.9354	0.0048477	0.0926456
ENSG00000187123	LYPD6	469.587	0.0265469	7.92698	0.00487029	0.0929542
ENSG00000165060	FXN	216.253	-0.0101224	7.9183	0.00489373	0.0930727
ENSG00000196275	GTF2IRD2	210.217	0.0169468	7.91439	0.00490431	0.0930727
ENSG00000264067		45.2376	-0.0753881	7.91397	0.00490546	0.0930727
ENSG00000165949	IFI27	183.988	-0.0850257	7.91356	0.00490657	0.0930727
ENSG00000175505	CLCF1	354.469	-0.0216812	7.91275	0.00490875	0.0930727
ENSG00000176406	RIMS2	104.087	0.0346875	7.89964	0.00494447	0.0935514
ENSG00000122042	UBL3	1038.81	0.015342	7.89796	0.00494905	0.0935514
ENSG00000101191	DIDO1	2046.54	0.0079081	7.89449	0.00495856	0.0935514
ENSG00000132405	TBC1D14	1143.04	0.00667135	7.89276	0.0049633	0.0935514
ENSG00000189190	ZNF600	134.977	-0.0207851	7.89163	0.00496642	0.0935514
ENSG00000112699	GMDS	361.264	-0.0106223	7.8823	0.0049921	0.0939127
ENSG00000103365	GGA2	1182.83	0.00962802	7.87368	0.00501594	0.0939956
ENSG00000148834	GSTO1	2794.2	-0.0123035	7.87315	0.00501741	0.0939956
ENSG00000196262	PPIA	24787.4	-0.00989942	7.86922	0.00502833	0.0939956
ENSG00000178075	GRAMD1C	48.4826	-0.0233508	7.86908	0.00502873	0.0939956
ENSG00000164975	SNAPC3	975.224	-0.00910175	7.86895	0.00502908	0.0939956
ENSG00000100417	PMM1	873.515	-0.01058	7.866	0.0050373	0.0940275
ENSG00000080546	SESN1	445.201	0.0162574	7.86047	0.00505274	0.0940765
ENSG00000186577	SMIM29	911.288	-0.0123105	7.85888	0.00505718	0.0940765
ENSG00000128487	SPECC1	2079.96	0.0195295	7.85805	0.00505949	0.0940765
ENSG00000124920	MYRF	6255.96	0.0245488	7.85099	0.0050793	0.0941511
ENSG00000172292	CERS6	702.296	0.0145074	7.84859	0.00508604	0.0941511
ENSG00000242372	EIF6	3071.58	-0.00927917	7.84812	0.00508737	0.0941511
ENSG00000198833	UBE2J1	2699.02	0.0112371	7.84633	0.0050924	0.0941511
ENSG00000103647	CORO2B	493.453	-0.0304099	7.84501	0.00509613	0.0941511
ENSG00000197467	COL13A1	660.763	-0.035921	7.83516	0.00512397	0.0945444
ENSG00000100764	PSMC1	2880.28	-0.008274	7.83011	0.00513831	0.0946879
ENSG00000219200	RNASEK	6173.48	-0.011395	7.82556	0.00515124	0.0947217
ENSG00000254986	DPP3	1896.75	-0.00796564	7.8226	0.00515969	0.0947217
ENSG00000172927	MYEOV	21.2546	-0.0382421	7.81959	0.00516828	0.0947217
ENSG00000155324	GRAMD2B	935.778	0.0203954	7.81932	0.00516906	0.0947217
ENSG00000130429	ARPC1B	9095.68	-0.00837754	7.81644	0.00517731	0.0947217
ENSG00000171530	TBCA	2356.47	-0.00958201	7.81333	0.00518622	0.0947217
ENSG00000197622	CDC42SE1	2133.05	0.0103992	7.81016	0.00519534	0.0947217
ENSG00000124193	SRSF6	3150.95	0.00772585	7.8093	0.00519781	0.0947217
ENSG00000183486	MX2	333.582	-0.0473066	7.80584	0.00520778	0.0947217
ENSG00000063046	EIF4B	11220.6	0.0128975	7.80549	0.00520877	0.0947217
ENSG00000153560	UBP1	2752.13	0.0126911	7.80313	0.00521557	0.0947217
ENSG00000117139	KDM5B	2313.11	0.00885476	7.7995	0.00522607	0.0947217
ENSG00000155974	GRIP1	125.739	0.0195569	7.79922	0.00522689	0.0947217
ENSG00000116096	SPR	609.581	-0.0116864	7.79743	0.00523205	0.0947217
ENSG00000135924	DNAJB2	1624.16	-0.01015	7.79124	0.00525	0.0949277
ENSG00000182195	LDOC1	2219	-0.0137199	7.78484	0.00526864	0.0951347
ENSG00000128606	LRRC17	1420.06	-0.0483774	7.77924	0.005285	0.0951347
ENSG00000166532	RIMKLB	503.924	0.0166227	7.77902	0.00528566	0.0951347
ENSG00000100097	LGALS1	30723.3	-0.0134951	7.77828	0.00528783	0.0951347
ENSG00000164182	NDUFAF2	695.549	-0.0105572	7.77081	0.00530974	0.0954099
ENSG00000026652	AGPAT4	379.737	0.0125652	7.7681	0.00531769	0.095434
ENSG00000148384	INPP5E	594.936	-0.012094	7.76279	0.00533334	0.0955961
ENSG00000142168	SOD1	3153.78	-0.00940593	7.75802	0.00534745	0.09573
ENSG00000050628	PTGER3	20.6437	-0.0606911	7.74967	0.00537224	0.0960546
ENSG00000107779	BMPR1A	867.156	0.00950016	7.74571	0.00538402	0.0961461
ENSG00000163531	NFASC	116.682	-0.0818861	7.74181	0.00539566	0.0962349
ENSG00000121931	LRIF1	448.483	-0.0120072	7.72914	0.00543365	0.0967928
ENSG00000185033	SEMA4B	1003.86	-0.0126422	7.72457	0.00544744	0.0968592
ENSG00000053747	LAMA3	280.313	-0.0397092	7.72248	0.00545375	0.0968592
ENSG00000110675	ELMOD1	27.1482	-0.0433105	7.72041	0.00545999	0.0968592
ENSG00000174099	MSRB3	3944.88	0.0106932	7.71901	0.00546423	0.0968592
ENSG00000113389	NPR3	25.302	-0.0603788	7.70913	0.00549422	0.0972713
ENSG00000181381	DDX60L	359.949	-0.0269912	7.70651	0.00550219	0.097293
ENSG00000152256	PDK1	300.442	-0.0162695	7.70125	0.00551825	0.0974048
ENSG00000166145	SPINT1	46.8602	-0.042699	7.70002	0.00552201	0.0974048
ENSG00000110721	CHKA	524.501	0.0154057	7.69521	0.00553677	0.0975458
ENSG00000130770	ATP5IF1	2047.69	-0.00946151	7.68069	0.00558148	0.0982137
ENSG00000137491	SLCO2B1	22.8074	-0.073912	7.67183	0.00560895	0.0984642
ENSG00000123992	DNPEP	819.909	-0.00975845	7.66941	0.00561648	0.0984642
ENSG00000161677	JOSD2	822.639	-0.00967826	7.66781	0.00562146	0.0984642
ENSG00000196227	FAM217B	238.947	0.0139023	7.66731	0.00562302	0.0984642
ENSG00000183258	DDX41	1298.63	-0.00752905	7.66141	0.00564144	0.0984985
ENSG00000174775	HRAS	1069.58	-0.0118029	7.65996	0.00564596	0.0984985
ENSG00000196656		3675.47	-0.0203128	7.65673	0.00565608	0.0984985
ENSG00000275700	AATF	1085.31	-0.00930413	7.65644	0.00565702	0.0984985
ENSG00000164251	F2RL1	191.92	-0.0486449	7.65416	0.00566415	0.0984985
ENSG00000112182	BACH2	106.658	0.034799	7.64863	0.00568153	0.0984985
ENSG00000123843	C4BPB	50.387	0.0509575	7.64792	0.00568378	0.0984985
ENSG00000148484	RSU1	3951.63	-0.00865153	7.64746	0.00568522	0.0984985
ENSG00000254788	CKLF-CMTM1	20.889	0.0240871	7.64709	0.00568641	0.0984985
ENSG00000171103	TRMT61B	173.61	0.0107209	7.63606	0.00572127	0.0987505
ENSG00000126070	AGO3	670.973	0.00935855	7.63507	0.00572441	0.0987505
ENSG00000067048	DDX3Y	680.538	0.0235398	7.63305	0.00573083	0.0987505
ENSG00000110900	TSPAN11	20.6855	0.0588623	7.63301	0.00573097	0.0987505
ENSG00000277791	PSMB3	1641.31	-0.010858	7.63168	0.00573518	0.0987505
ENSG00000138646	HERC5	24.8599	-0.0456511	7.62875	0.00574451	0.0987546
ENSG00000115415	STAT1	4756.89	-0.028299	7.62731	0.00574911	0.0987546
ENSG00000124702	KLHDC3	1651.07	0.00964538	7.62272	0.00576375	0.0988885
ENSG00000189409	MMP23B	282.842	0.0205346	7.61997	0.00577253	0.0989215
ENSG00000265393		9.98644	0.0306392	7.61749	0.0057805	NA
ENSG00000267309	ZNF566-AS1	29.8225	0.0195874	7.59947	0.00583856	0.0997314
ENSG00000034677	RNF19A	743.351	0.0102757	7.59893	0.00584028	0.0997314
ENSG00000067560	RHOA	12814.9	-0.00819126	7.59679	0.00584724	0.0997314
ENSG00000157168	NRG1	842.788	-0.0351281	7.59511	0.00585268	0.0997314
ENSG00000105146	AURKC	10.8437	-0.0332841	7.5942	0.00585564	NA
ENSG00000171757	LRRC34	15.2235	-0.0293795	7.5934	0.00585824	NA
ENSG00000164938	TP53INP1	862.498	0.0244404	7.59175	0.0058636	0.0997314
ENSG00000111726	CMAS	674.242	-0.00861041	7.59057	0.00586743	0.0997314
ENSG00000130810	PPAN	770.449	-0.0118677	7.59034	0.00586818	0.0997314
ENSG00000144848	ATG3	1222.58	-0.00765295	7.56478	0.005952	0.100856
ENSG00000156030	MIDEAS	1117.02	0.00975643	7.56286	0.00595834	0.100856
ENSG00000120899	PTK2B	937.711	0.0189687	7.56181	0.0059618	0.100856
ENSG00000114770	ABCC5	1526.77	0.0171186	7.56165	0.00596234	0.100856
ENSG00000157985	AGAP1	995.131	0.0137317	7.5539	0.00598802	0.100938
ENSG00000072422	RHOBTB1	510.802	0.0164045	7.55348	0.00598943	0.100938
ENSG00000186594	MIR22HG	2251.75	0.0125595	7.55326	0.00599015	0.100938
ENSG00000267855	NDUFA7	806.727	-0.0103277	7.55021	0.00600031	0.100938
ENSG00000100650	SRSF5	3567.62	0.00838109	7.54966	0.00600213	0.100938
ENSG00000256618		2908.58	-0.0179806	7.54208	0.00602745	0.101246
ENSG00000172795	DCP2	275.095	0.016072	7.53908	0.0060375	0.101297
ENSG00000277702		11.7562	-0.0333715	7.53908	0.0060375	NA
ENSG00000196502	SULT1A1	49.4282	-0.045718	7.52784	0.00607527	0.101812
ENSG00000141258	SGSM2	1369.84	0.00928134	7.52442	0.00608682	0.101887
ENSG00000240972	MIF	9116.23	-0.0113832	7.52029	0.00610077	0.102002
ENSG00000146802	TMEM168	376.582	0.0117223	7.51225	0.00612808	0.10234
ENSG00000018869	ZNF582	39.3786	0.0212319	7.50818	0.00614194	0.102341
ENSG00000173349	SFT2D3	195.428	0.0109936	7.50624	0.00614855	0.102341
ENSG00000167995	BEST1	845.611	-0.0261754	7.506	0.00614938	0.102341
ENSG00000132718	SYT11	1149.35	-0.0172032	7.50313	0.00615918	0.102386
ENSG00000130706	ADRM1	3686.18	-0.00843326	7.49857	0.00617481	0.102527
ENSG00000171161	ZNF672	559.414	0.0089887	7.49263	0.00619519	0.102742
ENSG00000153551	CMTM7	354.684	-0.0139413	7.49066	0.00620199	0.102742
ENSG00000131188	PRR7	300.521	-0.0164503	7.48069	0.00623643	0.103135
ENSG00000114315	HES1	326.517	0.0429934	7.47689	0.00624959	0.103135
ENSG00000148832	PAOX	115.219	-0.0132737	7.47618	0.00625207	0.103135
ENSG00000163320	CGGBP1	1329.9	0.0107044	7.4753	0.00625513	0.103135
ENSG00000126756	UXT	669.825	-0.00832525	7.47348	0.00626145	0.103135
ENSG00000167862	MRPL58	421.657	-0.0125049	7.47044	0.00627201	0.103191
ENSG00000173473	SMARCC1	2683.37	0.0104438	7.46754	0.00628213	0.10324
ENSG00000184785	SMIM10	235.687	-0.0200769	7.4612	0.00630431	0.103426
ENSG00000174136	RGMB	2768.08	-0.0277381	7.4602	0.00630778	0.103426
ENSG00000100294	MCAT	315.942	-0.00759448	7.45482	0.0063267	0.103618
ENSG00000203772	SPRN	64.227	-0.0429613	7.44925	0.00634629	0.103706
ENSG00000087365	SF3B2	5839.91	-0.00736441	7.44922	0.0063464	0.103706
ENSG00000176928	GCNT4	34.6179	-0.0373254	7.44238	0.00637057	0.103874
ENSG00000198887	SMC5	840.982	0.0105135	7.44223	0.00637111	0.103874
ENSG00000105185	PDCD5	1583.23	-0.0110981	7.43678	0.00639042	0.104031
ENSG00000151117	TMEM86A	66.0209	0.0241046	7.43545	0.00639514	0.104031
ENSG00000168056	LTBP3	9790.15	0.0146892	7.43023	0.0064137	0.104131
ENSG00000136381	IREB2	931.704	0.010061	7.42739	0.00642384	0.104131
ENSG00000171533	MAP6	112.792	-0.0308	7.42709	0.0064249	0.104131
ENSG00000188825	LINC00910	31.4399	-0.0345917	7.42225	0.00644221	0.104131
ENSG00000265401		159.304	-0.0283676	7.42129	0.00644567	0.104131
ENSG00000165233	CARD19	753.915	-0.0104473	7.42007	0.00645004	0.104131
ENSG00000134901	POGLUT2	850.942	0.0178853	7.41945	0.00645225	0.104131
ENSG00000181924	COA4	814.097	-0.00897516	7.41756	0.00645903	0.104131
ENSG00000105171	POP4	659.096	-0.00711577	7.40811	0.00649306	0.104235
ENSG00000260942	CAPN10-DT	41.7125	0.0222969	7.40747	0.00649536	0.104235
ENSG00000132424	PNISR	1615.9	0.0121174	7.40679	0.00649781	0.104235
ENSG00000204588	LINC01123	99.6083	0.0232257	7.40608	0.00650039	0.104235
ENSG00000048162	NOP16	537.971	-0.0124132	7.40575	0.00650157	0.104235
ENSG00000134278	SPIRE1	1173.64	-0.014109	7.40244	0.00651354	0.104311
ENSG00000165152	PGAP4	236.132	-0.046285	7.39959	0.00652386	0.10436
ENSG00000174384	PMS2P6	65.0226	-0.0170208	7.39557	0.00653848	0.104478
ENSG00000214900	LINC01588	22.8122	-0.0266947	7.38954	0.00656041	0.104713
ENSG00000099624	ATP5F1D	2331.83	-0.0102517	7.38141	0.00659015	0.105071
ENSG00000196358	NTNG2	255.993	-0.0233246	7.37559	0.00661153	0.105295
ENSG00000280755		118.07	-0.0441102	7.37222	0.00662393	0.105367
ENSG00000273004		10.3958	0.0386668	7.37185	0.00662529	NA
ENSG00000258791	LINC00520	14.698	-0.0686304	7.37055	0.00663007	NA
ENSG00000171970	ZNF57	45.9318	-0.0143861	7.3704	0.0066306	0.105367
ENSG00000112877	CEP72	36.5991	-0.0193336	7.36832	0.0066383	0.105373
ENSG00000124380	SNRNP27	615.065	-0.00894952	7.36594	0.00664709	0.105397
ENSG00000142684	ZNF593	476.68	-0.0125901	7.35937	0.00667142	0.105666
ENSG00000185561	TLCD2	589.399	0.0230923	7.34708	0.00671717	0.106136
ENSG00000167291	TBC1D16	2728.9	0.0101194	7.34581	0.00672193	0.106136
ENSG00000154065	ANKRD29	60.039	-0.0410307	7.34548	0.00672315	0.106136
ENSG00000107611	CUBN	69.5086	-0.0361222	7.3424	0.00673468	0.106154
ENSG00000183621	ZNF438	128.665	-0.0128841	7.34059	0.00674148	0.106154
ENSG00000247626	MARS2	156.295	0.010517	7.33929	0.00674636	0.106154
ENSG00000196700	ZNF512B	1423.47	0.00911629	7.33488	0.00676291	0.106299
ENSG00000091136	LAMB1	19890.9	0.0121053	7.32562	0.00679784	0.106731
ENSG00000137942	FNBP1L	619.852	0.0141013	7.32209	0.00681121	0.106796
ENSG00000117308	GALE	695.172	-0.0162609	7.32063	0.00681676	0.106796
ENSG00000184402	SS18L1	343.059	0.010719	7.31484	0.00683873	0.106937
ENSG00000159314	ARHGAP27	156.198	-0.0226732	7.31436	0.00684057	0.106937
ENSG00000136231	IGF2BP3	544.97	-0.0232438	7.30229	0.00688669	0.107541
ENSG00000138430	OLA1	1691.69	-0.0109805	7.29845	0.00690143	0.107655
ENSG00000133687	TMTC1	317.352	-0.0536531	7.29031	0.00693276	0.108027
ENSG00000165359	INTS6L	641.185	0.0244095	7.28416	0.00695652	0.10828
ENSG00000168556	ING2	198.089	-0.0112172	7.28039	0.00697112	0.10839
ENSG00000154582	ELOC	1256.5	-0.00710132	7.27766	0.00698175	0.108439
ENSG00000162738	VANGL2	281.588	0.0514543	7.26647	0.00702539	0.108889
ENSG00000107949	BCCIP	915.138	-0.0109747	7.26426	0.00703404	0.108889
ENSG00000006042	TMEM98	2355.79	0.0102568	7.26143	0.00704512	0.108889
ENSG00000116871	MAP7D1	8241.78	-0.00908725	7.2599	0.00705111	0.108889
ENSG00000024422	EHD2	16227.4	-0.0112947	7.25962	0.00705221	0.108889
ENSG00000137343	ATAT1	299.762	0.012914	7.25865	0.00705604	0.108889
ENSG00000155330	C16orf87	217.756	0.012845	7.25142	0.00708451	0.109107
ENSG00000034510	TMSB10	41350.9	-0.0157217	7.25122	0.00708529	0.109107
ENSG00000136630	HLX	447.152	-0.0268161	7.23816	0.00713702	0.1097
ENSG00000101220	C20orf27	1140.28	-0.013859	7.23766	0.00713898	0.1097
ENSG00000128284	APOL3	31.368	-0.0313192	7.23365	0.00715496	0.109829
ENSG00000110367	DDX6	3021.71	0.00887715	7.22645	0.00718369	0.109968
ENSG00000087586	AURKA	263.34	-0.0264804	7.22597	0.00718564	0.109968
ENSG00000243156	MICAL3	1650.62	0.0144961	7.22566	0.00718689	0.109968
ENSG00000105270	CLIP3	4590.34	-0.0131578	7.22045	0.00720778	0.110128
ENSG00000183580	FBXL7	925.106	0.0133957	7.21924	0.00721263	0.110128
ENSG00000158417	EIF5B	4863.95	-0.00929738	7.21522	0.0072288	0.110218
ENSG00000146859	TMEM140	88.304	-0.0451518	7.21305	0.00723755	0.110218
ENSG00000106086	PLEKHA8	365.819	0.0119648	7.21209	0.00724141	0.110218
ENSG00000132321	IQCA1	12.5074	0.0765102	7.21164	0.00724323	NA
ENSG00000198825	INPP5F	998.605	0.0178099	7.20453	0.00727197	0.110543
ENSG00000173914	RBM4B	400.025	0.00859099	7.20302	0.0072781	0.110543
ENSG00000175634	RPS6KB2	1472.98	-0.00825663	7.19667	0.00730391	0.110818
ENSG00000279822		19.3732	-0.0311366	7.18631	0.00734618	NA
ENSG00000173517	PEAK1	4634.84	0.0145772	7.18344	0.00735794	0.111521
ENSG00000196878	LAMB3	172.637	-0.0426509	7.17939	0.00737459	0.111656
ENSG00000172466	ZNF24	874.437	0.00881704	7.17406	0.00739652	0.111796
ENSG00000108424	KPNB1	10909.1	-0.00680691	7.17337	0.00739936	0.111796
ENSG00000198171	DDRGK1	1325.8	-0.0126303	7.16754	0.00742346	0.111854
ENSG00000143324	XPR1	1193.32	0.0121072	7.16644	0.007428	0.111854
ENSG00000169902	TPST1	2230.39	0.0185502	7.16545	0.0074321	0.111854
ENSG00000100591	AHSA1	2531.19	-0.00691283	7.16494	0.00743422	0.111854
ENSG00000137275	RIPK1	1323.15	0.0100034	7.16243	0.00744462	0.111894
ENSG00000266340		156.321	0.0145535	7.15796	0.0074632	0.111984
ENSG00000105700	KXD1	2431.75	-0.00647807	7.15726	0.00746613	0.111984
ENSG00000177542	SLC25A22	846.948	-0.0147382	7.15387	0.00748026	0.11208
ENSG00000170961	HAS2	472.865	-0.0536943	7.1413	0.00753284	0.11275
ENSG00000166387	PPFIBP2	432.582	0.0243506	7.13638	0.00755354	0.112943
ENSG00000143761	ARF1	10994.3	-0.00603579	7.13451	0.00756143	0.112944
ENSG00000243678	NME2	10223.5	-0.00830367	7.12906	0.00758443	0.11317
ENSG00000204673	AKT1S1	4395.91	-0.00828003	7.12392	0.00760623	0.113324
ENSG00000103507	BCKDK	1513.01	-0.008267	7.12292	0.00761046	0.113324
ENSG00000159579	RSPRY1	1374	0.00949278	7.11994	0.00762313	0.113336
ENSG00000165185	KIAA1958	36.6273	0.0208213	7.11286	0.0076533	0.113336
ENSG00000248415	GAPDHP61	20.0852	-0.0219769	7.11275	0.00765377	NA
ENSG00000171469	ZNF561	724.653	0.0162602	7.11251	0.00765477	0.113336
ENSG00000145416	MARCHF1	11.5132	-0.0400481	7.11249	0.00765486	NA
ENSG00000180340	FZD2	2038.69	0.0189382	7.11221	0.00765606	0.113336
ENSG00000274749	KRTAP7-1	21.9971	-0.0603539	7.10989	0.00766599	0.113336
ENSG00000026025	VIM	182386	-0.0135787	7.10988	0.00766603	0.113336
ENSG00000196757	ZNF700	191.087	0.0136835	7.10773	0.00767521	0.113336
ENSG00000011478	QPCTL	1059.02	-0.0153578	7.10592	0.00768298	0.113336
ENSG00000109381	ELF2	389.893	0.0107793	7.10513	0.00768635	0.113336
ENSG00000158864	NDUFS2	1981.61	-0.00687169	7.10261	0.00769718	0.113336
ENSG00000010072	SPRTN	252.989	0.00790335	7.10251	0.00769761	0.113336
ENSG00000272316		53.3865	0.0221662	7.09078	0.00774815	0.113918
ENSG00000162222	TTC9C	503.117	-0.00668952	7.08966	0.00775298	0.113918
ENSG00000164403	SHROOM1	288.57	-0.0160463	7.08296	0.00778206	0.114229
ENSG00000177842	ZNF620	15.2161	0.0230407	7.07714	0.00780733	NA
ENSG00000221909	FAM200A	117.458	0.0117766	7.06637	0.00785441	0.115174
ENSG00000204356	NELFE	1512.88	-0.00823631	7.06037	0.00788075	0.115443
ENSG00000277758	SYT15B	293.719	0.0538923	7.05448	0.00790673	0.115683
ENSG00000273301		22.0881	0.0940193	7.05186	0.0079183	0.115683
ENSG00000113300	CNOT6	446.684	0.0122692	7.05121	0.00792118	0.115683
ENSG00000087253	LPCAT2	1066.29	0.0174516	7.0394	0.00797359	0.116105
ENSG00000100258	LMF2	4948.4	-0.0120704	7.03937	0.00797369	0.116105
ENSG00000126698	DNAJC8	2583.03	-0.00677593	7.0392	0.00797446	0.116105
ENSG00000072958	AP1M1	1869.17	-0.00663367	7.03745	0.00798227	0.116105
ENSG00000249087	ZNF436-AS1	25.0728	0.025472	7.02971	0.00801683	0.11649
ENSG00000147124	ZNF41	222.865	0.00970166	7.02376	0.00804354	0.116761
ENSG00000133985	TTC9	12.7419	0.0676591	7.02051	0.00805814	NA
ENSG00000107201	DDX58	346.762	-0.0269186	7.01205	0.0080963	0.117201
ENSG00000147202	DIAPH2	445.381	-0.0137118	7.01181	0.00809739	0.117201
ENSG00000135624	CCT7	6350.53	-0.00778971	7.01161	0.00809826	0.117201
ENSG00000187792	ZNF70	314.606	0.0114184	6.99815	0.0081594	0.117769
ENSG00000111335	OAS2	88.7077	-0.0936524	6.99746	0.00816252	0.117769
ENSG00000124243	BCAS4	413.048	-0.0102133	6.99409	0.00817794	0.117769
ENSG00000261652	PIERCE2	33.6856	-0.02679	6.99372	0.0081796	0.117769
ENSG00000185122	HSF1	2980.03	-0.00705802	6.99348	0.00818074	0.117769
ENSG00000163093	BBS5	355.718	-0.0109316	6.99208	0.00818711	0.117769
ENSG00000067829	IDH3G	1437.15	-0.00743559	6.99045	0.0081946	0.117769
ENSG00000235316	DUSP8P5	54.5247	0.0198664	6.98126	0.00823675	0.118062
ENSG00000171813	PWWP2B	579.844	-0.0127642	6.98108	0.00823758	0.118062
ENSG00000204362	LINC02783	104.176	0.0338265	6.97935	0.00824554	0.118062
ENSG00000185619	PCGF3	1545.96	0.00897378	6.97888	0.0082477	0.118062
ENSG00000113761	ZNF346	303.016	0.00731945	6.97475	0.00826677	0.118217
ENSG00000179051	RCC2	3352.93	0.0108843	6.97006	0.00828849	0.11841
ENSG00000186318	BACE1	3525.24	0.0112095	6.96345	0.00831912	0.118684
ENSG00000125872	LRRN4	18.4868	0.0595888	6.96199	0.00832592	NA
ENSG00000157557	ETS2	1625.26	-0.0199518	6.96083	0.00833133	0.118684
ENSG00000122873	CISD1	325.874	-0.00912629	6.95875	0.00834105	0.118684
ENSG00000172465	TCEAL1	252.549	0.0111875	6.95352	0.00836544	0.118684
ENSG00000047932	GOPC	1872.59	0.0134394	6.95351	0.00836551	0.118684
ENSG00000230417	LINC00595	24.5083	-0.0405313	6.95304	0.00836769	0.118684
ENSG00000151150	ANK3	100.137	0.0370706	6.95181	0.00837346	0.118684
ENSG00000124788	ATXN1	1003.44	0.0120146	6.95154	0.00837471	0.118684
ENSG00000161277	THAP8	192.835	-0.0130703	6.94896	0.00838681	0.118684
ENSG00000269226	TMSB15B	58.0944	0.0173234	6.94831	0.00838985	0.118684
ENSG00000110446	SLC15A3	203.308	-0.0319543	6.94433	0.00840851	0.118831
ENSG00000065978	YBX1	23155.7	-0.0109911	6.93721	0.00844205	0.119188
ENSG00000261061		78.0491	-0.0195773	6.93276	0.00846312	0.119333
ENSG00000183496	MEX3B	708.103	0.0340209	6.92695	0.00849062	0.119333
ENSG00000122033	MTIF3	589.39	-0.00705182	6.92526	0.00849867	0.119333
ENSG00000101574	METTL4	139.347	0.0126025	6.92496	0.00850009	0.119333
ENSG00000197329	PELI1	158.118	0.0150926	6.92491	0.0085003	0.119333
ENSG00000236824	BCYRN1	1232.83	-0.0345324	6.92458	0.0085019	0.119333
ENSG00000018236	CNTN1	299.232	0.0366558	6.92183	0.008515	0.119377
ENSG00000144645	OSBPL10	1131.69	0.0182714	6.92043	0.00852164	0.119377
ENSG00000112242	E2F3	780.043	0.00659254	6.91229	0.00856051	0.119452
ENSG00000112335	SNX3	3899.54	-0.00716911	6.91014	0.00857081	0.119452
ENSG00000188976	NOC2L	3177.69	-0.00917475	6.9098	0.00857244	0.119452
ENSG00000187608	ISG15	1267.1	-0.0350363	6.90939	0.00857445	0.119452
ENSG00000154188	ANGPT1	339.886	-0.0306229	6.90498	0.0085956	0.119452
ENSG00000158402	CDC25C	30.2379	-0.0460244	6.90421	0.00859931	0.119452
ENSG00000161021	MAML1	973.457	0.0104986	6.90339	0.00860325	0.119452
ENSG00000225648	SBDSP1	630.512	-0.0107179	6.90331	0.00860365	0.119452
ENSG00000213221	DNLZ	268.558	-0.018784	6.90185	0.00861065	0.119452
ENSG00000178917	ZNF852	29.1495	0.0195152	6.90155	0.0086121	0.119452
ENSG00000127483	HP1BP3	3251.43	0.00707221	6.90032	0.00861802	0.119452
ENSG00000110880	CORO1C	8460.1	-0.00677673	6.89619	0.00863796	0.119613
ENSG00000124766	SOX4	1188.36	0.0238824	6.89322	0.00865234	0.119653
ENSG00000196628	TCF4	1053.88	0.0226694	6.89217	0.00865743	0.119653
ENSG00000273680		11.3218	0.0272957	6.88753	0.00867993	NA
ENSG00000166165	CKB	268.321	-0.0442206	6.88681	0.00868339	0.119775
ENSG00000270504		594.539	0.0167291	6.88371	0.00869848	0.119775
ENSG00000196199	MPHOSPH8	1134.55	0.00615959	6.88317	0.00870114	0.119775
ENSG00000123416	TUBA1B	18647.6	-0.0235771	6.88311	0.00870139	0.119775
ENSG00000124225	PMEPA1	1144.7	0.0263015	6.88181	0.00870774	0.119775
ENSG00000163932	PRKCD	695.587	-0.0131647	6.87846	0.00872408	0.119851
ENSG00000125505	MBOAT7	6596.69	-0.0111904	6.87728	0.00872984	0.119851
ENSG00000007520	TSR3	1526.13	-0.00863617	6.87508	0.0087406	0.119884
ENSG00000106366	SERPINE1	180399	-0.0205666	6.87102	0.00876048	0.11997
ENSG00000131845	ZNF304	224.312	0.00948262	6.87041	0.00876347	0.11997
ENSG00000105669	COPE	4299.86	-0.00802538	6.86616	0.00878433	0.120141
ENSG00000114405	C3orf14	114.037	-0.0148151	6.86111	0.00880917	0.120367
ENSG00000254505	CHMP4A	572.783	-0.00941654	6.85643	0.00883228	0.120569
ENSG00000188906	LRRK2	37.3358	-0.028956	6.84989	0.00886466	0.120885
ENSG00000099250	NRP1	7431.04	-0.0181007	6.84798	0.00887415	0.120885
ENSG00000249700	SRD5A3-AS1	17.3234	0.0233904	6.84434	0.00889227	NA
ENSG00000111145	ELK3	1661.46	0.0130936	6.84418	0.00889307	0.120885
ENSG00000077150	NFKB2	1841.05	-0.013391	6.84408	0.00889352	0.120885
ENSG00000134779	TPGS2	2662.88	-0.00869491	6.84331	0.00889739	0.120885
ENSG00000169252	ADRB2	20.3014	-0.0402215	6.84154	0.00890621	NA
ENSG00000108010	GLRX3	1161.23	-0.00817999	6.83738	0.00892695	0.121106
ENSG00000181031	RPH3AL	52.9128	-0.0285763	6.8367	0.00893038	0.121106
ENSG00000237238	BMS1P10	25.418	-0.0225837	6.82456	0.00899125	0.121712
ENSG00000179262	RAD23A	2953.66	-0.0117808	6.82443	0.00899195	0.121712
ENSG00000082497	SERTAD4	226.441	0.03454	6.82106	0.0090089	0.121827
ENSG00000205041		14.2405	0.0299256	6.81916	0.0090185	NA
ENSG00000185305	ARL15	208.932	0.0151779	6.81618	0.00903354	0.122046
ENSG00000120217	CD274	106.234	-0.043963	6.81386	0.00904532	0.122063
ENSG00000146701	MDH2	6105.62	-0.007463	6.8126	0.0090517	0.122063
ENSG00000261428		11.7813	0.0270204	6.80978	0.009066	NA
ENSG00000228057	SEC63P1	37.8545	-0.0136648	6.80913	0.00906931	0.122114
ENSG00000254535	PABPC4L	217.061	0.0413677	6.80851	0.00907246	0.122114
ENSG00000276289		17.8914	0.0542015	6.80451	0.00909278	NA
ENSG00000137547	MRPL15	591.887	-0.0103041	6.80434	0.00909365	0.122217
ENSG00000113140	SPARC	202373	0.0184235	6.80357	0.00909757	0.122217
ENSG00000070614	NDST1	12150.1	0.0160362	6.79823	0.00912485	0.122217
ENSG00000110756	HPS5	809.872	0.014388	6.79749	0.00912859	0.122217
ENSG00000197043	ANXA6	15013.9	-0.0104847	6.79681	0.00913207	0.122217
ENSG00000060491	OGFR	1780.26	-0.00991342	6.79107	0.0091615	0.122217
ENSG00000131711	MAP1B	15048.5	-0.0163804	6.79095	0.00916209	0.122217
ENSG00000189266	PNRC2	1111.88	0.00970975	6.78941	0.00917002	0.122217
ENSG00000004864	SLC25A13	447.049	0.0111427	6.78801	0.00917721	0.122217
ENSG00000263001	GTF2I	3937.64	0.0106113	6.78496	0.00919292	0.122217
ENSG00000145220	LYAR	339.27	-0.0131422	6.78456	0.00919497	0.122217
ENSG00000147118	ZNF182	131.636	0.00949687	6.78315	0.00920224	0.122217
ENSG00000213096	ZNF254	140.809	0.0140211	6.78249	0.00920565	0.122217
ENSG00000176371	ZSCAN2	195.477	0.0119321	6.78203	0.009208	0.122217
ENSG00000131462	TUBG1	1398.53	-0.0118238	6.78194	0.00920846	0.122217
ENSG00000129235	TXNDC17	734.496	-0.010025	6.78056	0.0092156	0.122217
ENSG00000122678	POLM	343.479	0.0144499	6.77374	0.0092509	0.122503
ENSG00000144655	CSRNP1	864.502	0.0160065	6.77079	0.00926618	0.122503
ENSG00000082212	ME2	1069.77	-0.0111264	6.77016	0.00926947	0.122503
ENSG00000108953	YWHAE	10812.7	-0.00851917	6.76675	0.00928719	0.122503
ENSG00000196417	ZNF765	147.814	0.0107479	6.76674	0.00928721	0.122503
ENSG00000137965	IFI44	171.294	-0.0441079	6.76657	0.00928809	0.122503
ENSG00000163755	HPS3	564.943	-0.0128796	6.75975	0.00932367	0.122821
ENSG00000116497	S100PBP	570.931	0.00746311	6.75799	0.00933289	0.122821
ENSG00000076321	KLHL20	461.238	0.00834302	6.75581	0.00934431	0.122821
ENSG00000140382	HMG20A	768.814	0.0106067	6.75543	0.00934629	0.122821
ENSG00000130520	LSM4	1684.43	-0.00992791	6.75059	0.00937164	0.122984
ENSG00000174839	DENND6A	256.841	0.00933959	6.74981	0.00937576	0.122984
ENSG00000168300	PCMTD1	496.48	0.0148383	6.74012	0.00942685	0.123542
ENSG00000197238	H4C11	17.6128	-0.0279747	6.73778	0.00943922	NA
ENSG00000143341	HMCN1	2864.21	0.0295486	6.73394	0.00945952	0.123731
ENSG00000204923	FBXO48	58.9739	-0.0140053	6.73316	0.00946365	0.123731
ENSG00000152767	FARP1	5614.51	0.0131192	6.73253	0.009467	0.123731
ENSG00000168038	ULK4	72.1439	-0.0272177	6.72711	0.00949582	0.123777
ENSG00000136167	LCP1	235.875	-0.0505381	6.72591	0.00950224	0.123777
ENSG00000130304	SLC27A1	627.921	-0.0146501	6.72554	0.00950417	0.123777
ENSG00000166278	C2	18.1782	0.042594	6.72356	0.00951477	NA
ENSG00000085840	ORC1	46.5992	-0.0372917	6.7226	0.00951985	0.123777
ENSG00000082014	SMARCD3	1277.05	0.0117817	6.72209	0.00952261	0.123777
ENSG00000272341		41.1742	0.0199219	6.72201	0.00952302	0.123777
ENSG00000065923	SLC9A7	1784.52	-0.0221186	6.72061	0.00953052	0.123777
ENSG00000076864	RAP1GAP	22.4121	-0.0446089	6.71888	0.00953977	0.123785
ENSG00000120696	KBTBD7	98.6704	0.017924	6.71518	0.00955958	0.123918
ENSG00000138495	COX17	433.143	-0.0126453	6.71376	0.0095672	0.123918
ENSG00000005243	COPZ2	1408.8	-0.014654	6.7072	0.00960246	0.124264
ENSG00000033050	ABCF2	2304.52	-0.00574959	6.7011	0.00963535	0.124577
ENSG00000178033	CALHM5	607.284	0.0152747	6.69662	0.00965959	0.124779
ENSG00000093167	LRRFIP2	1266.68	-0.0087291	6.69469	0.00967007	0.124803
ENSG00000054965	FAM168A	1283.87	0.00780582	6.6889	0.00970151	0.125097
ENSG00000186063	AIDA	1903.9	-0.00860027	6.68639	0.0097152	0.125161
ENSG00000183597	TANGO2	838.165	-0.00910211	6.68478	0.00972396	0.125162
ENSG00000171488	LRRC8C	282.254	-0.0201143	6.67829	0.00975941	0.125507
ENSG00000141449	GREB1L	111.641	0.0341851	6.67625	0.0097706	0.125539
ENSG00000129990	SYT5	12.972	-0.0362596	6.67083	0.00980036	NA
ENSG00000198794	SCAMP5	209.569	0.0460012	6.66735	0.00981949	0.126055
ENSG00000101665	SMAD7	1294.35	0.0192793	6.65874	0.00986704	0.126552
ENSG00000179912	R3HDM2	1334.5	0.00751389	6.65284	0.00989982	0.126793
ENSG00000135047	CTSL	5163.51	-0.0164342	6.6522	0.00990335	0.126793
ENSG00000115457	IGFBP2	393.547	-0.0823165	6.64738	0.00993017	0.127023
ENSG00000104979	C19orf53	1929.6	-0.00892309	6.64508	0.009943	0.127068
ENSG00000109323	MANBA	6037.67	0.0242541	6.64361	0.00995123	0.127068
ENSG00000138107	ACTR1A	4541.17	-0.00509003	6.63972	0.00997295	0.127232
ENSG00000242259	C22orf39	337.456	0.00845489	6.63308	0.0100102	0.127586
ENSG00000197506	SLC28A3	39.64	-0.0243624	6.63163	0.0100184	0.127586
ENSG00000151136	ABTB3	767.795	0.0256169	6.62578	0.0100513	0.127764
ENSG00000115289	PCGF1	238.949	-0.00780153	6.62539	0.0100535	0.127764
ENSG00000162636	FAM102B	153.16	0.017032	6.62246	0.01007	0.127764
ENSG00000203819		11.3618	0.0628417	6.62185	0.0100735	NA
ENSG00000163349	HIPK1	1008	0.0108738	6.62161	0.0100749	0.127764
ENSG00000105835	NAMPT	2002.68	-0.0297815	6.62131	0.0100766	0.127764
ENSG00000101935	AMMECR1	363.44	0.0116144	6.61366	0.01012	0.128201
ENSG00000267577	DNAAF3-AS1	20.2192	-0.0395408	6.60518	0.0101682	NA
ENSG00000182541	LIMK2	2330.87	0.0220851	6.60482	0.0101703	0.128726
ENSG00000274333		188.964	0.0388043	6.60263	0.0101829	0.128772
ENSG00000230454		25.3108	0.0215494	6.60076	0.0101935	0.128794
ENSG00000099821	POLRMT	1190.02	-0.00813154	6.59737	0.0102129	0.128872
ENSG00000064995	TAF11	439.472	0.00744474	6.59656	0.0102176	0.128872
ENSG00000147162	OGT	3425.78	0.0132652	6.58986	0.0102561	0.129243
ENSG00000225377	NRSN2-AS1	37.2596	-0.0154607	6.58699	0.0102727	0.129243
ENSG00000111331	OAS3	388.149	-0.0490008	6.58679	0.0102739	0.129243
ENSG00000198556	ZNF789	205.432	0.016726	6.58487	0.0102849	0.129269
ENSG00000164674	SYTL3	51.2169	-0.022918	6.5782	0.0103235	0.129513
ENSG00000109519	GRPEL1	803.239	-0.00787267	6.57472	0.0103437	0.129513
ENSG00000182841	RRP7BP	194.795	0.0170297	6.57331	0.0103519	0.129513
ENSG00000169627	BOLA2B	369.843	-0.0126732	6.57273	0.0103553	0.129513
ENSG00000070778	PTPN21	1024.67	0.0100426	6.57247	0.0103568	0.129513
ENSG00000134548	SPX	50.5514	-0.0402615	6.57224	0.0103582	0.129513
ENSG00000163293	NIPAL1	70.6066	0.0272722	6.57064	0.0103675	0.129517
ENSG00000268894	PLCE1-AS1	208.747	0.0336465	6.56879	0.0103783	0.12954
ENSG00000069248	NUP133	821.185	0.00575241	6.56384	0.0104071	0.129695
ENSG00000205323	SARNP	1010.21	-0.00879311	6.56358	0.0104087	0.129695
ENSG00000234964	FABP5P7	195.845	-0.0239209	6.55929	0.0104338	0.129896
ENSG00000197879	MYO1C	12670	-0.00759649	6.54939	0.010492	0.130496
ENSG00000205220	PSMB10	468.614	-0.011529	6.5478	0.0105014	0.130496
ENSG00000149547	EI24	2753.89	0.00690882	6.5456	0.0105144	0.130496
ENSG00000239969		29.6813	-0.0250574	6.54496	0.0105182	0.130496
ENSG00000158186	MRAS	1616.62	0.0100427	6.54297	0.0105299	0.130529
ENSG00000173221	GLRX	1963.61	-0.0235829	6.5384	0.010557	0.1307
ENSG00000168938	PPIC	1951.79	0.0145349	6.53686	0.0105662	0.1307
ENSG00000057294	PKP2	1689.02	0.0221603	6.53607	0.0105709	0.1307
ENSG00000067533	RRP15	518.635	-0.00955688	6.53072	0.0106027	0.130981
ENSG00000178764	ZHX2	346.214	0.0140364	6.52698	0.010625	0.131099
ENSG00000126804	ZBTB1	772.906	0.010122	6.52608	0.0106304	0.131099
ENSG00000088970	KIZ	313.258	0.00881503	6.52317	0.0106478	0.131202
ENSG00000118804	STBD1	265.183	-0.0154823	6.52087	0.0106616	0.13126
ENSG00000185158	LRRC37B	174.407	-0.0120622	6.5193	0.010671	0.131264
ENSG00000163536	SERPINI1	157.272	-0.0241022	6.51727	0.0106832	0.131281
ENSG00000143476	DTL	73.7362	-0.0404538	6.51603	0.0106906	0.131281
ENSG00000140598	EFL1	565.763	-0.0114967	6.51131	0.0107191	0.131518
ENSG00000117036	ETV3	525.895	0.00848682	6.50471	0.0107589	0.131891
ENSG00000267673	FDX2	449.836	-0.00881298	6.49999	0.0107875	0.131891
ENSG00000179820	MYADM	11352.3	-0.0142126	6.49955	0.0107902	0.131891
ENSG00000184347	SLIT3	10025.5	0.0288698	6.49934	0.0107914	0.131891
ENSG00000139289	PHLDA1	3786.83	-0.0300326	6.49774	0.0108011	0.131891
ENSG00000172554	SNTG2	25.1897	0.0339591	6.49607	0.0108113	0.131891
ENSG00000187957	DNER	26.5681	-0.0453051	6.49573	0.0108134	0.131891
ENSG00000164056	SPRY1	106.768	0.0357353	6.49009	0.0108477	0.132197
ENSG00000110429	FBXO3	336.542	0.00910717	6.48846	0.0108577	0.132208
ENSG00000106976	DNM1	588.468	0.0211446	6.48292	0.0108916	0.132432
ENSG00000081791	DELE1	1099.68	0.00597817	6.48244	0.0108945	0.132432
ENSG00000188211	NCR3LG1	383.451	0.0200289	6.47344	0.0109498	0.132992
ENSG00000102393	GLA	749.4	-0.0186791	6.46805	0.0109831	0.133102
ENSG00000114771	AADAC	10.9572	-0.0639819	6.46788	0.0109841	NA
ENSG00000172878	METAP1D	169.515	0.00977712	6.46765	0.0109856	0.133102
ENSG00000130558	OLFM1	61.3969	-0.0365577	6.46713	0.0109888	0.133102
ENSG00000116586	LAMTOR2	776.491	-0.00682307	6.46538	0.0109996	0.133102
ENSG00000162714	ZNF496	895.277	0.00969388	6.46451	0.011005	0.133102
ENSG00000117298	ECE1	9465.85	-0.0113266	6.46222	0.0110192	0.133163
ENSG00000176788	BASP1	8122.05	-0.0114012	6.45868	0.0110411	0.133316
ENSG00000274021		14.9426	-0.0307074	6.45346	0.0110736	NA
ENSG00000254343		10.6912	0.0301521	6.45316	0.0110755	NA
ENSG00000118898	PPL	26.5082	-0.0581171	6.44998	0.0110954	0.133859
ENSG00000160469	BRSK1	260.684	-0.0183603	6.44571	0.0111221	0.134069
ENSG00000139410	SDSL	146.169	-0.0194904	6.44056	0.0111543	0.134244
ENSG00000268750		25.7582	0.023241	6.4387	0.011166	0.134244
ENSG00000066322	ELOVL1	2786.94	-0.0104256	6.43775	0.011172	0.134244
ENSG00000116649	SRM	4712.43	-0.0118344	6.43625	0.0111814	0.134244
ENSG00000149658	YTHDF1	1304.03	0.00519535	6.4349	0.01119	0.134244
ENSG00000126003	PLAGL2	776.378	0.00940911	6.42912	0.0112264	0.134244
ENSG00000135999	EPC2	417.427	0.0104195	6.4291	0.0112266	0.134244
ENSG00000071909	MYO3B	12.577	0.0376169	6.42874	0.0112289	NA
ENSG00000183878	UTY	126.995	0.0179749	6.4286	0.0112297	0.134244
ENSG00000157214	STEAP2	113.264	-0.0298812	6.42819	0.0112323	0.134244
ENSG00000114268	PFKFB4	288.67	-0.0198527	6.42721	0.0112385	0.134244
ENSG00000197956	S100A6	18068.5	-0.0166422	6.42594	0.0112466	0.134244
ENSG00000105963	ADAP1	125.706	-0.0258976	6.42567	0.0112483	0.134244
ENSG00000141873	SLC39A3	829.374	-0.00726016	6.42277	0.0112666	0.134352
ENSG00000269899		20.974	-0.030794	6.41477	0.0113175	0.134737
ENSG00000120509	PDZD11	940.223	-0.00826957	6.41401	0.0113223	0.134737
ENSG00000230989	HSBP1	2054.48	-0.00560863	6.4133	0.0113269	0.134737
ENSG00000233608	TWIST2	465.627	-0.0220338	6.41103	0.0113414	0.134798
ENSG00000154133	ROBO4	19.5107	-0.0488536	6.40602	0.0113734	NA
ENSG00000102977	ACD	397.269	-0.0127681	6.40524	0.0113784	0.135127
ENSG00000107175	CREB3	2919.58	-0.00968983	6.40292	0.0113933	0.135176
ENSG00000259343	TMC3-AS1	36.4978	0.0221757	6.40168	0.0114013	0.135176
ENSG00000197535	MYO5A	1408.59	-0.0125132	6.39947	0.0114154	0.135232
ENSG00000110693	SOX6	70.5144	-0.0243152	6.39464	0.0114466	0.1354
ENSG00000101266	CSNK2A1	2892.07	-0.00457457	6.39436	0.0114483	0.1354
ENSG00000151276	MAGI1	1921.13	0.0163015	6.38301	0.0115218	0.136109
ENSG00000136378	ADAMTS7	2120.12	0.015947	6.38219	0.0115271	0.136109
ENSG00000188785	ZNF548	193.207	0.00848139	6.38001	0.0115413	0.136164
ENSG00000183779	ZNF703	3414.34	-0.0135013	6.37665	0.0115631	0.136311
ENSG00000067601	PMS2P4	22.2167	-0.0202677	6.37334	0.0115848	0.136454
ENSG00000138101	DTNB	227.291	0.0204429	6.37064	0.0116023	0.13655
ENSG00000204406	MBD5	432.74	0.0122794	6.36514	0.0116384	0.136813
ENSG00000184640	SEPTIN9	10711.3	-0.0118912	6.36433	0.0116437	0.136813
ENSG00000162551	ALPL	79.1807	-0.059077	6.36245	0.011656	0.136841
ENSG00000103066	PLA2G15	2060.11	-0.0155297	6.36109	0.011665	0.136841
ENSG00000135116	HRK	13.6282	-0.0359343	6.36006	0.0116717	NA
ENSG00000184677	ZBTB40	919.855	0.0110467	6.35199	0.011725	0.137433
ENSG00000144824	PHLDB2	2292.48	0.0156976	6.34926	0.011743	0.137532
ENSG00000146757	ZNF92	139.827	0.0166829	6.34309	0.0117839	0.13758
ENSG00000175866	BAIAP2	694.762	-0.0110505	6.34237	0.0117888	0.13758
ENSG00000108306	FBXL20	589.259	0.0104472	6.33793	0.0118182	0.13758
ENSG00000172803	SNX32	26.9065	0.0364232	6.33765	0.0118201	0.13758
ENSG00000153071	DAB2	10952.7	-0.0157333	6.3376	0.0118205	0.13758
ENSG00000172965	MIR4435-2HG	1176.53	-0.0149844	6.33593	0.0118316	0.13758
ENSG00000157870	PRXL2B	978.494	-0.0103361	6.33566	0.0118334	0.13758
ENSG00000164924	YWHAZ	13806.2	-0.00651422	6.33493	0.0118383	0.13758
ENSG00000106635	BCL7B	1251.68	-0.00761603	6.33181	0.0118591	0.13758
ENSG00000146197	SCUBE3	691.807	0.0521822	6.3313	0.0118625	0.13758
ENSG00000217929	SEPTIN14P6	251.163	0.0189287	6.33043	0.0118683	0.13758
ENSG00000170836	PPM1D	515.715	0.0151131	6.33018	0.0118701	0.13758
ENSG00000198356	GET3	1830.85	-0.00630092	6.33003	0.0118711	0.13758
ENSG00000077549	CAPZB	7777.32	-0.0064443	6.32858	0.0118807	0.137582
ENSG00000168062	BATF2	20.9996	-0.0420552	6.32329	0.0119162	0.137882
ENSG00000149090	PAMR1	1535.93	-0.0318393	6.3211	0.0119309	0.137942
ENSG00000214338	SOGA3	86.1153	-0.0236773	6.31936	0.0119427	0.137967
ENSG00000137100	DCTN3	1015.5	-0.00759224	6.3166	0.0119613	0.138072
ENSG00000170647		45.5106	0.0188412	6.3115	0.0119957	0.138358
ENSG00000189079	ARID2	475.879	0.0124642	6.30016	0.0120727	0.139052
ENSG00000147872	PLIN2	1556.9	-0.0214565	6.29981	0.0120751	0.139052
ENSG00000255153	TOLLIP-DT	15.0749	-0.0228812	6.29975	0.0120755	NA
ENSG00000198929	NOS1AP	39.2558	0.0307536	6.29201	0.0121284	0.139554
ENSG00000136100	VPS36	682.341	0.00728793	6.28856	0.0121519	0.139714
ENSG00000129194	SOX15	10.1531	-0.034806	6.28512	0.0121756	NA
ENSG00000203867	RBM20	16.7567	-0.0456838	6.28433	0.012181	NA
ENSG00000203722	RAET1G	37.0376	-0.0268804	6.28354	0.0121864	0.13997
ENSG00000030066	NUP160	567.168	0.00694074	6.27951	0.0122142	0.13997
ENSG00000111846	GCNT2	29.1171	-0.0745961	6.279	0.0122177	0.13997
ENSG00000244187	TMEM141	503.629	-0.0122702	6.27757	0.0122276	0.13997
ENSG00000175701	MTLN	263.23	-0.0159677	6.27745	0.0122284	0.13997
ENSG00000144504	ANKMY1	191.164	-0.0106835	6.27687	0.0122324	0.13997
ENSG00000068024	HDAC4	328.753	0.00898856	6.27415	0.0122512	0.140073
ENSG00000128654	MTX2	578.262	-0.00692776	6.27229	0.012264	0.140109
ENSG00000130066	SAT1	2442.2	-0.0266109	6.27021	0.0122785	0.140163
ENSG00000106211	HSPB1	17055.6	-0.0118868	6.26718	0.0122995	0.140267
ENSG00000248223		390.132	-0.0330802	6.2661	0.012307	0.140267
ENSG00000242615		41.4992	-0.0157067	6.2545	0.0123878	0.140789
ENSG00000163734	CXCL3	267.452	-0.0691342	6.2537	0.0123934	0.140789
ENSG00000254486	LINC02547	10.3514	-0.0377232	6.25254	0.0124015	NA
ENSG00000108465	CDK5RAP3	1780.68	0.00994141	6.2521	0.0124046	0.140789
ENSG00000198945	L3MBTL3	419.454	0.0123096	6.25185	0.0124063	0.140789
ENSG00000155975	VPS37A	1142.41	-0.00769199	6.25171	0.0124073	0.140789
ENSG00000171658	NMRAL2P	52.9865	-0.0449042	6.25114	0.0124113	0.140789
ENSG00000214253	FIS1	1920.03	-0.00747537	6.24628	0.0124455	0.140964
ENSG00000135966	TGFBRAP1	1630.22	0.0126676	6.24616	0.0124463	0.140964
ENSG00000254999	BRK1	2264.56	-0.00590765	6.24181	0.0124769	0.141199
ENSG00000115183	TANC1	1788.7	0.0133609	6.23314	0.0125382	0.141577
ENSG00000255737	AGAP2-AS1	618.176	-0.011182	6.23298	0.0125393	0.141577
ENSG00000147041	SYTL5	92.5878	0.0601424	6.23291	0.0125397	0.141577
ENSG00000137834	SMAD6	367.679	0.0286658	6.22404	0.0126027	0.142086
ENSG00000119401	TRIM32	823.261	0.0119742	6.22355	0.0126062	0.142086
ENSG00000165072	MAMDC2	121.387	-0.0424384	6.21871	0.0126407	0.142086
ENSG00000185885	IFITM1	918.518	-0.0425616	6.21853	0.012642	0.142086
ENSG00000126522	ASL	888.301	-0.0136262	6.21788	0.0126466	0.142086
ENSG00000163069	SGCB	2783.7	-0.00877716	6.21768	0.012648	0.142086
ENSG00000152558	TMEM123	2952.41	0.0085257	6.2165	0.0126565	0.142086
ENSG00000124406	ATP8A1	54.218	-0.0436995	6.21452	0.0126707	0.142086
ENSG00000205213	LGR4	441.371	0.0176282	6.21403	0.0126742	0.142086
ENSG00000175573	C11orf68	1263.38	-0.00822103	6.21232	0.0126865	0.142086
ENSG00000123975	CKS2	510.007	-0.0162661	6.21118	0.0126946	0.142086
ENSG00000186141	POLR3C	663.917	-0.00611047	6.21001	0.012703	0.142086
ENSG00000180098	TRNAU1AP	315.047	-0.0080432	6.20531	0.0127367	0.142353
ENSG00000260400		28.3016	0.0265234	6.20253	0.0127568	0.142363
ENSG00000137809	ITGA11	21302.3	0.0344626	6.20245	0.0127573	0.142363
ENSG00000169727	GPS1	2931.67	-0.00678533	6.19818	0.0127882	0.142543
ENSG00000089127	OAS1	57.795	-0.0892945	6.19634	0.0128014	0.142543
ENSG00000175643	RMI2	33.5261	-0.0277302	6.19611	0.0128031	0.142543
ENSG00000262413		73.1909	-0.0242074	6.19408	0.0128179	0.142598
ENSG00000132563	REEP2	595.797	-0.0185688	6.19077	0.0128418	0.142754
ENSG00000099282	TSPAN15	274.964	0.0287669	6.18739	0.0128664	0.142917
ENSG00000101384	JAG1	450.551	-0.021421	6.18013	0.0129192	0.143394
ENSG00000136279	DBNL	3386.34	-0.00650209	6.17425	0.0129623	0.143744
ENSG00000178568	ERBB4	16.8824	0.0387595	6.17424	0.0129624	NA
ENSG00000144635	DYNC1LI1	969.483	-0.00845674	6.1731	0.0129707	0.143744
ENSG00000134058	CDK7	857.43	-0.00778079	6.1717	0.012981	0.143747
ENSG00000115756	HPCAL1	737.515	-0.0159414	6.16598	0.013023	0.144102
ENSG00000140600	SH3GL3	32.8462	0.0356948	6.16337	0.0130423	0.144177
ENSG00000135454	B4GALNT1	418.957	-0.0300919	6.16235	0.0130498	0.144177
ENSG00000240065	PSMB9	52.6958	-0.034893	6.15693	0.0130898	0.144463
ENSG00000112379	ARFGEF3	134.064	-0.0400051	6.15614	0.0130957	0.144463
ENSG00000230082	PRRT3-AS1	21.0716	-0.0266915	6.14914	0.0131476	0.144925
ENSG00000267216	ZNF8-ERVK3-1	31.6938	0.0283813	6.14649	0.0131673	0.145031
ENSG00000188042	ARL4C	1005.67	-0.0236586	6.14338	0.0131905	0.145126
ENSG00000130305	NSUN5	419.387	-0.00976183	6.14188	0.0132017	0.145126
ENSG00000137094	DNAJB5	588.535	0.0157652	6.14019	0.0132143	0.145126
ENSG00000257139	LINC02821	51.1384	0.0221045	6.13995	0.0132161	0.145126
ENSG00000260507		17.0948	-0.0282621	6.13503	0.013253	NA
ENSG00000132481	TRIM47	253.984	-0.0293099	6.13494	0.0132536	0.145323
ENSG00000076242	MLH1	716.213	-0.00793818	6.13486	0.0132542	0.145323
ENSG00000185634	SHC4	23.4351	-0.0242064	6.12967	0.0132932	0.145559
ENSG00000169895	SYAP1	1716.37	-0.00633639	6.1293	0.013296	0.145559
ENSG00000169282	KCNAB1	9.49853	-0.0947066	6.12808	0.0133051	NA
ENSG00000173926	MARCHF3	747.853	0.0213697	6.12666	0.0133158	0.145666
ENSG00000148291	SURF2	297.327	-0.0102189	6.12378	0.0133375	0.145767
ENSG00000186834	HEXIM1	1671.79	0.0086277	6.12277	0.0133452	0.145767
ENSG00000139132	FGD4	157.041	-0.0284013	6.1148	0.0134055	0.146314
ENSG00000141576	RNF157	18.1013	-0.0329334	6.11131	0.013432	NA
ENSG00000169020	ATP5ME	1356.44	-0.00907636	6.1108	0.0134358	0.146535
ENSG00000163162	RNF149	933.158	-0.0116274	6.10881	0.013451	0.146589
ENSG00000188895	MSL1	1978.16	0.00575761	6.10671	0.0134669	0.146652
ENSG00000103363	ELOB	2332.06	-0.00890109	6.10269	0.0134976	0.146875
ENSG00000198612	COPS8	1236.97	-0.00726415	6.10026	0.0135162	0.146884
ENSG00000138675	FGF5	1075.09	-0.0281954	6.09992	0.0135188	0.146884
ENSG00000115685	PPP1R7	1649.79	-0.00866828	6.09454	0.0135601	0.147034
ENSG00000185627	PSMD13	2448.38	-0.00748235	6.09408	0.0135635	0.147034
ENSG00000147180	ZNF711	67.4717	0.0280157	6.0933	0.0135695	0.147034
ENSG00000175087	PDIK1L	54.4224	0.0146916	6.09281	0.0135733	0.147034
ENSG00000092529	CAPN3	29.1778	0.026497	6.08754	0.0136138	0.147269
ENSG00000197217	ENTPD4	2584.09	0.00987219	6.08734	0.0136154	0.147269
ENSG00000117592	PRDX6	6926.82	-0.0131595	6.08493	0.013634	0.147359
ENSG00000164929	BAALC	32.9395	-0.0515642	6.08121	0.0136627	0.14756
ENSG00000197037	ZSCAN25	257.126	0.00610945	6.07476	0.0137127	0.147926
ENSG00000147526	TACC1	1635.58	-0.0108884	6.07418	0.0137172	0.147926
ENSG00000167363	FN3K	241.195	-0.0161675	6.07204	0.0137339	0.147995
ENSG00000148672	GLUD1	2434.22	-0.00709394	6.06916	0.0137563	0.148126
ENSG00000184524	CEND1	143.744	-0.0347925	6.06737	0.0137702	0.148166
ENSG00000100916	BRMS1L	150.297	0.0108995	6.06165	0.0138149	0.148535
ENSG00000274177		12.8488	-0.0263191	6.0588	0.0138372	NA
ENSG00000135622	SEMA4F	470.867	-0.0128025	6.05685	0.0138525	0.148792
ENSG00000222009	BTBD19	863.828	0.0139016	6.05597	0.0138594	0.148792
ENSG00000229018	PMS2P7	22.1466	-0.0172932	6.04833	0.0139195	0.149326
ENSG00000132341	RAN	6405.34	-0.00843739	6.04402	0.0139535	0.14958
ENSG00000123700	KCNJ2	64.2958	-0.058939	6.04257	0.013965	0.149592
ENSG00000166289	PLEKHF1	371.319	-0.0226604	6.03759	0.0140044	0.149903
ENSG00000261799		89.3854	0.0131833	6.03558	0.0140203	0.149962
ENSG00000073849	ST6GAL1	705.991	0.0215642	6.03248	0.014045	0.150018
ENSG00000246705	H2AJ	1434.56	-0.0106532	6.03231	0.0140463	0.150018
ENSG00000145020	AMT	72.1576	0.021627	6.02838	0.0140777	0.150224
ENSG00000168439	STIP1	4135.7	-0.00877942	6.02652	0.0140925	0.150224
ENSG00000105617	LENG1	234.29	-0.0108832	6.02597	0.0140969	0.150224
ENSG00000089041	P2RX7	15.8607	-0.0354752	6.01929	0.0141504	NA
ENSG00000154864	PIEZO2	1939.32	0.0395793	6.01772	0.0141629	0.150596
ENSG00000173947	PIFO	15.3181	0.0265869	6.01618	0.0141753	NA
ENSG00000104976	SNAPC2	810.222	-0.0106167	6.01585	0.014178	0.150596
ENSG00000133056	PIK3C2B	422.36	0.0252175	6.01419	0.0141913	0.150596
ENSG00000165617	DACT1	1165.14	0.0213442	6.01325	0.0141988	0.150596
ENSG00000132128	LRRC41	3004.95	-0.00533817	6.01312	0.0141999	0.150596
ENSG00000082641	NFE2L1	20015.2	-0.013349	6.01299	0.014201	0.150596
ENSG00000237441	RGL2	851.356	0.008247	6.01136	0.0142141	0.150596
ENSG00000167157	PRRX2	59.6489	-0.0492737	6.01122	0.0142152	0.150596
ENSG00000075303	SLC25A40	131.148	0.0116664	6.00812	0.0142402	0.15073
ENSG00000162885	B3GALNT2	285.792	0.0105351	6.00705	0.0142488	0.15073
ENSG00000134086	VHL	616.403	0.0102143	6.00396	0.0142738	0.150884
ENSG00000257103	LSM14A	2033.25	0.00660566	6.00169	0.0142922	0.150968
ENSG00000144331	ZNF385B	10.2063	0.0755209	5.99691	0.014331	NA
ENSG00000180318	ALX1	21.3292	-0.0756387	5.99517	0.0143451	0.151289
ENSG00000174791	RIN1	879.135	-0.0218513	5.99391	0.0143554	0.151289
ENSG00000115053	NCL	13434.3	-0.00779052	5.99214	0.0143697	0.151289
ENSG00000067191	CACNB1	376.229	-0.0136218	5.99209	0.0143701	0.151289
ENSG00000250182	EEF1A1P13	11.2104	0.0376947	5.98932	0.0143928	NA
ENSG00000155111	CDK19	498.677	0.0110395	5.98843	0.0144	0.151289
ENSG00000102409	BEX4	600.48	0.0225903	5.98742	0.0144083	0.151289
ENSG00000133640	LRRIQ1	12.3546	-0.0328281	5.98446	0.0144325	NA
ENSG00000006638	TBXA2R	172.77	-0.0143751	5.98386	0.0144374	0.151289
ENSG00000272631		53.444	0.0152805	5.98363	0.0144392	0.151289
ENSG00000138018	SELENOI	560.828	-0.0102694	5.98038	0.0144659	0.151289
ENSG00000146410	MTFR2	26.1565	-0.0246459	5.98026	0.0144669	0.151289
ENSG00000110344	UBE4A	1567.71	0.00769514	5.97988	0.01447	0.151289
ENSG00000213398	LCAT	323.471	0.0187287	5.97842	0.014482	0.151289
ENSG00000147955	SIGMAR1	3873.26	-0.00885008	5.97831	0.0144829	0.151289
ENSG00000125734	GPR108	1453.91	-0.011217	5.97801	0.0144853	0.151289
ENSG00000258441	LINC00641	313.609	0.0168618	5.97763	0.0144885	0.151289
ENSG00000138650	PCDH10	15065.4	0.02897	5.9767	0.0144961	0.151289
ENSG00000143643	TTC13	611.128	-0.0124117	5.97552	0.0145058	0.151289
ENSG00000240225	ZNF542P	211.864	0.0175086	5.97457	0.0145136	0.151289
ENSG00000214021	TTLL3	1020.15	0.0163492	5.97357	0.0145218	0.151289
ENSG00000005339	CREBBP	2843.56	0.00824157	5.97073	0.0145452	0.151424
ENSG00000047936	ROS1	11.2304	0.0460121	5.96968	0.0145539	NA
ENSG00000157216	SSBP3	1903.03	0.0195579	5.96915	0.0145583	0.15145
ENSG00000168918	INPP5D	32.6746	0.0377293	5.96476	0.0145946	0.151581
ENSG00000164074	ABHD18	135.005	0.00786606	5.96374	0.014603	0.151581
ENSG00000170142	UBE2E1	1172.92	-0.00642371	5.96222	0.0146156	0.151581
ENSG00000159167	STC1	502.996	-0.0543861	5.96126	0.0146236	0.151581
ENSG00000254221	PCDHGB1	82.3456	0.0348734	5.96052	0.0146297	0.151581
ENSG00000133466	C1QTNF6	582.345	0.0191295	5.9586	0.0146456	0.151581
ENSG00000073464	CLCN4	268.104	0.0216768	5.95721	0.0146572	0.151581
ENSG00000114520	SNX4	368.901	0.00742191	5.95688	0.01466	0.151581
ENSG00000185298	CCDC137	736.033	-0.00819208	5.95623	0.0146654	0.151581
ENSG00000148737	TCF7L2	879.576	0.0135726	5.95472	0.0146779	0.151602
ENSG00000153234	NR4A2	34.2319	0.0425243	5.94882	0.0147272	0.152002
ENSG00000121895	TMEM156	26.5732	-0.048165	5.94634	0.0147479	0.152071
ENSG00000132676	DAP3	1938.29	-0.0054184	5.94549	0.014755	0.152071
ENSG00000172831	CES2	1443.73	-0.0102768	5.94118	0.0147911	0.152235
ENSG00000188739	RBM34	758.478	-0.00699891	5.94038	0.0147978	0.152235
ENSG00000099804	CDC34	2043.58	-0.00770584	5.93982	0.0148025	0.152235
ENSG00000105355	PLIN3	7131.1	-0.00809519	5.93204	0.014868	0.1528
ENSG00000197165	SULT1A2	14.264	0.026623	5.93082	0.0148783	NA
ENSG00000257800	FNBP1P1	13.7663	0.0280816	5.92968	0.0148879	NA
ENSG00000149187	CELF1	1946.27	0.00557547	5.92673	0.0149129	0.153054
ENSG00000167987	VPS37C	797.226	-0.00825999	5.92661	0.0149139	0.153054
ENSG00000225880	LINC00115	27.3358	0.0234518	5.92189	0.0149539	0.153355
ENSG00000173113	TRMT112	2201.19	-0.00750195	5.91709	0.0149947	0.153593
ENSG00000254093	PINX1	229.588	-0.0104505	5.91665	0.0149984	0.153593
ENSG00000168394	TAP1	1629	-0.0132856	5.91461	0.0150159	0.153662
ENSG00000100243	CYB5R3	18781.9	-0.00853478	5.90564	0.0150925	0.154264
ENSG00000174482	LINGO2	201.271	0.0343878	5.90522	0.0150961	0.154264
ENSG00000135269	TES	2620.6	0.0175832	5.90047	0.0151369	0.154572
ENSG00000115761	NOL10	752.547	-0.00638157	5.89662	0.01517	0.154801
ENSG00000116120	FARSB	1032.88	-0.0108229	5.89436	0.0151894	0.154889
ENSG00000268416		15.3645	0.0272366	5.8942	0.0151909	NA
ENSG00000165501	LRR1	146.906	-0.0120337	5.89057	0.0152222	0.155113
ENSG00000169607	CKAP2L	152.655	-0.0392025	5.88715	0.0152517	0.155305
ENSG00000116754	SRSF11	2782.65	0.00859334	5.88558	0.0152654	0.155329
ENSG00000123999	INHA	39.8778	0.0237606	5.8844	0.0152756	0.155329
ENSG00000175334	BANF1	2049	-0.0111569	5.88249	0.0152922	0.155388
ENSG00000129566	TEP1	724.687	0.00938131	5.87343	0.0153711	0.15608
ENSG00000140263	SORD	592.506	-0.0144658	5.86923	0.0154078	0.156204
ENSG00000198130	HIBCH	274.982	0.0087911	5.86845	0.0154147	0.156204
ENSG00000127663	KDM4B	1540.55	0.00873035	5.86832	0.0154158	0.156204
ENSG00000092421	SEMA6A	237.602	-0.0384297	5.86242	0.0154675	0.156618
ENSG00000183775	KCTD16	667.866	0.0207487	5.85644	0.0155201	0.157041
ENSG00000180011	PTGR3	462.931	0.011459	5.84971	0.0155796	0.157532
ENSG00000151967	SCHIP1	263.208	0.0164083	5.84426	0.015628	0.15791
ENSG00000198832	SELENOM	4399.83	-0.00996743	5.84091	0.0156577	0.1581
ENSG00000139880	CDH24	463.627	0.0153329	5.83894	0.0156753	0.158167
ENSG00000241468	ATP5MF	2420.32	-0.00772426	5.83665	0.0156956	0.158262
ENSG00000107186	MPDZ	1593.56	0.0112863	5.82847	0.0157688	0.1587
ENSG00000100983	GSS	1360.62	-0.00789809	5.82779	0.0157749	0.1587
ENSG00000101557	USP14	2229.37	-0.00573591	5.82675	0.0157843	0.1587
ENSG00000138613	APH1B	486.14	-0.0100338	5.82641	0.0157873	0.1587
ENSG00000144476	ACKR3	35.1085	0.0709026	5.82428	0.0158064	0.1587
ENSG00000100626	GALNT16	53.5927	-0.0348459	5.82083	0.0158374	0.1587
ENSG00000112715	VEGFA	6352.25	-0.0181438	5.82035	0.0158418	0.1587
ENSG00000175197	DDIT3	1048.61	-0.0237756	5.81999	0.0158451	0.1587
ENSG00000114744	COMMD2	517.094	0.00681654	5.81972	0.0158475	0.1587
ENSG00000007080	CCDC124	1884.88	-0.00838585	5.81798	0.0158632	0.1587
ENSG00000166963	MAP1A	12267.6	-0.0147998	5.81723	0.0158699	0.1587
ENSG00000100319	ZMAT5	319.494	-0.007602	5.8165	0.0158765	0.1587
ENSG00000100154	TTC28	1732.28	0.0101919	5.81455	0.0158942	0.1587
ENSG00000162267	ITIH3	26.1516	0.0375835	5.81352	0.0159034	0.1587
ENSG00000074964	ARHGEF10L	527.218	-0.010566	5.81344	0.0159041	0.1587
ENSG00000088832	FKBP1A	6452.33	-0.00878901	5.8104	0.0159317	0.158865
ENSG00000139826	ABHD13	324.457	0.00950237	5.80755	0.0159575	0.158887
ENSG00000008083	JARID2	445.99	0.0094502	5.80702	0.0159623	0.158887
ENSG00000175115	PACS1	7624.01	0.0117754	5.8063	0.0159688	0.158887
ENSG00000163811	WDR43	1338.48	-0.00700981	5.80531	0.0159779	0.158887
ENSG00000204463	BAG6	6737.21	-0.00494058	5.80247	0.0160037	0.158989
ENSG00000270562		21.284	0.0404828	5.79997	0.0160264	0.158989
ENSG00000130962	PRRG1	863.79	0.0187239	5.79953	0.0160305	0.158989
ENSG00000204843	DCTN1	9994.61	-0.00822791	5.79933	0.0160323	0.158989
ENSG00000128524	ATP6V1F	3237.25	-0.00672137	5.79775	0.0160467	0.159024
ENSG00000011201	ANOS1	769.081	0.0242959	5.79523	0.0160697	0.159119
ENSG00000136111	TBC1D4	1005.5	0.0150807	5.79419	0.0160792	0.159119
ENSG00000263335		27.7976	0.0332828	5.79286	0.0160913	0.159119
ENSG00000143363	PRUNE1	230.302	0.00961386	5.787	0.0161451	0.159119
ENSG00000074590	NUAK1	3282.98	0.0216571	5.78691	0.0161459	0.159119
ENSG00000253251	SHLD3	33.5846	0.014461	5.7867	0.0161478	0.159119
ENSG00000204262	COL5A2	50546.2	0.016054	5.78639	0.0161507	0.159119
ENSG00000168303	MPLKIP	543.556	0.0124364	5.78561	0.0161579	0.159119
ENSG00000076641	PAG1	139.335	-0.0254052	5.7827	0.0161847	0.159119
ENSG00000120616	EPC1	449.928	0.006732	5.78268	0.0161849	0.159119
ENSG00000136444	RSAD1	637.631	0.00628876	5.78243	0.0161872	0.159119
ENSG00000230844	ZNF674-AS1	66.5819	0.0142057	5.78151	0.0161956	0.159119
ENSG00000276805		109.865	-0.0148807	5.77917	0.0162172	0.159119
ENSG00000127952	STYXL1	545.178	-0.00898226	5.77896	0.0162191	0.159119
ENSG00000235609		71.8582	0.0207534	5.77699	0.0162373	0.159119
ENSG00000151388	ADAMTS12	6555.14	0.0209077	5.77615	0.0162451	0.159119
ENSG00000124839	RAB17	35.1532	0.0381969	5.7761	0.0162455	0.159119
ENSG00000132716	DCAF8	2145.78	0.00597837	5.77509	0.0162548	0.159119
ENSG00000138316	ADAMTS14	160.309	-0.0387953	5.77171	0.0162862	0.159318
ENSG00000147050	KDM6A	559.482	0.011972	5.76884	0.0163128	0.15947
ENSG00000115267	IFIH1	182.815	-0.0285382	5.76598	0.0163394	0.159622
ENSG00000161653	NAGS	19.6033	-0.0232767	5.76393	0.0163585	NA
ENSG00000128191	DGCR8	1147.54	0.00808568	5.76061	0.0163894	0.159904
ENSG00000078403	MLLT10	601.613	0.00567135	5.76049	0.0163905	0.159904
ENSG00000160179	ABCG1	22.9023	-0.0524019	5.75847	0.0164094	0.159905
ENSG00000090238	YPEL3	734.315	0.0135997	5.75742	0.0164192	0.159905
ENSG00000224877	NDUFAF8	767.712	-0.00809277	5.75692	0.0164239	0.159905
ENSG00000177606	JUN	3359.31	-0.0158832	5.7555	0.0164371	0.159926
ENSG00000141526	SLC16A3	14617.9	-0.0122774	5.75299	0.0164606	0.159996
ENSG00000165802	NSMF	1968.98	-0.00783011	5.752	0.0164699	0.159996
ENSG00000100908	EMC9	174.053	-0.0163141	5.74994	0.0164892	0.159996
ENSG00000184949	FAM227A	81.7688	0.018986	5.74905	0.0164976	0.159996
ENSG00000163468	CCT3	5829.57	-0.00771289	5.74729	0.0165141	0.159996
ENSG00000072062	PRKACA	3006.86	-0.0076505	5.74659	0.0165207	0.159996
ENSG00000122203	KIAA1191	2941.19	-0.00681074	5.74647	0.0165218	0.159996
ENSG00000140416	TPM1	39223.2	0.016815	5.74208	0.0165632	0.160161
ENSG00000203497	PDCD4-AS1	26.6165	0.0180822	5.7416	0.0165677	0.160161
ENSG00000173267	SNCG	85.9783	-0.0277588	5.73987	0.016584	0.160161
ENSG00000169692	AGPAT2	1575.45	-0.00969347	5.73952	0.0165873	0.160161
ENSG00000062370	ZNF112	127.132	0.00889603	5.73877	0.0165944	0.160161
ENSG00000188559	RALGAPA2	229.817	0.0145903	5.73261	0.0166527	0.160596
ENSG00000164764	SBSPON	56.904	0.0907514	5.73166	0.0166617	0.160596
ENSG00000261377	PDCD6IPP2	46.3847	0.0343947	5.72877	0.0166892	0.160606
ENSG00000070501	POLB	212.15	-0.0107693	5.72728	0.0167034	0.160606
ENSG00000188229	TUBB4B	6289.07	-0.0173342	5.72648	0.016711	0.160606
ENSG00000197632	SERPINB2	962.085	-0.0612109	5.72613	0.0167143	0.160606
ENSG00000139433	GLTP	1378.04	-0.00779436	5.72481	0.0167268	0.160606
ENSG00000213085	CFAP45	30.1238	-0.0206486	5.72358	0.0167386	0.160606
ENSG00000133597	ADCK2	340.467	-0.0155771	5.72336	0.0167407	0.160606
ENSG00000167552	TUBA1A	13297.1	-0.0166496	5.71427	0.0168275	0.161199
ENSG00000160785	SLC25A44	1031.91	0.00688047	5.71399	0.0168303	0.161199
ENSG00000145604	SKP2	1000.01	0.0220858	5.71338	0.0168361	0.161199
ENSG00000113838	TBCCD1	211.25	0.00748675	5.71195	0.0168498	0.161224
ENSG00000162433	AK4	559.112	-0.0296354	5.70673	0.0169	0.161597
ENSG00000189339	SLC35E2B	3062.84	0.00818567	5.70321	0.0169339	0.16168
ENSG00000112514	CUTA	3510.41	-0.00669662	5.7005	0.0169601	0.16168
ENSG00000170381	SEMA3E	42.3241	-0.0562626	5.70027	0.0169623	0.16168
ENSG00000150768	DLAT	905.099	-0.00735127	5.69938	0.016971	0.16168
ENSG00000010322	NISCH	3406.23	0.00881963	5.69887	0.0169758	0.16168
ENSG00000096384	HSP90AB1	24784.2	-0.00631038	5.69886	0.0169759	0.16168
ENSG00000107968	MAP3K8	209.931	0.0253843	5.69281	0.0170345	0.162035
ENSG00000117691	NENF	734.786	-0.00855983	5.6927	0.0170356	0.162035
ENSG00000212993	POU5F1B	12.4275	0.0275559	5.69119	0.0170503	NA
ENSG00000172650	AGAP5	130.303	0.0185215	5.69067	0.0170554	0.162116
ENSG00000166128	RAB8B	695.161	-0.0130779	5.6881	0.0170803	0.162246
ENSG00000131849	ZNF132	75.2745	0.014719	5.68163	0.0171434	0.162738
ENSG00000141458	NPC1	2981.21	-0.0219444	5.67879	0.0171712	0.162895
ENSG00000065328	MCM10	61.8146	-0.045823	5.672	0.0172378	0.163419
ENSG00000155876	RRAGA	2120.46	-0.00570655	5.66822	0.017275	0.163576
ENSG00000101955	SRPX	1223.78	-0.0205286	5.66693	0.0172877	0.163576
ENSG00000211459	MT-RNR1	44470.7	-0.0195125	5.66571	0.0172997	0.163576
ENSG00000160214	RRP1	910.716	-0.00826728	5.66521	0.0173046	0.163576
ENSG00000276850		56.2797	0.0344167	5.66457	0.017311	0.163576
ENSG00000137274	BPHL	236.942	-0.00894561	5.66205	0.0173359	0.163704
ENSG00000263753	LINC00667	712.695	0.00966631	5.65971	0.017359	0.163745
ENSG00000185651	UBE2L3	3583.13	-0.00620346	5.65931	0.017363	0.163745
ENSG00000115652	UXS1	2235.42	-0.0104389	5.65733	0.0173826	0.163823
ENSG00000197776	KLHDC1	32.6577	0.0159727	5.65426	0.017413	0.164003
ENSG00000154358	OBSCN	1148.58	0.0183318	5.65268	0.0174287	0.164028
ENSG00000273015	LINC00938	147.658	0.00878569	5.65171	0.0174384	0.164028
ENSG00000072736	NFATC3	735.199	0.00694535	5.64804	0.0174749	0.164133
ENSG00000122779	TRIM24	1033.64	0.0133327	5.64689	0.0174864	0.164133
ENSG00000134668	SPOCD1	2809.36	-0.0198309	5.64569	0.0174983	0.164133
ENSG00000275371		12.5892	0.0316195	5.64546	0.0175006	NA
ENSG00000090273	NUDC	2838.14	-0.00804736	5.64502	0.017505	0.164133
ENSG00000102172	SMS	2608.99	-0.00943372	5.64487	0.0175065	0.164133
ENSG00000078098	FAP	7309.19	0.0196321	5.64105	0.0175447	0.164167
ENSG00000116171	SCP2	1480.98	-0.0116214	5.63921	0.0175631	0.164167
ENSG00000178919	FOXE1	74.6953	-0.092877	5.63641	0.0175912	0.164167
ENSG00000267328		94.6427	-0.0477076	5.63533	0.017602	0.164167
ENSG00000116957		534.718	-0.00879799	5.63288	0.0176267	0.164167
ENSG00000188677	PARVB	957.502	-0.00850635	5.63214	0.0176341	0.164167
ENSG00000131797	CLUHP3	115.67	0.0144457	5.6318	0.0176375	0.164167
ENSG00000154328	NEIL2	274.159	-0.00804153	5.63174	0.0176381	0.164167
ENSG00000198496	NBR2	77.0504	0.0189717	5.63124	0.0176432	0.164167
ENSG00000152082	MZT2B	2702.33	-0.0116727	5.63059	0.0176497	0.164167
ENSG00000178498	DTX3	812.571	0.00997276	5.62862	0.0176695	0.164167
ENSG00000259583	ALDH1A3-AS1	70.4273	-0.0146805	5.62727	0.0176832	0.164167
ENSG00000148730	EIF4EBP2	2751.96	0.011589	5.6265	0.0176909	0.164167
ENSG00000239382	ALKBH6	416.153	-0.00952935	5.62615	0.0176944	0.164167
ENSG00000269837	IPO5P1	44.6316	0.0168611	5.62548	0.0177012	0.164167
ENSG00000188015	S100A3	46.3724	-0.036243	5.62474	0.0177087	0.164167
ENSG00000108518	PFN1	39401	-0.0104727	5.62426	0.0177136	0.164167
ENSG00000023909	GCLM	658.769	-0.0197283	5.62412	0.0177149	0.164167
ENSG00000165995	CACNB2	10.4763	-0.0418376	5.6197	0.0177597	NA
ENSG00000165527	ARF6	2406.73	-0.00674897	5.61766	0.0177804	0.164518
ENSG00000158321	AUTS2	297.307	0.0213808	5.61686	0.0177885	0.164518
ENSG00000087448	KLHL42	834.474	0.00831388	5.61482	0.0178092	0.164518
ENSG00000268573		17.1049	0.0196554	5.61463	0.0178111	NA
ENSG00000101413	RPRD1B	646.72	0.0135477	5.61459	0.0178116	0.164518
ENSG00000217930	PAM16	378.882	-0.0108096	5.61368	0.0178208	0.164518
ENSG00000165046	LETM2	137.788	-0.0158631	5.61365	0.0178211	0.164518
ENSG00000164050	PLXNB1	1975.89	0.0135343	5.60975	0.0178608	0.164701
ENSG00000227766		28.4951	-0.0374014	5.60923	0.0178661	0.164701
ENSG00000204397	CARD16	79.6552	-0.0266867	5.60628	0.0178962	0.164701
ENSG00000163053	SLC16A14	47.6293	-0.0382488	5.60559	0.0179033	0.164701
ENSG00000242588		80.4135	0.0196001	5.60547	0.0179045	0.164701
ENSG00000170325	PRDM10	270.267	0.0107749	5.60498	0.0179095	0.164701
ENSG00000157193	LRP8	836.889	-0.017753	5.60039	0.0179564	0.165028
ENSG00000127554	GFER	597.369	-0.00788334	5.59707	0.0179906	0.165236
ENSG00000147082	CCNB3	12.1033	0.0231363	5.59696	0.0179917	NA
ENSG00000260793		50.8817	0.0277175	5.59293	0.0180331	0.165375
ENSG00000120992	LYPLA1	554.993	0.0119595	5.5916	0.0180468	0.165375
ENSG00000141556	TBCD	1555.27	-0.00687271	5.5912	0.0180509	0.165375
ENSG00000008018	PSMB1	3215.25	-0.00673611	5.59114	0.0180516	0.165375
ENSG00000168014	C2CD3	1150.59	0.0155974	5.58491	0.0181159	0.165859
ENSG00000137507	LRRC32	3634.08	0.0246096	5.5801	0.0181657	0.165949
ENSG00000100056	ESS2	575.337	-0.00720665	5.5786	0.0181812	0.165949
ENSG00000144792	ZNF660	35.7647	0.0257141	5.57852	0.0181821	0.165949
ENSG00000065361	ERBB3	31.8574	0.0382366	5.57817	0.0181857	0.165949
ENSG00000251085		34.1705	0.0262267	5.57696	0.0181983	0.165949
ENSG00000196230	TUBB	31760.7	-0.0132724	5.57528	0.0182158	0.165949
ENSG00000086065	CHMP5	1268.47	-0.0060672	5.57521	0.0182165	0.165949
ENSG00000180096	SEPTIN1	51.9176	-0.0195588	5.57247	0.018245	0.165949
ENSG00000152422	XRCC4	621.804	0.037229	5.57051	0.0182655	0.165949
ENSG00000118217	ATF6	2102.51	-0.00875151	5.56997	0.018271	0.165949
ENSG00000013392	RWDD2A	240.405	0.00907581	5.56864	0.018285	0.165949
ENSG00000234277	LINC01641	37.0265	-0.025228	5.56809	0.0182907	0.165949
ENSG00000234814	SVIL2P	13.1248	-0.0501544	5.56786	0.0182931	NA
ENSG00000123600	METTL8	340.415	-0.00976916	5.56731	0.0182989	0.165949
ENSG00000126214	KLC1	3669.34	-0.00795291	5.56711	0.0183009	0.165949
ENSG00000159231	CBR3	175.681	-0.0227387	5.56635	0.0183088	0.165949
ENSG00000105258	POLR2I	447.608	-0.0101265	5.56628	0.0183097	0.165949
ENSG00000186376	ZNF75D	207.264	0.00992364	5.56111	0.0183638	0.166241
ENSG00000115561	CHMP3	2353.01	-0.00616405	5.561	0.0183649	0.166241
ENSG00000061455	PRDM6	80.1239	0.0358868	5.55942	0.0183815	0.166286
ENSG00000236287	ZBED5	533.985	0.00763139	5.55331	0.0184457	0.166669
ENSG00000142192	APP	49713.7	0.0169976	5.5532	0.0184469	0.166669
ENSG00000013364	MVP	10116.2	-0.00982118	5.54509	0.0185326	0.167257
ENSG00000275066	SYNRG	1059.88	0.00766031	5.54485	0.0185351	0.167257
ENSG00000154146	NRGN	45.2494	-0.044329	5.54302	0.0185546	0.167327
ENSG00000107957	SH3PXD2A	12849.1	0.0196223	5.54189	0.0185665	0.16733
ENSG00000145911	N4BP3	23.591	-0.0369754	5.53819	0.0186058	0.16758
ENSG00000232035		14.5326	-0.066153	5.53748	0.0186134	NA
ENSG00000141076	UTP4	1149.55	-0.00737457	5.53487	0.0186412	0.167775
ENSG00000044446	PHKA2	455.606	0.00675353	5.53398	0.0186507	0.167775
ENSG00000261069		48.4177	0.0235604	5.53126	0.0186796	0.167931
ENSG00000171729	TMEM51	377.159	-0.0169666	5.52799	0.0187146	0.16814
ENSG00000143033	MTF2	241.37	0.00910306	5.52664	0.018729	0.168165
ENSG00000253508		11.1648	0.0357572	5.52542	0.0187421	NA
ENSG00000223705	NSUN5P1	998.584	0.016589	5.52408	0.0187564	0.16822
ENSG00000184384	MAML2	1565.9	0.0157021	5.5239	0.0187584	0.16822
ENSG00000174695	TMEM167A	2160.74	0.0121625	5.52164	0.0187826	0.168325
ENSG00000156928	MALSU1	425.021	-0.00643965	5.51988	0.0188015	0.168325
ENSG00000205544	TMEM256	440.815	-0.011432	5.51954	0.0188052	0.168325
ENSG00000197653	DNAH10	34.0232	-0.0620782	5.51702	0.0188323	0.168462
ENSG00000100426	ZBED4	874.093	0.00720623	5.51595	0.0188439	0.168462
ENSG00000137575	SDCBP	2815.4	-0.0124577	5.50337	0.0189798	0.169538
ENSG00000135917	SLC19A3	19.7148	0.0284349	5.50324	0.0189812	NA
ENSG00000175756	AURKAIP1	1862.64	-0.00847332	5.5018	0.018997	0.169538
ENSG00000132530	XAF1	728.184	-0.0286327	5.50157	0.0189994	0.169538
ENSG00000179091	CYC1	1828.32	-0.00829496	5.49652	0.0190544	0.169874
ENSG00000142002	DPP9	3120.54	-0.00860304	5.49367	0.0190855	0.169874
ENSG00000263327	TAPT1-AS1	43.0642	0.0141519	5.49265	0.0190965	0.169874
ENSG00000196141	SPATS2L	2691.78	-0.0104652	5.4925	0.0190982	0.169874
ENSG00000015532	XYLT2	2900.54	-0.00986127	5.49206	0.019103	0.169874
ENSG00000268350	FAM156A	997.732	0.0140038	5.49163	0.0191078	0.169874
ENSG00000197312	DDI2	653.212	0.00959536	5.48273	0.0192052	0.170635
ENSG00000143198	MGST3	2087.86	-0.00944717	5.48079	0.0192265	0.170645
ENSG00000015568	RGPD5	303.232	0.0477343	5.48049	0.0192299	0.170645
ENSG00000100228	RAB36	245.497	-0.0136103	5.47561	0.0192836	0.170933
ENSG00000166860	ZBTB39	220.985	0.00862696	5.47538	0.0192861	0.170933
ENSG00000101193	GID8	1073.88	0.00490777	5.46959	0.0193502	0.171338
ENSG00000197496	SLC2A10	1583.15	0.0109164	5.46834	0.019364	0.171338
ENSG00000033867	SLC4A7	515.691	-0.019209	5.46803	0.0193674	0.171338
ENSG00000167981	ZNF597	101.147	0.0135443	5.46331	0.0194198	0.171697
ENSG00000087191	PSMC5	2708.67	-0.00722091	5.45957	0.0194614	0.171818
ENSG00000147059	SPIN2A	21.7074	0.0226118	5.45893	0.0194685	0.171818
ENSG00000279233		70.9053	0.028673	5.45886	0.0194693	0.171818
ENSG00000169379	ARL13B	148.755	0.0105269	5.45643	0.0194965	0.171863
ENSG00000178802	MPI	631.45	-0.00913092	5.45393	0.0195243	0.171863
ENSG00000273373	SLC16A4-AS1	23.1857	0.0314196	5.45351	0.019529	0.171863
ENSG00000169230	PRELID1	3550.09	-0.00843148	5.45316	0.019533	0.171863
ENSG00000109686	SH3D19	1913.63	0.015089	5.45239	0.0195415	0.171863
ENSG00000126001	CEP250	1191.38	-0.0141097	5.45201	0.0195458	0.171863
ENSG00000243406	MRPS31P5	96.3368	0.01232	5.45023	0.0195657	0.171933
ENSG00000204147	ASAH2B	131.525	-0.0120086	5.44822	0.0195882	0.172026
ENSG00000137261	KIAA0319	10.3982	-0.0350508	5.44779	0.0195931	NA
ENSG00000108950	FAM20A	77.7227	0.0730167	5.44545	0.0196194	0.172093
ENSG00000198625	MDM4	614.166	0.00996134	5.44542	0.0196197	0.172093
ENSG00000061656	SPAG4	53.4084	-0.0164474	5.43974	0.0196836	0.172549
ENSG00000115226	FNDC4	364.585	-0.0156528	5.42993	0.0197945	0.173139
ENSG00000280614		205.081	-0.0272258	5.42953	0.019799	0.173139
ENSG00000280800		205.081	-0.0272258	5.42953	0.019799	0.173139
ENSG00000281181		205.081	-0.0272258	5.42953	0.019799	0.173139
ENSG00000163131	CTSS	52.5028	-0.0529905	5.42599	0.0198392	0.17327
ENSG00000163577	EIF5A2	302.601	-0.0160101	5.42554	0.0198443	0.17327
ENSG00000126524	SBDS	3278.01	-0.00743651	5.42436	0.0198577	0.17327
ENSG00000272975	MYHAS	37.6955	0.0323354	5.42398	0.019862	0.17327
ENSG00000198707	CEP290	525.019	-0.0148547	5.42194	0.0198853	0.173368
ENSG00000100628	ASB2	36.5409	-0.0517219	5.41974	0.0199103	0.173481
ENSG00000126267	COX6B1	2630.76	-0.00709649	5.4169	0.0199428	0.173531
ENSG00000184481	FOXO4	241.336	0.0124629	5.41627	0.0199499	0.173531
ENSG00000154723	ATP5PF	1615.21	-0.0061787	5.41608	0.0199521	0.173531
ENSG00000163214	DHX57	665.858	-0.00575248	5.41425	0.019973	0.173548
ENSG00000235703	EOLA2-DT	40.6015	0.0223164	5.4137	0.0199794	0.173548
ENSG00000248503	C4orf46P2	18.788	0.0174938	5.41295	0.0199879	NA
ENSG00000142102	PGGHG	936.459	0.0156634	5.41276	0.0199901	0.173548
ENSG00000158019	BABAM2	691.789	-0.00770046	5.41163	0.020003	0.173556
ENSG00000118680	MYL12B	9329.89	-0.00710736	5.40881	0.0200354	0.173699
ENSG00000263002	ZNF234	224.1	0.0101418	5.40759	0.0200494	0.173699
ENSG00000042980	ADAM28	19.2401	0.062647	5.40728	0.0200529	NA
ENSG00000012048	BRCA1	120.345	-0.0182636	5.40704	0.0200557	0.173699
ENSG00000078668	VDAC3	1099.29	-0.00772757	5.40355	0.0200958	0.173936
ENSG00000253161	LINC01605	153.133	-0.0220944	5.40257	0.0201071	0.173936
ENSG00000259820	MIR30DHG	14.1101	0.0291053	5.39837	0.0201555	NA
ENSG00000113721	PDGFRB	6474.26	0.0182595	5.39746	0.0201661	0.174342
ENSG00000173227	SYT12	13.0968	-0.0520567	5.39271	0.020221	NA
ENSG00000105613	MAST1	14.7921	-0.0223771	5.39039	0.020248	NA
ENSG00000117586	TNFSF4	157.942	-0.040078	5.38783	0.0202777	0.175168
ENSG00000221968	FADS3	3896.68	-0.0184536	5.38689	0.0202886	0.175168
ENSG00000125912	NCLN	4598.04	-0.00941717	5.38404	0.0203218	0.175168
ENSG00000106261	ZKSCAN1	1990.23	0.00806677	5.38351	0.0203279	0.175168
ENSG00000188026	RILPL1	820.527	-0.00699505	5.38319	0.0203317	0.175168
ENSG00000183011	NAA38	937.657	-0.00852102	5.38295	0.0203345	0.175168
ENSG00000110200	ANAPC15	554.618	-0.00928334	5.37632	0.0204119	0.175705
ENSG00000228630	HOTAIR	345.174	0.0361569	5.37521	0.0204249	0.175705
ENSG00000099203	TMED1	1037.23	-0.00917049	5.37419	0.0204368	0.175705
ENSG00000151718	WWC2	1729.99	0.0144931	5.37345	0.0204455	0.175705
ENSG00000274253		15.844	0.0478431	5.36358	0.0205615	NA
ENSG00000136451	VEZF1	906.141	0.00832743	5.36294	0.020569	0.176661
ENSG00000143458	GABPB2	257.482	0.0091217	5.3615	0.0205861	0.176702
ENSG00000084623	EIF3I	4494.86	-0.00874535	5.36005	0.0206031	0.176711
ENSG00000162913	OBSCN-AS1	91.6277	0.0237174	5.35934	0.0206116	0.176711
ENSG00000178202	POGLUT3	1627.49	0.0154285	5.35628	0.0206477	0.176912
ENSG00000125686	MED1	1172.31	0.00633601	5.35529	0.0206595	0.176912
ENSG00000105379	ETFB	980.267	-0.00627577	5.35423	0.020672	0.176914
ENSG00000196814	MVB12B	414.385	0.0103033	5.3515	0.0207045	0.177086
ENSG00000103241	FOXF1	832.993	-0.0289205	5.35026	0.0207192	0.177106
ENSG00000249406		27.7648	0.0252803	5.34924	0.0207313	0.177106
ENSG00000142611	PRDM16	46.2305	0.055391	5.34733	0.020754	0.177195
ENSG00000123240	OPTN	5257.53	-0.0124651	5.34455	0.0207871	0.177273
ENSG00000203950	RTL8A	1385.64	-0.0099097	5.34403	0.0207933	0.177273
ENSG00000253710	ALG11	297.951	0.010244	5.34314	0.0208039	0.177273
ENSG00000205352	PRR13	2491.52	-0.00757092	5.34245	0.0208122	0.177273
ENSG00000156110	ADK	455.433	-0.0112953	5.33886	0.0208551	0.177533
ENSG00000260807	CEROX1	39.2704	0.0281532	5.33719	0.0208752	0.177599
ENSG00000109920	FNBP4	1700.48	0.00835132	5.33436	0.020909	0.177782
ENSG00000124743	KLHL31	15.6577	0.0319949	5.33266	0.0209295	NA
ENSG00000279753		34.6533	-0.0263984	5.33254	0.0209309	0.177863
ENSG00000147316	MCPH1	320.239	0.0067111	5.33132	0.0209455	0.177883
ENSG00000146426	TIAM2	368.721	0.0150032	5.32501	0.0210215	0.178423
ENSG00000168906	MAT2A	4351.45	0.00858814	5.32243	0.0210527	0.178583
ENSG00000071859	FAM50A	3119.75	-0.00582106	5.31822	0.0211036	0.178889
ENSG00000103202	NME4	4937.87	-0.00992789	5.31695	0.0211189	0.178889
ENSG00000105364	MRPL4	1448.31	-0.00779679	5.31637	0.021126	0.178889
ENSG00000187479	C11orf96	32.0823	-0.0613945	5.31207	0.0211781	0.179163
ENSG00000165675	ENOX2	243.015	0.00801013	5.31082	0.0211934	0.179163
ENSG00000196418	ZNF124	70.9457	0.0145477	5.31064	0.0211956	0.179163
ENSG00000164400	CSF2	26.9929	-0.117098	5.30931	0.0212118	0.179195
ENSG00000267365	KCNJ2-AS1	10.5704	-0.047089	5.30857	0.0212208	NA
ENSG00000100320	RBFOX2	4258.19	0.00636117	5.30782	0.02123	0.179243
ENSG00000177731	FLII	6201.43	-0.00631406	5.30269	0.0212925	0.179666
ENSG00000086991	NOX4	230.296	0.0372741	5.30005	0.0213248	0.179735
ENSG00000111653	ING4	365.435	0.00755595	5.29945	0.0213322	0.179735
ENSG00000151632	AKR1C2	36.7675	-0.0392263	5.29833	0.0213459	0.179735
ENSG00000168118	RAB4A	706.404	0.00626697	5.29796	0.0213504	0.179735
ENSG00000011638	LDAF1	716.047	-0.0151119	5.29587	0.0213761	0.179846
ENSG00000136840	ST6GALNAC4	848.706	-0.0117305	5.2921	0.0214224	0.180131
ENSG00000245648	KLRK1-AS1	23.8773	0.0317379	5.29066	0.0214401	0.180174
ENSG00000197568	HHLA3	133.405	-0.0137412	5.28965	0.0214525	0.180174
ENSG00000179195	ZNF664	1713.61	0.00759374	5.28539	0.021505	0.180498
ENSG00000166343	MSS51	32.7964	0.0204824	5.2833	0.021531	0.180498
ENSG00000182983	ZNF662	65.6122	0.0294918	5.2827	0.0215384	0.180498
ENSG00000168672	LRATD2	1495.4	0.0379512	5.28247	0.0215411	0.180498
ENSG00000089335	ZNF302	399.916	0.00932253	5.28084	0.0215613	0.180537
ENSG00000163735	CXCL5	363.175	-0.0544143	5.28008	0.0215708	0.180537
ENSG00000185633	NDUFA4L2	337.68	-0.034706	5.27764	0.0216011	0.180668
ENSG00000140265	ZSCAN29	462.958	0.00697956	5.27679	0.0216115	0.180668
ENSG00000128973	CLN6	645.717	-0.0116971	5.27532	0.0216298	0.180716
ENSG00000146112	PPP1R18	6692.41	-0.0105816	5.27399	0.0216463	0.180724
ENSG00000164197	RNF180	90.909	0.0231083	5.27234	0.0216669	0.180724
ENSG00000112655	PTK7	13004.9	0.0162611	5.27222	0.0216683	0.180724
ENSG00000142655	PEX14	757.974	-0.00577585	5.27061	0.0216884	0.180787
ENSG00000134363	FST	2301.78	-0.0332332	5.2677	0.0217247	0.180985
ENSG00000101096	NFATC2	20.2424	-0.0364693	5.26768	0.021725	NA
ENSG00000148143	ZNF462	658.168	0.0129154	5.2623	0.0217923	0.181443
ENSG00000126249	PDCD2L	90.051	-0.0137262	5.2596	0.0218261	0.181546
ENSG00000162946	DISC1	206.348	0.0132485	5.25841	0.021841	0.181546
ENSG00000005059	MCUB	139.374	-0.0175024	5.2583	0.0218423	0.181546
ENSG00000196511	TPK1	62.0202	-0.0186424	5.25565	0.0218757	0.181718
ENSG00000151502	VPS26B	1891.5	0.00484738	5.25347	0.021903	0.18184
ENSG00000169962	TAS1R3	12.344	-0.0319986	5.25244	0.0219161	NA
ENSG00000214050	FBXO16	11.645	0.0425217	5.2517	0.0219253	NA
ENSG00000120265	PCMT1	1193.31	-0.00626209	5.24994	0.0219475	0.182068
ENSG00000103148	NPRL3	1390.98	-0.00898739	5.24929	0.0219557	0.182068
ENSG00000105701	FKBP8	8345.85	-0.00641323	5.24717	0.0219825	0.182131
ENSG00000132382	MYBBP1A	3065.15	-0.00792577	5.24617	0.0219952	0.182131
ENSG00000101986	ABCD1	1100.07	-0.00735523	5.24451	0.0220161	0.182131
ENSG00000256061	DNAAF4	46.0798	-0.0174709	5.2439	0.0220238	0.182131
ENSG00000076604	TRAF4	1749.48	0.00867007	5.2437	0.0220263	0.182131
ENSG00000177595	PIDD1	1071.3	0.0137124	5.24195	0.0220486	0.18221
ENSG00000092010	PSME1	1341.94	-0.0106707	5.24001	0.0220731	0.182308
ENSG00000135253	KCP	18.7827	-0.0401465	5.23886	0.0220877	NA
ENSG00000132170	PPARG	157.202	-0.0298161	5.23044	0.0221949	0.183169
ENSG00000179335	CLK3	1227.11	-0.00606536	5.22984	0.0222026	0.183169
ENSG00000145375	SPATA5	140.057	0.00990931	5.22882	0.0222156	0.183171
ENSG00000263873	THY1-AS1	71.8667	-0.0290437	5.22514	0.0222627	0.183337
ENSG00000117069	ST6GALNAC5	3178.67	0.0174648	5.22494	0.0222653	0.183337
ENSG00000272941		11.8461	-0.0486583	5.22472	0.0222681	NA
ENSG00000100865	CINP	601.898	-0.00772833	5.2235	0.0222836	0.183337
ENSG00000173660	UQCRH	1943.81	-0.00710937	5.22327	0.0222866	0.183337
ENSG00000247556	OIP5-AS1	1077.87	0.0113151	5.21933	0.0223371	0.183648
ENSG00000182718	ANXA2	73671.2	-0.010103	5.2177	0.0223581	0.183716
ENSG00000251003	ZFPM2-AS1	8.96577	-0.0652846	5.21725	0.0223639	NA
ENSG00000165304	MELK	245.102	-0.0216698	5.21582	0.0223823	0.18381
ENSG00000146938	NLGN4X	19.5155	-0.0901141	5.21528	0.0223893	NA
ENSG00000165609	NUDT5	1119.94	0.00572798	5.21177	0.0224345	0.184134
ENSG00000076716	GPC4	1604.85	0.0408115	5.2097	0.0224612	0.184248
ENSG00000123191	ATP7B	742.667	0.0237439	5.20486	0.0225238	0.184657
ENSG00000178665	ZNF713	49.0678	0.0137533	5.20346	0.0225419	0.1847
ENSG00000165661	QSOX2	1070.98	-0.0105302	5.20049	0.0225805	0.18482
ENSG00000102038	SMARCA1	2375.89	0.00777567	5.20036	0.0225822	0.18482
ENSG00000145936	KCNMB1	17.2214	-0.051222	5.19855	0.0226057	NA
ENSG00000176485	PLAAT3	219.188	-0.0284507	5.19678	0.0226287	0.185096
ENSG00000169567	HINT1	3297.85	-0.00702395	5.19163	0.0226959	0.185447
ENSG00000142303	ADAMTS10	410.983	0.0301968	5.19117	0.0227019	0.185447
ENSG00000147601	TERF1	581.408	0.00797938	5.18893	0.0227312	0.185447
ENSG00000133624	ZNF767P	241.88	0.012261	5.18854	0.0227363	0.185447
ENSG00000197818	SLC9A8	653.649	-0.0120931	5.18653	0.0227626	0.185447
ENSG00000121058	COIL	304.088	0.00558107	5.18433	0.0227914	0.185447
ENSG00000145029	NICN1	172.94	0.0147279	5.18394	0.0227966	0.185447
ENSG00000258643	BCL2L2-PABPN1	198.314	0.0214694	5.18384	0.0227978	0.185447
ENSG00000172663	TMEM134	594.144	-0.00631045	5.18316	0.0228068	0.185447
ENSG00000164970	FAM219A	1079.24	-0.00866677	5.18304	0.0228084	0.185447
ENSG00000156411	ATP5MJ	1344.25	-0.00700489	5.18269	0.0228129	0.185447
ENSG00000143314	MRPL24	903.538	-0.0111936	5.181	0.0228352	0.185448
ENSG00000104825	NFKBIB	748.842	-0.00802079	5.18072	0.0228388	0.185448
ENSG00000145901	TNIP1	4784.43	-0.0133004	5.17948	0.0228551	0.185476
ENSG00000107404	DVL1	2166.71	-0.00873298	5.1754	0.0229089	0.185641
ENSG00000183666	GUSBP1	100.994	-0.011671	5.17512	0.0229127	0.185641
ENSG00000169599	NFU1	551.647	-0.00864916	5.17486	0.022916	0.185641
ENSG00000138496	PARP9	436.371	-0.0227337	5.17305	0.0229399	0.185641
ENSG00000118454	ANKRD13C	519.529	0.00845041	5.1724	0.0229484	0.185641
ENSG00000160310	PRMT2	2354.17	0.00542274	5.17136	0.0229622	0.185641
ENSG00000103642	LACTB	1289.12	-0.0121109	5.17067	0.0229714	0.185641
ENSG00000160325	CACFD1	325.263	0.0125087	5.17014	0.0229784	0.185641
ENSG00000167377	ZNF23	300.646	-0.0094516	5.16834	0.0230021	0.185729
ENSG00000131732	ZCCHC9	449.871	-0.00775895	5.16651	0.0230265	0.185739
ENSG00000082438	COBLL1	1260.61	-0.0200056	5.1662	0.0230305	0.185739
ENSG00000248593	DSTNP2	55.402	-0.0101917	5.16502	0.0230461	0.185739
ENSG00000164818	DNAAF5	845.415	-0.0075343	5.16437	0.0230549	0.185739
ENSG00000120860	WASHC3	602.427	-0.00771318	5.15925	0.0231228	0.186149
ENSG00000175166	PSMD2	9922.37	-0.00837624	5.1586	0.0231315	0.186149
ENSG00000168477	TNXB	107.561	-0.0347362	5.15684	0.023155	0.186234
ENSG00000104147	OIP5	15.5433	-0.0459859	5.15614	0.0231643	NA
ENSG00000152049	KCNE4	2026.96	0.0291926	5.15579	0.0231691	0.186243
ENSG00000108387	SEPTIN4	56.4803	0.033055	5.14968	0.0232507	0.186763
ENSG00000233476	EEF1A1P6	104.54	0.0144271	5.14901	0.0232597	0.186763
ENSG00000270804		100.674	0.0155017	5.14503	0.023313	0.187078
ENSG00000137770	CTDSPL2	305.304	0.0096061	5.14416	0.0233247	0.187078
ENSG00000143614	GATAD2B	861.666	0.00690698	5.14255	0.0233463	0.187146
ENSG00000100599	RIN3	1098.36	-0.00921483	5.14007	0.0233797	0.187298
ENSG00000061273	HDAC7	4202.78	0.00715589	5.13922	0.0233912	0.187298
ENSG00000109861	CTSC	1030.51	-0.0169736	5.13742	0.0234155	0.187348
ENSG00000198246	SLC29A3	170.639	0.0131612	5.13683	0.0234233	0.187348
ENSG00000234840	LINC01239	50.2194	0.0391967	5.13402	0.0234613	0.187547
ENSG00000185513	L3MBTL1	123.183	0.0167269	5.1326	0.0234806	0.187597
ENSG00000142197	DOP1B	526.19	-0.0143981	5.13059	0.0235078	0.187711
ENSG00000162994	CLHC1	58.3177	0.0164115	5.12909	0.0235281	0.187769
ENSG00000249013	FTH1P21	10.7913	-0.0349087	5.12863	0.0235343	NA
ENSG00000235437	LINC01278	672.156	0.00708734	5.12784	0.023545	0.187776
ENSG00000101247	NDUFAF5	191.669	-0.00728675	5.12711	0.023555	0.187776
ENSG00000172590	MRPL52	1170.58	-0.00896829	5.12528	0.0235798	0.187836
ENSG00000134744	TUT4	866.015	0.00560389	5.12371	0.0236011	0.187836
ENSG00000198814	GK	241.954	-0.0239065	5.12368	0.0236015	0.187836
ENSG00000162129	CLPB	294.636	-0.00778783	5.12228	0.0236205	0.187856
ENSG00000145241	CENPC	212.984	0.00933954	5.12158	0.0236301	0.187856
ENSG00000075702	WDR62	172.035	-0.0238343	5.11939	0.02366	0.18799
ENSG00000123213	NLN	855.615	-0.00920039	5.1178	0.0236816	0.188054
ENSG00000137628	DDX60	151.947	-0.0278944	5.11606	0.0237054	0.188054
ENSG00000173085	COQ2	177.855	-0.0105769	5.11566	0.0237108	0.188054
ENSG00000160957	RECQL4	217.916	-0.0231336	5.11497	0.0237202	0.188054
ENSG00000172009	THOP1	1216.28	-0.00933753	5.11104	0.0237741	0.188347
ENSG00000160712	IL6R	52.4509	-0.0243503	5.11037	0.0237833	0.188347
ENSG00000137070	IL11RA	406.145	0.0115003	5.10902	0.0238018	0.188391
ENSG00000021574	SPAST	319.823	0.011617	5.10758	0.0238216	0.188444
ENSG00000093009	CDC45	83.5841	-0.0375194	5.10603	0.0238428	0.188509
ENSG00000170855	TRIAP1	465.207	0.00956177	5.10427	0.023867	0.188596
ENSG00000167721	TSR1	1653.86	-0.00614034	5.10198	0.0238985	0.188656
ENSG00000138395	CDK15	217.722	0.0186589	5.10183	0.0239006	0.188656
ENSG00000164574	GALNT10	6814.87	0.0164091	5.10054	0.0239184	0.188686
ENSG00000139793	MBNL2	3360.87	0.01707	5.09965	0.0239307	0.188686
ENSG00000265763	ZNF488	11.1921	0.0353993	5.09876	0.0239429	NA
ENSG00000136908	DPM2	873.518	-0.00623747	5.09843	0.0239475	0.188716
ENSG00000152763	DNAI4	64.2311	-0.0161994	5.09632	0.0239766	0.188842
ENSG00000121152	NCAPH	93.9816	-0.0403209	5.08942	0.0240722	0.189491
ENSG00000004779	NDUFAB1	921.651	-0.00769228	5.08758	0.0240978	0.18954
ENSG00000104964	TLE5	10256.5	-0.00658331	5.08708	0.0241047	0.18954
ENSG00000178409	BEND3	156.187	0.01024	5.08228	0.0241715	0.189963
ENSG00000136925	TSTD2	449.17	0.00593265	5.07916	0.0242151	0.190201
ENSG00000119778	ATAD2B	166.356	0.0101198	5.07605	0.0242586	0.190331
ENSG00000268858		354.99	-0.0130528	5.07226	0.0243117	0.190331
ENSG00000140534	TICRR	64.5388	-0.0357796	5.07153	0.0243219	0.190331
ENSG00000164692	COL1A2	344621	0.0191317	5.071	0.0243293	0.190331
ENSG00000198815	FOXJ3	1098.71	0.0055252	5.0708	0.0243321	0.190331
ENSG00000156261	CCT8	3866.26	-0.00557931	5.07011	0.0243419	0.190331
ENSG00000151332	MBIP	233.354	0.00814252	5.06909	0.0243561	0.190331
ENSG00000148200	NR6A1	19.5688	-0.0197559	5.06894	0.0243583	NA
ENSG00000141519	CCDC40	117.89	0.0200392	5.06854	0.0243638	0.190331
ENSG00000255150	EID3	31.2549	-0.0262152	5.06846	0.0243651	0.190331
ENSG00000154217	PITPNC1	179.231	0.0125059	5.0664	0.0243939	0.190331
ENSG00000233117	LINC00702	42.3415	-0.0261088	5.06574	0.0244033	0.190331
ENSG00000106028	SSBP1	1531.11	-0.00782009	5.0653	0.0244095	0.190331
ENSG00000166147	FBN1	37768	0.0167886	5.06448	0.0244211	0.190331
ENSG00000060971	ACAA1	1089.84	-0.0070291	5.0644	0.0244222	0.190331
ENSG00000188368	PRR19	63.9538	-0.0124805	5.06149	0.0244632	0.190331
ENSG00000197779	ZNF81	101.073	0.0136743	5.05643	0.0245348	0.190331
ENSG00000106554	CHCHD3	1291.46	-0.00653076	5.05458	0.024561	0.190331
ENSG00000153832	FBXO36	48.8212	-0.0142965	5.05254	0.0245898	0.190331
ENSG00000115844	DLX2	20.6108	0.0430312	5.05169	0.0246019	0.190331
ENSG00000067715	SYT1	320.179	-0.0181047	5.05163	0.0246027	0.190331
ENSG00000261167		23.9076	0.0171796	5.05115	0.0246096	0.190331
ENSG00000151208	DLG5	3066.77	0.00817962	5.05068	0.0246162	0.190331
ENSG00000101544	ADNP2	503.212	0.00777222	5.05041	0.0246201	0.190331
ENSG00000077044	DGKD	535.498	0.00813711	5.04958	0.024632	0.190331
ENSG00000149548	CCDC15	23.5398	-0.0243627	5.04897	0.0246406	0.190331
ENSG00000124067	SLC12A4	4149.68	0.00869232	5.0488	0.024643	0.190331
ENSG00000186162	CIDECP1	347.345	-0.00909369	5.04788	0.0246561	0.190331
ENSG00000125650	PSPN	95.7481	0.0145832	5.04757	0.0246605	0.190331
ENSG00000101452	DHX35	231.216	0.00759385	5.04752	0.0246612	0.190331
ENSG00000100031	GGT1	257.056	-0.0318186	5.04545	0.0246907	0.190331
ENSG00000159685	CHCHD6	327.989	-0.00812323	5.045	0.0246972	0.190331
ENSG00000156508	EEF1A1	215768	0.0089011	5.04305	0.0247249	0.190331
ENSG00000100418	DESI1	1665.66	-0.00721095	5.04273	0.0247295	0.190331
ENSG00000187498	COL4A1	77119.7	0.0240954	5.04268	0.0247303	0.190331
ENSG00000168610	STAT3	3839.63	0.0105373	5.04263	0.0247309	0.190331
ENSG00000154127	UBASH3B	906.485	-0.0119443	5.0426	0.0247313	0.190331
ENSG00000108883	EFTUD2	2163.75	-0.00612541	5.0425	0.0247327	0.190331
ENSG00000135441	BLOC1S1	696.054	-0.00741411	5.04162	0.0247453	0.190331
ENSG00000137267	TUBB2A	4165.98	-0.0162264	5.04157	0.0247461	0.190331
ENSG00000175806	MSRA	459.742	-0.0060312	5.03951	0.0247755	0.190456
ENSG00000169764	UGP2	4004.22	0.0119051	5.02524	0.0249805	0.191929
ENSG00000279605		35.2777	-0.0272292	5.0229	0.0250142	0.192086
ENSG00000141956	PRDM15	245.605	0.00921541	5.02195	0.025028	0.19209
ENSG00000204381	LAYN	1163.96	-0.0233907	5.00975	0.025205	0.193346
ENSG00000261716	H2BC20P	106.95	0.0193692	5.00686	0.0252471	0.193565
ENSG00000183023	SLC8A1	570.197	-0.0212385	5.00349	0.0252963	0.193838
ENSG00000213928	IRF9	925.297	-0.0148478	5.00258	0.0253095	0.193838
[truncated: 13,980 more rows]

## Sheet: Table S5
Table S5. Association of gene expression with FM% at 4-6 years of age
Ensembl Gene ID	Gene Symbol	Mean of Normalized Counts	Magnitude	Wald Statistic	p-value	FDR
ENSG00000225630	MTND2P28	986.089	0.144375	32.9094	9.66e-09	0.000154274
ENSG00000105664	COMP	194.516	0.101376	17.4831	2.9e-05	0.231581
ENSG00000173418	NAA20	834.315	-0.0146411	15.3976	8.71e-05	0.369122
ENSG00000183853	KIRREL1	8497.62	0.0203602	15.2858	9.24e-05	0.369122
ENSG00000163257	DCAF16	580.721	0.0139722	13.8563	0.000197331	0.378418
ENSG00000100354	TNRC6B	895.855	0.0159821	13.1988	0.000280126	0.378418
ENSG00000262209	PCDHGB3	134.886	0.0390349	13.0698	0.000300096	0.378418
ENSG00000158966	CACHD1	411.007	0.0378241	12.9909	0.000313007	0.378418
ENSG00000100201	DDX17	8009.03	0.0107106	12.979	0.000314997	0.378418
ENSG00000103489	XYLT1	4069.51	0.0431981	12.8859	0.000331061	0.378418
ENSG00000143222	UFC1	1589.51	-0.0126708	12.8419	0.000338938	0.378418
ENSG00000105429	MEGF8	4070.72	0.0147767	12.4753	0.000412359	0.378418
ENSG00000280206		48.8583	-0.0280535	12.4338	0.000421622	0.378418
ENSG00000177410	ZFAS1	1825.88	-0.0179491	12.1798	0.000483108	0.378418
ENSG00000265401		145.114	-0.0358497	12.0327	0.000522742	0.378418
ENSG00000135048	CEMIP2	3747.03	0.0218731	11.9981	0.000532537	0.378418
ENSG00000154736	ADAMTS5	248.104	0.0662417	11.9393	0.00054961	0.378418
ENSG00000106772	PRUNE2	391.352	0.0570986	11.9142	0.000557084	0.378418
ENSG00000215012	RTL10	617.65	0.0144419	11.7946	0.000594016	0.378418
ENSG00000140319	SRP14	5552.63	-0.0114474	11.7376	0.000612499	0.378418
ENSG00000124766	SOX4	1212.46	0.0297497	11.7169	0.000619355	0.378418
ENSG00000185955	SPACDR	12.1468	-0.0588779	11.6581	0.000639251	0.378418
ENSG00000011114	BTBD7	896.393	0.0142159	11.6315	0.000648455	0.378418
ENSG00000133048	CHI3L1	8813.7	0.0992484	11.492	0.000698979	0.378418
ENSG00000049540	ELN	46.8116	0.100767	11.4733	0.00070604	0.378418
ENSG00000167862	MRPL58	408.872	-0.0187074	11.4513	0.000714455	0.378418
ENSG00000197568	HHLA3	128.754	-0.0234704	11.4492	0.000715266	0.378418
ENSG00000154719	MRPL39	271.833	-0.0156871	11.2092	0.000813941	0.378418
ENSG00000184831	APOO	136.584	-0.0170468	11.124	0.000852186	0.378418
ENSG00000185722	ANKFY1	1802.53	0.0127406	11.0983	0.000864077	0.378418
ENSG00000109323	MANBA	5983.22	0.029973	11.0414	0.000891001	0.378418
ENSG00000169567	HINT1	3123.86	-0.0143054	10.969	0.000926492	0.378418
ENSG00000109063	MYH3	73.2	-0.0489525	10.9415	0.000940318	0.378418
ENSG00000129910	CDH15	31.8257	0.0622976	10.711	0.00106503	0.378418
ENSG00000271862		13.3588	0.0339883	10.555	0.00115877	0.378418
ENSG00000243678	NME2	9751.22	-0.0150997	10.5487	0.0011627	0.378418
ENSG00000180044	C3orf80	107.402	0.0658261	10.5343	0.00117179	0.378418
ENSG00000176046	NUPR1	5099.76	-0.0207238	10.4614	0.00121895	0.378418
ENSG00000114270	COL7A1	2551.9	0.0435193	10.3581	0.00128908	0.378418
ENSG00000112304	ACOT13	505.826	-0.0170644	10.3339	0.00130608	0.378418
ENSG00000135916	ITM2C	7958.02	0.0159232	10.333	0.00130671	0.378418
ENSG00000180198	RCC1	869.554	-0.017036	10.3283	0.00131006	0.378418
ENSG00000271533		62.147	0.030527	10.3095	0.00132347	0.378418
ENSG00000114956	DGUOK	875.925	-0.0159125	10.2853	0.00134098	0.378418
ENSG00000253731	PCDHGA6	237.046	0.0261069	10.2722	0.00135051	0.378418
ENSG00000205500	MAPRE3-AS1	19.5531	0.0308793	10.2679	0.00135362	0.378418
ENSG00000143093	STRIP1	983.937	0.00997153	10.2201	0.0013892	0.378418
ENSG00000182463	TSHZ2	36.3296	0.0882486	10.1595	0.00143557	0.378418
ENSG00000122034	GTF3A	1482.2	-0.0179781	10.1095	0.00147509	0.378418
ENSG00000125826	RBCK1	3319.97	-0.0147617	10.092	0.00148918	0.378418
ENSG00000087589	CASS4	27.8158	-0.0510523	10.0613	0.00151415	0.378418
ENSG00000065518	NDUFB4	1791.37	-0.0130354	9.98273	0.00158016	0.378418
ENSG00000078098	FAP	7210.22	0.0248463	9.92607	0.00162954	0.378418
ENSG00000138434	ITPRID2	3787.45	0.0266807	9.88685	0.00166464	0.378418
ENSG00000162493	PDPN	539.59	0.0961263	9.8441	0.00170378	0.378418
ENSG00000075131	TIPIN	106.875	-0.0174611	9.83035	0.00171656	0.378418
ENSG00000078319	PMS2P1	79.9468	-0.0181695	9.76556	0.00177811	0.378418
ENSG00000137801	THBS1	51977.9	0.0538691	9.74691	0.00179625	0.378418
ENSG00000104435	STMN2	588.398	0.0937735	9.7159	0.0018268	0.378418
ENSG00000116898	MRPS15	1175.93	-0.0150831	9.71569	0.00182702	0.378418
ENSG00000172301	COPRS	1217.3	-0.0206798	9.64581	0.00189784	0.378418
ENSG00000119401	TRIM32	801.861	0.0157977	9.59552	0.00195052	0.378418
ENSG00000283224		66.9084	0.0430598	9.55925	0.00198944	0.378418
ENSG00000269968		387.405	-0.0344302	9.53467	0.00201627	0.378418
ENSG00000143153	ATP1B1	756.746	0.0208782	9.52266	0.0020295	0.378418
ENSG00000257354	MIRLET7IHG	291.95	0.0221377	9.48821	0.00206796	0.378418
ENSG00000146425	DYNLT1	1116.62	-0.0134556	9.47048	0.00208804	0.378418
ENSG00000234741	GAS5	2305.34	-0.0190383	9.46043	0.00209952	0.378418
ENSG00000168769	TET2	278.563	0.0206731	9.41737	0.0021494	0.378418
ENSG00000197037	ZSCAN25	256.119	0.00914138	9.40915	0.00215905	0.378418
ENSG00000158258	CLSTN2	1058.64	0.084542	9.40292	0.00216641	0.378418
ENSG00000162825	NBPF20	854.426	0.0256898	9.40113	0.00216852	0.378418
ENSG00000100814	CCNB1IP1	627.007	-0.0157042	9.40018	0.00216964	0.378418
ENSG00000173480	ZNF417	119.352	0.025115	9.38436	0.00218845	0.378418
ENSG00000069020	MAST4	529.093	0.0207684	9.36682	0.00220949	0.378418
ENSG00000109919	MTCH2	2031.98	-0.00812601	9.34584	0.00223492	0.378418
ENSG00000113494	PRLR	30.1281	0.0522039	9.337	0.00224573	0.378418
ENSG00000042753	AP2S1	4236.86	-0.0135829	9.32251	0.00226356	0.378418
ENSG00000116096	SPR	563.988	-0.01274	9.30454	0.00228587	0.378418
ENSG00000129559	NEDD8	2895.79	-0.0120277	9.29664	0.00229574	0.378418
ENSG00000235174	RPL39P3	101.818	-0.030354	9.26273	0.00233864	0.378418
ENSG00000136810	TXN	3736.44	-0.0181721	9.25777	0.00234499	0.378418
ENSG00000134419	RPS15A	7136.98	-0.0157012	9.25058	0.00235421	0.378418
ENSG00000034510	TMSB10	39188.2	-0.021605	9.24002	0.00236783	0.378418
ENSG00000090621	PABPC4	5874.31	-0.0110243	9.23428	0.00237526	0.378418
ENSG00000113194	FAF2	2020.04	0.00911062	9.22627	0.00238567	0.378418
ENSG00000166689	PLEKHA7	250.025	0.0527234	9.19919	0.00242123	0.378418
ENSG00000221866	PLXNA4	107.066	0.0687543	9.195	0.00242677	0.378418
ENSG00000167476	JSRP1	36.0641	-0.0240279	9.1753	0.00245303	0.378418
ENSG00000123609	NMI	227.743	-0.0193951	9.16731	0.00246376	0.378418
ENSG00000023572	GLRX2	251.224	-0.0181656	9.15813	0.00247615	0.378418
ENSG00000166797	CIAO2A	409.793	-0.0104557	9.12511	0.00252125	0.378418
ENSG00000115541	HSPE1	1565.86	-0.014665	9.08316	0.00257974	0.378418
ENSG00000185219	ZNF445	636.463	0.0115327	9.08309	0.00257984	0.378418
ENSG00000108669	CYTH1	979.824	0.0190213	9.07555	0.0025905	0.378418
ENSG00000140526	ABHD2	1337.55	0.0179785	9.05755	0.00261612	0.378418
ENSG00000172428	COPS9	587.524	-0.0147086	9.04843	0.0026292	0.378418
ENSG00000065978	YBX1	22139.5	-0.0157972	9.03937	0.00264226	0.378418
ENSG00000166165	CKB	259.477	-0.0541136	9.02113	0.00266877	0.378418
ENSG00000075240	GRAMD4	458.093	0.0142177	9.00456	0.00269306	0.378418
ENSG00000181610	MRPS23	671.063	-0.00948733	9.00354	0.00269457	0.378418
ENSG00000038427	VCAN	28264.2	0.0318832	9.00022	0.00269947	0.378418
ENSG00000162961	DPY30	469.085	-0.0135685	8.98769	0.00271804	0.378418
ENSG00000167653	PSCA	9.28922	0.0499895	8.9797	0.00272995	0.378418
ENSG00000011028	MRC2	28566.8	0.0163234	8.94889	0.00277639	0.378418
ENSG00000133316	WDR74	578.969	-0.0142093	8.94069	0.00278888	0.378418
ENSG00000197728	RPS26	3550.56	-0.0240136	8.92711	0.00280969	0.378418
ENSG00000132963	POMP	2166.18	-0.0141347	8.90689	0.00284097	0.378418
ENSG00000106538	RARRES2	97.9448	0.0932443	8.90253	0.00284776	0.378418
ENSG00000083168	KAT6A	962.495	0.0136917	8.89469	0.00286001	0.378418
ENSG00000204767	INSYN2B	68.2842	0.0510658	8.89125	0.00286541	0.378418
ENSG00000112110	MRPL18	682.307	-0.0163257	8.86835	0.00290157	0.378418
ENSG00000223478	ZDHHC12-DT	16.5127	-0.0341817	8.86402	0.00290846	0.378418
ENSG00000065308	TRAM2	5673.24	0.012044	8.86256	0.00291079	0.378418
ENSG00000165323	FAT3	193.259	0.0480161	8.85316	0.00292582	0.378418
ENSG00000106615	RHEB	2493.83	-0.00858438	8.84521	0.00293859	0.378418
ENSG00000279605		32.7369	-0.0406221	8.82596	0.00296975	0.378418
ENSG00000213585	VDAC1	4979.71	-0.00806927	8.80994	0.00299594	0.378418
ENSG00000137133	HINT2	242.431	-0.0169348	8.78725	0.00303343	0.378418
ENSG00000175768	TOMM5	1354.35	-0.012518	8.77626	0.00305176	0.378418
ENSG00000170892	TSEN34	1149.43	-0.0109996	8.76925	0.00306351	0.378418
ENSG00000165113	GKAP1	32.4719	-0.0246456	8.72671	0.00313581	0.378418
ENSG00000116151	MORN1	117.956	0.0125655	8.71025	0.00316425	0.378418
ENSG00000164405	UQCRQ	1731.33	-0.0157263	8.70644	0.00317089	0.378418
ENSG00000169604	ANTXR1	11718.8	0.0292432	8.66229	0.00324862	0.378418
ENSG00000177954	RPS27	10884.5	-0.0126492	8.66138	0.00325024	0.378418
ENSG00000119421	NDUFA8	829.885	-0.0107115	8.65763	0.00325695	0.378418
ENSG00000104147	OIP5	15.8519	-0.0532235	8.6309	0.00330509	0.378418
ENSG00000104904	OAZ1	15289.2	-0.0132413	8.62566	0.00331461	0.378418
ENSG00000161955	TNFSF13	74.5743	-0.0201043	8.57541	0.00340733	0.378418
ENSG00000182768	NGRN	2845.96	-0.0111229	8.56496	0.00342695	0.378418
ENSG00000261732		46.6905	0.0286457	8.56334	0.00342999	0.378418
ENSG00000116906	GNPAT	817.722	-0.00847711	8.53004	0.00349332	0.378418
ENSG00000064309	CDON	131.007	0.0206455	8.52029	0.00351208	0.378418
ENSG00000178033	CALHM5	608.829	0.018648	8.49482	0.0035616	0.378418
ENSG00000065328	MCM10	61.3882	-0.0480496	8.43636	0.00367792	0.378418
ENSG00000127952	STYXL1	529.116	-0.0130265	8.42211	0.00370685	0.378418
ENSG00000231500	RPS18	19605.1	-0.0170883	8.42145	0.0037082	0.378418
ENSG00000174775	HRAS	1037.67	-0.0158936	8.41997	0.00371123	0.378418
ENSG00000070018	LRP6	900.977	0.0209572	8.40611	0.00373962	0.378418
ENSG00000262481	TMEM256-PLSCR3	19.7338	0.0352796	8.39138	0.00377005	0.378418
ENSG00000141428	C18orf21	252.469	-0.0118277	8.38297	0.00378753	0.378418
ENSG00000143977	SNRPG	870.944	-0.0171087	8.35909	0.00383763	0.378418
ENSG00000196656		3432.02	-0.0232666	8.35678	0.00384251	0.378418
ENSG00000198795	ZNF521	266.432	0.0209662	8.33863	0.00388109	0.378418
ENSG00000140264	SERF2	11542.8	-0.0124461	8.32963	0.00390035	0.378418
ENSG00000248503	C4orf46P2	18.5728	0.0279891	8.32223	0.00391628	0.378418
ENSG00000065534	MYLK	5677.74	0.0304706	8.3131	0.00393601	0.378418
ENSG00000163521	GLB1L	293.812	0.0233569	8.31134	0.00393983	0.378418
ENSG00000047056	WDR37	840.253	0.0148536	8.29602	0.0039732	0.378418
ENSG00000074755	ZZEF1	1668.13	0.0103633	8.27753	0.00401388	0.378418
ENSG00000131797	CLUHP3	121.325	0.019089	8.27165	0.00402689	0.378418
ENSG00000163513	TGFBR2	2488.34	0.0272711	8.263	0.00404612	0.378418
ENSG00000171530	TBCA	2228.45	-0.0123836	8.25667	0.00406026	0.378418
ENSG00000127184	COX7C	1474.59	-0.0130318	8.25059	0.00407387	0.378418
ENSG00000164032	H2AZ1	2251.57	-0.0139085	8.23789	0.00410247	0.378418
ENSG00000134291	TMEM106C	732.016	-0.0119448	8.23712	0.00410421	0.378418
ENSG00000171861	MRM3	209.779	-0.0109873	8.23023	0.00411982	0.378418
ENSG00000134779	TPGS2	2500.47	-0.0123181	8.22884	0.00412299	0.378418
ENSG00000116957		518.481	-0.0114199	8.22851	0.00412373	0.378418
ENSG00000213741	RPS29	3530.46	-0.013533	8.21001	0.00416599	0.378418
ENSG00000182545	RNASE10	62.6707	0.0218094	8.20802	0.00417056	0.378418
ENSG00000146802	TMEM168	379.271	0.0147536	8.17525	0.00424658	0.378418
ENSG00000162551	ALPL	60.9498	-0.0494007	8.15025	0.00430553	0.378418
ENSG00000258430		17.6849	-0.0278354	8.13268	0.00434744	0.378418
ENSG00000143499	SMYD2	648.207	-0.0105593	8.12925	0.00435566	0.378418
ENSG00000057657	PRDM1	90.3583	0.0484001	8.11728	0.00438453	0.378418
ENSG00000198258	UBL5	1641.88	-0.014107	8.10429	0.00441606	0.378418
ENSG00000279348		45.8161	0.0317859	8.09972	0.0044272	0.378418
ENSG00000090266	NDUFB2	920.993	-0.0141336	8.09613	0.00443598	0.378418
ENSG00000144711	IQSEC1	960.427	0.011221	8.08107	0.00447301	0.378418
ENSG00000169129	AFAP1L2	26.448	0.0756787	8.06485	0.00451323	0.378418
ENSG00000169020	ATP5ME	1271.89	-0.0154395	8.06004	0.00452522	0.378418
ENSG00000104671	DCTN6	629.765	-0.00756548	8.05468	0.00453863	0.378418
ENSG00000108582	CPD	2911.78	0.0230142	8.04389	0.00456574	0.378418
ENSG00000272701	MESTIT1	12.2572	0.0305317	8.04015	0.00457519	0.378418
ENSG00000008086	CDKL5	219.629	0.0177814	8.02791	0.0046062	0.378418
ENSG00000127922	SEM1	1187.86	-0.0144197	8.02414	0.00461579	0.378418
ENSG00000134369	NAV1	5532.89	0.0167986	8.02038	0.00462539	0.378418
ENSG00000224259	LINC01133	180.814	-0.05047	7.99528	0.00468994	0.378418
ENSG00000164530	PI16	109.223	-0.0810966	7.96128	0.00477887	0.378418
ENSG00000182871	COL18A1	9732.24	0.0218712	7.96064	0.00478055	0.378418
ENSG00000114554	PLXNA1	8090.62	0.0116941	7.9551	0.00479521	0.378418
ENSG00000166352	IFTAP	215.027	-0.0133502	7.93703	0.00484332	0.378418
ENSG00000131462	TUBG1	1344.21	-0.0122891	7.9323	0.00485599	0.378418
ENSG00000175970	UNC119B	963.356	0.0107164	7.9289	0.00486513	0.378418
ENSG00000198466	ZNF587	766.155	0.0177851	7.92825	0.00486688	0.378418
ENSG00000145781	COMMD10	218.891	-0.0130791	7.90039	0.00494241	0.378418
ENSG00000166224	SGPL1	1848.05	0.0161605	7.89982	0.00494396	0.378418
ENSG00000271816	BMS1P4	53.1693	0.0236606	7.89903	0.00494612	0.378418
ENSG00000087460	GNAS	28702.7	-0.0114448	7.88235	0.00499197	0.378418
ENSG00000178127	NDUFV2	1578.35	-0.0128912	7.87782	0.00500448	0.378418
ENSG00000151067	CACNA1C	467.737	0.0370792	7.87721	0.00500617	0.378418
ENSG00000154582	ELOC	1183.25	-0.00995484	7.87342	0.00501667	0.378418
ENSG00000008988	RPS20	12523.4	-0.0156455	7.86467	0.00504099	0.378418
ENSG00000068024	HDAC4	326.533	0.0110776	7.8566	0.00506354	0.378418
ENSG00000103707	MTFMT	272.552	-0.00782852	7.85521	0.00506745	0.378418
ENSG00000155850	SLC26A2	722.899	0.0274209	7.8475	0.00508909	0.378418
ENSG00000143590	EFNA3	30.4438	-0.022608	7.84236	0.0051036	0.378418
ENSG00000091732	ZC3HC1	350.019	-0.0101379	7.83258	0.00513128	0.378418
ENSG00000128944	KNSTRN	271.251	-0.0181579	7.8162	0.00517799	0.378418
ENSG00000258441	LINC00641	328.617	0.0242525	7.81005	0.00519566	0.378418
ENSG00000130520	LSM4	1614.71	-0.0138086	7.8012	0.00522115	0.378418
ENSG00000182158	CREB3L2	3860.83	0.012878	7.79095	0.00525087	0.378418
ENSG00000183098	GPC6	1814.33	0.036227	7.79013	0.00525324	0.378418
ENSG00000104517	UBR5	2024.18	0.0139048	7.77551	0.00529593	0.378418
ENSG00000163634	THOC7	717.624	-0.0124052	7.77389	0.00530067	0.378418
ENSG00000258938		89.5222	0.0158747	7.76116	0.00533818	0.378418
ENSG00000213077		13.9765	0.0512982	7.75938	0.00534342	0.378418
ENSG00000122642	FKBP9	11308	0.0131479	7.75503	0.00535632	0.378418
ENSG00000080503	SMARCA2	1310.04	0.0145665	7.75488	0.00535675	0.378418
ENSG00000114302	PRKAR2A	1510.18	0.0121586	7.74774	0.00537799	0.378418
ENSG00000254995	STX16-NPEPL1	15.8478	0.051352	7.74484	0.00538663	0.378418
ENSG00000119185	ITGB1BP1	1188.41	-0.0111112	7.74158	0.00539635	0.378418
ENSG00000134058	CDK7	832.212	-0.0101464	7.72877	0.00543476	0.378418
ENSG00000103742	IGDCC4	164.911	0.0562043	7.72297	0.00545227	0.378418
ENSG00000060656	PTPRU	1943.64	0.0220263	7.70075	0.00551979	0.378418
ENSG00000280474		18.9656	0.0257247	7.69878	0.00552582	0.378418
ENSG00000228510		10.8797	0.0442986	7.69321	0.0055429	0.378418
ENSG00000131845	ZNF304	222.534	0.012044	7.69094	0.00554987	0.378418
ENSG00000112695	COX7A2	1633.99	-0.0135617	7.68858	0.00555714	0.378418
ENSG00000112514	CUTA	3390.01	-0.0118343	7.67442	0.0056009	0.378418
ENSG00000119013	NDUFB3	702.066	-0.0116684	7.66446	0.00563192	0.378418
ENSG00000107949	BCCIP	887.389	-0.0117626	7.64311	0.00569895	0.378418
ENSG00000184083	FAM120C	188.549	0.0147965	7.63824	0.00571436	0.378418
ENSG00000072832	CRMP1	35.3824	-0.0738718	7.63817	0.0057146	0.378418
ENSG00000119720	NRDE2	325.807	0.00947382	7.63442	0.00572649	0.378418
ENSG00000102172	SMS	2534.68	-0.0129813	7.62743	0.00574872	0.378418
ENSG00000112306	RPS12	9497.41	-0.0149519	7.61779	0.00577953	0.378418
ENSG00000135966	TGFBRAP1	1637.09	0.0127951	7.60879	0.00580845	0.378418
ENSG00000165502	RPL36AL	2916.58	-0.0133723	7.6035	0.0058255	0.378418
ENSG00000104976	SNAPC2	789.336	-0.0145378	7.59048	0.00586774	0.378418
ENSG00000042980	ADAM28	21.9981	0.0818004	7.58286	0.0058926	0.378418
ENSG00000135945	REV1	525.311	0.00813395	7.5788	0.00590586	0.378418
ENSG00000154723	ATP5PF	1525.65	-0.0109312	7.57813	0.00590807	0.378418
ENSG00000104979	C19orf53	1829.74	-0.0151798	7.57742	0.00591041	0.378418
ENSG00000125656	CLPP	1693.69	-0.0130712	7.56873	0.00593895	0.378418
ENSG00000135441	BLOC1S1	657.166	-0.0143008	7.56865	0.00593923	0.378418
ENSG00000134339	SAA2	17.3905	0.0644602	7.56293	0.00595811	0.378418
ENSG00000196715	VKORC1L1	1333.73	0.0107257	7.556	0.00598107	0.378418
ENSG00000135437	RDH5	20.8728	0.0340195	7.5495	0.00600268	0.378418
ENSG00000157227	MMP14	53969.7	0.0177598	7.54764	0.00600888	0.378418
ENSG00000168824	NSG1	83.498	0.0589081	7.54051	0.00603269	0.378418
ENSG00000179262	RAD23A	2821.84	-0.0155199	7.5403	0.0060334	0.378418
ENSG00000165501	LRR1	142.383	-0.0139336	7.5371	0.00604413	0.378418
ENSG00000226950	DANCR	464.916	-0.0149998	7.53344	0.00605641	0.378418
ENSG00000100330	MTMR3	1284.56	0.0113116	7.53263	0.00605915	0.378418
ENSG00000168490	PHYHIP	46.9873	-0.0212636	7.53098	0.0060647	0.378418
ENSG00000198959	TGM2	31346.6	0.0326989	7.52464	0.00608607	0.378418
ENSG00000172757	CFL1	30936.8	-0.0130687	7.51818	0.00610794	0.378418
ENSG00000100591	AHSA1	2472.59	-0.00962124	7.5143	0.0061211	0.378418
ENSG00000168653	NDUFS5	3171.64	-0.0160116	7.50439	0.00615488	0.378418
ENSG00000133794	ARNTL	223.013	0.0136028	7.50264	0.00616087	0.378418
ENSG00000214194	SMIM30	490.638	-0.0125209	7.50086	0.00616694	0.378418
ENSG00000204967	PCDHA4	17.9811	0.0372634	7.48253	0.00623004	0.378418
ENSG00000089639	GMIP	534.36	0.0111333	7.48242	0.00623042	0.378418
ENSG00000104218	CSPP1	240.595	0.00994134	7.48121	0.00623462	0.378418
ENSG00000116704	SLC35D1	607.048	0.0188017	7.47918	0.00624165	0.378418
ENSG00000158402	CDC25C	30.4778	-0.0454441	7.47583	0.00625326	0.378418
ENSG00000217929	SEPTIN14P6	261.596	0.0255542	7.47471	0.00625717	0.378418
ENSG00000119640	ACYP1	56.0854	-0.0184996	7.46075	0.00630587	0.378418
ENSG00000263345	SGSM2-AS1	20.6621	0.0270118	7.45414	0.00632907	0.378418
ENSG00000236255		27.7796	0.0268624	7.42243	0.00644157	0.378418
ENSG00000233862		15.1091	0.026669	7.4202	0.00644957	0.378418
ENSG00000174106	LEMD3	486.33	0.0198537	7.41442	0.0064703	0.378418
ENSG00000077235	GTF3C1	3500.06	0.00898029	7.40618	0.0065	0.378418
ENSG00000260032	NORAD	6134.23	0.017265	7.39929	0.00652495	0.378418
ENSG00000032389	EIPR1	483.146	-0.00998369	7.39918	0.00652536	0.378418
ENSG00000106153	CHCHD2	4756.21	-0.0137742	7.36994	0.00663233	0.378418
ENSG00000108298	RPL19	20832.2	-0.0133682	7.36693	0.00664342	0.378418
ENSG00000169371	SNUPN	474.547	-0.00985049	7.33821	0.00675041	0.378418
ENSG00000167863	ATP5PD	1915.08	-0.0127646	7.33691	0.00675529	0.378418
ENSG00000100575	TIMM9	355.117	-0.0136477	7.32576	0.00679731	0.378418
ENSG00000119714	GPR68	252.431	0.0434996	7.32162	0.00681299	0.378418
ENSG00000173473	SMARCC1	2659.89	0.0103571	7.31815	0.00682616	0.378418
ENSG00000107862	GBF1	4342.19	0.00933945	7.31531	0.00683697	0.378418
ENSG00000262879		114.852	0.0146833	7.31057	0.00685502	0.378418
ENSG00000180139	ACTA2-AS1	52.5465	-0.0346734	7.30551	0.00687435	0.378418
ENSG00000115009	CCL20	32.535	-0.0677594	7.29924	0.00689836	0.378418
ENSG00000143727	ACP1	1433.32	-0.00735271	7.28952	0.0069358	0.378418
ENSG00000234616	JRK	491.781	0.010595	7.28833	0.0069404	0.378418
ENSG00000100985	MMP9	4.62838	0.0968535	7.28789	0.0069421	0.378418
ENSG00000139343	SNRPF	683.376	-0.0173177	7.28664	0.00694694	0.378418
ENSG00000197136	PCNX3	3147.47	0.00854338	7.28595	0.00694958	0.378418
ENSG00000096080	MRPS18A	642.984	-0.0102966	7.28355	0.00695889	0.378418
ENSG00000138326	RPS24	13846.9	-0.0130236	7.28345	0.00695928	0.378418
ENSG00000149273	RPS3	19400.2	-0.0152001	7.27543	0.00699042	0.378418
ENSG00000108344	PSMD3	4635.71	-0.00712697	7.2747	0.00699325	0.378418
ENSG00000198728	LDB1	2236.91	0.0103151	7.2548	0.00707118	0.378418
ENSG00000177600	RPLP2	10968	-0.015182	7.24058	0.00712741	0.378418
ENSG00000171858	RPS21	3356.76	-0.0160999	7.23983	0.00713036	0.378418
ENSG00000115760	BIRC6	1941.72	0.0176538	7.224	0.00719352	0.378418
ENSG00000184162	NR2C2AP	100.356	-0.0212812	7.22073	0.00720664	0.378418
ENSG00000173436	MICOS10	735.038	-0.0140235	7.21629	0.0072245	0.378418
ENSG00000196683	TOMM7	1943.78	-0.010809	7.21311	0.00723728	0.378418
ENSG00000005889	ZFX	620.821	0.0135565	7.20269	0.00727943	0.378418
ENSG00000124172	ATP5F1E	3120.99	-0.0121655	7.19099	0.00732705	0.378418
ENSG00000280184		19.4234	0.0227789	7.19058	0.00732871	0.378418
ENSG00000066739	ATG2B	822.299	0.0127122	7.19036	0.00732964	0.378418
ENSG00000131100	ATP6V1E1	3707.68	-0.00809648	7.17665	0.00738585	0.378418
ENSG00000172292	CERS6	686.719	0.0168421	7.16158	0.00744816	0.378418
ENSG00000126267	COX6B1	2490.02	-0.0139677	7.15983	0.00745541	0.378418
ENSG00000070061	ELP1	873.923	0.0096818	7.15936	0.00745738	0.378418
ENSG00000117691	NENF	683.197	-0.0140436	7.15767	0.0074644	0.378418
ENSG00000196628	TCF4	1054.33	0.0231102	7.1478	0.00750559	0.378418
ENSG00000107371	EXOSC3	335.654	-0.011102	7.14106	0.00753384	0.378418
ENSG00000139131	YARS2	485.861	-0.0102316	7.13621	0.00755428	0.378418
ENSG00000187605	TET3	500.569	0.015864	7.13429	0.00756236	0.378418
ENSG00000140307	GTF2A2	821.891	-0.010806	7.11846	0.00762941	0.378418
ENSG00000163328	GPR155	248.922	0.0221934	7.11761	0.00763305	0.378418
ENSG00000181991	MRPS11	670.14	-0.0101565	7.11231	0.00765563	0.378418
ENSG00000162695	SLC30A7	1224.71	0.0143973	7.10686	0.00767895	0.378418
ENSG00000065548	ZC3H15	1317.44	-0.00761579	7.09147	0.00774518	0.378418
ENSG00000140577	CRTC3	938.803	0.00803396	7.08575	0.00776991	0.378418
ENSG00000119681	LTBP2	25713	0.0299089	7.07528	0.00781547	0.378418
ENSG00000110344	UBE4A	1539.32	0.0122937	7.07093	0.00783445	0.378418
ENSG00000178057	NDUFAF3	1383.09	-0.0146547	7.07042	0.0078367	0.378418
ENSG00000150459	SAP18	2269.06	-0.00882527	7.06951	0.00784065	0.378418
ENSG00000134644	PUM1	2126.85	0.0130973	7.05519	0.00790361	0.378418
ENSG00000130748	TMEM160	268.654	-0.016745	7.0345	0.00799544	0.378418
ENSG00000166595	CIAO2B	1024.24	-0.0137137	7.02941	0.00801817	0.378418
ENSG00000141552	ANAPC11	847.125	-0.0136384	7.01511	0.00808248	0.378418
ENSG00000126698	DNAJC8	2500.26	-0.00996238	7.01369	0.00808887	0.378418
ENSG00000228474	OST4	4687.46	-0.0117329	7.00397	0.00813292	0.378418
ENSG00000204272	NBDY	713.712	-0.0113393	6.9981	0.00815963	0.378418
ENSG00000198824	CHAMP1	708.245	0.0096073	6.99576	0.00817032	0.378418
ENSG00000173660	UQCRH	1848.73	-0.0126732	6.99509	0.00817337	0.378418
ENSG00000142168	SOD1	2958.68	-0.0108776	6.99273	0.00818417	0.378418
ENSG00000173207	CKS1B	303.243	-0.0217395	6.98083	0.00823873	0.378418
ENSG00000139174	PRICKLE1	558.86	0.0215501	6.97901	0.00824712	0.378418
ENSG00000082805	ERC1	1929.07	0.0103468	6.96905	0.00829313	0.378418
ENSG00000130770	ATP5IF1	1917.14	-0.0115254	6.95538	0.00835678	0.378418
ENSG00000270344	POC1B-AS1	19.2265	0.0230214	6.95362	0.00836498	0.378418
ENSG00000165060	FXN	206.136	-0.011926	6.94784	0.00839204	0.378418
ENSG00000156411	ATP5MJ	1274.21	-0.0118428	6.94528	0.00840409	0.378418
ENSG00000147586	MRPS28	225.327	-0.0114533	6.94253	0.00841699	0.378418
ENSG00000075420	FNDC3B	6986.29	0.0178342	6.92509	0.00849948	0.378418
ENSG00000173113	TRMT112	2113.69	-0.0123543	6.92038	0.00852191	0.378418
ENSG00000178449	COX14	363.515	-0.0108276	6.91496	0.00854776	0.378418
ENSG00000169641	LUZP1	2407.05	0.0138463	6.90843	0.00857902	0.378418
ENSG00000151458	ANKRD50	1315.56	0.0198932	6.90577	0.00859179	0.378418
ENSG00000267673	FDX2	438.247	-0.0130636	6.90477	0.00859662	0.378418
ENSG00000260412		129.47	0.0483154	6.90344	0.00860299	0.378418
ENSG00000277791	PSMB3	1543.59	-0.0146579	6.90116	0.008614	0.378418
ENSG00000131089	ARHGEF9	306.685	0.0115794	6.88944	0.00867063	0.378418
ENSG00000137494	ANKRD42	390.366	0.0111508	6.88053	0.00871395	0.378418
ENSG00000165194	PCDH19	130.622	0.0619127	6.87792	0.0087267	0.378418
ENSG00000256043	CTSO	427.1	0.0214215	6.87693	0.00873155	0.378418
ENSG00000182168	UNC5C	9.20991	0.0862076	6.87652	0.00873353	0.378418
ENSG00000135521	LTV1	659.969	-0.00843339	6.87456	0.00874312	0.378418
ENSG00000249210	GAPDHP38	20.0284	-0.0232553	6.87237	0.00875384	0.378418
ENSG00000065427	KARS1	3309.33	-0.00992788	6.86784	0.00877604	0.378418
ENSG00000164953	TMEM67	137.713	0.0153956	6.86406	0.00879467	0.378418
ENSG00000115364	MRPL19	518.726	-0.0111956	6.86063	0.00881154	0.378418
ENSG00000125945	ZNF436	280.728	0.0112502	6.8568	0.00883046	0.378418
ENSG00000230021		10.0592	-0.0386931	6.85382	0.00884521	0.378418
ENSG00000142583	SLC2A5	74.2946	0.0488335	6.8472	0.00887802	0.378418
ENSG00000076650	GPATCH1	197.066	-0.00871255	6.84319	0.00889799	0.378418
ENSG00000164885	CDK5	636.832	-0.00948836	6.83293	0.00894924	0.378418
ENSG00000198918	RPL39	4261.88	-0.0138056	6.82519	0.00898808	0.378418
ENSG00000153246	PLA2R1	445.541	0.0281815	6.82402	0.00899399	0.378418
ENSG00000167291	TBC1D16	2725.23	0.00867752	6.80628	0.00908376	0.378418
ENSG00000168958	MFF	1290.97	-0.00809276	6.793	0.0091516	0.378418
ENSG00000115233	PSMD14	1616.55	-0.00867964	6.79196	0.00915691	0.378418
ENSG00000021776	AQR	1012.07	0.00602971	6.79113	0.0091612	0.378418
ENSG00000198689	SLC9A6	476.77	0.0126805	6.78713	0.00918175	0.378418
ENSG00000174306	ZHX3	1795.12	0.0103876	6.78705	0.00918213	0.378418
ENSG00000109390	NDUFC1	777.103	-0.0125737	6.78147	0.00921091	0.378418
ENSG00000100319	ZMAT5	304.713	-0.0133661	6.77201	0.00925987	0.378418
ENSG00000144357	UBR3	753.689	0.0185326	6.76598	0.00929116	0.378418
ENSG00000075539	FRYL	727.067	0.0158387	6.76587	0.00929178	0.378418
ENSG00000189043	NDUFA4	2510.8	-0.0122291	6.76454	0.00929867	0.378418
ENSG00000127125	PPCS	601.712	-0.00933623	6.76102	0.00931707	0.378418
ENSG00000221983	UBA52	8674.85	-0.0120515	6.75986	0.00932309	0.378418
ENSG00000110713	NUP98	2234.03	0.00714275	6.752	0.00936429	0.378418
ENSG00000205323	SARNP	975.733	-0.0120914	6.74913	0.00937932	0.378418
ENSG00000172062	SMN1	770.146	-0.012273	6.74229	0.00941539	0.378418
ENSG00000188846	RPL14	10842.2	-0.0139822	6.73901	0.00943268	0.378418
ENSG00000125691	RPL23	11858.2	-0.0123941	6.73751	0.00944063	0.378418
ENSG00000133985	TTC9	13.3214	0.0635321	6.72775	0.00949242	0.378418
ENSG00000170043	TRAPPC1	2995.21	-0.0138907	6.72433	0.00951062	0.378418
ENSG00000100028	SNRPD3	1475.94	-0.00982748	6.72102	0.00952833	0.378418
ENSG00000080603	SRCAP	2851.12	0.0153038	6.72076	0.0095297	0.378418
ENSG00000037241	RPL26L1	605.255	-0.0138308	6.7188	0.00954017	0.378418
ENSG00000178397	FAM220A	401.606	-0.0082333	6.71168	0.00957836	0.378418
ENSG00000196367	TRRAP	2283.72	0.00908801	6.70051	0.00963855	0.378418
ENSG00000123384	LRP1	57949.5	0.0169757	6.69935	0.00964478	0.378418
ENSG00000215912	TTC34	12.7234	0.0336491	6.69807	0.00965172	0.378418
ENSG00000164172	MOCS2	851.124	-0.0118353	6.69427	0.00967233	0.378418
ENSG00000159917	ZNF235	49.3306	0.0157673	6.69411	0.00967319	0.378418
ENSG00000012174	MBTPS2	616.68	0.0160967	6.68718	0.00971087	0.378418
ENSG00000254535	PABPC4L	222.35	0.0398537	6.68307	0.00973327	0.378418
ENSG00000125430	HS3ST3B1	379.663	0.0379822	6.67499	0.00977751	0.378418
ENSG00000168056	LTBP3	10031.9	0.0137636	6.67453	0.00978001	0.378418
ENSG00000203778	FAM229B	212.231	-0.0123924	6.67266	0.00979027	0.378418
ENSG00000157570	TSPAN18	177.29	0.0691578	6.67112	0.00979876	0.378418
ENSG00000198162	MAN1A2	1359.83	0.0151662	6.67045	0.00980246	0.378418
ENSG00000145041	DCAF1	653.628	0.00731062	6.66705	0.00982114	0.378418
ENSG00000139508	SLC46A3	592.322	0.0294264	6.66677	0.00982272	0.378418
ENSG00000147677	EIF3H	4462.92	-0.00862794	6.66518	0.00983149	0.378418
ENSG00000196262	PPIA	23672.8	-0.0126743	6.66101	0.00985452	0.378418
ENSG00000148358	GPR107	3377.39	0.00966762	6.65685	0.00987755	0.378418
ENSG00000143774	GUK1	4142.62	-0.0124316	6.64819	0.00992565	0.378418
ENSG00000215158	GUSBP18	41.9315	0.0168487	6.6474	0.00993009	0.378418
ENSG00000255182		55.2779	0.0186249	6.64599	0.0099379	0.378418
ENSG00000262664	OVCA2	612.063	-0.0132634	6.6392	0.00997586	0.378418
ENSG00000241990	PRR34-AS1	54.3848	-0.0203454	6.63793	0.00998296	0.378418
ENSG00000170142	UBE2E1	1132.98	-0.00828094	6.63697	0.00998838	0.378418
ENSG00000129932	DOHH	556.458	-0.0119905	6.63402	0.0100049	0.378418
ENSG00000187068	C3orf70	144.076	0.0299029	6.62797	0.010039	0.378418
ENSG00000160294	MCM3AP	2573.54	0.00519145	6.62438	0.0100592	0.378418
ENSG00000161970	RPL26	11696	-0.0115641	6.62006	0.0100836	0.378418
ENSG00000144635	DYNC1LI1	937.044	-0.00979629	6.61099	0.0101351	0.378418
ENSG00000176261	ZBTB8OS	418.643	-0.00994076	6.60658	0.0101603	0.378418
ENSG00000123243	ITIH5	18.7338	0.049014	6.60273	0.0101823	0.378418
ENSG00000230409	TCEA1P2	18.1793	-0.0505946	6.5824	0.0102992	0.378418
ENSG00000197756	RPL37A	12541.1	-0.0120491	6.57921	0.0103177	0.378418
ENSG00000151632	AKR1C2	37.6763	-0.0555132	6.55912	0.0104348	0.378418
ENSG00000278903		14.6826	-0.0443044	6.55907	0.0104351	0.378418
ENSG00000114125	RNF7	1507.75	-0.00895797	6.54607	0.0105116	0.378418
ENSG00000101413	RPRD1B	648.357	0.015906	6.54442	0.0105213	0.378418
ENSG00000130818	ZNF426	430.426	0.00775239	6.54324	0.0105284	0.378418
ENSG00000144848	ATG3	1176.07	-0.00695051	6.54209	0.0105351	0.378418
ENSG00000126261	UBA2	1634.74	-0.00697313	6.54056	0.0105442	0.378418
ENSG00000113312	TTC1	1360.8	-0.00788102	6.53387	0.010584	0.378418
ENSG00000103657	HERC1	1391.42	0.0141026	6.53282	0.0105902	0.378418
ENSG00000134248	LAMTOR5	1050.03	-0.0106061	6.52376	0.0106443	0.378418
ENSG00000048707	VPS13D	1366.6	0.0128687	6.52239	0.0106525	0.378418
ENSG00000120519	SLC10A7	183.658	0.0142816	6.51839	0.0106765	0.378418
ENSG00000070770	CSNK2A2	1883.42	-0.00588091	6.51779	0.01068	0.378418
ENSG00000218336	TENM3	2744.81	0.0196254	6.50753	0.0107419	0.378418
ENSG00000152082	MZT2B	2581.8	-0.0170557	6.50536	0.010755	0.378418
ENSG00000099953	MMP11	383.414	0.0193314	6.49913	0.0107927	0.378418
ENSG00000111817	DSE	4213.8	0.0155469	6.49882	0.0107946	0.378418
ENSG00000185608	MRPL40	577.016	-0.0143006	6.49795	0.0107999	0.378418
ENSG00000106080	FKBP14	2563.04	0.0122988	6.48566	0.0108748	0.378418
ENSG00000149131	SERPING1	458.252	0.0672504	6.47451	0.0109433	0.378418
ENSG00000120509	PDZD11	892.517	-0.0114299	6.47075	0.0109664	0.378418
ENSG00000116251	RPL22	5982.99	-0.0106604	6.46891	0.0109778	0.378418
ENSG00000119699	TGFB3	163.042	0.0265257	6.46211	0.0110198	0.378418
ENSG00000116161	CACYBP	958.082	-0.0131857	6.45675	0.0110532	0.378418
ENSG00000138279	ANXA7	2185.53	-0.00879531	6.45137	0.0110867	0.378418
ENSG00000114391	RPL24	9943	-0.0132862	6.45136	0.0110867	0.378418
ENSG00000145730	PAM	5689.79	0.0135542	6.44784	0.0111087	0.378418
ENSG00000196531	NACA	8831.4	-0.011265	6.44286	0.0111399	0.378418
ENSG00000152443	ZNF776	225.654	0.0130418	6.44257	0.0111418	0.378418
ENSG00000155368	DBI	3150.84	-0.0132821	6.43796	0.0111707	0.378418
ENSG00000171204	TMEM126B	519.958	-0.012394	6.43302	0.0112018	0.378418
ENSG00000204406	MBD5	424.817	0.0147937	6.4308	0.0112158	0.378418
ENSG00000067334	DNTTIP2	1188.03	-0.00728846	6.43008	0.0112204	0.378418
ENSG00000125534	PPDPF	7828.55	-0.0189147	6.42979	0.0112222	0.378418
ENSG00000146197	SCUBE3	766.455	0.0668481	6.42936	0.0112249	0.378418
ENSG00000267632		11.0386	0.0379152	6.42538	0.0112501	0.378418
ENSG00000116670	MAD2L2	486.38	-0.0157393	6.42357	0.0112616	0.378418
ENSG00000146112	PPP1R18	6583.66	-0.0127461	6.4208	0.0112791	0.378418
ENSG00000150779	TIMM8B	568.221	-0.0139156	6.41798	0.0112971	0.378418
ENSG00000181722	ZBTB20	50.9602	0.0324281	6.41301	0.0113287	0.378418
ENSG00000105426	PTPRS	4823.35	0.0124872	6.41132	0.0113395	0.378418
ENSG00000128654	MTX2	551.79	-0.00729758	6.41018	0.0113468	0.378418
ENSG00000165895	ARHGAP42	153.848	0.0214923	6.40059	0.0114082	0.378418
ENSG00000126432	PRDX5	6538.11	-0.0115437	6.39347	0.0114541	0.378418
ENSG00000204623	ZNRD1ASP	67.6834	0.0194431	6.38731	0.0114939	0.378418
ENSG00000132485	ZRANB2	1212.04	0.0118961	6.3795	0.0115446	0.378418
ENSG00000101444	AHCY	4200.42	-0.00772391	6.37807	0.0115539	0.378418
ENSG00000130255	RPL36	9205.24	-0.0146786	6.37019	0.0116053	0.378418
ENSG00000095059	DHPS	761.001	-0.0103125	6.36865	0.0116154	0.378418
ENSG00000116539	ASH1L	1373.59	0.0149463	6.36789	0.0116203	0.378418
ENSG00000138316	ADAMTS14	162.506	0.0396848	6.36393	0.0116463	0.378418
ENSG00000259774		10.428	0.0338362	6.36279	0.0116538	0.378418
ENSG00000156510	HKDC1	70.3256	-0.0499409	6.35583	0.0116996	0.378418
ENSG00000139263	LRIG3	318.472	0.0252335	6.35254	0.0117213	0.378418
ENSG00000166147	FBN1	37861.8	0.0207812	6.34924	0.0117431	0.378418
ENSG00000124224	PPP4R1L	148.819	0.0143993	6.34758	0.0117542	0.378418
ENSG00000144339	TMEFF2	135.75	-0.0497798	6.34718	0.0117568	0.378418
ENSG00000152683	SLC30A6	720.737	0.0122343	6.34047	0.0118014	0.378418
ENSG00000151240	DIP2C	1380.44	0.0124887	6.33982	0.0118057	0.378418
ENSG00000132821	VSTM2L	52.678	0.0333715	6.33908	0.0118106	0.378418
ENSG00000149311	ATM	1317.15	0.0159628	6.33879	0.0118126	0.378418
ENSG00000168036	CTNNB1	6486.23	0.00820561	6.33613	0.0118303	0.378418
ENSG00000130723		6501.61	0.00888223	6.33033	0.011869	0.378418
ENSG00000174437	ATP2A2	11213.2	0.0114531	6.32921	0.0118765	0.378418
ENSG00000143256	PFDN2	1186.39	-0.0130828	6.32784	0.0118857	0.378418
ENSG00000163170	BOLA3	380.748	-0.0128594	6.32599	0.0118981	0.378418
ENSG00000188153	COL4A5	1124.38	0.0174899	6.32452	0.011908	0.378418
ENSG00000143436	MRPL9	934.342	-0.0105083	6.31529	0.0119701	0.378418
ENSG00000275066	SYNRG	1037.15	0.0107153	6.31149	0.0119958	0.378418
ENSG00000136159	NUDT15	318.946	-0.0103368	6.30478	0.0120413	0.378418
ENSG00000196950	SLC39A10	584.255	0.021978	6.30276	0.012055	0.378418
ENSG00000256053	COA8	517.482	-0.0143417	6.29953	0.012077	0.378418
ENSG00000281183	NPTN-IT1	36.1344	0.0369643	6.29372	0.0121166	0.378418
ENSG00000106829	TLE4	1291.19	0.0179064	6.28543	0.0121735	0.378418
ENSG00000176393	RNPEP	2322.06	-0.0104662	6.28441	0.0121805	0.378418
ENSG00000180098	TRNAU1AP	308.14	-0.00983386	6.27966	0.0122131	0.378418
ENSG00000100526	CDKN3	70.1236	-0.0351144	6.2789	0.0122184	0.378418
ENSG00000185900	POMK	65.1838	0.0274118	6.27502	0.0122452	0.378418
ENSG00000115289	PCGF1	229.38	-0.00972217	6.27365	0.0122546	0.378418
ENSG00000260966		35.2481	0.0217041	6.26966	0.0122823	0.378418
ENSG00000110025	SNX15	441.015	-0.0121377	6.26937	0.0122843	0.378418
ENSG00000111229	ARPC3	4976.22	-0.00995692	6.26732	0.0122985	0.378418
ENSG00000112242	E2F3	776.527	0.0068351	6.2653	0.0123125	0.378418
ENSG00000132823	OSER1	639.112	-0.0110699	6.25562	0.01238	0.378418
ENSG00000237973	MTCO1P12	6419.38	-0.0386329	6.25522	0.0123828	0.378418
ENSG00000116288	PARK7	3070.69	-0.0117337	6.25328	0.0123963	0.378418
ENSG00000183648	NDUFB1	536.196	-0.0112588	6.24935	0.0124239	0.378418
ENSG00000136942	RPL35	8191.86	-0.0158125	6.24862	0.012429	0.378418
ENSG00000111726	CMAS	640.905	-0.00799161	6.24764	0.0124359	0.378418
ENSG00000185651	UBE2L3	3413.79	-0.00902091	6.24607	0.0124469	0.378418
ENSG00000161681	SHANK1	221.991	0.0184131	6.24579	0.0124489	0.378418
ENSG00000130429	ARPC1B	8705.44	-0.00943887	6.24522	0.0124529	0.378418
ENSG00000151500	THYN1	449.493	-0.011611	6.2421	0.0124749	0.378418
ENSG00000100647	SUSD6	861.475	0.0142623	6.23986	0.0124907	0.378418
ENSG00000243147	MRPL33	703.686	-0.00909154	6.23618	0.0125166	0.378418
ENSG00000131469	RPL27	11742.1	-0.0129822	6.23331	0.0125369	0.378418
ENSG00000279442		11.2643	0.0330061	6.22907	0.0125669	0.378418
ENSG00000051620	HEBP2	1202.37	-0.0170965	6.22846	0.0125713	0.378418
ENSG00000100632	ERH	1417.46	-0.0130292	6.21933	0.0126363	0.378418
ENSG00000123975	CKS2	485.078	-0.0162561	6.2119	0.0126894	0.378418
ENSG00000111843	TMEM14C	1961.86	-0.0102136	6.20832	0.0127151	0.378418
ENSG00000173120	KDM2A	2502.89	0.00696097	6.20404	0.0127459	0.378418
ENSG00000171159	BBLN	1126.09	-0.0151295	6.19918	0.012781	0.378418
ENSG00000102452	NALCN	648.313	0.0307464	6.19643	0.0128009	0.378418
ENSG00000245937	SLC12A2-DT	331.089	-0.0111124	6.19633	0.0128015	0.378418
ENSG00000122862	SRGN	378.039	-0.0617836	6.19475	0.012813	0.378418
ENSG00000267855	NDUFA7	756.415	-0.0124197	6.19289	0.0128264	0.378418
ENSG00000167920	KRT10-AS1	138.179	-0.0139559	6.19167	0.0128353	0.378418
ENSG00000103175	WFDC1	53.3724	0.0724476	6.1878	0.0128634	0.378418
ENSG00000241468	ATP5MF	2281.18	-0.0110751	6.18513	0.0128828	0.378418
ENSG00000122033	MTIF3	566.979	-0.00886622	6.17987	0.0129211	0.378418
ENSG00000188167	TMPPE	32.2226	0.0239364	6.17846	0.0129315	0.378418
ENSG00000100804	PSMB5	3123.22	-0.0089994	6.17715	0.0129411	0.378418
ENSG00000170965	PLAC1	15.7367	-0.0483974	6.16779	0.0130097	0.378418
ENSG00000171798	KNDC1	57.2771	0.0455376	6.16003	0.0130669	0.378418
ENSG00000138592	USP8	1239.32	0.009511	6.15983	0.0130684	0.378418
ENSG00000170310	STX8	435.415	-0.0116506	6.1596	0.0130701	0.378418
ENSG00000198815	FOXJ3	1093.24	0.0073096	6.15915	0.0130734	0.378418
ENSG00000109475	RPL34	4196.89	-0.0132675	6.15913	0.0130735	0.378418
ENSG00000204977	TRIM13	494.509	0.00919248	6.15843	0.0130787	0.378418
ENSG00000163001	CFAP36	670.189	-0.0114593	6.15669	0.0130916	0.378418
ENSG00000176340	COX8A	1900.34	-0.0140543	6.15571	0.0130989	0.378418
ENSG00000165637	VDAC2	3752.1	-0.00810836	6.15389	0.0131123	0.378418
ENSG00000105643	ARRDC2	174.002	-0.0148226	6.15128	0.0131317	0.378418
ENSG00000102898	NUTF2	3708.94	-0.0115482	6.14778	0.0131577	0.378418
ENSG00000233461		58.7306	-0.0187358	6.14761	0.0131589	0.378418
ENSG00000022277	RTF2	1967.06	-0.00712092	6.14703	0.0131633	0.378418
ENSG00000260456	C16orf95	45.2655	-0.017024	6.14604	0.0131707	0.378418
ENSG00000137154	RPS6	22790.8	-0.0125659	6.13465	0.0132558	0.378418
ENSG00000128567	PODXL	456.04	0.0401384	6.13362	0.0132635	0.378418
ENSG00000213888	LINC01521	77.8647	0.0143098	6.12975	0.0132926	0.378418
ENSG00000100731	PCNX1	2067.23	0.0177772	6.12072	0.0133606	0.378418
ENSG00000122557	HERPUD2	699.227	0.00930007	6.1177	0.0133835	0.378418
ENSG00000049618	ARID1B	1777.68	0.0111158	6.11628	0.0133942	0.378418
ENSG00000188033	ZNF490	68.0724	0.0201237	6.11115	0.0134332	0.378418
ENSG00000047578	KATNIP	796.41	0.0070715	6.10763	0.01346	0.378418
ENSG00000117419	ERI3	1058.52	-0.00897268	6.10294	0.0134957	0.378418
ENSG00000175756	AURKAIP1	1805.61	-0.0128646	6.10236	0.0135001	0.378418
ENSG00000178741	COX5A	1889.28	-0.0109081	6.102	0.0135029	0.378418
ENSG00000133112	TPT1	42221.3	-0.0103314	6.09652	0.0135449	0.378418
ENSG00000008869	HEATR5B	535.648	0.0100234	6.09358	0.0135674	0.378418
ENSG00000107651	SEC23IP	1498.98	0.0106262	6.09088	0.0135881	0.378418
ENSG00000217930	PAM16	359.131	-0.0136105	6.09079	0.0135888	0.378418
ENSG00000049239	H6PD	4201.17	0.0129627	6.0863	0.0136234	0.378418
ENSG00000005075	POLR2J	971.898	-0.0122085	6.08578	0.0136274	0.378418
ENSG00000145425	RPS3A	12207.9	-0.0125054	6.08333	0.0136463	0.378418
ENSG00000125686	MED1	1155.08	0.008381	6.07999	0.0136722	0.378418
ENSG00000107164	FUBP3	1702.63	0.00882039	6.07984	0.0136733	0.378418
ENSG00000129315	CCNT1	574.473	0.0135387	6.07928	0.0136776	0.378418
ENSG00000089220	PEBP1	4840.59	-0.00853394	6.07752	0.0136913	0.378418
ENSG00000111775	COX6A1	3393.89	-0.0114554	6.07387	0.0137196	0.378418
ENSG00000132313	MRPL35	471.835	-0.0073278	6.07202	0.013734	0.378418
ENSG00000145592	RPL37	11584.6	-0.011608	6.07165	0.0137368	0.378418
ENSG00000139436	GIT2	1431.27	0.00666722	6.06868	0.01376	0.378418
ENSG00000172590	MRPL52	1131.73	-0.0124445	6.06731	0.0137706	0.378418
ENSG00000204217	BMPR2	1810.43	0.0152141	6.05638	0.0138561	0.378418
ENSG00000100075	SLC25A1	3135.36	-0.01128	6.05506	0.0138665	0.378418
ENSG00000125995	ROMO1	1005.49	-0.0147992	6.05395	0.0138752	0.378418
ENSG00000250959	GLUD1P3	20.4861	0.0207547	6.05245	0.013887	0.378418
ENSG00000137573	SULF1	42212.1	0.0241058	6.05057	0.0139018	0.378418
ENSG00000156030	MIDEAS	1113.29	0.011506	6.04944	0.0139107	0.378418
ENSG00000239200	RPL22P20	26.6595	-0.019886	6.04717	0.0139286	0.378418
ENSG00000187189	TSPYL4	708.214	0.0170014	6.04441	0.0139504	0.378418
ENSG00000144426	NBEAL1	254.928	0.0136626	6.04111	0.0139765	0.378418
ENSG00000251322	SHANK3	293.562	0.0152681	6.03952	0.0139891	0.378418
ENSG00000119986	AVPI1	614.177	-0.0204703	6.03363	0.0140359	0.378418
ENSG00000170860	LSM3	561.762	-0.0121007	6.02739	0.0140856	0.378418
ENSG00000144713	RPL32	11253.6	-0.0130339	6.02475	0.0141067	0.378418
ENSG00000260804	LINC01963	295.902	0.0154409	6.01111	0.0142161	0.378418
ENSG00000163359	COL6A3	40671.9	0.0259502	6.01025	0.014223	0.378418
ENSG00000168939	SPRY3	70.8946	0.0196786	6.01014	0.0142239	0.378418
ENSG00000134056	MRPS36	296.466	-0.0126612	6.0082	0.0142395	0.378418
ENSG00000120860	WASHC3	568.192	-0.010734	6.00561	0.0142604	0.378418
ENSG00000109756	RAPGEF2	1250.32	0.0141699	6.00512	0.0142645	0.378418
ENSG00000091536	MYO15A	19.4651	-0.0243771	6.00237	0.0142867	0.378418
ENSG00000157653	C9orf43	16.5336	-0.0268395	6.00186	0.0142908	0.378418
ENSG00000134250	NOTCH2	11845.6	0.019043	5.99996	0.0143062	0.378418
ENSG00000170469	SPATA24	41.7985	-0.0190849	5.99788	0.0143231	0.378418
ENSG00000154845	PPP4R1	1505.34	0.007023	5.99056	0.0143826	0.378418
ENSG00000099331	MYO9B	6377.96	0.00691407	5.98849	0.0143995	0.378418
ENSG00000101452	DHX35	234.476	0.00784072	5.9884	0.0144002	0.378418
ENSG00000125971	DYNLRB1	2868.95	-0.0121514	5.98321	0.0144427	0.378418
ENSG00000086065	CHMP5	1209.2	-0.00631034	5.98071	0.0144632	0.378418
ENSG00000112902	SEMA5A	1729.56	0.0253339	5.97971	0.0144714	0.378418
ENSG00000024862	CCDC28A	164.12	-0.0095757	5.9784	0.0144821	0.378418
ENSG00000133739	LRRCC1	76.1461	-0.0209962	5.97769	0.014488	0.378418
ENSG00000117305	HMGCL	559.385	-0.0085266	5.97708	0.014493	0.378418
ENSG00000171863	RPS7	11041.2	-0.0134564	5.97626	0.0144997	0.378418
ENSG00000165185	KIAA1958	37.1066	0.0217853	5.97447	0.0145145	0.378418
ENSG00000155115	GTF3C6	797.184	-0.0114878	5.97306	0.0145261	0.378418
ENSG00000110075	PPP6R3	1438.69	0.00918169	5.97182	0.0145362	0.378418
ENSG00000172775	PSME3IP1	1202.3	-0.00701982	5.97168	0.0145374	0.378418
ENSG00000235065	RPL24P2	24.6619	-0.0246807	5.97097	0.0145433	0.378418
ENSG00000013306	SLC25A39	2354.24	-0.00824342	5.96885	0.0145608	0.378418
ENSG00000141741	MIEN1	921.485	-0.0107403	5.96778	0.0145696	0.378418
ENSG00000272888	CHASERR	350.331	-0.0113305	5.96703	0.0145758	0.378418
ENSG00000160213	CSTB	4415.18	-0.0131289	5.96679	0.0145778	0.378418
ENSG00000115561	CHMP3	2223.11	-0.00576848	5.96216	0.0146161	0.378418
ENSG00000170515	PA2G4	3714.25	-0.00965745	5.95807	0.0146501	0.378418
ENSG00000165671	NSD1	1844.3	0.00725001	5.95756	0.0146543	0.378418
ENSG00000188783	PRELP	66.1012	0.0273986	5.95496	0.014676	0.378418
ENSG00000147123	NDUFB11	1195.34	-0.0125385	5.95389	0.0146849	0.378418
ENSG00000142937	RPS8	14721.6	-0.0126907	5.95376	0.0146859	0.378418
ENSG00000244270	RPL32P29	79.1638	-0.0170418	5.94976	0.0147193	0.378418
ENSG00000189129	PLAC9	77.8133	-0.0412049	5.9473	0.0147399	0.378418
ENSG00000101421	CHMP4B	3195.78	-0.00577919	5.94507	0.0147585	0.378418
ENSG00000143486	EIF2D	1133.45	-0.00841529	5.94166	0.0147871	0.378418
ENSG00000257151		111.8	0.0266554	5.93985	0.0148023	0.378418
ENSG00000119650	IFT43	422.424	-0.0105496	5.93583	0.0148361	0.378677
ENSG00000174917	MICOS13	880.936	-0.0124487	5.92812	0.0149011	0.37934
ENSG00000196440	ARMCX4	396.485	0.0142635	5.92394	0.0149366	0.37934
ENSG00000119632	IFI27L2	1120.78	-0.0139738	5.92132	0.0149588	0.37934
ENSG00000129951	PLPPR3	58.6541	0.0414813	5.91866	0.0149814	0.37934
ENSG00000168813	ZNF507	424.187	0.0113479	5.9162	0.0150023	0.37934
ENSG00000166272	WBP1L	1963.43	0.0123564	5.91593	0.0150045	0.37934
ENSG00000100031	GGT1	256.597	-0.0389574	5.90938	0.0150604	0.380151
ENSG00000114942	EEF1B2	7797.35	-0.00965819	5.90447	0.0151025	0.380398
ENSG00000090905	TNRC6A	1920.89	0.00808197	5.90146	0.0151284	0.380398
ENSG00000005339	CREBBP	2839.42	0.00979022	5.89882	0.015151	0.380398
ENSG00000132170	PPARG	153.676	-0.0323471	5.89616	0.0151739	0.380398
ENSG00000163191	S100A11	12870.7	-0.0141696	5.89409	0.0151918	0.380398
ENSG00000166136	NDUFB8	1711.99	-0.0129266	5.88704	0.0152527	0.380398
ENSG00000101882	NKAP	418.165	-0.00647532	5.88428	0.0152766	0.380398
ENSG00000214736	TOMM6	1082.08	-0.0112801	5.88205	0.015296	0.380398
ENSG00000170909	OSCAR	36.8495	-0.0584143	5.87932	0.0153197	0.380398
ENSG00000188372	ZP3	52.0564	-0.0342106	5.87727	0.0153376	0.380398
ENSG00000097021	ACOT7	1848.23	-0.012274	5.8767	0.0153426	0.380398
ENSG00000143919	CAMKMT	142.332	-0.0135166	5.87321	0.015373	0.380398
ENSG00000170222	ADPRM	140.661	-0.0122468	5.8699	0.0154019	0.380398
ENSG00000012232	EXTL3	1818.8	0.00869532	5.86675	0.0154295	0.380398
ENSG00000203724	C1orf53	61.1714	-0.0158823	5.86312	0.0154613	0.380398
ENSG00000151468	CCDC3	11.3235	-0.0602376	5.86192	0.0154719	0.380398
ENSG00000102181	CD99L2	3860.41	0.00892578	5.86112	0.0154789	0.380398
ENSG00000174579	MSL2	344.242	0.0112647	5.85487	0.015534	0.380398
ENSG00000139182	CLSTN3	1819.98	0.0134602	5.85137	0.0155649	0.380398
ENSG00000133424	LARGE1	450.978	0.0260842	5.84905	0.0155855	0.380398
ENSG00000156831	NSMCE2	387.087	-0.00922561	5.84854	0.01559	0.380398
ENSG00000119737	GPR75	41.7239	0.0248593	5.84589	0.0156135	0.380398
ENSG00000105171	POP4	628.201	-0.00759566	5.84541	0.0156178	0.380398
ENSG00000134532	SOX5	38.7779	0.0292309	5.84252	0.0156434	0.380419
ENSG00000120963	ZNF706	758.857	-0.00813974	5.83995	0.0156663	0.380419
ENSG00000005007	UPF1	3154.72	0.00749269	5.83051	0.0157505	0.381123
ENSG00000167258	CDK12	1507.33	0.00971797	5.83041	0.0157515	0.381123
ENSG00000078668	VDAC3	1066.98	-0.00997877	5.8231	0.015817	0.381123
ENSG00000105393	BABAM1	1782.6	-0.00777806	5.82146	0.0158318	0.381123
ENSG00000204392	LSM2	348.292	-0.0146701	5.81727	0.0158696	0.381123
ENSG00000266472	MRPS21	1226.12	-0.0108738	5.81608	0.0158803	0.381123
ENSG00000205629	LCMT1	532.439	-0.00841141	5.81125	0.015924	0.381123
ENSG00000278845	MRPL45	780.471	-0.00725579	5.81093	0.0159269	0.381123
ENSG00000074356	NCBP3	1212.26	0.00573705	5.80818	0.0159518	0.381123
ENSG00000107036	RIC1	1083.21	0.0131819	5.80536	0.0159774	0.381123
ENSG00000172456	FGGY	125.501	-0.0153028	5.80429	0.0159871	0.381123
ENSG00000163629	PTPN13	1376.81	0.0128627	5.79894	0.0160359	0.381123
ENSG00000165633	VSTM4	235.56	0.0203077	5.79622	0.0160607	0.381123
ENSG00000230989	HSBP1	1970.07	-0.00809416	5.7943	0.0160782	0.381123
ENSG00000132938	MTUS2	22.5444	0.0402851	5.79259	0.0160938	0.381123
ENSG00000196922	ZNF252P	349.462	0.00926735	5.78882	0.0161285	0.381123
ENSG00000145741	BTF3	7039.4	-0.0111059	5.78329	0.0161793	0.381123
ENSG00000077238	IL4R	1469.6	0.0145157	5.78109	0.0161995	0.381123
ENSG00000166747	AP1G1	2208.73	0.0081491	5.7803	0.0162068	0.381123
ENSG00000166441	RPL27A	19593.5	-0.0129677	5.7783	0.0162253	0.381123
ENSG00000205544	TMEM256	426.96	-0.0156377	5.77487	0.016257	0.381123
ENSG00000166803	PCLAF	66.2441	-0.0418847	5.7747	0.0162585	0.381123
ENSG00000149256	TENM4	1245.03	0.0222929	5.77218	0.0162818	0.381123
ENSG00000148143	ZNF462	644.79	0.0169519	5.77203	0.0162832	0.381123
ENSG00000271430		356.284	0.0222295	5.76969	0.0163049	0.381123
ENSG00000197956	S100A6	16980.2	-0.0201671	5.76379	0.0163598	0.381123
ENSG00000234444	ZNF736	71.8628	0.0192278	5.7629	0.016368	0.381123
ENSG00000241837	ATP5PO	1669.77	-0.0123179	5.76236	0.0163731	0.381123
ENSG00000131174	COX7B	1118.88	-0.012389	5.75988	0.0163962	0.381123
ENSG00000127526	SLC35E1	2933.37	0.00892281	5.75831	0.0164109	0.381123
ENSG00000212127	TAS2R14	18.8936	0.0183149	5.75574	0.0164349	0.381127
ENSG00000110442	COMMD9	886.8	-0.00907916	5.75179	0.0164719	0.381431
ENSG00000197894	ADH5	3068.95	-0.00806329	5.7431	0.0165535	0.382768
ENSG00000124380	SNRNP27	586.787	-0.00801076	5.73812	0.0166006	0.3833
ENSG00000080493	SLC4A4	241.556	0.028496	5.72807	0.0166958	0.384109
ENSG00000267221	C17orf113	47.1663	0.0169271	5.728	0.0166965	0.384109
ENSG00000130347	RTN4IP1	84.5031	-0.0136397	5.7264	0.0167117	0.384109
ENSG00000127337	YEATS4	134.604	-0.00962481	5.72115	0.0167618	0.384109
ENSG00000116406	EDEM3	1494.39	0.0204973	5.71866	0.0167856	0.384109
ENSG00000005059	MCUB	137.469	-0.0226852	5.71748	0.0167969	0.384109
ENSG00000175061	SNHG29	8691.2	-0.0109418	5.71554	0.0168154	0.384109
ENSG00000105258	POLR2I	430.594	-0.0142517	5.71423	0.0168279	0.384109
ENSG00000166343	MSS51	35.2883	0.0182005	5.70926	0.0168756	0.384649
ENSG00000120279	MYCT1	52.8333	-0.0788885	5.70018	0.0169631	0.386093
ENSG00000142676	RPL11	14092.1	-0.0124233	5.69397	0.0170233	0.386246
ENSG00000150760	DOCK1	2483.34	0.00789804	5.69158	0.0170465	0.386246
ENSG00000117139	KDM5B	2317.85	0.00859871	5.68999	0.017062	0.386246
ENSG00000123219	CENPK	53.9783	-0.0243425	5.68713	0.0170898	0.386246
ENSG00000089916	GPATCH2L	813.874	0.0119411	5.68575	0.0171033	0.386246
ENSG00000130749	ZC3H4	1245.05	0.00861178	5.68455	0.0171149	0.386246
ENSG00000198892	SHISA4	1177.62	-0.0117647	5.67723	0.0171865	0.386587
ENSG00000226124	FTCDNL1	18.948	-0.0270712	5.67411	0.0172171	0.386587
ENSG00000242485	MRPL20	1132.83	-0.00845007	5.6683	0.0172742	0.386587
ENSG00000103363	ELOB	2216.39	-0.0134947	5.66634	0.0172935	0.386587
ENSG00000164587	RPS14	9734.89	-0.0147341	5.66567	0.0173001	0.386587
ENSG00000119682	AREL1	1374.79	0.00816307	5.6617	0.0173393	0.386587
ENSG00000119705	SLIRP	494.351	-0.0131883	5.65951	0.017361	0.386587
ENSG00000181638	ZFP41	437.973	0.00822284	5.65853	0.0173707	0.386587
ENSG00000128185	DGCR6L	931.825	-0.0140491	5.65718	0.017384	0.386587
ENSG00000136930	PSMB7	3083.7	-0.0113977	5.65233	0.0174322	0.386587
ENSG00000142669	SH3BGRL3	14068.9	-0.0192884	5.65213	0.0174342	0.386587
ENSG00000147471	PLPBP	666.909	-0.0084336	5.65155	0.0174399	0.386587
ENSG00000226210	WASH8P	419.51	0.0269301	5.64888	0.0174666	0.386587
ENSG00000139971	ARMH4	371.816	0.0198006	5.64865	0.0174688	0.386587
ENSG00000136935	GOLGA1	751.275	0.0058126	5.6424	0.0175312	0.386667
ENSG00000183718	TRIM52	218.194	0.0126436	5.63406	0.0176148	0.386667
ENSG00000122482	ZNF644	570.122	0.0147601	5.62697	0.0176862	0.386667
ENSG00000197238	H4C11	16.8436	-0.0308411	5.62568	0.0176992	0.386667
ENSG00000159377	PSMB4	4011.56	-0.0100836	5.62465	0.0177096	0.386667
ENSG00000261799		91.8624	0.0131745	5.62314	0.0177248	0.386667
ENSG00000138641	HERC3	407.065	0.021684	5.62311	0.0177252	0.386667
ENSG00000279092		11.7559	-0.0433996	5.61661	0.017791	0.386667
ENSG00000162998	FRZB	28.1154	0.0427359	5.6138	0.0178195	0.386667
ENSG00000133997	MED6	421.853	-0.00752841	5.61094	0.0178486	0.386667
ENSG00000237765	FAM200B	559.483	-0.00935286	5.60758	0.0178829	0.386667
ENSG00000123485	HJURP	231.691	-0.0286409	5.60637	0.0178953	0.386667
ENSG00000174307	PHLDA3	3409.73	-0.0104213	5.60616	0.0178975	0.386667
ENSG00000125351	UPF3B	291.435	-0.00872123	5.60597	0.0178994	0.386667
ENSG00000115758	ODC1	2614.66	-0.0154277	5.6052	0.0179073	0.386667
ENSG00000106771	TMEM245	1696.93	0.0158825	5.60223	0.0179376	0.386667
ENSG00000179271	GADD45GIP1	1542.63	-0.0145906	5.59982	0.0179624	0.386667
ENSG00000257698	GIHCG	55.5003	-0.0184186	5.59907	0.01797	0.386667
ENSG00000158042	MRPL17	1320.73	-0.00925378	5.59731	0.0179881	0.386667
ENSG00000136522	MRPL47	532.924	-0.0110788	5.59637	0.0179977	0.386667
ENSG00000031081	ARHGAP31	998.843	0.0124581	5.59633	0.0179982	0.386667
ENSG00000117036	ETV3	521.438	0.00955441	5.59346	0.0180276	0.386667
ENSG00000153391	INO80C	176.737	-0.0138769	5.59333	0.018029	0.386667
ENSG00000138629	UBL7	852.318	-0.0101176	5.58729	0.0180912	0.387041
ENSG00000088812	ATRN	2558.45	0.0132586	5.58237	0.0181422	0.387041
ENSG00000181163	NPM1	17465.4	-0.0108394	5.57995	0.0181673	0.387041
ENSG00000151612	ZNF827	868.439	0.015383	5.57677	0.0182003	0.387041
ENSG00000114405	C3orf14	106.321	-0.0148376	5.57607	0.0182075	0.387041
ENSG00000125821	DTD1	1048.49	-0.0132802	5.57593	0.018209	0.387041
ENSG00000150316	CWC15	746.979	-0.0100045	5.57526	0.018216	0.387041
ENSG00000100209	HSCB	199.281	-0.0109512	5.57161	0.018254	0.387121
ENSG00000143450	OAZ3	37.5679	-0.0164561	5.57025	0.0182682	0.387121
ENSG00000229117	RPL41	23484.5	-0.00947241	5.56773	0.0182945	0.387122
ENSG00000125356	NDUFA1	1344.87	-0.010997	5.56492	0.0183239	0.387122
ENSG00000124562	SNRPC	1777.64	-0.0119467	5.56308	0.0183431	0.387122
ENSG00000130522	JUND	4532.63	-0.0133101	5.56098	0.0183651	0.387122
ENSG00000161381	PLXDC1	43.2721	0.0479974	5.55707	0.0184062	0.387246
ENSG00000110429	FBXO3	329.333	0.0109404	5.55581	0.0184195	0.387246
ENSG00000169851	PCDH7	1258.19	0.0263334	5.55104	0.0184697	0.387416
ENSG00000172336	POP7	533.524	-0.0117144	5.54807	0.0185011	0.387416
ENSG00000165240	ATP7A	357.019	0.0211659	5.54452	0.0185387	0.387416
ENSG00000111640	GAPDH	111241	-0.0132179	5.54293	0.0185555	0.387416
ENSG00000115163	CENPA	59.9123	-0.0330391	5.54215	0.0185638	0.387416
ENSG00000131408	NR1H2	1814.92	-0.00706754	5.54127	0.0185731	0.387416
ENSG00000124733	MEA1	1409.39	-0.0117446	5.52914	0.0187023	0.3884
ENSG00000129566	TEP1	727.721	0.0117194	5.5257	0.0187391	0.3884
ENSG00000165704	HPRT1	270.472	-0.0156171	5.52385	0.0187589	0.3884
ENSG00000105640	RPL18A	16946.6	-0.0123737	5.52182	0.0187807	0.3884
ENSG00000026025	VIM	175198	-0.0130746	5.51952	0.0188054	0.3884
ENSG00000131470	PSMC3IP	98.9273	-0.0212477	5.51949	0.0188058	0.3884
ENSG00000198720	ANKRD13B	294.056	-0.0128779	5.51761	0.018826	0.3884
ENSG00000155592	ZKSCAN2	248.269	0.00780008	5.51432	0.0188614	0.3884
ENSG00000090263	MRPS33	414.557	-0.0102922	5.51367	0.0188684	0.3884
ENSG00000135677	GNS	8274.04	0.0144299	5.50849	0.0189244	0.3884
ENSG00000058673	ZC3H11A	3837.3	0.00782426	5.50649	0.018946	0.3884
ENSG00000152894	PTPRK	3039.81	0.0166242	5.5052	0.01896	0.3884
ENSG00000150961	SEC24D	5183.44	0.0104506	5.50282	0.0189859	0.3884
ENSG00000164073	MFSD8	242.603	0.00974485	5.50179	0.0189971	0.3884
ENSG00000142065	ZFP14	78.7005	0.0172278	5.50029	0.0190133	0.3884
ENSG00000198034	RPS4X	16268.9	-0.0112079	5.49825	0.0190355	0.3884
ENSG00000106399	RPA3	96.3975	-0.0153637	5.496	0.01906	0.3884
ENSG00000146066	HIGD2A	1141.08	-0.0110362	5.49481	0.019073	0.3884
ENSG00000157045	NTAN1	788.356	-0.0124163	5.49398	0.0190821	0.3884
ENSG00000171960	PPIH	311.139	-0.0138374	5.489	0.0191365	0.388636
ENSG00000013523	ANGEL1	527.707	0.00973419	5.48492	0.0191811	0.388636
ENSG00000055609	KMT2C	1237.84	0.0158142	5.48267	0.0192059	0.388636
ENSG00000198742	SMURF1	1297.27	0.00788524	5.48125	0.0192215	0.388636
ENSG00000185088	RPS27L	2736.57	-0.010927	5.48088	0.0192256	0.388636
ENSG00000197296	FITM2	376.934	0.0104789	5.4796	0.0192397	0.388636
ENSG00000133983	COX16	447.455	-0.0104175	5.47478	0.0192928	0.388732
ENSG00000138430	OLA1	1617.29	-0.0109375	5.47261	0.0193168	0.388732
ENSG00000184076	UQCR10	1237.95	-0.0100618	5.47092	0.0193354	0.388732
ENSG00000111231	GPN3	213.884	-0.0100252	5.47036	0.0193417	0.388732
ENSG00000141854	MISP3	22.4047	-0.0236659	5.46375	0.019415	0.389244
ENSG00000082515	MRPL22	403.532	-0.0114478	5.46366	0.0194159	0.389244
ENSG00000083544	TDRD3	221.161	-0.00958566	5.4589	0.0194689	0.389691
ENSG00000104093	DMXL2	548.966	0.021369	5.45728	0.019487	0.389691
ENSG00000180917	CMTR2	378.511	0.0132219	5.45099	0.0195572	0.390166
ENSG00000172809	RPL38	5256.27	-0.0115306	5.44578	0.0196157	0.390166
ENSG00000116221	MRPL37	1984.97	-0.00764974	5.44556	0.0196181	0.390166
ENSG00000185621	LMLN	315.687	0.0160806	5.4428	0.0196492	0.390166
ENSG00000189079	ARID2	463.455	0.014295	5.4409	0.0196705	0.390166
ENSG00000143344	RGL1	720.406	0.0138302	5.43483	0.019739	0.390166
ENSG00000131725	WDR44	625.023	0.0111722	5.43401	0.0197483	0.390166
ENSG00000188295	ZNF669	85.3028	0.0139473	5.43351	0.0197539	0.390166
ENSG00000143624	INTS3	2368.67	0.00687923	5.43346	0.0197545	0.390166
ENSG00000186665	C17orf58	107.522	-0.0134887	5.43342	0.0197549	0.390166
ENSG00000185043	CIB1	1597.8	-0.0102977	5.42725	0.0198249	0.39059
ENSG00000171940	ZNF217	1059.68	0.0122458	5.42518	0.0198484	0.39059
ENSG00000088325	TPX2	807.549	-0.0241728	5.42388	0.0198632	0.39059
ENSG00000037749	MFAP3	341.565	0.0191735	5.42105	0.0198954	0.39059
ENSG00000179958	DCTPP1	308.094	-0.0123474	5.42065	0.0199	0.39059
ENSG00000160124	MIX23	220.256	-0.0146189	5.41651	0.0199472	0.39059
ENSG00000262919	CCNQ	596.762	-0.0101712	5.41648	0.0199475	0.39059
ENSG00000185112	FAM43A	2338	-0.0232782	5.40626	0.0200647	0.391939
ENSG00000147316	MCPH1	319.171	0.00776934	5.40619	0.0200655	0.391939
ENSG00000105372	RPS19	13290.7	-0.0125614	5.40326	0.0200992	0.392119
ENSG00000008018	PSMB1	3090.05	-0.00983181	5.39819	0.0201576	0.392778
ENSG00000164611	PTTG1	282.278	-0.0277845	5.39247	0.0202239	0.392996
ENSG00000150991	UBC	45343.9	-0.00860843	5.38481	0.0203128	0.392996
ENSG00000101898	MCTS2	18.8211	0.0203563	5.38052	0.0203628	0.392996
ENSG00000183386	FHL3	1062.69	-0.0150245	5.37717	0.020402	0.392996
ENSG00000083642	PDS5B	534.389	0.0116008	5.37147	0.0204687	0.392996
ENSG00000171658	NMRAL2P	45.3044	-0.0433589	5.36552	0.0205386	0.392996
ENSG00000236393		41.7641	-0.0208506	5.36483	0.0205468	0.392996
ENSG00000185591	SP1	1534.79	0.0067321	5.36466	0.0205487	0.392996
ENSG00000105254	TBCB	1661.74	-0.011317	5.36377	0.0205593	0.392996
ENSG00000111639	MRPL51	1850.07	-0.0118782	5.36285	0.0205701	0.392996
ENSG00000170160	CCDC144A	33.6279	0.0421769	5.35919	0.0206133	0.392996
ENSG00000110841	PPFIBP1	1863.55	0.0109839	5.35331	0.020683	0.392996
ENSG00000164104	HMGB2	706.711	-0.0268514	5.35087	0.0207119	0.392996
ENSG00000162627	SNX7	878.232	-0.00953302	5.34791	0.0207471	0.392996
ENSG00000143947	RPS27A	8652.09	-0.0109929	5.34715	0.0207562	0.392996
ENSG00000064489	BORCS8-MEF2B	208.656	-0.0112988	5.34361	0.0207984	0.392996
ENSG00000152104	PTPN14	3517.72	0.0124252	5.34358	0.0207987	0.392996
ENSG00000189164	ZNF527	85.9502	0.00983265	5.34004	0.020841	0.392996
ENSG00000161016	RPL8	25334.3	-0.0120046	5.33954	0.0208469	0.392996
ENSG00000089006	SNX5	1477.81	-0.00972847	5.33903	0.0208531	0.392996
ENSG00000189057	FAM111B	48.5372	-0.0463998	5.33903	0.0208531	0.392996
ENSG00000128581	IFT22	393.783	-0.00894716	5.33747	0.0208718	0.392996
ENSG00000164692	COL1A2	347911	0.0187042	5.33522	0.0208987	0.392996
ENSG00000198242	RPL23A	3465.71	-0.0119754	5.33489	0.0209027	0.392996
ENSG00000134046	MBD2	1220.6	-0.00950213	5.3341	0.0209122	0.392996
ENSG00000203867	RBM20	15.814	-0.0448931	5.32937	0.020969	0.392996
ENSG00000174444	RPL4	31746.6	-0.0102747	5.32863	0.0209779	0.392996
ENSG00000260238	PMF1-BGLAP	74.1594	-0.017874	5.32721	0.020995	0.392996
ENSG00000107779	BMPR1A	852.277	0.0104928	5.32353	0.0210393	0.392996
ENSG00000240972	MIF	8662.16	-0.0134356	5.32271	0.0210493	0.392996
ENSG00000107957	SH3PXD2A	13045.8	0.0169734	5.3207	0.0210736	0.392996
ENSG00000140365	COMMD4	930.378	-0.0108271	5.3173	0.0211147	0.392996
ENSG00000158019	BABAM2	655.194	-0.00741116	5.31307	0.021166	0.392996
ENSG00000185565	LSAMP	338.052	0.034825	5.31077	0.021194	0.392996
ENSG00000130635	COL5A1	114936	0.0199723	5.31071	0.0211947	0.392996
ENSG00000156875	MFSD14A	1168.85	0.0120902	5.30861	0.0212203	0.392996
ENSG00000131389	SLC6A6	2794.37	0.0250152	5.30649	0.0212461	0.392996
ENSG00000163719	MTMR14	792.367	-0.00770207	5.30642	0.021247	0.392996
ENSG00000148303	RPL7A	24544.7	-0.0119501	5.30411	0.0212751	0.392996
ENSG00000118181	RPS25	9114.92	-0.011057	5.30293	0.0212896	0.392996
ENSG00000166025	AMOTL1	1885.16	0.0120812	5.30279	0.0212913	0.392996
ENSG00000138448	ITGAV	5204.91	0.0217924	5.29656	0.0213676	0.392996
ENSG00000162885	B3GALNT2	279.116	0.0138251	5.29508	0.0213858	0.392996
ENSG00000132294	EFR3A	1469.55	0.0157707	5.29479	0.0213893	0.392996
ENSG00000165916	PSMC3	2926.98	-0.0108026	5.29301	0.0214111	0.392996
ENSG00000176909	MAMSTR	41.6936	-0.0231207	5.28913	0.021459	0.392996
ENSG00000188820	CALHM6	10.176	-0.0282754	5.28351	0.0215283	0.392996
ENSG00000143393	PI4KB	1916.17	0.00551072	5.28315	0.0215328	0.392996
ENSG00000140525	FANCI	249.364	-0.0150833	5.2828	0.0215371	0.392996
ENSG00000106571	GLI3	909.675	0.0171681	5.27976	0.0215747	0.392996
ENSG00000182774	RPS17	14974.5	-0.0100311	5.2781	0.0215953	0.392996
ENSG00000172172	MRPL13	454.268	-0.0105411	5.27497	0.0216342	0.392996
ENSG00000115170	ACVR1	1560.47	0.00970496	5.27484	0.0216357	0.392996
ENSG00000256667	KLRA1P	24.986	0.01748	5.27346	0.0216529	0.392996
ENSG00000186184	POLR1D	1425.69	-0.00892229	5.27192	0.0216721	0.392996
ENSG00000204822	MRPL53	567.992	-0.0120714	5.26687	0.0217351	0.392996
ENSG00000071994	PDCD2	1050.51	-0.00761272	5.26649	0.0217398	0.392996
ENSG00000137809	ITGA11	22646.2	0.0278072	5.26399	0.021771	0.392996
ENSG00000213085	CFAP45	28.8843	-0.0198983	5.26024	0.021818	0.392996
ENSG00000167641	PPP1R14A	95.1832	-0.0564007	5.25716	0.0218567	0.392996
ENSG00000159140	SON	5110.71	0.0102244	5.25237	0.0219169	0.392996
ENSG00000127081	ZNF484	73.3919	0.0141973	5.25169	0.0219254	0.392996
ENSG00000126756	UXT	631.9	-0.0109929	5.2507	0.0219379	0.392996
ENSG00000143515	ATP8B2	3692.01	0.00979563	5.24911	0.021958	0.392996
ENSG00000203805	PLPP4	615.192	0.0177145	5.2481	0.0219707	0.392996
ENSG00000100764	PSMC1	2780.07	-0.00854311	5.24788	0.0219736	0.392996
ENSG00000084623	EIF3I	4358.39	-0.0109522	5.24417	0.0220205	0.392996
ENSG00000203950	RTL8A	1341.94	-0.0130154	5.24415	0.0220207	0.392996
ENSG00000074201	CLNS1A	1587.93	-0.00857597	5.2439	0.0220238	0.392996
ENSG00000148396	SEC16A	5532.05	0.0100141	5.24227	0.0220445	0.392996
ENSG00000183011	NAA38	881.199	-0.0120845	5.24089	0.0220619	0.392996
ENSG00000174353	STAG3L3	362.056	0.0156693	5.23669	0.0221154	0.392996
ENSG00000168159	RNF187	3428.99	-0.0105959	5.23369	0.0221534	0.392996
ENSG00000077152	UBE2T	128.195	-0.0162328	5.23083	0.0221899	0.392996
ENSG00000073614	KDM5A	1158.2	0.00834907	5.22589	0.022253	0.392996
ENSG00000160446	ZDHHC12	739.322	-0.0124499	5.22586	0.0222534	0.392996
ENSG00000103005	USB1	1851.08	-0.00875292	5.22429	0.0222735	0.392996
ENSG00000132341	RAN	6150.88	-0.00858076	5.22119	0.0223133	0.392996
ENSG00000090932	DLL3	21.6994	-0.0224397	5.22105	0.0223151	0.392996
ENSG00000124422	USP22	6682.74	0.00677114	5.22052	0.0223219	0.392996
ENSG00000169139	UBE2V2	959.626	-0.00935583	5.21925	0.0223382	0.392996
ENSG00000110700	RPS13	4340.34	-0.0115313	5.21812	0.0223527	0.392996
ENSG00000136869	TLR4	34.8334	0.0775139	5.21673	0.0223706	0.392996
ENSG00000113734	BNIP1	221.693	-0.0107567	5.21641	0.0223747	0.392996
ENSG00000141380	SS18	2029.94	0.00534872	5.21373	0.0224092	0.392996
ENSG00000145715	RASA1	1334.69	0.0132735	5.21331	0.0224147	0.392996
ENSG00000112182	BACH2	111.591	0.028829	5.21225	0.0224283	0.392996
ENSG00000154079	SDHAF4	123.227	-0.00927761	5.20979	0.02246	0.392996
ENSG00000010322	NISCH	3437.1	0.0101271	5.20769	0.0224871	0.392996
ENSG00000151322	NPAS3	27.6463	0.0287031	5.20634	0.0225047	0.392996
ENSG00000259976		250.489	0.0207028	5.20591	0.0225102	0.392996
ENSG00000134825	TMEM258	772.732	-0.0101766	5.19853	0.0226059	0.392996
ENSG00000087884	AAMDC	388.977	-0.017581	5.19838	0.0226079	0.392996
ENSG00000140990	NDUFB10	2051.2	-0.010335	5.19822	0.02261	0.392996
ENSG00000116138	DNAJC16	880.411	0.0117665	5.19494	0.0226528	0.392996
ENSG00000131381	RBSN	612.908	0.00732014	5.19426	0.0226616	0.392996
ENSG00000153214	TMEM87B	2579.61	0.0173567	5.19291	0.0226792	0.392996
ENSG00000255737	AGAP2-AS1	603.625	-0.015196	5.18586	0.0227714	0.392996
ENSG00000205581	HMGN1	3884.87	-0.00956287	5.18561	0.0227747	0.392996
ENSG00000120068	HOXB8	61.2945	0.0657914	5.18261	0.0228141	0.392996
ENSG00000171984	SHLD1	25.3112	-0.0173305	5.18133	0.0228309	0.392996
ENSG00000167671	UBXN6	3962.16	-0.00771398	5.1794	0.0228563	0.392996
ENSG00000126016	AMOT	281.85	0.020031	5.17894	0.0228623	0.392996
ENSG00000171502	COL24A1	42.331	0.0282399	5.17567	0.0229054	0.392996
ENSG00000100938	GMPR2	1050.91	-0.0055122	5.17444	0.0229216	0.392996
ENSG00000250021	ARPIN-AP3S2	461.363	-0.0115366	5.17355	0.0229333	0.392996
ENSG00000187079	TEAD1	3220.23	0.0146527	5.17312	0.022939	0.392996
ENSG00000149806	FAU	4543.38	-0.0120346	5.16996	0.0229808	0.392996
ENSG00000185627	PSMD13	2369.69	-0.00894227	5.16673	0.0230236	0.392996
ENSG00000167085	PHB1	2854.63	-0.00846832	5.16517	0.0230442	0.392996
ENSG00000165264	NDUFB6	439.911	-0.0116022	5.16475	0.0230498	0.392996
ENSG00000139651	ZNF740	674.98	0.00568414	5.16375	0.023063	0.392996
ENSG00000124614	RPS10	9856.37	-0.0118516	5.16332	0.0230687	0.392996
ENSG00000236871	LINC00106	17.5061	0.0309313	5.16325	0.0230697	0.392996
ENSG00000262413		64.3421	-0.0258165	5.16109	0.0230984	0.392996
ENSG00000143612	C1orf43	3517.15	-0.00692184	5.16091	0.0231008	0.392996
ENSG00000182185	RAD51B	59.3823	-0.0109797	5.15551	0.0231728	0.392996
ENSG00000082781	ITGB5	13003.4	0.0155988	5.15334	0.0232017	0.392996
ENSG00000089009	RPL6	16568.4	-0.0104829	5.15223	0.0232165	0.392996
ENSG00000101191	DIDO1	2067.96	0.00918958	5.15143	0.0232272	0.392996
ENSG00000102908	NFAT5	1863.02	0.019532	5.149	0.0232598	0.392996
ENSG00000124788	ATXN1	987.086	0.00915737	5.14876	0.023263	0.392996
ENSG00000178695	KCTD12	693.468	0.0280235	5.14849	0.0232666	0.392996
ENSG00000217128	FNIP1	1005.19	0.0161735	5.1463	0.023296	0.392996
ENSG00000251079	BMS1P2	15.2407	0.029671	5.14461	0.0233187	0.392996
ENSG00000175334	BANF1	1952.86	-0.0143755	5.14351	0.0233334	0.392996
ENSG00000198746	GPATCH3	273.287	-0.00648065	5.13718	0.0234187	0.392996
ENSG00000106211	HSPB1	15898	-0.0125091	5.13616	0.0234324	0.392996
ENSG00000169689	CENPX	413.855	-0.0163417	5.13248	0.0234821	0.392996
ENSG00000104142	VPS18	2114.74	0.00722981	5.1303	0.0235117	0.392996
ENSG00000158161	EYA3	652.09	0.00729197	5.12888	0.023531	0.392996
ENSG00000165304	MELK	246.748	-0.0178571	5.12779	0.0235457	0.392996
ENSG00000161533	ACOX1	1115.17	0.00983646	5.12743	0.0235505	0.392996
ENSG00000215447		258.516	0.0162554	5.12676	0.0235597	0.392996
ENSG00000101639	CEP192	317.265	0.012088	5.12554	0.0235762	0.392996
ENSG00000177700	POLR2L	4270.9	-0.0120397	5.1214	0.0236325	0.392996
ENSG00000183978	COA3	417.76	-0.0122313	5.11877	0.0236683	0.392996
ENSG00000235884	LINC00941	178.658	-0.011803	5.11535	0.0237151	0.392996
ENSG00000061987	MON2	917.612	0.0124942	5.111	0.0237746	0.392996
ENSG00000115268	RPS15	8437.88	-0.0140314	5.1103	0.0237842	0.392996
ENSG00000134444	RELCH	594.34	0.0116695	5.10858	0.0238078	0.392996
ENSG00000048405	ZNF800	344.264	0.0120896	5.10815	0.0238137	0.392996
ENSG00000157214	STEAP2	109.277	0.0275322	5.10529	0.023853	0.392996
ENSG00000182196	ARL6IP4	2331.58	-0.0126416	5.10353	0.0238772	0.392996
ENSG00000232112	TMA7	2327.92	-0.0116098	5.10302	0.0238842	0.392996
ENSG00000138119	MYOF	14237.9	0.0112366	5.1024	0.0238927	0.392996
ENSG00000007080	CCDC124	1832.32	-0.011375	5.09896	0.0239402	0.392996
ENSG00000145912	NHP2	1573.09	-0.0131159	5.09861	0.0239451	0.392996
ENSG00000135940	COX5B	1828.6	-0.0111053	5.09744	0.0239612	0.392996
ENSG00000170647		45.5755	0.0178061	5.09699	0.0239674	0.392996
ENSG00000131508	UBE2D2	1702.81	-0.00669842	5.09386	0.0240106	0.392996
ENSG00000163207	IVL	16.1688	0.0809412	5.09373	0.0240125	0.392996
ENSG00000173915	ATP5MK	1067.03	-0.0118589	5.09336	0.0240176	0.392996
ENSG00000160211	G6PD	6414.1	-0.012539	5.09151	0.0240433	0.392996
ENSG00000132507	EIF5A	12657.8	-0.0123785	5.0896	0.0240698	0.392996
ENSG00000184983	NDUFA6	971.094	-0.0124592	5.08842	0.0240861	0.392996
ENSG00000223797	ENTPD3-AS1	13.937	-0.0209276	5.08809	0.0240907	0.392996
ENSG00000163848	ZNF148	697.348	0.0117409	5.08645	0.0241135	0.392996
ENSG00000135373	EHF	6.89443	0.0873919	5.08573	0.0241236	0.392996
ENSG00000261428		12.0721	0.0258866	5.08486	0.0241356	0.392996
ENSG00000171448	ZBTB26	119.88	0.0137405	5.08361	0.0241531	0.392996
ENSG00000117118	SDHB	1412.97	-0.00840298	5.08359	0.0241533	0.392996
ENSG00000173812	EIF1	12187.4	-0.0104477	5.08108	0.0241883	0.393127
ENSG00000205352	PRR13	2326.86	-0.00851414	5.07648	0.0242525	0.393127
ENSG00000142303	ADAMTS10	442.474	0.0271854	5.07503	0.0242728	0.393127
ENSG00000183527	PSMG1	632.923	-0.0113587	5.06544	0.0244075	0.393127
ENSG00000100138	SNU13	1948.81	-0.0101569	5.06475	0.0244172	0.393127
ENSG00000111271	ACAD10	408.82	0.00758073	5.06281	0.0244446	0.393127
ENSG00000164182	NDUFAF2	671.407	-0.0118754	5.05962	0.0244897	0.393127
ENSG00000160886	LY6K	29.6614	-0.0530159	5.05625	0.0245372	0.393127
ENSG00000197386	HTT	2197.31	0.00981063	5.05517	0.0245526	0.393127
ENSG00000072501	SMC1A	1599.67	0.00938339	5.05451	0.024562	0.393127
ENSG00000162959	MEMO1	790.177	-0.00764928	5.05361	0.0245747	0.393127
ENSG00000125835	SNRPB	2362.58	-0.012315	5.0533	0.024579	0.393127
ENSG00000092036	HAUS4	200.469	-0.0148501	5.05267	0.024588	0.393127
ENSG00000105583	WDR83OS	1360.07	-0.00998095	5.04952	0.0246328	0.393127
ENSG00000273841	TAF9	1368.31	-0.00859724	5.04827	0.0246505	0.393127
ENSG00000099977	DDT	1103.9	-0.011441	5.0479	0.0246558	0.393127
ENSG00000159352	PSMD4	2405.07	-0.00832942	5.047	0.0246687	0.393127
ENSG00000119328	ABITRAM	320.14	-0.00837267	5.04364	0.0247165	0.393127
ENSG00000137818	RPLP1	29313.7	-0.010868	5.03981	0.0247712	0.393127
ENSG00000188243	COMMD6	823.248	-0.0111438	5.03828	0.0247931	0.393127
ENSG00000118680	MYL12B	8860.04	-0.00979226	5.03426	0.0248508	0.393127
ENSG00000102030	NAA10	2154.41	-0.00870032	5.03223	0.0248799	0.393127
ENSG00000101997	CCDC22	378.788	-0.00689953	5.03149	0.0248905	0.393127
ENSG00000187109	NAP1L1	8760.83	-0.00793225	5.0286	0.024932	0.393127
ENSG00000066379	POLR1H	165.395	-0.0154155	5.02377	0.0250017	0.393127
ENSG00000280341		17.539	0.0237895	5.02305	0.0250121	0.393127
ENSG00000224877	NDUFAF8	731.452	-0.0117136	5.02004	0.0250556	0.393127
ENSG00000106261	ZKSCAN1	1949.34	0.0095102	5.01895	0.0250714	0.393127
ENSG00000120533	ENY2	900.141	-0.00842521	5.01865	0.0250757	0.393127
ENSG00000138650	PCDH10	15311.6	0.0269809	5.01634	0.0251091	0.393127
ENSG00000225921	NOL7	1508.03	-0.00892195	5.01434	0.0251382	0.393127
ENSG00000078177	N4BP2	102.126	0.0208666	5.01194	0.025173	0.393127
ENSG00000176014	TUBB6	11007.7	-0.0103153	5.01181	0.025175	0.393127
ENSG00000279753		32.8733	-0.0285792	5.01139	0.0251811	0.393127
ENSG00000091136	LAMB1	20091.6	0.0100271	5.00976	0.0252048	0.393127
ENSG00000173141	MRPL57	687.982	-0.00939965	5.00455	0.0252808	0.393127
ENSG00000104643	MTMR9	444.778	0.0092125	5.00389	0.0252905	0.393127
ENSG00000189241	TSPYL1	2109.51	0.0118352	5.00378	0.0252921	0.393127
ENSG00000188636	RTL6	1078.09	0.00992545	5.00139	0.0253269	0.393127
ENSG00000272599		19.1533	-0.021754	4.99372	0.0254394	0.393127
ENSG00000136731	UGGT1	5000.98	0.00941761	4.99293	0.0254511	0.393127
ENSG00000197217	ENTPD4	2640.17	0.010185	4.98905	0.0255082	0.393127
ENSG00000261716	H2BC20P	107.504	0.0205219	4.98865	0.0255142	0.393127
ENSG00000129158	SERGEF	187.11	-0.0094067	4.98859	0.0255149	0.393127
ENSG00000248223		338.756	-0.0226346	4.98623	0.0255499	0.393127
ENSG00000178567	EPM2AIP1	719.436	0.0100442	4.98573	0.0255572	0.393127
ENSG00000265962	GACAT2	15.3629	-0.0369321	4.9856	0.0255591	0.393127
ENSG00000183530	PRR14L	974.5	0.0100332	4.98445	0.0255761	0.393127
ENSG00000204946	ZNF783	416.894	0.00910315	4.98413	0.0255809	0.393127
ENSG00000105341	DMAC2	987.998	-0.00820512	4.98396	0.0255833	0.393127
ENSG00000124134	KCNS1	12.053	0.0355144	4.98266	0.0256025	0.393127
ENSG00000185829	ARL17A	280.281	0.017097	4.98152	0.0256195	0.393127
ENSG00000241343	RPL36A	6017.2	-0.012907	4.98023	0.0256386	0.393127
ENSG00000102531	FNDC3A	1161.61	0.0137767	4.97726	0.0256826	0.393127
ENSG00000197265	GTF2E2	932.27	-0.00690173	4.97373	0.0257352	0.393127
ENSG00000167468	GPX4	8163.12	-0.012389	4.97254	0.0257528	0.393127
ENSG00000112964	GHR	85.3606	0.0235076	4.97063	0.0257813	0.393127
ENSG00000241288	LINC02614	111.559	0.0196055	4.96926	0.0258017	0.393127
ENSG00000256073	URB1-AS1	48.6377	-0.0185132	4.96699	0.0258356	0.393127
ENSG00000197779	ZNF81	96.8478	0.0184142	4.9654	0.0258593	0.393127
ENSG00000230844	ZNF674-AS1	69.9363	0.0134061	4.96509	0.0258639	0.393127
ENSG00000198018	ENTPD7	901.232	0.0159782	4.96129	0.0259208	0.393127
ENSG00000228801	PCMTD1-DT	21.0305	0.0168788	4.96003	0.0259398	0.393127
ENSG00000137880	GCHFR	46.143	-0.0193096	4.95965	0.0259455	0.393127
ENSG00000157741	UBN2	310.644	0.0114888	4.95833	0.0259653	0.393127
ENSG00000101773	RBBP8	449.57	-0.00875368	4.95829	0.0259658	0.393127
ENSG00000136485	DCAF7	1938.14	0.00622398	4.95415	0.0260282	0.393127
ENSG00000165898	ISCA2	282.379	-0.0113389	4.95175	0.0260643	0.393127
ENSG00000139437	TCHP	385.403	-0.00878099	4.95083	0.0260781	0.393127
ENSG00000251209	LINC00923	12.0744	0.0263466	4.94762	0.0261267	0.393127
ENSG00000161642	ZNF385A	271.53	-0.0105537	4.94625	0.0261474	0.393127
ENSG00000279192	PWAR5	21.4038	0.032545	4.94573	0.0261552	0.393127
ENSG00000122406	RPL5	15917.5	-0.0101197	4.94377	0.0261848	0.393127
ENSG00000173391	OLR1	529.18	0.0444212	4.94279	0.0261997	0.393127
ENSG00000076382	SPAG5	333.255	-0.0249522	4.94161	0.0262176	0.393127
ENSG00000186010	NDUFA13	2679.74	-0.0107161	4.94147	0.0262198	0.393127
ENSG00000174446	SNAPC5	179.122	-0.012945	4.94077	0.0262303	0.393127
ENSG00000136478	TEX2	2674.17	0.0152099	4.94058	0.0262332	0.393127
ENSG00000119541	VPS4B	823.389	0.00927038	4.93974	0.026246	0.393127
ENSG00000117868	ESYT2	2902.94	0.0068358	4.93944	0.0262505	0.393127
ENSG00000162384	CZIB	626.785	-0.00969456	4.93835	0.0262671	0.393127
ENSG00000137500	CCDC90B	992.625	-0.00847023	4.93819	0.0262695	0.393127
ENSG00000071082	RPL31	7879.31	-0.0114934	4.93808	0.0262712	0.393127
ENSG00000197472	ZNF695	9.47343	-0.0310565	4.93453	0.0263253	0.393127
ENSG00000134548	SPX	50.1039	-0.0407888	4.93416	0.0263308	0.393127
ENSG00000128789	PSMG2	549.474	-0.010826	4.9314	0.026373	0.393127
ENSG00000274414		13.6129	0.0256288	4.93116	0.0263767	0.393127
ENSG00000048162	NOP16	522.184	-0.0112518	4.92809	0.0264235	0.393127
ENSG00000054267	ARID4B	764.934	0.0121031	4.927	0.0264401	0.393127
ENSG00000064999	ANKS1A	619.895	0.0119202	4.92699	0.0264404	0.393127
ENSG00000065057	NTHL1	205.977	-0.0140614	4.92429	0.0264817	0.393127
ENSG00000140451	PIF1	129.57	-0.0148675	4.92328	0.0264972	0.393127
ENSG00000163875	MEAF6	712.97	-0.00645846	4.92277	0.0265049	0.393127
ENSG00000179387	ELMOD2	462.619	0.0119163	4.92193	0.0265179	0.393127
ENSG00000205269	TMEM170B	73.3597	0.0178834	4.91719	0.0265907	0.393127
ENSG00000156973	PDE6D	384.708	-0.00914262	4.91341	0.0266489	0.393127
ENSG00000144029	MRPS5	1093.26	-0.00726654	4.91204	0.0266701	0.393127
ENSG00000077549	CAPZB	7479.55	-0.00829373	4.91033	0.0266966	0.393127
ENSG00000087586	AURKA	258.788	-0.0181308	4.90996	0.0267023	0.393127
ENSG00000104635	SLC39A14	5178.18	0.0152922	4.90011	0.0268549	0.393127
ENSG00000164976	MYORG	289.03	0.0134265	4.89956	0.0268635	0.393127
ENSG00000143633	C1orf131	175.221	-0.0100639	4.89662	0.0269093	0.393127
ENSG00000112739	PRPF4B	1236.06	0.00963559	4.89465	0.02694	0.393127
ENSG00000198331	HYLS1	115.216	-0.0130887	4.89292	0.026967	0.393127
ENSG00000259408		14.7384	0.0216674	4.88961	0.0270188	0.393127
ENSG00000125166	GOT2	2595.37	-0.00517104	4.8891	0.0270268	0.393127
ENSG00000197111	PCBP2	10627.5	-0.00812695	4.88577	0.0270789	0.393127
ENSG00000047936	ROS1	11.1692	0.0475865	4.88537	0.0270852	0.393127
ENSG00000167461	RAB8A	1856.85	-0.00724721	4.88446	0.0270995	0.393127
ENSG00000198931	APRT	1786.43	-0.0126529	4.88325	0.0271185	0.393127
ENSG00000174080	CTSF	863.307	0.0241049	4.88146	0.0271467	0.393127
ENSG00000125611	CHCHD5	301.262	-0.0140543	4.88062	0.0271599	0.393127
ENSG00000196083	IL1RAP	491.374	0.0182484	4.87963	0.0271755	0.393127
ENSG00000143575	HAX1	1727.77	-0.0135725	4.87936	0.0271797	0.393127
ENSG00000268812	LIF-AS2	13.1089	-0.0313783	4.87829	0.0271966	0.393127
ENSG00000259287		10.7179	0.0276708	4.87504	0.0272478	0.393127
ENSG00000111237	VPS29	896.539	-0.0077839	4.8725	0.0272879	0.393127
ENSG00000111669	TPI1	9491.07	-0.0121176	4.87009	0.0273261	0.393127
ENSG00000117450	PRDX1	8377.27	-0.00952766	4.86985	0.0273298	0.393127
ENSG00000258644	SYNJ2BP-COX16	57.2313	-0.0205083	4.86964	0.0273332	0.393127
ENSG00000140443	IGF1R	2188.45	0.0121428	4.8677	0.0273639	0.393127
ENSG00000124198	ARFGEF2	1121.34	0.0163434	4.86448	0.027415	0.393127
ENSG00000180353	HCLS1	153.592	-0.0528929	4.86337	0.0274328	0.393127
ENSG00000060762	MPC1	330.501	-0.00954046	4.86196	0.0274552	0.393127
ENSG00000101843	PSMD10	615.826	-0.00832981	4.86119	0.0274673	0.393127
ENSG00000173218	VANGL1	701.202	0.00864483	4.8611	0.0274688	0.393127
ENSG00000126603	GLIS2	1961.28	-0.0111837	4.85954	0.0274937	0.393127
ENSG00000162244	RPL29	11956.2	-0.0126654	4.85725	0.0275302	0.393127
ENSG00000143341	HMCN1	2827.65	0.0231491	4.85682	0.027537	0.393127
ENSG00000171812	COL8A2	1312.03	0.0260224	4.85386	0.0275843	0.393127
ENSG00000172006	ZNF554	95.6454	0.0106386	4.85322	0.0275945	0.393127
ENSG00000135999	EPC2	414.626	0.00967128	4.8519	0.0276157	0.393127
ENSG00000155034	FBXL18	498.689	0.0143203	4.85052	0.0276378	0.393127
ENSG00000281028		15.5639	0.0923862	4.84626	0.0277062	0.393127
ENSG00000100410	PHF5A	441.562	-0.0106379	4.84085	0.0277932	0.393127
ENSG00000118705	RPN2	12755.8	0.00947735	4.83939	0.0278167	0.393127
ENSG00000185477	GPRIN3	130.319	0.0403213	4.83813	0.027837	0.393127
ENSG00000243449	C4orf48	675.309	-0.0133122	4.83674	0.0278595	0.393127
ENSG00000139233	LLPH	810.293	-0.00528601	4.83567	0.0278768	0.393127
ENSG00000169155	ZBTB43	480.684	0.00966211	4.83294	0.0279209	0.393127
ENSG00000109083	IFT20	783.322	-0.00754625	4.83003	0.0279681	0.393127
ENSG00000141759	TXNL4A	1340.51	-0.00945188	4.82944	0.0279777	0.393127
ENSG00000173171	MTX1	726.359	-0.0100601	4.82865	0.0279905	0.393127
ENSG00000263335		28.4179	0.0319072	4.82759	0.0280077	0.393127
ENSG00000167280	ENGASE	466.101	0.0112863	4.82736	0.0280115	0.393127
ENSG00000186260	MRTFB	290.645	0.0140163	4.8273	0.0280124	0.393127
ENSG00000154309	DISP1	419.391	0.0188696	4.82715	0.0280148	0.393127
ENSG00000174021	GNG5	2710.45	-0.00897265	4.82711	0.0280156	0.393127
ENSG00000120451	SNX19	2529.88	0.00982187	4.82669	0.0280224	0.393127
ENSG00000151229	SLC2A13	191.134	0.0244779	4.82622	0.02803	0.393127
ENSG00000144802	NFKBIZ	1232.56	0.0270675	4.82621	0.0280301	0.393127
ENSG00000229373	LINC00452	12.7417	0.0372762	4.8261	0.0280319	0.393127
ENSG00000144619	CNTN4	27.8872	0.042027	4.82538	0.0280437	0.393127
ENSG00000005810	MYCBP2	1847.62	0.0177477	4.8251	0.0280483	0.393127
ENSG00000242419	PCDHGC4	15.0885	0.0327901	4.82499	0.0280501	0.393127
ENSG00000177335	LINC02904	15.1251	0.0405445	4.82317	0.0280797	0.393127
ENSG00000152127	MGAT5	2669.96	0.0182734	4.81986	0.0281336	0.393127
ENSG00000028839	TBPL1	272.984	-0.00884331	4.81969	0.0281365	0.393127
ENSG00000116731	PRDM2	909.16	0.0107781	4.81947	0.02814	0.393127
ENSG00000177105	RHOG	1283.64	-0.00875928	4.8194	0.0281412	0.393127
ENSG00000129933	MAU2	1417.27	0.00691822	4.81908	0.0281464	0.393127
ENSG00000189212	DPY19L2P1	59.6631	0.0206406	4.8177	0.028169	0.393127
ENSG00000110063	DCPS	360.734	-0.0140498	4.81752	0.0281719	0.393127
ENSG00000241020	RPL32P24	10.594	-0.037021	4.81181	0.0282653	0.394087
ENSG00000132640	BTBD3	439.799	0.0146929	4.80678	0.028348	0.394698
ENSG00000063177	RPL18	10197.8	-0.0132592	4.80614	0.0283586	0.394698
ENSG00000196275	GTF2IRD2	216.811	0.0131289	4.80009	0.0284582	0.39528
ENSG00000115761	NOL10	736.346	-0.00629251	4.79814	0.0284904	0.39528
ENSG00000084072	PPIE	588.236	-0.0093131	4.79783	0.0284957	0.39528
ENSG00000068654	POLR1A	2041.53	0.00691857	4.79761	0.0284993	0.39528
ENSG00000090615	GOLGA3	5173.28	0.00732649	4.79547	0.0285346	0.395282
ENSG00000121211	MND1	15.9162	-0.0353888	4.79461	0.028549	0.395282
ENSG00000105185	PDCD5	1492.87	-0.0116747	4.79021	0.0286219	0.395491
ENSG00000280038	DNM1P41	20.7188	0.022162	4.7845	0.028717	0.395491
ENSG00000000460	C1orf112	82.1646	-0.0135808	4.78239	0.0287522	0.395491
ENSG00000186496	ZNF396	21.1537	-0.016209	4.78169	0.0287639	0.395491
ENSG00000164919	COX6C	1151.21	-0.0113086	4.78122	0.0287718	0.395491
ENSG00000107130	NCS1	3652.65	-0.00678428	4.78005	0.0287912	0.395491
ENSG00000136718	IMP4	1354.75	-0.00865879	4.77919	0.0288057	0.395491
ENSG00000132549	VPS13B	844.955	0.0145113	4.7789	0.0288105	0.395491
ENSG00000071539	TRIP13	226.73	-0.0204388	4.7784	0.0288189	0.395491
ENSG00000003393	ALS2	893.144	0.00775337	4.77814	0.0288233	0.395491
ENSG00000067248	DHX29	1002.95	0.0101823	4.77677	0.0288463	0.395491
ENSG00000138061	CYP1B1	906.314	0.057695	4.77093	0.0289442	0.395491
ENSG00000127663	KDM4B	1553.36	0.00793046	4.76712	0.0290084	0.395491
ENSG00000069869	NEDD4	1342.63	0.013016	4.76666	0.0290161	0.395491
ENSG00000108788	MLX	1204.61	-0.00635683	4.76299	0.0290781	0.395491
ENSG00000256537	SMIM10L1	855.302	-0.00731999	4.76139	0.0291051	0.395491
ENSG00000113068	PFDN1	1441.08	-0.0109704	4.76119	0.0291084	0.395491
ENSG00000181029	TRAPPC5	1311.86	-0.0121842	4.7609	0.0291134	0.395491
ENSG00000270574		11.164	0.0280169	4.75939	0.0291388	0.395491
ENSG00000215190	LINC00680	222.566	0.00952412	4.75853	0.0291535	0.395491
ENSG00000124787	RPP40	153.766	-0.0130719	4.75706	0.0291783	0.395491
ENSG00000025800	KPNA6	2687.89	0.00571871	4.75636	0.0291902	0.395491
ENSG00000163946	TASOR	878.886	0.00998827	4.75578	0.0292	0.395491
ENSG00000145494	NDUFS6	1188.58	-0.010191	4.75457	0.0292205	0.395491
ENSG00000213906	LTB4R2	82.4786	0.018975	4.7531	0.0292455	0.395491
ENSG00000111652	COPS7A	1775.04	-0.00637785	4.75268	0.0292527	0.395491
ENSG00000136451	VEZF1	894.438	0.00869509	4.7516	0.029271	0.395491
ENSG00000022567	SLC45A4	351.505	0.00865943	4.75049	0.02929	0.395491
ENSG00000087086	FTL	128184	-0.0118311	4.74939	0.0293086	0.395491
ENSG00000112697	TMEM30A	4919.47	0.013964	4.74553	0.0293744	0.395491
ENSG00000280355		45.5837	0.0223033	4.74528	0.0293787	0.395491
ENSG00000137288	UQCC2	747.756	-0.0123486	4.74392	0.0294019	0.395491
ENSG00000125901	MRPS26	543.566	-0.0112807	4.73739	0.0295139	0.395491
ENSG00000157911	PEX10	796.578	-0.00779195	4.73594	0.0295388	0.395491
ENSG00000166529	ZSCAN21	170.269	-0.00907852	4.73536	0.0295487	0.395491
ENSG00000138495	COX17	397.845	-0.0134375	4.73528	0.02955	0.395491
ENSG00000185437	SH3BGR	51.8943	-0.0213438	4.73455	0.0295626	0.395491
ENSG00000026652	AGPAT4	389.248	0.011234	4.73402	0.0295716	0.395491
ENSG00000100097	LGALS1	29909	-0.0139562	4.73317	0.0295863	0.395491
ENSG00000148737	TCF7L2	884.829	0.0118668	4.73299	0.0295894	0.395491
ENSG00000160781	PAQR6	30.1825	0.0217232	4.73172	0.0296112	0.395491
ENSG00000174130	TLR6	71.6309	0.0135304	4.72922	0.0296544	0.395491
ENSG00000144895	EIF2A	1761.97	-0.00773761	4.72753	0.0296834	0.395491
ENSG00000255690	TRIL	281.806	0.0516534	4.72728	0.0296878	0.395491
ENSG00000106803	SEC61B	1674.67	-0.0120531	4.72661	0.0296994	0.395491
ENSG00000176101	SSNA1	1224.83	-0.0116959	4.72471	0.0297322	0.395491
ENSG00000100347	SAMM50	1097.84	-0.00620177	4.72459	0.0297343	0.395491
ENSG00000149187	CELF1	1959.47	0.00500007	4.72119	0.0297932	0.395491
ENSG00000142507	PSMB6	2049.96	-0.0105655	4.72102	0.0297961	0.395491
ENSG00000168675	LDLRAD4	196.537	0.0472045	4.71725	0.0298615	0.395491
ENSG00000084652	TXLNA	3513.92	0.00515743	4.71663	0.0298723	0.395491
ENSG00000135540	NHSL1	795.303	0.0121672	4.71623	0.0298792	0.395491
ENSG00000141933	TPGS1	482.281	-0.0107504	4.71607	0.0298819	0.395491
ENSG00000148334	PTGES2	1246.67	-0.0092786	4.71499	0.0299007	0.395491
ENSG00000279689		21.809	-0.0155467	4.70954	0.0299958	0.395897
ENSG00000127445	PIN1	1265.73	-0.00959342	4.70949	0.0299966	0.395897
ENSG00000070413	DGCR2	3332.11	0.0078814	4.70729	0.0300349	0.395897
ENSG00000196455	PIK3R4	556.225	0.00890528	4.7062	0.030054	0.395897
ENSG00000135763	URB2	318.366	0.00640775	4.70572	0.0300625	0.395897
ENSG00000260751		19.6863	0.0244208	4.70388	0.0300947	0.395897
ENSG00000142530	GARIN5A	19.7774	-0.0195062	4.70259	0.0301172	0.395897
ENSG00000257267	ZNF271P	550.511	-0.00848944	4.6993	0.0301748	0.395897
ENSG00000246705	H2AJ	1342.54	-0.0119549	4.69912	0.030178	0.395897
ENSG00000156298	TSPAN7	104.925	0.0466154	4.69786	0.0302003	0.395897
ENSG00000141367	CLTC	13215.3	0.00927151	4.69522	0.0302466	0.395897
ENSG00000127884	ECHS1	2019.94	-0.00840577	4.69379	0.0302718	0.395897
ENSG00000100568	VTI1B	1779.59	-0.00735489	4.6935	0.030277	0.395897
ENSG00000174744	BRMS1	1004.37	-0.00968877	4.69293	0.030287	0.395897
ENSG00000092978	GPATCH2	260.203	0.00788628	4.69102	0.0303206	0.395897
ENSG00000186340	THBS2	38946.3	0.0182381	4.6902	0.0303351	0.395897
ENSG00000283088		18.1533	0.0678916	4.68887	0.0303586	0.395897
ENSG00000056050	HPF1	258.501	-0.0125806	4.68683	0.0303947	0.395897
ENSG00000153790	C7orf31	145.118	-0.0127913	4.68463	0.0304336	0.395897
ENSG00000275591	XKR5	16.0914	0.0323408	4.68092	0.0304993	0.395897
ENSG00000171453	POLR1C	436.084	-0.00841295	4.67879	0.0305372	0.395897
ENSG00000198589	LRBA	774.257	0.0126016	4.67783	0.0305544	0.395897
ENSG00000169684	CHRNA5	34.8929	-0.0225563	4.67754	0.0305595	0.395897
ENSG00000266402	SNHG25	11.9275	-0.0300304	4.67677	0.0305732	0.395897
ENSG00000196968	FUT11	717.785	0.011078	4.67667	0.0305749	0.395897
ENSG00000178980	SELENOW	2043.7	-0.011708	4.67663	0.0305756	0.395897
ENSG00000120051	CFAP58	18.4911	0.0252623	4.67322	0.0306364	0.396256
ENSG00000137504	CREBZF	766.976	0.0102311	4.6723	0.0306529	0.396256
ENSG00000186532	SMYD4	278.758	0.00788856	4.66897	0.0307123	0.396436
ENSG00000085117	CD82	3094.16	0.0228377	4.66805	0.0307288	0.396436
ENSG00000267787		14.0644	0.0212467	4.66735	0.0307413	0.396436
ENSG00000162222	TTC9C	483.39	-0.00663452	4.66552	0.0307741	0.396539
ENSG00000171848	RRM2	592.452	-0.0363988	4.65829	0.0309039	0.396928
ENSG00000132010	ZNF20	30.8362	0.0282242	4.65828	0.0309041	0.396928
ENSG00000128512	DOCK4	149.765	0.0245871	4.65762	0.0309159	0.396928
ENSG00000138794	CASP6	247.049	-0.0101334	4.65689	0.0309291	0.396928
ENSG00000125484	GTF3C4	655.532	0.0090738	4.65203	0.0310168	0.396928
ENSG00000100427	MLC1	56.0409	-0.0456787	4.6516	0.0310247	0.396928
ENSG00000265681	RPL17	13353.9	-0.0104183	4.64888	0.0310738	0.396928
ENSG00000145246	ATP10D	1976.51	0.0188861	4.64835	0.0310835	0.396928
ENSG00000171084	FAM86JP	78.8354	-0.0305203	4.64767	0.0310958	0.396928
ENSG00000123066	MED13L	1911.01	0.0108902	4.64723	0.0311038	0.396928
ENSG00000182551	ADI1	2562.3	-0.00802692	4.64587	0.0311283	0.396928
ENSG00000100297	MCM5	466.067	-0.0249491	4.64565	0.0311323	0.396928
ENSG00000182712	CMC4	160.81	-0.0142291	4.64467	0.0311501	0.396928
ENSG00000021574	SPAST	305.727	0.0143227	4.64444	0.0311544	0.396928
ENSG00000263001	GTF2I	3937.2	0.0107027	4.64319	0.0311769	0.396928
ENSG00000198108	CHSY3	692.349	0.0149271	4.64179	0.0312025	0.396937
ENSG00000170743	SYT9	22.9747	0.0414217	4.63952	0.0312438	0.397076
ENSG00000128683	GAD1	15.3532	0.0565461	4.6366	0.031297	0.397076
ENSG00000178199	ZC3H12D	13.252	0.0237619	4.63431	0.0313388	0.397076
ENSG00000127540	UQCR11	2152.47	-0.0112423	4.63116	0.0313963	0.397076
ENSG00000072364	AFF4	3221.88	0.0163409	4.63066	0.0314054	0.397076
ENSG00000130731	METTL26	1099.53	-0.0139981	4.63059	0.0314068	0.397076
ENSG00000131242	RAB11FIP4	42.4821	-0.0215214	4.63054	0.0314077	0.397076
ENSG00000060718	COL11A1	19086.6	0.023124	4.63029	0.0314122	0.397076
ENSG00000197608	ZNF841	317.024	0.0117496	4.62861	0.0314429	0.39715
ENSG00000170153	RNF150	442.06	0.0259539	4.62578	0.031495	0.397313
ENSG00000174792	ODAPH	53.3885	0.0667241	4.62358	0.0315353	0.397313
ENSG00000267454	ZNF582-DT	24.1335	-0.0218698	4.62294	0.0315472	0.397313
ENSG00000172426	RSPH9	18.0493	-0.0241719	4.62164	0.031571	0.397313
ENSG00000182973	CNOT10	371.598	-0.00728295	4.6186	0.031627	0.397313
ENSG00000250182	EEF1A1P13	12.2324	0.0310472	4.61752	0.0316469	0.397313
ENSG00000198825	INPP5F	1020.69	0.013993	4.61702	0.0316562	0.397313
ENSG00000204619	PPP1R11	1271.67	-0.00726332	4.61331	0.0317248	0.397313
ENSG00000074071	MRPS34	1577.21	-0.0108034	4.6119	0.0317507	0.397313
ENSG00000257315	ZBED6	199.55	0.0460628	4.61133	0.0317615	0.397313
ENSG00000165271	NOL6	2405.8	0.00951401	4.61084	0.0317705	0.397313
ENSG00000136146	MED4	516.587	-0.00762563	4.61036	0.0317793	0.397313
ENSG00000132541	RIDA	172.469	-0.00997319	4.60866	0.0318109	0.397313
ENSG00000176542	USF3	272.165	0.0153701	4.60693	0.031843	0.397313
ENSG00000122026	RPL21	7173.12	-0.00920744	4.60663	0.0318486	0.397313
ENSG00000170889	RPS9	10131.8	-0.0124514	4.60636	0.0318536	0.397313
ENSG00000163597	SNHG16	2644.22	-0.00804435	4.60344	0.0319078	0.397678
ENSG00000151617	EDNRA	65.4586	0.0304406	4.59752	0.0320182	0.398281
ENSG00000147604	RPL7	14520.9	-0.0098432	4.59513	0.0320629	0.398281
ENSG00000115661	STK16	475.545	-0.00735231	4.59357	0.0320922	0.398281
ENSG00000174197	MGA	711.6	0.0113032	4.59323	0.0320985	0.398281
ENSG00000110367	DDX6	2931.33	0.00861227	4.59268	0.0321088	0.398281
ENSG00000177119	ANO6	3254.54	0.0126491	4.59201	0.0321213	0.398281
ENSG00000054392	HHAT	258.232	0.0164222	4.59007	0.0321578	0.398281
ENSG00000138758	SEPTIN11	7207.57	0.0096407	4.58957	0.0321671	0.398281
ENSG00000114779	ABHD14B	1064.87	-0.00871694	4.58249	0.0323003	0.398281
ENSG00000175573	C11orf68	1206.49	-0.00894278	4.58103	0.0323278	0.398281
ENSG00000148335	NTMT1	880.896	-0.00925635	4.58082	0.0323317	0.398281
ENSG00000169855	ROBO1	2464.84	0.0179363	4.5807	0.032334	0.398281
ENSG00000109606	DHX15	2226.8	0.00596518	4.58048	0.0323382	0.398281
ENSG00000084093	REST	746.397	0.0129759	4.57813	0.0323826	0.398281
ENSG00000023171	GRAMD1B	190.132	0.0211549	4.57428	0.0324554	0.398281
ENSG00000141026	MED9	240.678	-0.00677975	4.57288	0.0324819	0.398281
ENSG00000100300	TSPO	5860.15	-0.0117823	4.57222	0.0324945	0.398281
ENSG00000245910	SNHG6	549.81	-0.0111892	4.5715	0.0325082	0.398281
ENSG00000162804	SNED1	19.6175	0.0526064	4.5686	0.0325632	0.398281
ENSG00000142188	TMEM50B	642.574	0.0202109	4.56852	0.0325647	0.398281
ENSG00000167088	SNRPD1	786.475	-0.0113295	4.56728	0.0325883	0.398281
ENSG00000259198		229.7	-0.0196096	4.56655	0.0326021	0.398281
ENSG00000119782	FKBP1B	104.224	-0.014241	4.56635	0.0326059	0.398281
ENSG00000008324	SS18L2	155.491	-0.0118812	4.56481	0.0326352	0.398281
ENSG00000205213	LGR4	421.853	0.0199256	4.56059	0.0327158	0.398281
ENSG00000279425		22.8925	0.0263241	4.55971	0.0327325	0.398281
ENSG00000149925	ALDOA	42280.5	-0.00838499	4.55892	0.0327478	0.398281
ENSG00000173947	PIFO	14.6128	0.0251449	4.55778	0.0327694	0.398281
ENSG00000070476	ZXDC	413.179	0.00810207	4.55518	0.0328192	0.398281
ENSG00000107331	ABCA2	2671.42	0.00931821	4.55417	0.0328387	0.398281
ENSG00000135912	TTLL4	629.428	0.00841093	4.55405	0.0328409	0.398281
ENSG00000229124	VIM-AS1	1114.72	-0.0176958	4.55182	0.0328837	0.398281
ENSG00000161981	SNRNP25	349.027	-0.0125703	4.55006	0.0329177	0.398281
ENSG00000197933	ZNF823	71.1793	-0.0113779	4.54916	0.0329349	0.398281
ENSG00000144445	KANSL1L	192.09	0.0128011	4.54908	0.0329364	0.398281
ENSG00000253846	PCDHGA10	618.354	0.0207503	4.54834	0.0329507	0.398281
ENSG00000119929	CUTC	147.791	-0.00945647	4.54741	0.0329686	0.398281
ENSG00000130518	IQCN	73.5648	-0.0271027	4.54735	0.0329697	0.398281
ENSG00000215790	SLC35E2A	112.196	0.0157908	4.54618	0.0329924	0.398281
ENSG00000168028	RPSA	19000.5	-0.0134122	4.54515	0.0330122	0.398281
ENSG00000157654	PALM2AKAP2	266.573	0.0317283	4.5431	0.0330516	0.398281
ENSG00000182326	C1S	7706.44	0.0187263	4.54304	0.0330528	0.398281
ENSG00000171310	CHST11	415.074	0.0244479	4.54225	0.033068	0.398281
ENSG00000117010	ZNF684	37.1228	-0.012786	4.54121	0.0330882	0.398281
ENSG00000156482	RPL30	7768.86	-0.00969099	4.53693	0.033171	0.398281
ENSG00000145860	RNF145	1361.64	0.0123596	4.53585	0.033192	0.398281
ENSG00000102309	PIN4	334.51	-0.0125106	4.5351	0.0332065	0.398281
ENSG00000170325	PRDM10	270.654	0.0149679	4.53425	0.033223	0.398281
ENSG00000182173	TSEN54	277.152	-0.00863836	4.53418	0.0332243	0.398281
ENSG00000170315	UBB	13048.5	-0.00813344	4.53336	0.0332403	0.398281
ENSG00000168061	SAC3D1	276.038	-0.0123989	4.53316	0.0332442	0.398281
ENSG00000148950	IMMP1L	31.9404	-0.0170116	4.53273	0.0332524	0.398281
ENSG00000240764	PCDHGC5	80.5656	0.024108	4.52706	0.0333629	0.398652
ENSG00000117114	ADGRL2	1013.9	0.0156092	4.52513	0.0334005	0.398652
ENSG00000129535	NRL	18.9895	-0.0197237	4.52195	0.0334627	0.398652
ENSG00000125817	CENPB	2658.71	-0.00870996	4.52005	0.0334998	0.398652
ENSG00000136152	COG3	664.862	0.0067444	4.52002	0.0335004	0.398652
ENSG00000109320	NFKB1	1729.01	0.0124232	4.51897	0.033521	0.398652
ENSG00000111716	LDHB	7132.99	-0.00792258	4.51875	0.0335254	0.398652
ENSG00000108106	UBE2S	2680.98	-0.0163906	4.51536	0.0335918	0.398652
ENSG00000125454	SLC25A19	116.878	-0.0125073	4.51498	0.0335993	0.398652
ENSG00000165629	ATP5F1C	2422.43	-0.00970335	4.51395	0.0336196	0.398652
ENSG00000127947	PTPN12	1796.14	0.0093306	4.51336	0.0336311	0.398652
ENSG00000123636	BAZ2B	422.801	0.0144603	4.51203	0.0336573	0.398652
ENSG00000198356	GET3	1755.09	-0.00810796	4.51057	0.0336859	0.398652
ENSG00000160075	SSU72	2638.25	-0.00763931	4.51037	0.03369	0.398652
ENSG00000278727		20.1062	0.0271551	4.5092	0.0337131	0.398652
ENSG00000184719	RNLS	97.6682	-0.0113468	4.50835	0.0337297	0.398652
ENSG00000214026	MRPL23	906.082	-0.0148261	4.50828	0.0337311	0.398652
ENSG00000120327	PCDHB14	25.1246	0.0349426	4.50407	0.0338142	0.398652
ENSG00000115526	CHST10	395.195	0.00676907	4.50357	0.0338242	0.398652
ENSG00000169905	TOR1AIP2	2250.01	0.00687033	4.50307	0.033834	0.398652
ENSG00000177889	UBE2N	1615.69	-0.00797355	4.50142	0.0338667	0.398652
ENSG00000242588		81.2559	0.0241077	4.50075	0.0338801	0.398652
ENSG00000260267		161.225	0.0106864	4.50067	0.0338816	0.398652
ENSG00000100344	PNPLA3	118.333	0.0240414	4.50056	0.0338837	0.398652
ENSG00000112655	PTK7	13452.9	0.0136332	4.49938	0.0339071	0.398652
ENSG00000168137	SETD5	2934.56	0.00538561	4.49043	0.0340852	0.400221
ENSG00000007545	CRAMP1	689.057	0.00771417	4.48761	0.0341413	0.400221
ENSG00000178096	BOLA1	90.1011	-0.0123035	4.48588	0.0341759	0.400221
ENSG00000177234	LINC01561	29.8135	0.0289278	4.48546	0.0341844	0.400221
ENSG00000107854	TNKS2	1461.43	0.0125832	4.48479	0.0341977	0.400221
ENSG00000068976	PYGM	22.6772	-0.0376798	4.48229	0.0342478	0.400221
ENSG00000128951	DUT	724.907	-0.0079254	4.48188	0.034256	0.400221
ENSG00000170296	GABARAP	6187.46	-0.00866787	4.47956	0.0343025	0.400221
ENSG00000088833	NSFL1C	1976.72	-0.00583209	4.47943	0.0343052	0.400221
ENSG00000145495	MARCHF6	2360.69	0.0105832	4.47691	0.0343558	0.400221
ENSG00000137876	RSL24D1	1319.75	-0.0116548	4.47641	0.0343657	0.400221
ENSG00000151388	ADAMTS12	6521.02	0.0211309	4.47574	0.0343793	0.400221
ENSG00000131475	VPS25	990.512	-0.00938915	4.47555	0.0343832	0.400221
ENSG00000242372	EIF6	2938.35	-0.00900169	4.47471	0.0344	0.400221
ENSG00000115239	ASB3	345.986	0.00537103	4.4739	0.0344163	0.400221
ENSG00000100888	CHD8	2284.38	0.00535071	4.47077	0.0344794	0.400663
ENSG00000228727	SAPCD1	20.7555	0.0252282	4.46812	0.0345329	0.400919
ENSG00000125107	CNOT1	3635.87	0.00798342	4.4663	0.0345698	0.400919
ENSG00000116120	FARSB	981.377	-0.00937619	4.46475	0.0346012	0.400919
ENSG00000083845	RPS5	7217.27	-0.0107584	4.46472	0.0346018	0.400919
ENSG00000103148	NPRL3	1366.73	-0.0097162	4.46282	0.0346403	0.401075
ENSG00000258232		28.8206	-0.0284053	4.46097	0.0346777	0.401217
ENSG00000230438	SERPINB9P1	15.3192	-0.0601059	4.45768	0.0347446	0.401526
ENSG00000138433	CIR1	784.082	-0.00769799	4.45719	0.0347547	0.401526
ENSG00000114127	XRN1	488.873	0.0150157	4.45464	0.0348065	0.401834
ENSG00000143106	PSMA5	1709.68	-0.00857111	4.45321	0.0348358	0.401843
ENSG00000149968	MMP3	221.226	0.0728848	4.45214	0.0348575	0.401843
ENSG00000175895	PLEKHF2	132.769	0.010125	4.44549	0.0349936	0.40312
ENSG00000263563	UBBP4	34.3117	-0.0143321	4.44277	0.0350493	0.40347
ENSG00000103769	RAB11A	2352.55	-0.00645737	4.4388	0.035131	0.40412
ENSG00000143061	IGSF3	130.554	0.0356293	4.43619	0.0351847	0.404447
ENSG00000159079	CFAP298	653	-0.00703538	4.43125	0.0352866	0.405299
ENSG00000105193	RPS16	9817.18	-0.0115549	4.42665	0.0353819	0.405299
ENSG00000227518	MIR1302-9HG	13.2328	0.026265	4.42637	0.0353877	0.405299
ENSG00000153015	CWC27	558.308	-0.00839851	4.4248	0.0354202	0.405299
ENSG00000196428	TSC22D2	1678.38	0.0105081	4.42417	0.0354334	0.405299
ENSG00000134146	DPH6	75.8132	-0.010501	4.42182	0.0354822	0.405299
ENSG00000023191	RNH1	7319.31	-0.0116143	4.42081	0.0355032	0.405299
ENSG00000259539		22.9293	0.0165343	4.4205	0.0355096	0.405299
ENSG00000101126	ADNP	1787.5	0.00526966	4.4198	0.0355242	0.405299
ENSG00000232593	KANTR	70.5878	-0.0225019	4.41941	0.0355323	0.405299
ENSG00000188786	MTF1	483.912	0.00894301	4.41858	0.0355495	0.405299
ENSG00000108518	PFN1	38032.9	-0.0121654	4.4149	0.0356263	0.405299
ENSG00000224238	WARS2-IT1	12.4875	0.0184519	4.41319	0.0356621	0.405299
ENSG00000086232	EIF2AK1	3405.54	-0.00629299	4.41204	0.0356861	0.405299
ENSG00000188157	AGRN	17287.5	0.00899681	4.412	0.035687	0.405299
ENSG00000198546	ZNF511	403.762	-0.0126666	4.41121	0.0357035	0.405299
ENSG00000170906	NDUFA3	938.972	-0.0118104	4.40961	0.0357369	0.405299
ENSG00000187953	PMS2CL	279.87	-0.00785492	4.40792	0.0357725	0.405299
ENSG00000104825	NFKBIB	734.637	-0.00941747	4.40791	0.0357726	0.405299
ENSG00000269001	ZNF818P	29.521	0.0289236	4.40522	0.0358292	0.405299
ENSG00000261167		23.5821	0.0157724	4.40408	0.0358531	0.405299
ENSG00000128917	DLL4	15.5428	0.0688439	4.40319	0.0358718	0.405299
ENSG00000143970	ASXL2	862.341	0.0137769	4.40015	0.0359358	0.405299
ENSG00000136536	MARCHF7	1317.25	0.00852954	4.39894	0.0359613	0.405299
ENSG00000131023	LATS1	533.051	0.0136366	4.39028	0.0361444	0.405299
ENSG00000059145	UNKL	604.755	0.00827184	4.38971	0.0361565	0.405299
ENSG00000054148	PHPT1	2061.23	-0.0107186	4.38947	0.0361614	0.405299
ENSG00000138382	METTL5	423.185	-0.0112802	4.38867	0.0361786	0.405299
ENSG00000279232		16.6842	0.0248261	4.38865	0.0361789	0.405299
ENSG00000106330	MOSPD3	423.402	-0.0104285	4.3885	0.0361821	0.405299
ENSG00000148948	LRRC4C	20.0961	0.055281	4.38831	0.0361862	0.405299
ENSG00000184588	PDE4B	78.2563	0.0317743	4.38657	0.0362232	0.405299
ENSG00000130544	ZNF557	191.607	0.00826239	4.3859	0.0362373	0.405299
ENSG00000258704	SRP54-AS1	9.91875	-0.0229346	4.38378	0.0362825	0.405299
ENSG00000172354	GNB2	6465.76	-0.00968116	4.38299	0.0362993	0.405299
ENSG00000118596	SLC16A7	283.699	0.0221261	4.38295	0.0363	0.405299
ENSG00000260565	ERVK13-1	194.175	0.017076	4.38045	0.0363533	0.405299
ENSG00000161980	POLR3K	241.139	-0.00983134	4.38026	0.0363574	0.405299
ENSG00000235194	PPP1R3E	108.552	0.00913889	4.38003	0.0363623	0.405299
ENSG00000280614		200.744	-0.028777	4.37982	0.0363669	0.405299
ENSG00000280800		200.744	-0.028777	4.37982	0.0363669	0.405299
ENSG00000281181		200.744	-0.028777	4.37982	0.0363669	0.405299
ENSG00000147403	RPL10	18456.2	-0.0111852	4.37978	0.0363677	0.405299
ENSG00000099795	NDUFB7	1586.87	-0.0103359	4.37944	0.0363749	0.405299
ENSG00000100605	ITPK1	1329.87	-0.011151	4.37474	0.0364754	0.405501
ENSG00000124356	STAMBP	763.542	-0.00623257	4.37388	0.0364937	0.405501
ENSG00000239672	NME1	2228.18	-0.0132109	4.37322	0.0365079	0.405501
ENSG00000119760	SUPT7L	1101.52	0.00537288	4.37189	0.0365364	0.405501
ENSG00000177694	NAALADL2	172.921	0.0160287	4.3717	0.0365406	0.405501
ENSG00000168772	CXXC4	13.4465	0.0347178	4.37148	0.0365453	0.405501
ENSG00000164967	RPP25L	192.168	-0.0125486	4.36927	0.0365926	0.405574
ENSG00000204922	UQCC3	239.508	-0.0119062	4.36773	0.0366257	0.405574
ENSG00000089154	GCN1	5110.27	0.00728513	4.36634	0.0366556	0.405574
ENSG00000259342		25.1013	0.0201027	4.36552	0.0366733	0.405574
ENSG00000131143	COX4I1	4778.37	-0.00883822	4.36473	0.0366904	0.405574
ENSG00000168301	KCTD6	136.542	-0.00858388	4.36357	0.0367153	0.405574
ENSG00000103319	EEF2K	795.58	0.00755611	4.36291	0.0367296	0.405574
ENSG00000141971	MVB12A	688.298	-0.00999535	4.35893	0.0368155	0.406024
ENSG00000166228	PCBD1	858.469	-0.0101904	4.35644	0.0368693	0.406024
ENSG00000124767	GLO1	1803.81	-0.00906879	4.35542	0.0368913	0.406024
ENSG00000136897	MRPL50	296.236	-0.0066564	4.35391	0.0369241	0.406024
ENSG00000196167	COLCA1	17.1907	0.0196447	4.35383	0.0369257	0.406024
ENSG00000103018	CYB5B	1703.54	-0.00813452	4.35379	0.0369266	0.406024
ENSG00000004478	FKBP4	2106.24	-0.00797586	4.3528	0.0369482	0.406024
ENSG00000197694	SPTAN1	13697.6	0.00699019	4.3514	0.0369784	0.406077
ENSG00000203819		11.0052	0.064901	4.34568	0.0371029	0.406922
ENSG00000102007	PLP2	3045.17	-0.0134194	4.34381	0.0371438	0.406922
ENSG00000135093	USP30	286.446	0.00821228	4.34364	0.0371475	0.406922
ENSG00000144331	ZNF385B	11.2703	0.0759122	4.34319	0.0371573	0.406922
ENSG00000115128	SF3B6	1159.37	-0.00780747	4.33893	0.0372504	0.407662
ENSG00000149658	YTHDF1	1304.94	0.00469515	4.33667	0.0372998	0.407923
ENSG00000140396	NCOA2	372.345	0.0158795	4.33483	0.0373401	0.408085
ENSG00000145675	PIK3R1	625.432	0.0136446	4.33341	0.0373713	0.408147
ENSG00000164687	FABP5	623.587	-0.0155848	4.33218	0.0373983	0.408163
ENSG00000112419	PHACTR2	1002.85	0.0159681	4.33064	0.0374321	0.408252
ENSG00000128245	YWHAH	2659.27	-0.00885626	4.32856	0.037478	0.408474
ENSG00000174482	LINGO2	208.321	0.0307601	4.32709	0.0375102	0.408547
ENSG00000106355	LSM5	254.228	-0.0106402	4.32407	0.0375768	0.408807
ENSG00000234327	ZNF232-AS1	34.6669	-0.0220985	4.32369	0.0375853	0.408807
ENSG00000173163	COMMD1	453.255	-0.0110537	4.32137	0.0376367	0.409087
ENSG00000113583	C5orf15	1933.25	0.0102545	4.31256	0.037832	0.410673
ENSG00000269399		12.2672	0.0324002	4.31247	0.037834	0.410673
ENSG00000165752	STK32C	207.491	-0.0128847	4.30776	0.0379388	0.410834
ENSG00000141522	ARHGDIA	14806.3	-0.00971706	4.3076	0.0379426	0.410834
ENSG00000255455		200.048	0.0123684	4.30652	0.0379665	0.410834
ENSG00000140538	NTRK3	92.9265	-0.0331612	4.30549	0.0379895	0.410834
ENSG00000204120	GIGYF2	1812.85	0.00722601	4.30468	0.0380076	0.410834
ENSG00000165379	LRFN5	55.5403	0.0283443	4.30311	0.0380428	0.410834
ENSG00000258839	MC1R	206.151	0.0167921	4.30275	0.0380508	0.410834
ENSG00000163635	ATXN7	466.168	0.00862889	4.30192	0.0380694	0.410834
ENSG00000124789	NUP153	1172.05	0.00741963	4.29992	0.0381142	0.410834
ENSG00000182578	CSF1R	15.7519	0.0327927	4.29878	0.0381397	0.410834
ENSG00000256087	ZNF432	293.92	0.0162262	4.29824	0.0381518	0.410834
ENSG00000106052	TAX1BP1	4898.92	-0.00932563	4.29716	0.0381761	0.410834
ENSG00000164904	ALDH7A1	1121.06	-0.0120498	4.29685	0.038183	0.410834
ENSG00000176058	TPRN	549.168	-0.00947115	4.29437	0.0382387	0.411141
ENSG00000157657	ZNF618	1166.8	0.0097864	4.29281	0.0382738	0.411141
ENSG00000112624	BICRAL	300.777	0.00795936	4.29215	0.0382888	0.411141
ENSG00000177302	TOP3A	466.355	0.00734972	4.28527	0.038444	0.412327
ENSG00000129292	PHF20L1	1100.2	0.00958301	4.2849	0.0384522	0.412327
ENSG00000165416	SUGT1	1154.81	-0.00658391	4.2831	0.0384932	0.412327
ENSG00000137642	SORL1	255.285	0.023712	4.28269	0.0385024	0.412327
ENSG00000272277		10.0442	-0.0245952	4.28067	0.0385481	0.412328
ENSG00000168517	HEXIM2	70.2397	-0.0116493	4.28041	0.0385541	0.412328
ENSG00000171222	SCAND1	1266.25	-0.0111555	4.27567	0.0386616	0.412893
ENSG00000167986	DDB1	7824.74	0.00432979	4.27391	0.0387017	0.412893
ENSG00000166887	VPS39	1836.74	0.00601726	4.27388	0.0387025	0.412893
ENSG00000253710	ALG11	292.169	0.0121612	4.27324	0.038717	0.412893
ENSG00000163636	PSMD6	1508.03	-0.0053089	4.27056	0.0387782	0.412893
ENSG00000186376	ZNF75D	209.465	0.0100478	4.27008	0.0387892	0.412893
ENSG00000167969	ECI1	739.757	-0.0141165	4.26913	0.0388109	0.412893
ENSG00000119242	CCDC92	1859.37	-0.00815333	4.269	0.0388137	0.412893
ENSG00000013275	PSMC4	2109.85	-0.00765698	4.2667	0.0388663	0.413178
ENSG00000110917	MLEC	6636.2	0.00673401	4.26533	0.0388976	0.413222
ENSG00000183617	MRPL54	509.516	-0.0109853	4.26084	0.0390006	0.413222
ENSG00000161217	PCYT1A	2684	0.00545614	4.25979	0.0390249	0.413222
ENSG00000174442	ZWILCH	235.235	-0.0107463	4.25855	0.0390532	0.413222
ENSG00000205041		14.7214	0.0280486	4.25743	0.0390791	0.413222
ENSG00000264522	OTUD7B	849.959	0.00831526	4.25548	0.0391239	0.413222
ENSG00000175324	LSM1	782.912	-0.00692851	4.2546	0.0391441	0.413222
ENSG00000183723	CMTM4	540.281	0.00970371	4.25391	0.0391601	0.413222
ENSG00000116580	GON4L	1202.33	0.00706386	4.25245	0.0391938	0.413222
ENSG00000105576	TNPO2	2475.15	0.00723388	4.25216	0.0392004	0.413222
ENSG00000173406	DAB1	14.8845	0.0769549	4.25211	0.0392016	0.413222
ENSG00000031003	FAM13B	815.011	0.0118351	4.25071	0.0392339	0.413222
ENSG00000168661	ZNF30	45.4742	0.0134729	4.2507	0.0392342	0.413222
ENSG00000112062	MAPK14	988.808	0.00738525	4.25059	0.0392368	0.413222
ENSG00000146021	KLHL3	106.915	0.0174668	4.24892	0.0392753	0.413222
ENSG00000135917	SLC19A3	20.7531	0.0281895	4.24853	0.0392843	0.413222
ENSG00000261136		10.9254	0.0326317	4.24088	0.0394616	0.413889
ENSG00000164237	CMBL	841.515	-0.00896629	4.24076	0.0394646	0.413889
ENSG00000139579	NABP2	797.923	-0.00776474	4.24001	0.039482	0.413889
ENSG00000187118	CMC1	227.588	-0.0106436	4.23956	0.0394923	0.413889
ENSG00000126088	UROD	1849.64	-0.00754552	4.23925	0.0394996	0.413889
ENSG00000156928	MALSU1	400.102	-0.00672434	4.23872	0.0395119	0.413889
ENSG00000169740	ZNF32	309	-0.00904611	4.23786	0.039532	0.413889
ENSG00000174231	PRPF8	9362.25	0.00476575	4.23492	0.0396004	0.413889
ENSG00000174151	CYB561D1	366.606	0.00890338	4.23291	0.0396473	0.413889
ENSG00000153936	HS2ST1	870.072	0.0128032	4.23243	0.0396587	0.413889
ENSG00000279010		180.299	-0.0132409	4.23079	0.0396968	0.413889
ENSG00000147536	GINS4	103.797	-0.0179213	4.22574	0.0398153	0.413889
ENSG00000158710	TAGLN2	12893.8	-0.0115961	4.22437	0.0398474	0.413889
ENSG00000254093	PINX1	224.371	-0.0106883	4.22391	0.0398583	0.413889
ENSG00000115464	USP34	2937.68	0.00885789	4.22247	0.039892	0.413889
ENSG00000110200	ANAPC15	523.673	-0.0101419	4.22187	0.0399062	0.413889
ENSG00000256269	HMBS	463.996	-0.0114827	4.21973	0.0399565	0.413889
ENSG00000227097	RPS28P7	1377.87	-0.0115643	4.21835	0.039989	0.413889
ENSG00000029364	SLC39A9	1928.25	0.0082494	4.21819	0.0399927	0.413889
ENSG00000166377	ATP9B	660.441	0.0071302	4.21618	0.0400402	0.413889
ENSG00000097096	SYDE2	162.319	0.0188092	4.21597	0.0400451	0.413889
ENSG00000258017		355.061	-0.0228955	4.21578	0.0400497	0.413889
ENSG00000159082	SYNJ1	313.663	0.0148685	4.21455	0.0400788	0.413889
ENSG00000007520	TSR3	1477.3	-0.0101871	4.21336	0.0401069	0.413889
ENSG00000213625	LEPROT	2503.47	0.00904192	4.21332	0.0401078	0.413889
ENSG00000111196	MAGOHB	185.361	-0.0124531	4.21305	0.0401142	0.413889
ENSG00000099330	OCEL1	258.006	-0.010632	4.21204	0.040138	0.413889
ENSG00000103490	PYCARD	266.259	-0.0192418	4.21201	0.0401388	0.413889
ENSG00000165669	FAM204A	521.296	-0.00617113	4.21197	0.0401397	0.413889
ENSG00000147649	MTDH	3582.98	0.0111918	4.21091	0.0401647	0.413889
ENSG00000156467	UQCRB	3040.2	-0.00893522	4.20967	0.0401942	0.413889
ENSG00000148688	RPP30	353.564	-0.00807463	4.20939	0.0402007	0.413889
ENSG00000114784	EIF1B	1091.9	-0.00886373	4.20833	0.0402258	0.413889
ENSG00000077348	EXOSC5	214.703	-0.0130164	4.20752	0.040245	0.413889
ENSG00000144028	SNRNP200	5218.95	0.00428212	4.20639	0.0402719	0.413889
ENSG00000181924	COA4	772.925	-0.00968013	4.20604	0.0402802	0.413889
ENSG00000277972	CISD3	550.623	-0.0103718	4.20429	0.0403218	0.41405
ENSG00000067182	TNFRSF1A	6692.12	0.00742219	4.20028	0.0404173	0.414321
ENSG00000225650	EIF2S2P5	8.84063	-0.0237208	4.19867	0.0404556	0.414321
ENSG00000172264	MACROD2	46.7832	0.0212442	4.19756	0.0404823	0.414321
ENSG00000158636	EMSY	413.07	0.00909681	4.19702	0.0404951	0.414321
ENSG00000100908	EMC9	175.137	-0.0150269	4.19441	0.0405575	0.414321
ENSG00000109917	ZPR1	1538.47	-0.00752403	4.1942	0.0405624	0.414321
ENSG00000198315	ZKSCAN8	739.953	0.00850608	4.19382	0.0405717	0.414321
ENSG00000053501	USE1	333.258	-0.010113	4.19345	0.0405805	0.414321
ENSG00000137100	DCTN3	969.752	-0.00930229	4.19233	0.0406072	0.414321
ENSG00000182957	SPATA13	332.008	0.0250376	4.19156	0.0406258	0.414321
ENSG00000272760		14.4378	-0.0217408	4.19124	0.0406334	0.414321
ENSG00000213516	RBMXL1	256.245	0.00883838	4.18672	0.0407419	0.414451
ENSG00000104205	SGK3	153.566	0.0111329	4.18581	0.0407638	0.414451
ENSG00000130508	PXDN	41635.8	0.0111276	4.1854	0.0407735	0.414451
ENSG00000092148	HECTD1	2691.84	0.0103572	4.18535	0.0407748	0.414451
ENSG00000184634	MED12	1323.47	0.00678276	4.18503	0.0407826	0.414451
ENSG00000030419	IKZF2	22.3339	0.0267143	4.18423	0.0408018	0.414451
ENSG00000276710	CSPG4P10	27.5978	0.0271478	4.18287	0.0408345	0.41452
ENSG00000176974	SHMT1	226.302	-0.0133769	4.18172	0.0408623	0.414539
ENSG00000135828	RNASEL	187.959	0.0135153	4.1754	0.0410149	0.415622
ENSG00000101608	MYL12A	9002.32	-0.00810084	4.17494	0.0410261	0.415622
ENSG00000183751	TBL3	1129.82	-0.00570479	4.17361	0.0410583	0.415622
ENSG00000169714	CNBP	3649.93	-0.00728159	4.17267	0.0410811	0.415622
ENSG00000269743	SLC25A53	53.2485	0.00881784	4.17078	0.0411267	0.415622
ENSG00000198830	HMGN2	3495.15	-0.0175255	4.16984	0.0411496	0.415622
ENSG00000172361	CFAP53	9.77256	-0.026757	4.16978	0.0411512	0.415622
ENSG00000078295	ADCY2	26.8756	0.033287	4.16738	0.0412095	0.415715
ENSG00000173349	SFT2D3	194.305	0.00808863	4.16647	0.0412316	0.415715
ENSG00000196465	MYL6B	1342.81	-0.0120214	4.16619	0.0412385	0.415715
ENSG00000165630	PRPF18	338.497	-0.00584721	4.16258	0.0413264	0.416156
ENSG00000163517	HDAC11	403.484	-0.00813794	4.16226	0.0413343	0.416156
ENSG00000258297		128.395	0.0111132	4.15878	0.0414191	0.416664
ENSG00000229043	ZFAND2A-DT	78.6418	-0.019157	4.15806	0.0414369	0.416664
ENSG00000141076	UTP4	1110.45	-0.00629556	4.15435	0.0415278	0.416822
ENSG00000076321	KLHL20	452.344	0.00826874	4.1528	0.0415657	0.416822
ENSG00000126247	CAPNS1	11530.7	-0.0113686	4.15154	0.0415966	0.416822
ENSG00000011201	ANOS1	755.832	0.0207919	4.15042	0.0416242	0.416822
ENSG00000147669	POLR2K	655.881	-0.00713417	4.15036	0.0416257	0.416822
ENSG00000262814	MRPL12	1313.45	-0.0115959	4.1501	0.0416321	0.416822
ENSG00000126106	TMEM53	138.197	-0.00904558	4.14862	0.0416686	0.416822
ENSG00000260196		172.078	-0.0149106	4.14852	0.041671	0.416822
ENSG00000146247	PHIP	401.717	0.0142939	4.14785	0.0416874	0.416822
ENSG00000130244	FAM98C	286.238	-0.00892166	4.14679	0.0417135	0.416822
ENSG00000090376	IRAK3	126.053	0.0252235	4.1449	0.0417602	0.416937
ENSG00000272767	JMJD1C-AS1	20.9096	-0.0185046	4.14343	0.0417965	0.416937
ENSG00000153956	CACNA2D1	672.457	0.0222805	4.14315	0.0418033	0.416937
ENSG00000257093	DENND11	258.55	0.0104726	4.14144	0.0418456	0.417
ENSG00000173905	GOLIM4	2938.32	0.013026	4.14078	0.0418618	0.417
ENSG00000107077	KDM4C	486.396	0.00669233	4.13845	0.0419196	0.417316
ENSG00000072422	RHOBTB1	517.018	0.0117814	4.13469	0.0420127	0.417982
ENSG00000130338	TULP4	971.984	0.0105806	4.13294	0.0420561	0.417995
ENSG00000072571	HMMR	111.859	-0.0271099	4.13163	0.0420889	0.417995
ENSG00000188064	WNT7B	15.876	0.0239665	4.13068	0.0421125	0.417995
ENSG00000254870	ATP6V1G2-DDX39B	515.835	0.0270472	4.13043	0.0421187	0.417995
ENSG00000071462	BUD23	1507.99	-0.00746392	4.12628	0.0422221	0.418503
ENSG00000279519		19.3654	0.0193088	4.12566	0.0422376	0.418503
ENSG00000175548	ALG10B	74.7613	0.0152702	4.12404	0.0422779	0.418503
ENSG00000011485	PPP5C	1588.75	-0.00719191	4.12318	0.0422994	0.418503
ENSG00000131849	ZNF132	73.692	0.0126812	4.12313	0.0423008	0.418503
ENSG00000152223	EPG5	3205.88	0.0183687	4.12086	0.0423576	0.418805
ENSG00000145734	BDP1	481.038	0.0173208	4.1166	0.0424644	0.419363
ENSG00000176731	RBIS	483.496	-0.011402	4.11576	0.0424855	0.419363
ENSG00000188342	GTF2F2	753.379	-0.00678319	4.11547	0.0424928	0.419363
ENSG00000197448	GSTK1	1639.15	-0.00688607	4.11233	0.0425717	0.419883
ENSG00000182473	EXOC7	4316.35	0.00431199	4.11014	0.0426269	0.419946
ENSG00000103199	ZNF500	354.228	0.00761086	4.10911	0.0426528	0.419946
ENSG00000242697	RPL5P12	186.071	-0.0145175	4.10895	0.042657	0.419946
ENSG00000186871	ERCC6L	39.7882	-0.0331916	4.10552	0.0427435	0.420145
ENSG00000048471	SNX29	764.035	0.00947266	4.10409	0.0427797	0.420145
ENSG00000146410	MTFR2	25.1449	-0.0199173	4.10363	0.0427911	0.420145
ENSG00000232388	SMIM26	461.042	-0.00938462	4.10238	0.0428229	0.420145
ENSG00000170921	TANC2	1101.46	0.013284	4.10019	0.0428784	0.420145
ENSG00000145012	LPP	3146.43	0.0103807	4.09996	0.0428842	0.420145
ENSG00000091164	TXNL1	1673.07	-0.00660311	4.0987	0.0429162	0.420145
ENSG00000214413	BBIP1	326.354	-0.00803233	4.09866	0.0429171	0.420145
ENSG00000243312	RPL6P13	410.332	-0.0137234	4.09726	0.0429528	0.420145
ENSG00000119878	CRIPT	163.502	-0.00965541	4.09632	0.0429767	0.420145
ENSG00000011052	NME1-NME2	372.498	-0.0183866	4.09532	0.0430021	0.420145
ENSG00000153827	TRIP12	4642.92	0.00950917	4.09469	0.0430182	0.420145
ENSG00000100714	MTHFD1	1728.53	-0.00698264	4.09282	0.0430657	0.420145
ENSG00000134697	GNL2	1606.9	-0.00845715	4.09059	0.0431226	0.420145
ENSG00000132603	NIP7	607.147	-0.00671341	4.09029	0.0431303	0.420145
ENSG00000054793	ATP9A	1448.12	0.0124245	4.08987	0.043141	0.420145
ENSG00000138785	INTS12	396.226	-0.00635493	4.08981	0.0431425	0.420145
ENSG00000205643	CDPF1	153.788	-0.0079218	4.08925	0.0431567	0.420145
ENSG00000156466	GDF6	775.971	0.0314149	4.0884	0.0431785	0.420145
ENSG00000184838	PRR16	279.85	0.017551	4.08661	0.0432242	0.420145
ENSG00000157450	RNF111	777.522	0.0112208	4.08641	0.0432293	0.420145
ENSG00000076043	REXO2	3876.68	-0.00859736	4.08011	0.0433909	0.420774
ENSG00000275371		13.0447	0.026108	4.07963	0.0434032	0.420774
ENSG00000189184	PCDH18	743.44	0.0294838	4.07836	0.0434357	0.420774
ENSG00000149557	FEZ1	888.643	-0.0120173	4.07781	0.04345	0.420774
ENSG00000188186	LAMTOR4	704.015	-0.0103082	4.07762	0.0434549	0.420774
ENSG00000280211		17.8356	-0.0218163	4.07537	0.0435126	0.420774
ENSG00000136938	ANP32B	2647.79	-0.0136806	4.07508	0.0435201	0.420774
ENSG00000092931	MFSD11	535.548	0.00862549	4.07061	0.0436355	0.420774
ENSG00000170801	HTRA3	177.211	0.0318496	4.07027	0.0436444	0.420774
ENSG00000254999	BRK1	2133.15	-0.00712821	4.06933	0.0436686	0.420774
ENSG00000101132	PFDN4	469.609	-0.0121166	4.06836	0.0436937	0.420774
ENSG00000169607	CKAP2L	149.414	-0.0266905	4.06801	0.0437028	0.420774
ENSG00000112167	SAYSD1	176.973	-0.00907343	4.06777	0.043709	0.420774
ENSG00000054523	KIF1B	1360.88	0.01094	4.06751	0.0437157	0.420774
ENSG00000126768	TIMM17B	546.172	-0.0117206	4.06652	0.0437412	0.420774
ENSG00000170871	KIAA0232	830.637	0.0102131	4.06569	0.0437627	0.420774
ENSG00000117713	ARID1A	3125.94	0.00814754	4.06398	0.0438072	0.420774
ENSG00000166507	NDST2	1085.6	0.00977663	4.06377	0.0438125	0.420774
ENSG00000160161	CILP2	38.8426	0.0297126	4.06362	0.0438164	0.420774
ENSG00000179041	RRS1	731.187	-0.0091504	4.06319	0.0438277	0.420774
ENSG00000182568	SATB1	405.206	0.0179205	4.05971	0.043918	0.420774
ENSG00000145040	UCN2	65.3653	0.0308462	4.05962	0.0439203	0.420774
ENSG00000109534	GAR1	363.663	-0.010461	4.05614	0.044011	0.420774
ENSG00000169957	ZNF768	1071.58	-0.00813943	4.05511	0.0440379	0.420774
ENSG00000143641	GALNT2	12717.8	0.00878465	4.05434	0.044058	0.420774
ENSG00000147684	NDUFB9	1669.56	-0.00958766	4.05388	0.04407	0.420774
ENSG00000124177	CHD6	1109.48	0.010124	4.05349	0.0440801	0.420774
ENSG00000254452		21.0271	-0.0268852	4.05343	0.0440816	0.420774
ENSG00000169564	PCBP1	6185.47	-0.00636047	4.05296	0.044094	0.420774
ENSG00000130159	ECSIT	533.058	-0.0106171	4.05229	0.0441116	0.420774
ENSG00000035403	VCL	14182.9	0.0106532	4.05024	0.044165	0.420774
ENSG00000120278	PLEKHG1	46.5382	0.0245756	4.04963	0.0441811	0.420774
ENSG00000205885	C1RL-AS1	111.984	0.0203981	4.04618	0.0442715	0.420774
ENSG00000142798	HSPG2	50474.8	0.0120192	4.04569	0.0442844	0.420774
ENSG00000183336	BOLA2	178.149	-0.0110773	4.04393	0.0443305	0.420774
ENSG00000164758	MED30	95.8486	-0.0111715	4.04365	0.0443379	0.420774
ENSG00000181938	GINS3	54.2649	-0.0129769	4.04197	0.0443819	0.420774
ENSG00000170234	PWWP2A	488.966	0.00794022	4.04103	0.0444067	0.420774
ENSG00000236901	MIR600HG	23.0147	0.0180459	4.04072	0.0444149	0.420774
ENSG00000117479	SLC19A2	432.895	0.0159971	4.04064	0.0444169	0.420774
ENSG00000198862	LTN1	540.595	0.0153299	4.03801	0.0444863	0.420774
ENSG00000125743	SNRPD2	3006.42	-0.0110373	4.03656	0.0445246	0.420774
ENSG00000144488	ESPNL	198.548	0.0348473	4.03567	0.044548	0.420774
ENSG00000099804	CDC34	1989.86	-0.00829795	4.03506	0.044564	0.420774
ENSG00000142541	RPL13A	36202	-0.00890549	4.03431	0.0445838	0.420774
ENSG00000283472		293.024	0.0232339	4.03261	0.0446288	0.420774
ENSG00000196739	COL27A1	1426.58	0.0126426	4.0304	0.0446872	0.420774
ENSG00000144741	SLC25A26	246.964	-0.00713833	4.03034	0.0446889	0.420774
ENSG00000165724	ZMYND19	533.677	-0.00801411	4.02987	0.0447014	0.420774
ENSG00000166295	ANAPC16	749.003	-0.00749361	4.02939	0.0447141	0.420774
ENSG00000108021	TASOR2	1508.9	0.0118046	4.02771	0.0447587	0.420774
ENSG00000196700	ZNF512B	1437.52	0.00727042	4.02729	0.0447698	0.420774
ENSG00000166337	TAF10	1754.96	-0.0128554	4.02715	0.0447735	0.420774
ENSG00000134313	KIDINS220	2549.01	0.010322	4.02657	0.0447888	0.420774
ENSG00000130706	ADRM1	3595.75	-0.00836623	4.02648	0.0447914	0.420774
ENSG00000108590	MED31	178.732	-0.00833792	4.02525	0.0448241	0.420774
ENSG00000165813	CCDC186	374.186	0.0158555	4.02458	0.0448418	0.420774
ENSG00000130560	UBAC1	770.953	-0.00615167	4.02397	0.044858	0.420774
ENSG00000268043	NBPF12	545.507	0.0122097	4.02303	0.0448829	0.420774
ENSG00000116604	MEF2D	2031.26	0.00923111	4.02221	0.0449048	0.420774
ENSG00000123416	TUBA1B	17964.2	-0.0164572	4.0211	0.0449345	0.420774
ENSG00000224032	EPB41L4A-AS1	334.376	-0.0111744	4.02046	0.0449515	0.420774
ENSG00000130165	ELOF1	1105.33	-0.0104712	4.0204	0.0449532	0.420774
ENSG00000179899	PHC1P1	84.4436	0.0232577	4.01936	0.0449808	0.420786
ENSG00000198887	SMC5	830.118	0.00970974	4.01681	0.0450489	0.420962
ENSG00000165644	COMTD1	157.477	-0.0138559	4.01635	0.0450612	0.420962
ENSG00000138018	SELENOI	545.33	0.0112478	4.01275	0.0451574	0.420962
ENSG00000136205	TNS3	6114.76	0.0199708	4.01078	0.0452103	0.420962
ENSG00000101266	CSNK2A1	2841.15	-0.00387204	4.01029	0.0452232	0.420962
ENSG00000138587	MNS1	28.6014	-0.0209327	4.00911	0.0452551	0.420962
ENSG00000146463	ZMYM4	1595.62	0.00661297	4.00902	0.0452574	0.420962
ENSG00000004779	NDUFAB1	881.408	-0.00951619	4.00605	0.0453372	0.420962
ENSG00000006757	PNPLA4	286.883	-0.011488	4.003	0.0454192	0.420962
ENSG00000176407	KCMF1	1559.15	-0.0069904	4.0026	0.0454301	0.420962
ENSG00000153107	ANAPC1	1086.77	0.00673086	4.00109	0.045471	0.420962
ENSG00000164610	RP9	298.85	-0.0118884	4.00095	0.0454745	0.420962
ENSG00000164105	SAP30	168.244	-0.010057	4.00088	0.0454766	0.420962
ENSG00000135624	CCT7	6188.07	-0.00680925	4.00025	0.0454936	0.420962
ENSG00000124343	XG	44.1782	-0.0380009	3.99988	0.0455036	0.420962
ENSG00000175203	DCTN2	3449.43	-0.00534134	3.99836	0.0455446	0.420962
ENSG00000135632	SMYD5	562.615	-0.00805445	3.99652	0.0455943	0.420962
ENSG00000140992	PDPK1	1384.09	0.00903821	3.99618	0.0456035	0.420962
ENSG00000174483	BBS1	607.419	0.00811252	3.99601	0.0456081	0.420962
ENSG00000260603		37.508	-0.0248776	3.99595	0.0456096	0.420962
ENSG00000078142	PIK3C3	821.822	0.00780832	3.99594	0.0456099	0.420962
ENSG00000111328	CDK2AP1	4666.13	-0.0101568	3.99556	0.0456202	0.420962
ENSG00000110801	PSMD9	1219.46	-0.00770255	3.99511	0.0456325	0.420962
ENSG00000255234	CCDC90B-AS1	12.9075	0.0244712	3.99474	0.0456425	0.420962
ENSG00000137547	MRPL15	567.881	-0.00906102	3.99363	0.0456725	0.420962
ENSG00000173457	PPP1R14B	3860.01	-0.0134862	3.99307	0.0456877	0.420962
ENSG00000259494	MRPL46	258.99	-0.0086541	3.99132	0.0457351	0.420962
ENSG00000170456	DENND5B	589.592	0.0205137	3.99125	0.0457373	0.420962
ENSG00000145817	YIPF5	4352.93	0.0144271	3.98971	0.045779	0.421077
ENSG00000111670	GNPTAB	2115.81	0.0176616	3.98654	0.0458652	0.421077
ENSG00000164151	ICE1	1173.58	0.0088099	3.98611	0.0458769	0.421077
ENSG00000119938	PPP1R3C	2855.73	0.0207532	3.9856	0.0458906	0.421077
ENSG00000277152		13.5798	0.0245599	3.98554	0.0458924	0.421077
ENSG00000274602	PI4KAP1	223.667	0.0290131	3.98333	0.0459527	0.421077
ENSG00000167515	TRAPPC2L	1165.46	-0.00989356	3.98291	0.0459642	0.421077
ENSG00000007202	KIAA0100	6111.74	0.00591259	3.98266	0.0459708	0.421077
ENSG00000213465	ARL2	1614.26	-0.0119764	3.98127	0.0460088	0.421077
ENSG00000100154	TTC28	1681.8	0.00792441	3.98051	0.0460298	0.421077
ENSG00000051180	RAD51	78.7524	-0.0176689	3.98014	0.0460397	0.421077
ENSG00000272916		86.8938	0.0155356	3.97808	0.046096	0.421351
ENSG00000141449	GREB1L	113.802	0.0314482	3.9749	0.0461831	0.421906
ENSG00000187051	RPS19BP1	1313.53	-0.0102353	3.97143	0.0462786	0.422053
ENSG00000116691	MIIP	480.855	-0.0106673	3.96925	0.0463385	0.422053
ENSG00000145293	ENOPH1	609.013	-0.00652745	3.96781	0.0463781	0.422053
ENSG00000121766	ZCCHC17	717.001	-0.00728062	3.96716	0.0463959	0.422053
ENSG00000253982	CLN8-AS1	157.693	-0.0124348	3.96688	0.0464038	0.422053
ENSG00000160710	ADAR	5081.72	0.00710117	3.96645	0.0464156	0.422053
ENSG00000101365	IDH3B	1365.76	-0.00645009	3.96632	0.0464191	0.422053
ENSG00000100320	RBFOX2	4196.27	0.00629102	3.96569	0.0464365	0.422053
ENSG00000206190	ATP10A	498.871	0.0238693	3.96534	0.0464462	0.422053
[truncated: 14,220 more rows]

## Sheet: Table S6
Table S6. Gene set enrichment analysis: Pathways enriched for gene expression associated with FM% at birth
[truncated: 1,986 more rows]

[truncated: 9 more sheets: Table S7, Table S8, Table S9, Table S10, Table S11, Table S12, Table S13, Table S14, Table S15]
