# Supplementary material for: Mitochondrial signatures of infant mesenchymal stem cells predict child adiposity: The Healthy Start Study
Source: Research Square preprint supplement (doi:10.21203/rs.3.rs-9476945/v1), 2026-05-11
Supplement: Supplementary file 1 [file b6f0a6d4a92cdb96e03d6815.docx]

**Supplementary Methods for:**

**Title**: Mitochondrial signatures of infant mesenchymal stem cells predict child adiposity: The Healthy Start Study

**Authors**: Lauren E. Gyllenhammer1,Madeline Rose Keleher2, Cheyret Wood3, Ivana V. Yang4,5, Jacob E. Friedman6, Thomas Jansson7, Dana Dabelea5,8, Katerina Kechris3,5, Kristen E. Boyle2,5

**RNA sequencing and DNA methylation**

*RNA isolation & sequencing*

We isolated DNA and RNA from frozen cell pellets using the Qiagen AllPrep kit. We assessed RNA quantity by Qubit (Thermo Fisher Scientific). We performed polyA tail selection with the Nugen mRNA kit and performed RNA-seq in two batches, the first on Illumina HiSeq4000 with 1x150bp reads and the second with 2x150bp flow cell runs on Illumina NovaSEQ 6000, with 40 million reads/sample.

*DNA isolation & bisulfite conversion*

We assessed genomic DNA purity, quality, and quantity using the Nanodrop 2000 (ThermoFisher), Bioanalyzer 2100 (Agilent), and Qubit fluorometer (ThermoFisher), respectively. We bisulfite converted ~500 ng of genomic DNA using the ZymoEZ DNA methylation kit (Zymo Research) with commercially available positive and negative controls. The University of Colorado Genomics and Microarray Core measured DNA methylation on bisulfite converted DNA using the Illumina Infinium Human Methylation EPIC Beadchip.

***Statistical Analysis***

*Untargeted Transcriptomic Analyses*

Data Cleaning, Quality Control, and Normalization

We quantified gene counts using Ensembl annotation for GrCh 38 (version 86, accessed 08/23/2017), filtering those with <10 average reads/sample across (15,970 genes). To correct for batch and technical effects, we applied RUVg (Removal of Unwanted Variance using Empirically Derived Control Genes),1 removing the quartile of least variable genes (4,000 genes). For at birth and infant (4-6mo) time points 2 factors were included and for early childhood (4-6yr 3 factors were used.

Differential Expression Analysis

To test for association between %FM and gene expression, we fit a negative binomial model, adjusting for offspring sex and offspring age at measurement. For scans taken at birth, we used gestational age. For models where infant sex or age was significantly associated with FM% (P<0.05), we performed sensitivity analyses testing association of adjusted FM% (FM% minus random effect age or sex) with transcript data to verify these covariates were no longer significant. We applied Benjamini-Hochberg false discovery rate (FDR) correction.2 Plotted gene counts are RUVg normalized, adjusted for size factors, and log2 transformed with a 0.5 pseudo-count added.

Gene Sset Enrichment Analysis and Identification of Leading Edge Genes

We performed gene set enrichment analysis (GSEA) for Gene Ontology (GO) and Reactome pathways using Fast Gene Set Enrichment Analysis (fgsea ver. 1.16.0).3 GSEA uses all transcripts as input pre-ranked by log10 of p-value and direction of association, and has the capacity to detect coordinated, modest shifts across biologically related gene sets, not just large individual signals. We only included pathways if they contained 15-500 genes, per user guide. We visualized GSEA pathways using the EnrichmentMap plugin for Cytoscape.4,5 The directional magnitude for each pathway was modeled using a normalized enrichment score (NES), which reflects the strength and direction of coordinated enrichment of predefined gene sets across the ranked transcript list. NES accounts for differences in gene set size through permutation-based normalization, enabling valid comparison of enrichment magnitude across pathways or genomic regions.

Next, we identified leading edge genes from significant pathways (FDR<0.05). Leading edge genes were defined as the subset of genes within an enriched gene set that occur before the peak enrichment score in the ranked gene list. They represent the subset of genes within an enriched pathway that contribute most strongly to the enrichment score, and therefore drive the association between the pathway and child %FM. We evaluated overlap of leading edge genes from the 4-6 year timepoint with at least one other timepoint using a fisher’s exact test. These overlapping genes were used as input for the subsequent targeted methylation analyses.

*Targeted DNA Methylation Analysis*

Data Cleaning, Quality Control, and Normalization

We performed data processing as previously described.(1) Briefly, during quality control we excluded probes with high detection *p*-value (<0.01) in >10% of samples (*n*=1,247), probes with beadcount <3 in ³5% of samples (*n*=9,205), cross-reactive probes (*n*=29,819),(2) and polymorphic probes with minor allele frequency (*n*=29,819). We identified, but did not exclude non-CG probes (*n*=2,982) and probes on autosomes and allosomes. 811 non-mapping probes were also removed. There were 3 samples where reported and predicted sex by DNA methylation did not match. Derived sex from DNA methylation was used in analyses and reported in Table 1. We converted raw methylation (beta) values to *M*-values, where *M* = log[beta/(1-beta)] and performed stratified quantile normalization using Minfi6 and batch correction with ComBat.7 The final dataset contained 785,089 probes. Of these,18,529 probes mapped to leading edge genes identified by GSEA, which we used to test for association of MSC DNA methylation with child adiposity.

Identification of Differentially Methylated Probes

We estimated associations between each FM% and MSC DNA methylation (M-value) at each of 18,529 CpGs (predictors) using linear regression models adjusting for infant sex and age. Raw *p*-values were adjusted for multiple comparisons using the Benjamini-Hochberg procedure2 separately for each child timepoint. False discovery rate (FDR)<0.05 indicated significant differentially methylated probes (DMPs). We verified model assumptions (e.g., linearity, homoscedasticity, outlier presence) using scatterplots and diagnostic plots.

*Identification of Differentially Methylated Regions*

To test for differentially methylated regions (DMRs), we used the R package Methylated CpGs Set Enrichment Analysis (mCSEA ver. 1.18.0), which evaluates probe enrichment of CpGs within predefined gene regions (e.g., promoters, gene bodies, CpG islands) using a GSEA implementation (fgsea ver. 1.24.0). Probes were ranked based on the direction of effect and -log10 of the p-value. Regions were only included if there were at least 5 probes in the region. To correct for multiple testing FDR adjustment was implemented. The directional magnitude for each gene region was modeled using NES, which reflects the strength and direction of coordinated enrichment of predefined genomic feature across the ranked probe list.

**MSC in vitro adiposity measure**

To complement the child adiposity phenotype measured in vivo (%FM), we used an established MSC in vitro adiposity phenotype.8 This was modeled as previously described.8 Specifically, after inducing adipogenic differentiation for 21 days, we quantified triglyceride (TG) accumulation as a direct, cell-based measure of adipocyte lipid storage propensity. We refer to this experimental outcome as *in vitro* MSC adiposity (MSC‑TG). Total lipids were extracted using the Bligh and Dryer method,9 and TG was quantified with a commercial kit (Sigma-Millipore), then normalized to protein content via BCA assay (Thermofisher).

**References**

1. Risso D, Ngai J, Speed TP, Dudoit S. Normalization of RNA-seq data using factor analysis of control genes or samples*.* *Nat Biotechnol*, 2014; 32(9):896-902.

2. Benjamini Y, Hochberg Y. Controlling the False Discovery Rate: A Practical and Powerful Approach to Multiple Testing*.* *Journal of the Royal Statistical Society: Series B (Methodological)*, 2018; 57(1):289-300.

3. Korotkevich G, Sukhov V, Budin N, et al. Fast gene set enrichment analysis*.* *bioRxiv*, 2021:060012.

4. Merico D, Isserlin R, Stueker O, Emili A, Bader GD. Enrichment map: a network-based method for gene-set enrichment visualization and interpretation*.* *PLoS One*, 2010; 5(11):e13984.

5. Shannon P, Markiel A, Ozier O, et al. Cytoscape: a software environment for integrated models of biomolecular interaction networks*.* *Genome Res*, 2003; 13(11):2498-504.

6. Aryee MJ, Jaffe AE, Corrada-Bravo H, et al. Minfi: a flexible and comprehensive Bioconductor package for the analysis of Infinium DNA methylation microarrays*.* *Bioinformatics*, 2014; 30(10):1363-9.

7. Johnson WE, Li C, Rabinovic A. Adjusting batch effects in microarray expression data using empirical Bayes methods*.* *Biostatistics*, 2007; 8(1):118-27.

8. Gyllenhammer LE, Duensing AM, Keleher MR, et al. Fat content in infant mesenchymal stem cells prospectively associates with childhood adiposity and fasting glucose*.* *Obesity (Silver Spring)*, 2023; 31(1):37-42.

9. Bligh EG, Dyer WJ. A rapid method of total lipid extraction and purification*.* *Can J Biochem Physiol*, 1959; 37(8):911-7.

10. Boyle KE, Patinkin ZW, Shapiro ALB, et al. Maternal obesity alters fatty acid oxidation, AMPK activity, and associated DNA methylation in mesenchymal stem cells from human infants*.* *Mol Metab*, 2017; 6(11):1503-1516.

11. Erickson ML, Patinkin ZW, Duensing AM, et al. Maternal metabolic health drives mesenchymal stem cell metabolism and infant fat mass at birth*.* *JCI Insight*, 2021; 6(13).
